# Supplementary material for: A Plasmodium falciparum MORC protein complex modulates epigenetic control of gene expression through interaction with heterochromatin
Source: eLife journal article supplement (doi:10.7554/elife.92201), 2023-11-16
Supplement: figures [file elife-92201-figures-v1.pdf]

---

## Figures and figure supplements

A *Plasmodium falciparum* MORC protein complex modulates epigenetic control of gene expression through interaction with heterochromatin

**Maneesh Kumar Singh and Victoria Ann Bonnell et al.**

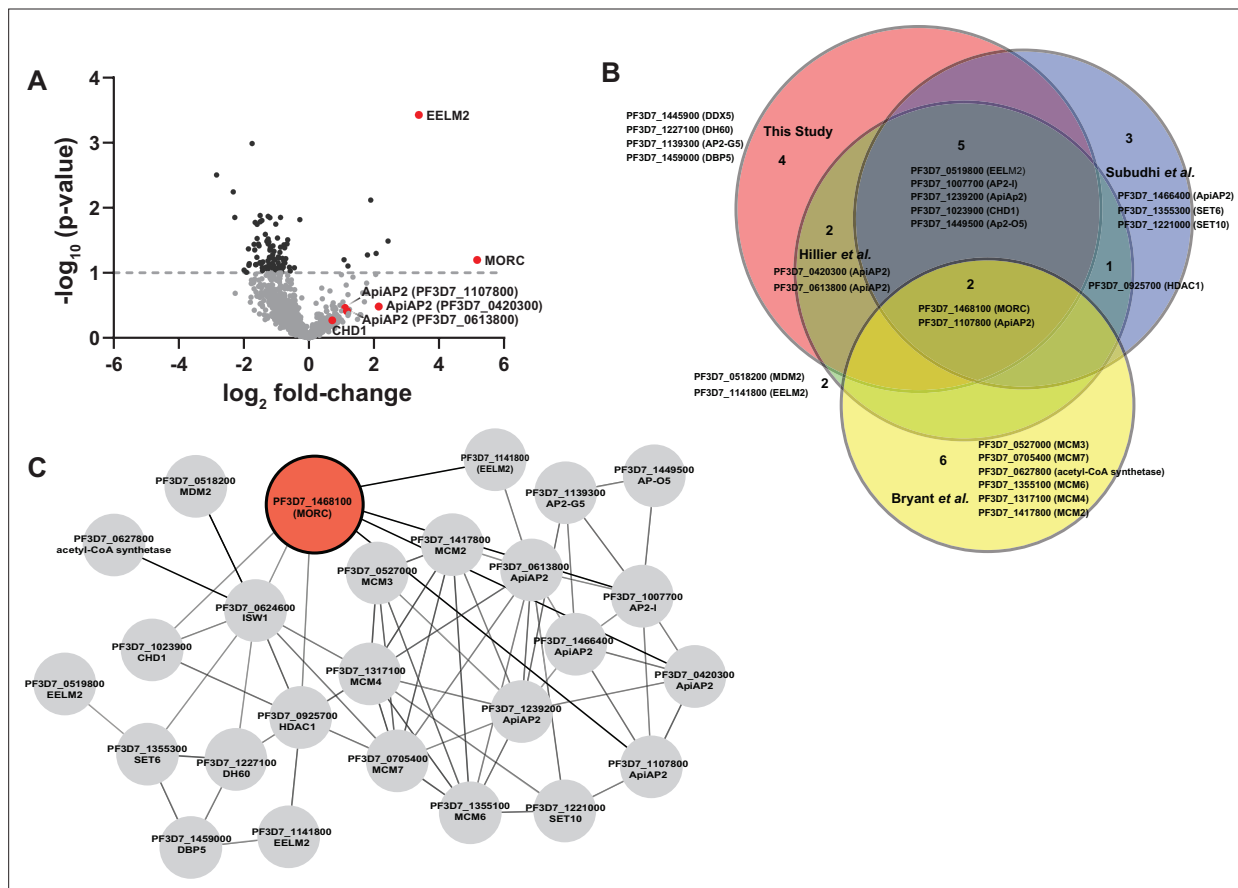

**Figure 1.** Proteomic analysis of parasites expressing *PfMORC*<sup>GFP</sup> reveals *PfMORC* association with nuclear proteins of epigenetic regulation. **(A)** Volcano plot illustrates the protein enrichment in label free LC-MS/MS analysis of *PfMORC* ColPed proteins from three independent experiments at 32 hours post invasion (hpi). For normalized MS/MS counts, Student's t-test was performed and proteins were ranked as  $-\log_2$  fold-change (x-axis) versus statistical p-values (y-axis). Gray dashed horizontal line shows the p-value cutoff. **(B)** Comparative analysis showing the juxtaposition of specific proteins ColPed in *PfMORC*<sup>GFP</sup> with selected proteins from recent works of Hillier et al., Bryant et al., and Subudhi et al., where ApiAP2 or ISW1 were used as bait in similar ColP experiments. The Venn diagram illustrates the overlap between identified proteins, revealing that the intersecting proteins are primarily ApiAP2 and chromatin remodelers. **(C)** An interactive protein-protein interaction network is constructed with proteins known to interact with *PfMORC*, using proteins identified in this study and proteins documented in previously published works. Proteins identified in this study with known interaction networks from the STRING database were used to curate the network employing Cytoscape to enrich the network quality.

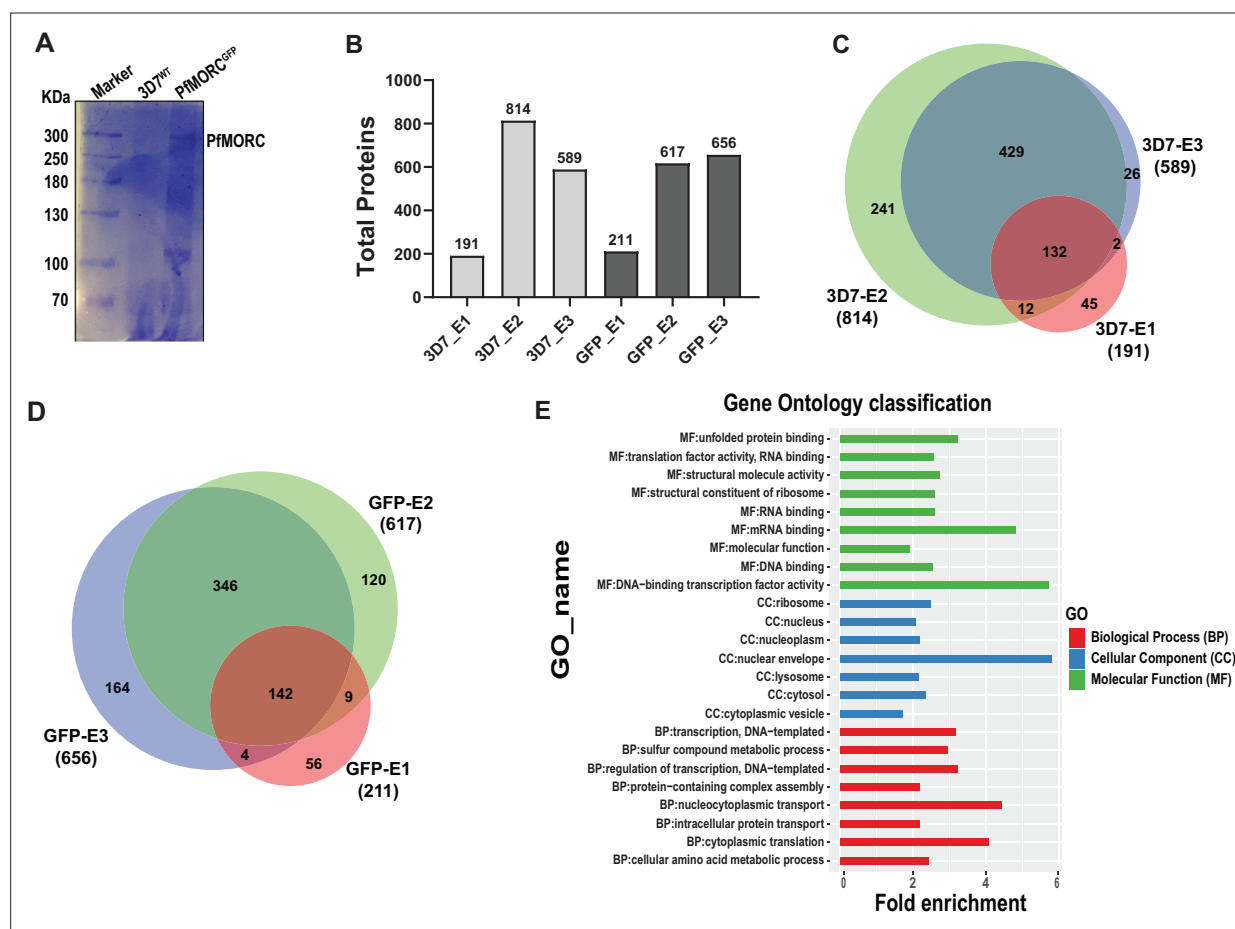

**Figure 1—figure supplement 1.** Proteomic analysis of PfMORC interacting proteins identified in *Plasmodium falciparum* lysate. **(A)** Coomassie-stained 6% SDS–PAGE gel showing the parasite lysate of wild-type 3D7 and PfMORC<sup>GFP</sup> after coimmunoprecipitation with anti-GFP magnetic beads. Both lanes were used for mass spectrometry analysis. **(B)** Histogram shows the total proteins identified in mass spectrometry analysis from three biological replicates in wild-type 3D7 and PfMORC<sup>GFP</sup> coimmunoprecipitated samples. Venn diagram illustrates the labeled free LC-MS/MS enrichment of peptide hits obtained from **(C)** 3D7 control and **(D)** from PfMORC<sup>GFP</sup> parasites lysate. Briefly, 32 hpi ( $\pm 4$  hr) trophozoite stage parasites were harvested and lysed, followed by incubation with anti-GFP-Trap-A beads from three independent biological replicates were used for quantification. False discovery rate (FDR) of 1% and peptides  $\geq 2$  leads to identifying 191, 814, 589, and 211, 617, 656 significant proteins in 3D7 and PfMORC<sup>GFP</sup>, respectively. **(E)** MS/MS normalization of identified proteins from 3D7 parasites expressing PfMORC and transgenic parasites expressing GFP (PfMORC<sup>GFP</sup>) was carried out. Gene Ontology classification showing biological process, cellular component, and molecular function of PfMORC<sup>GFP</sup>/3D7 normalized proteins showing fold change  $\geq 1.5$ .

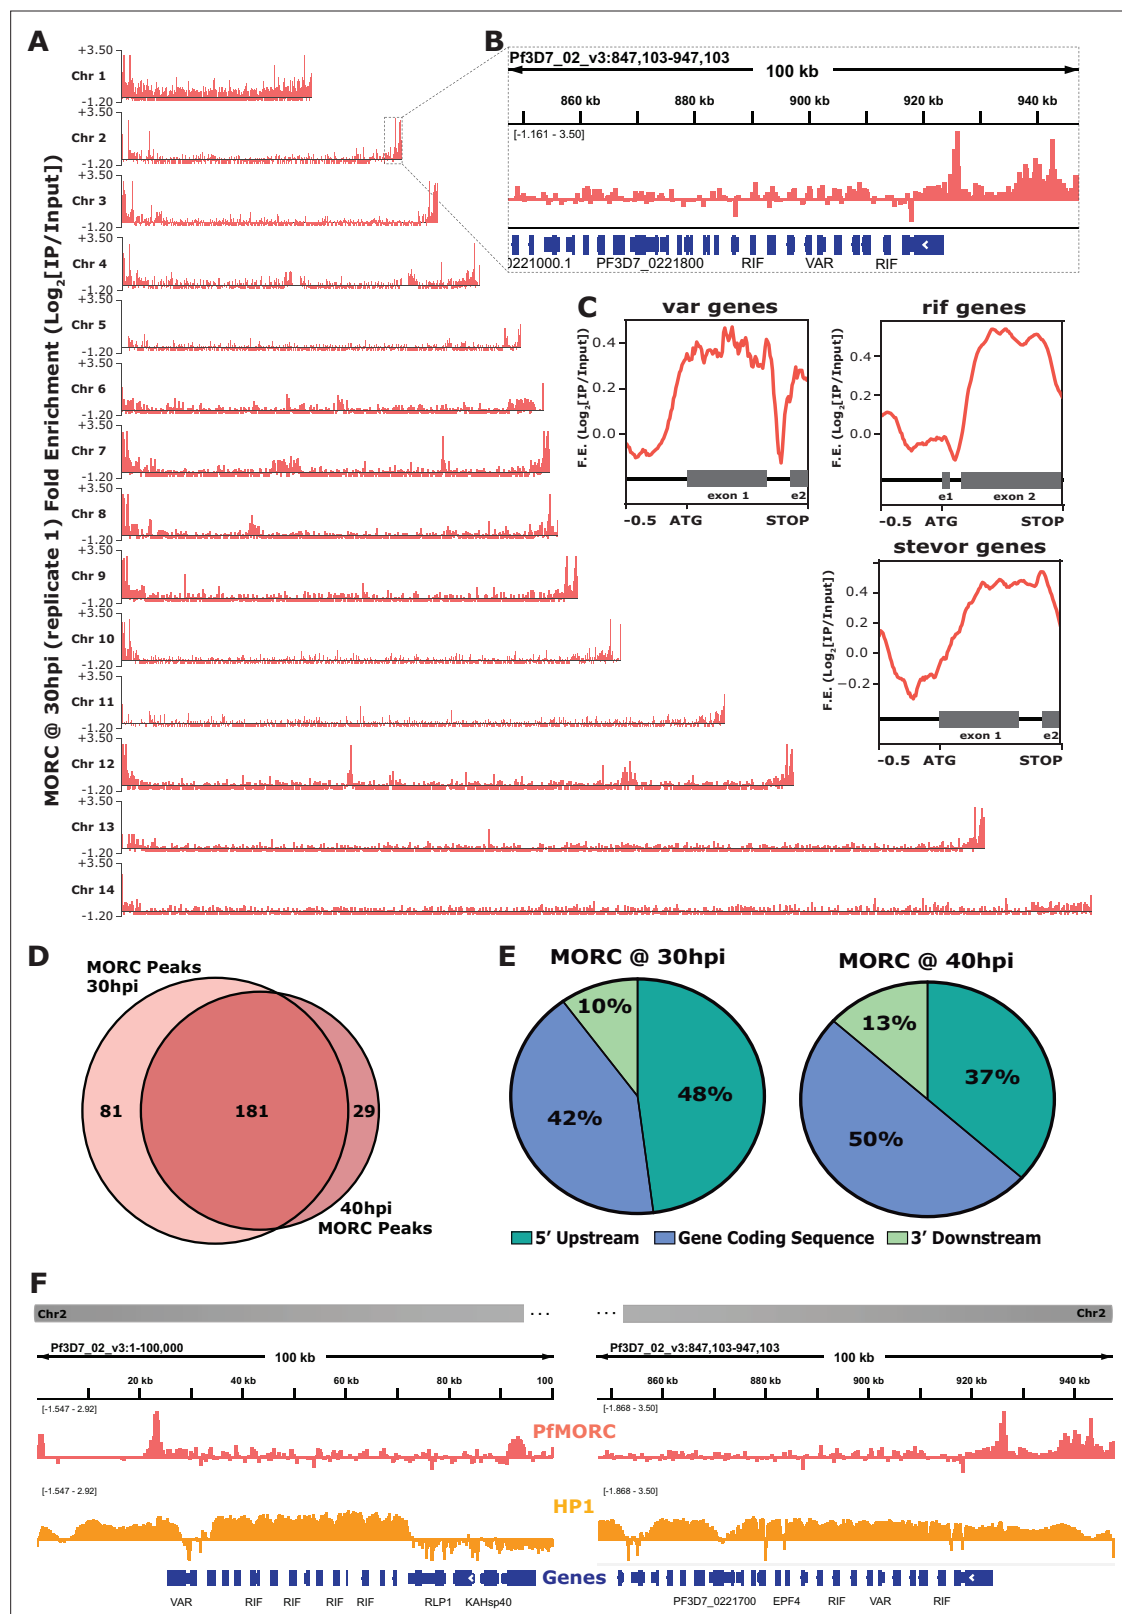

**Figure 2.** Genome-wide occupancy of PfMORC reveals localization to hypervariable surface antigen genes at 30 hr and 40 hr. **(A)** Coverage tracks of PfMORC across all 14 *P. falciparum* chromosomes. Plotted values are fold enrichment ( $\text{Log}_2[\text{IP}/\text{Input}]$ ) of a representative replicate at 30 hr. **(B)** Zoom-in of the last 100 kb region of chromosome two from **(A)**. Gene annotations represented in blue bars (*P. falciparum* 3D7 strain, version 3, release 57; PlasmoDB.org). **(C)** Mean fold enrichment of PfMORC occupancy across all *var* genes (top left), all *rif* genes (top right), and all *stevor* genes (bottom).

Figure 2 continued on next page

## Figure 2 continued

right), excluding pseudogenes. Graphical representation of exons to scale for each gene family annotated below enrichment plot in grey (e1 = exon one; e2 = exon two). **(D)** Quantitative Venn diagram comparing the number of MACS2 called peaks across each timepoint (light pink for 30 hr; dark pink for 40 hr). **(E)** Pie charts showing the type of genomic locations *Pf*MORC peaks overlap at both 30 hr and 40 hr. Pink slices are 5' regions upstream of the ATG start site of genes, blue slices are coding sequences/gene bodies of genes, and green slices are 3' regions downstream of the stop codon of genes. **(F)** Zoom-in of the first 100 kb region (left) and the last 100 kb region (right) of chromosome two. Plotted are the ChIP-seq fold enrichment of *Pf*MORC (top track; pink) and heterochromatin protein 1 (HP1; middle track; orange) with gene annotations (bottom track; blue bars; *P. falciparum* 3D7 strain, version 3, release 57; [PlasmoDB.org](https://plasmodb.org)).

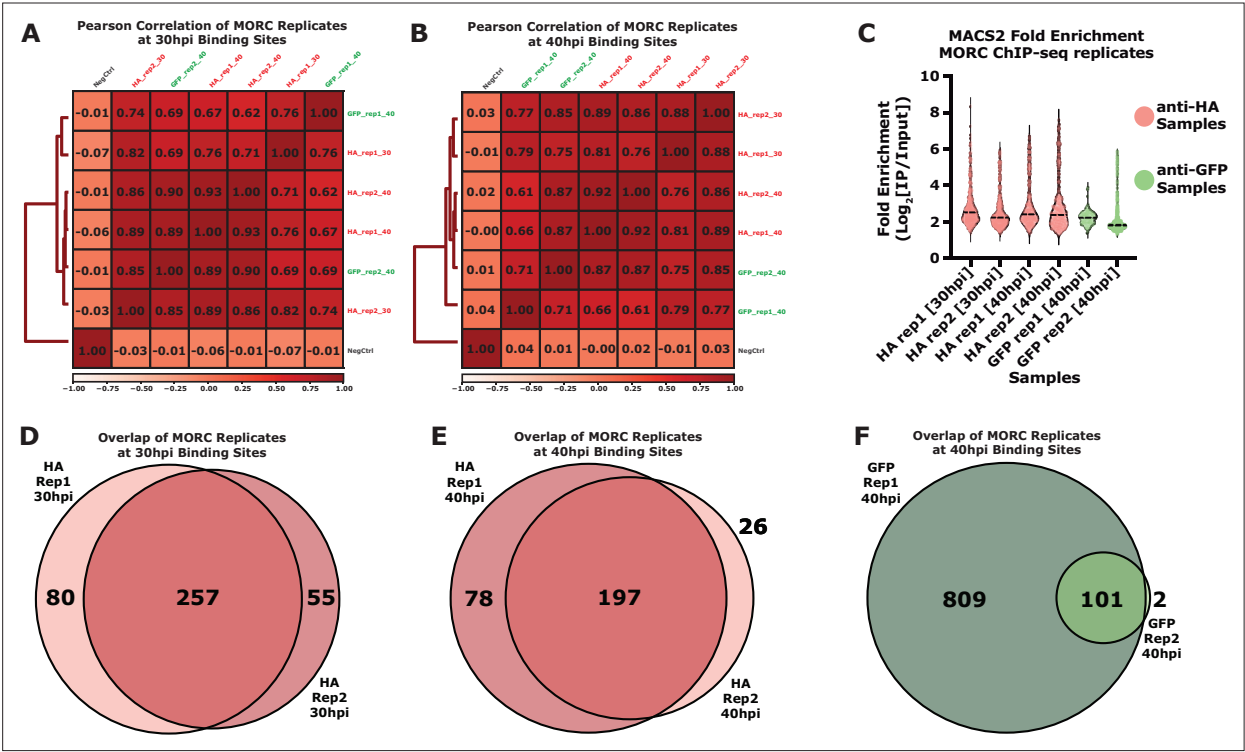

**Figure 2—figure supplement 1.** Comparison of ChIP-seq enriched peaks across different *PfMORC* samples. **(A)** Correlation plot (DeepTools PlotCorrelation) of the 30 hr samples compared to the negative control ChIP-seq sample. **(B)** Correlation plot (DeepTools PlotCorrelation) of the 40 hr samples compared to the negative control ChIP-seq sample. **(C)** Violin plot showing the ChIP-seq fold enrichment values of significantly called peaks in all six biological replicates. The two GFP samples were only used as additional controls for comparison purposes. **(D)** Venn diagram comparing the overlap of MACS2-called peaks between anti-HA biological replicates at 30 hr. **(E)** Venn diagram comparing the overlap of MACS2-called peaks between anti-HA biological replicates at 40 hr. **(F)** Venn diagram comparing the overlap of MACS2-called peaks between anti-GFP biological replicates at 40 hr.

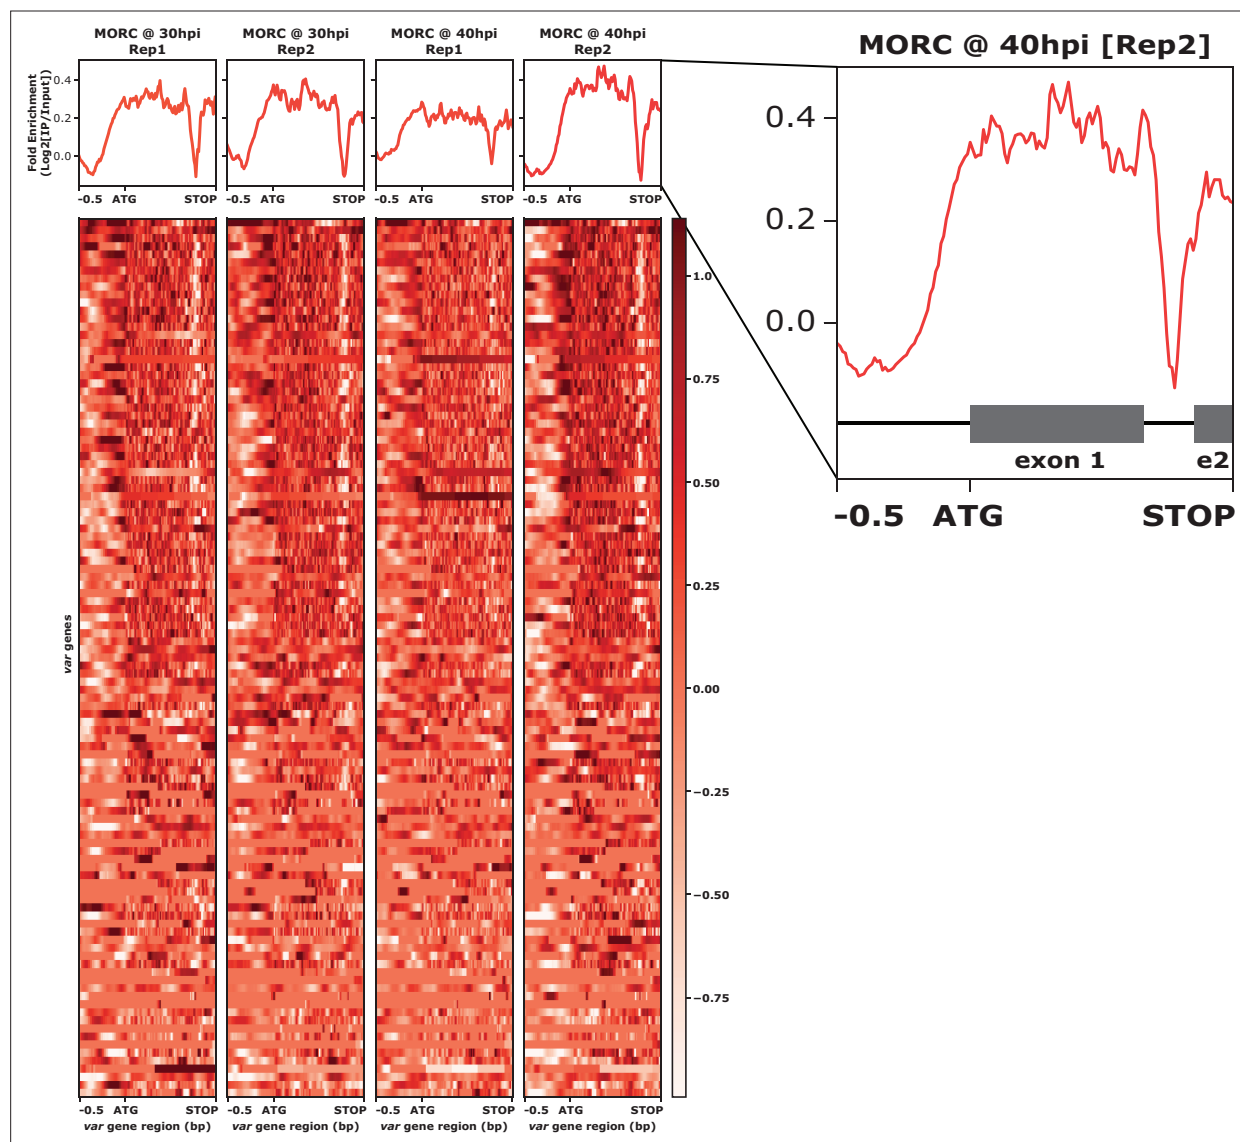

**Figure 2—figure supplement 2.** ChIP-seq profiling of PfMORC fold enrichment across var gene regions. (Top) Profile plot of the mean PfMORC ChIP-seq fold enrichment ( $\text{Log}_2[\text{IP}/\text{Input}]$ ) for all four samples across all *PfEMP1* (var) gene 5' upstream regions and gene bodies. (Bottom) Heatmap of the PfMORC ChIP-seq fold enrichment ( $\text{Log}_2[\text{IP}/\text{Input}]$ ) for all four samples across all *PfEMP1* (var) gene 5' upstream regions and gene bodies. (Inset to the right) Zoom-in on the average enrichment of PfMORC at var genes with annotated exons.

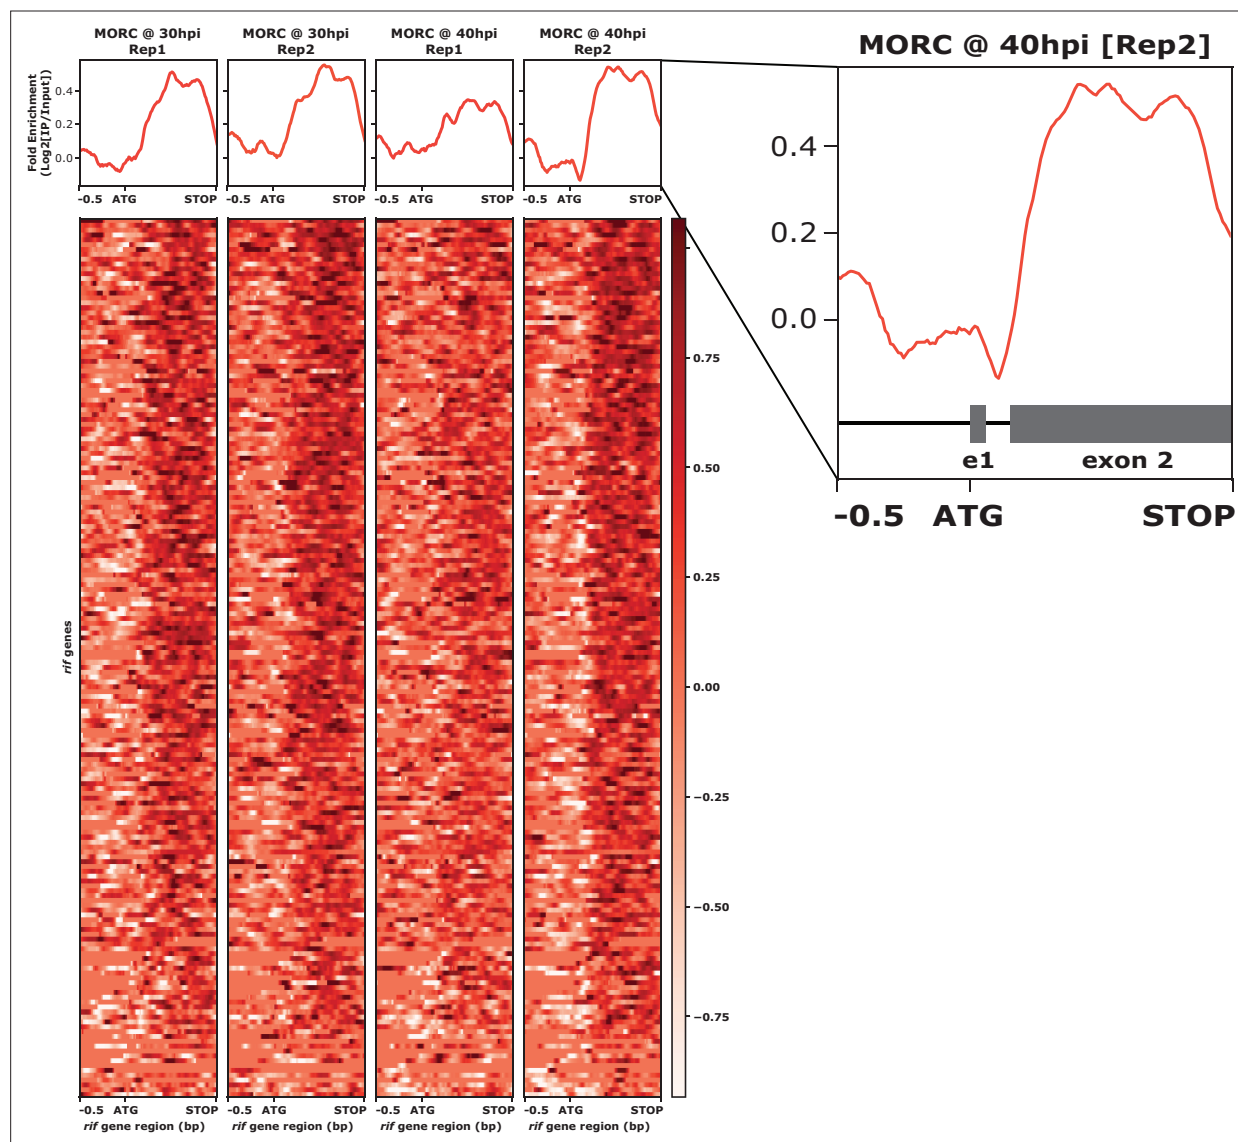

**Figure 2—figure supplement 3.** ChIP-seq profiling of PfMORC fold enrichment across *rif* gene regions. (Top) Profile plot of the mean PfMORC ChIP-seq fold enrichment (Log2[IP/Input]) for all four samples across all *rif* gene 5' upstream regions and gene bodies. (Bottom) Heatmap of the PfMORC ChIP-seq fold enrichment (Log2[IP/Input]) for all four samples across all *rif* gene 5' upstream regions and gene bodies. (Inset to the right) Zoom-in on the average enrichment of PfMORC at *rif* genes with annotated exons.



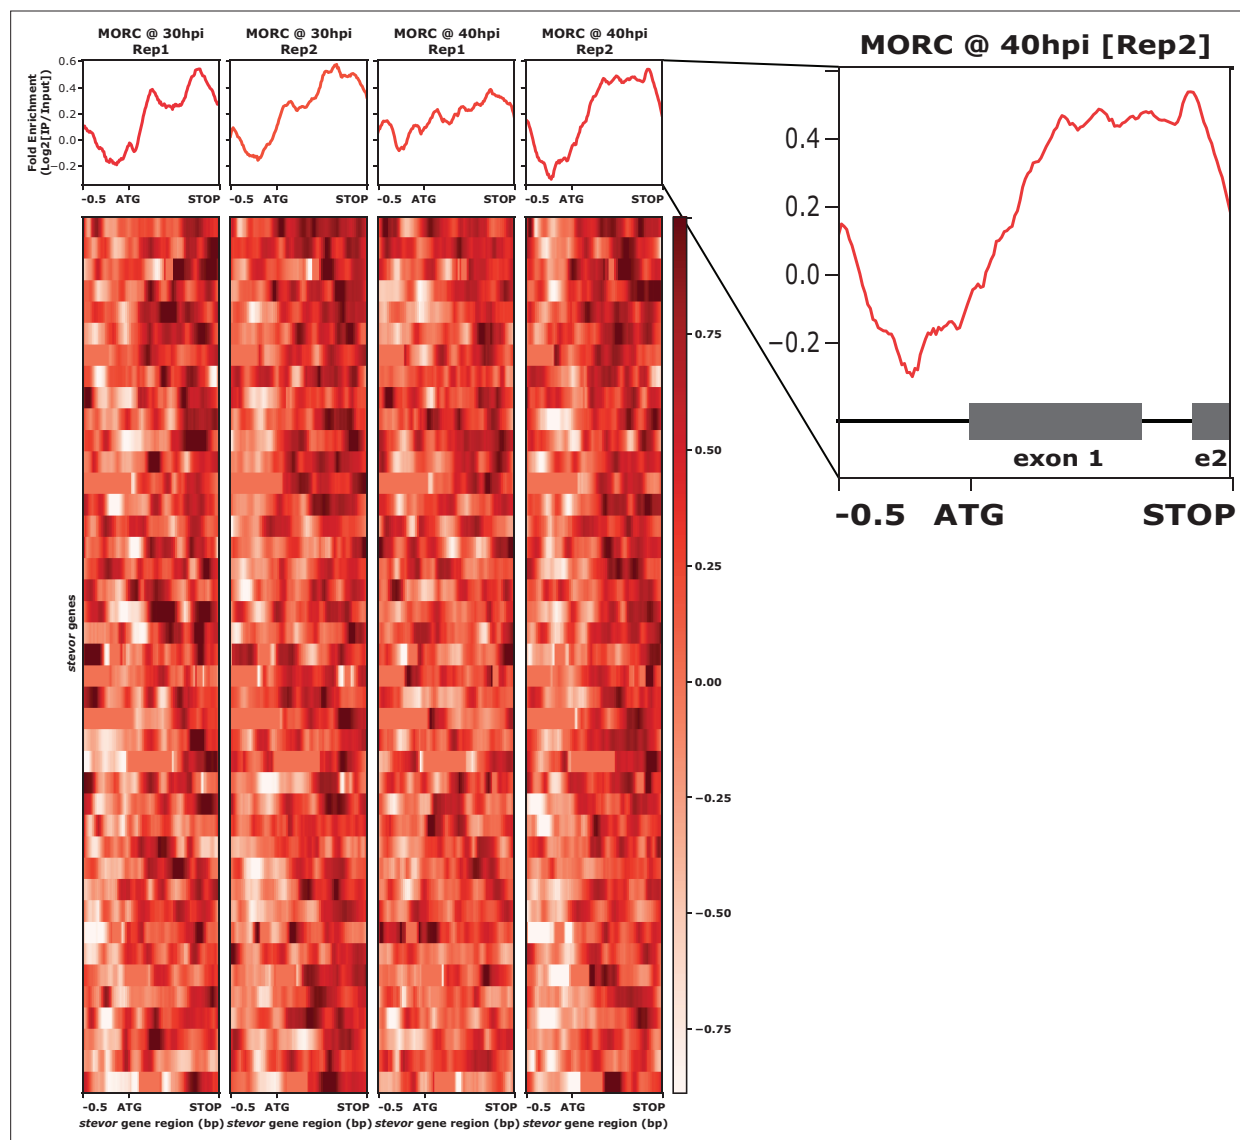

**Figure 2—figure supplement 4.** ChIP-seq profiling of PfMORC fold enrichment across stevor gene regions. (Top) Profile plot of the mean PfMORC ChIP-seq fold enrichment (Log2[IP/Input]) for all four samples across all *rif* gene 5' upstream regions and gene bodies. (Bottom) Heatmap of the PfMORC ChIP-seq fold enrichment (Log2[IP/Input]) for all four samples across all *rif* gene 5' upstream regions and gene bodies. (Inset to the right) Zoom-in on the average enrichment of PfMORC at *rif* genes with annotated exons.

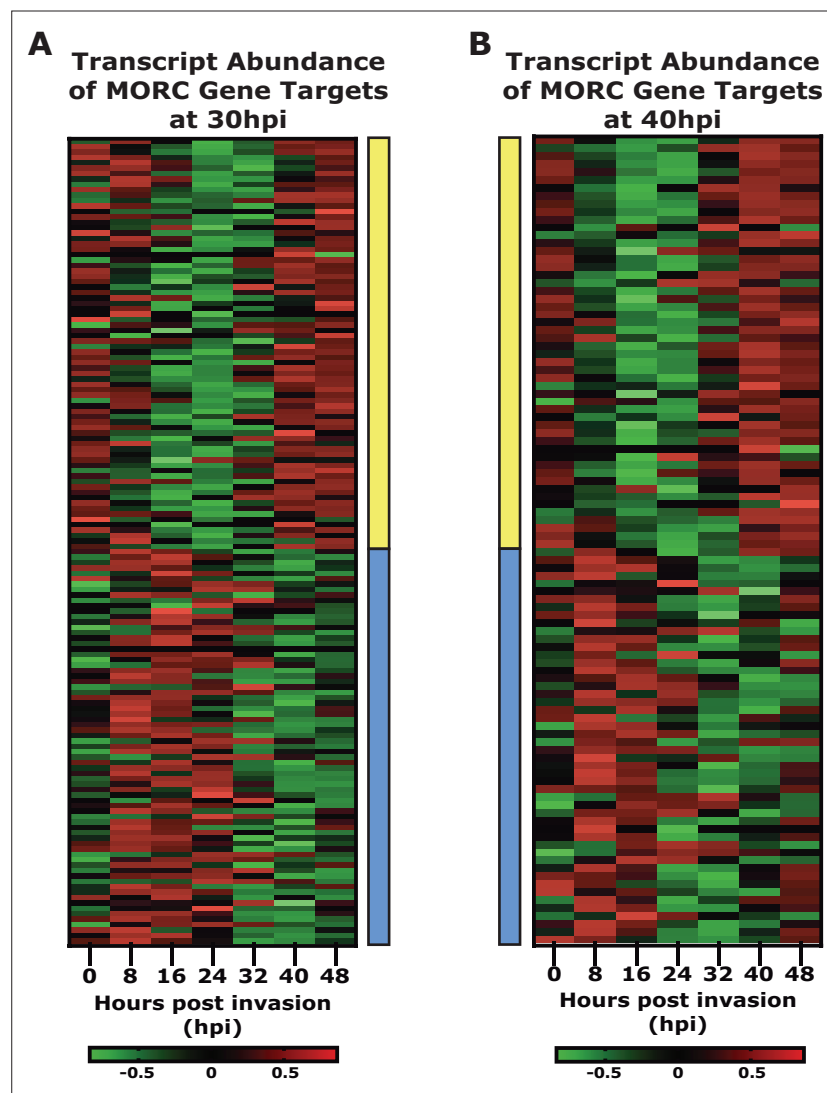

**Figure 2—figure supplement 5.** The heatmaps show the transcript abundance (Chappell *et al.*, 2020) of putative *Pf*MORC gene targets at 30 hr (A) and 40 hr (B). Red signifies high transcript abundance, and green signifies low transcript abundance. Both timepoints are organized into two major clusters (highlighted with the yellow bar and blue bar).

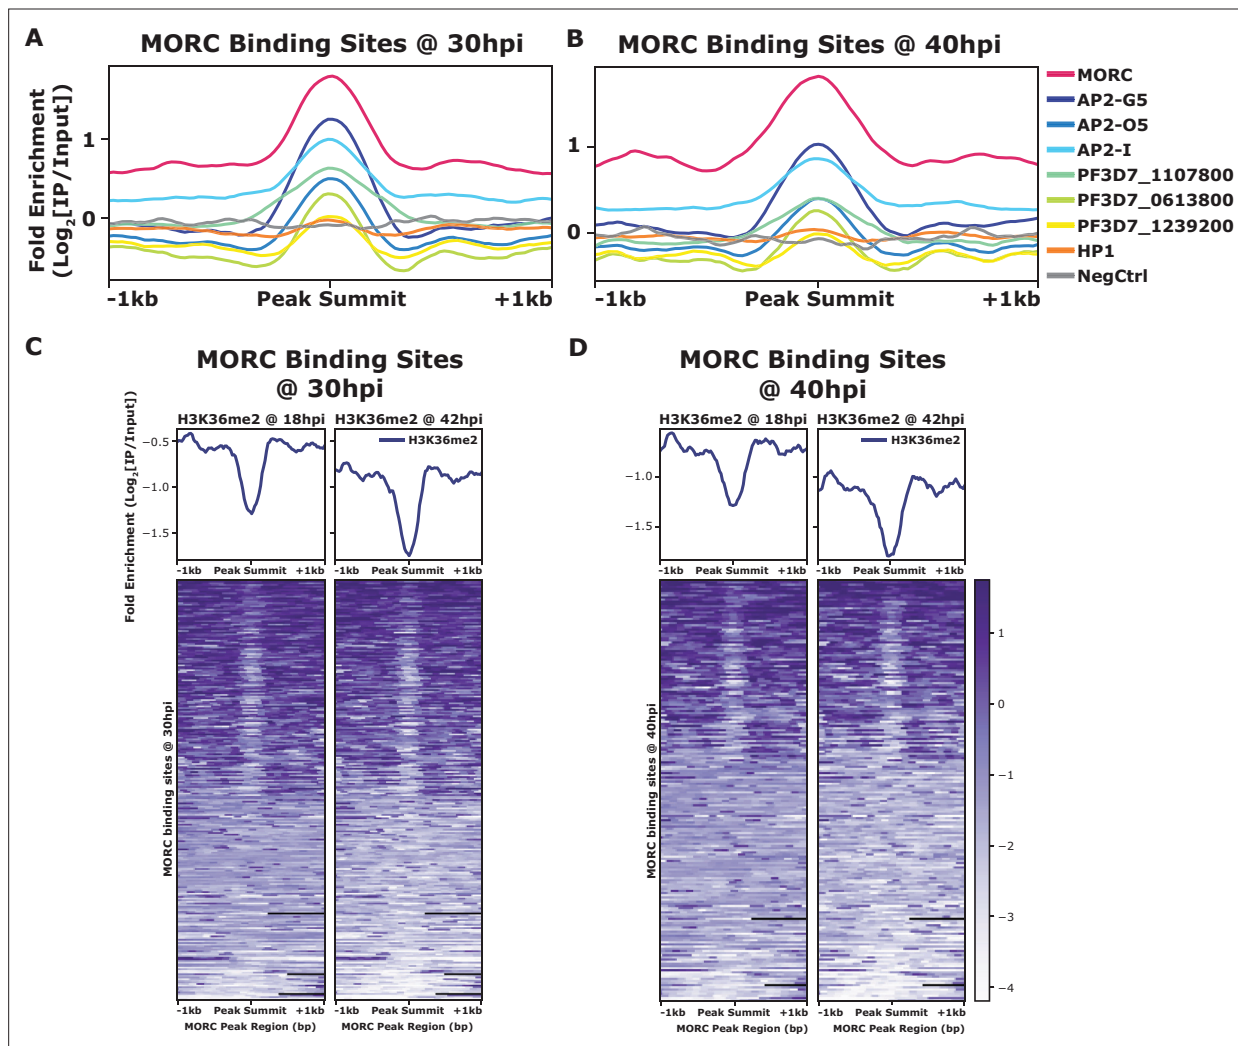

**Figure 3.** Comparison of mean fold enrichment of PfMORC with ApiAP2 transcription factors and other epigenetic markers at different time points. **(A)** Mean fold enrichment ( $\text{Log}_2[\text{IP}/\text{Input}]$ ) of PfMORC, six associated factors (AP2-G5, AP2-O5, AP2-I, PF3D7\_1107800, PF3D7\_0613800, and PF3D7\_1239200), HP1, and a negative no-epitope control across PfMORC binding sites at the 30 hr timepoint. **(B)** Mean fold enrichment ( $\text{Log}_2[\text{IP}/\text{Input}]$ ) of PfMORC, six associated factors (AP2-G5, AP2-O5, AP2-I, PF3D7\_1107800, PF3D7\_0613800, and PF3D7\_1239200), HP1, and a negative no-epitope control across PfMORC binding sites at the 40 hr timepoint. **(C)** Mean fold enrichment ( $\text{Log}_2[\text{IP}/\text{Input}]$ ) and heatmap of two H3K36me2 epigenetic mark timepoints across PfMORC binding sites at 30 hr. **(D)** Mean fold enrichment ( $\text{Log}_2[\text{IP}/\text{Input}]$ ) and heatmap of two H3K36me2 epigenetic mark timepoints across PfMORC binding sites at 40 hr.

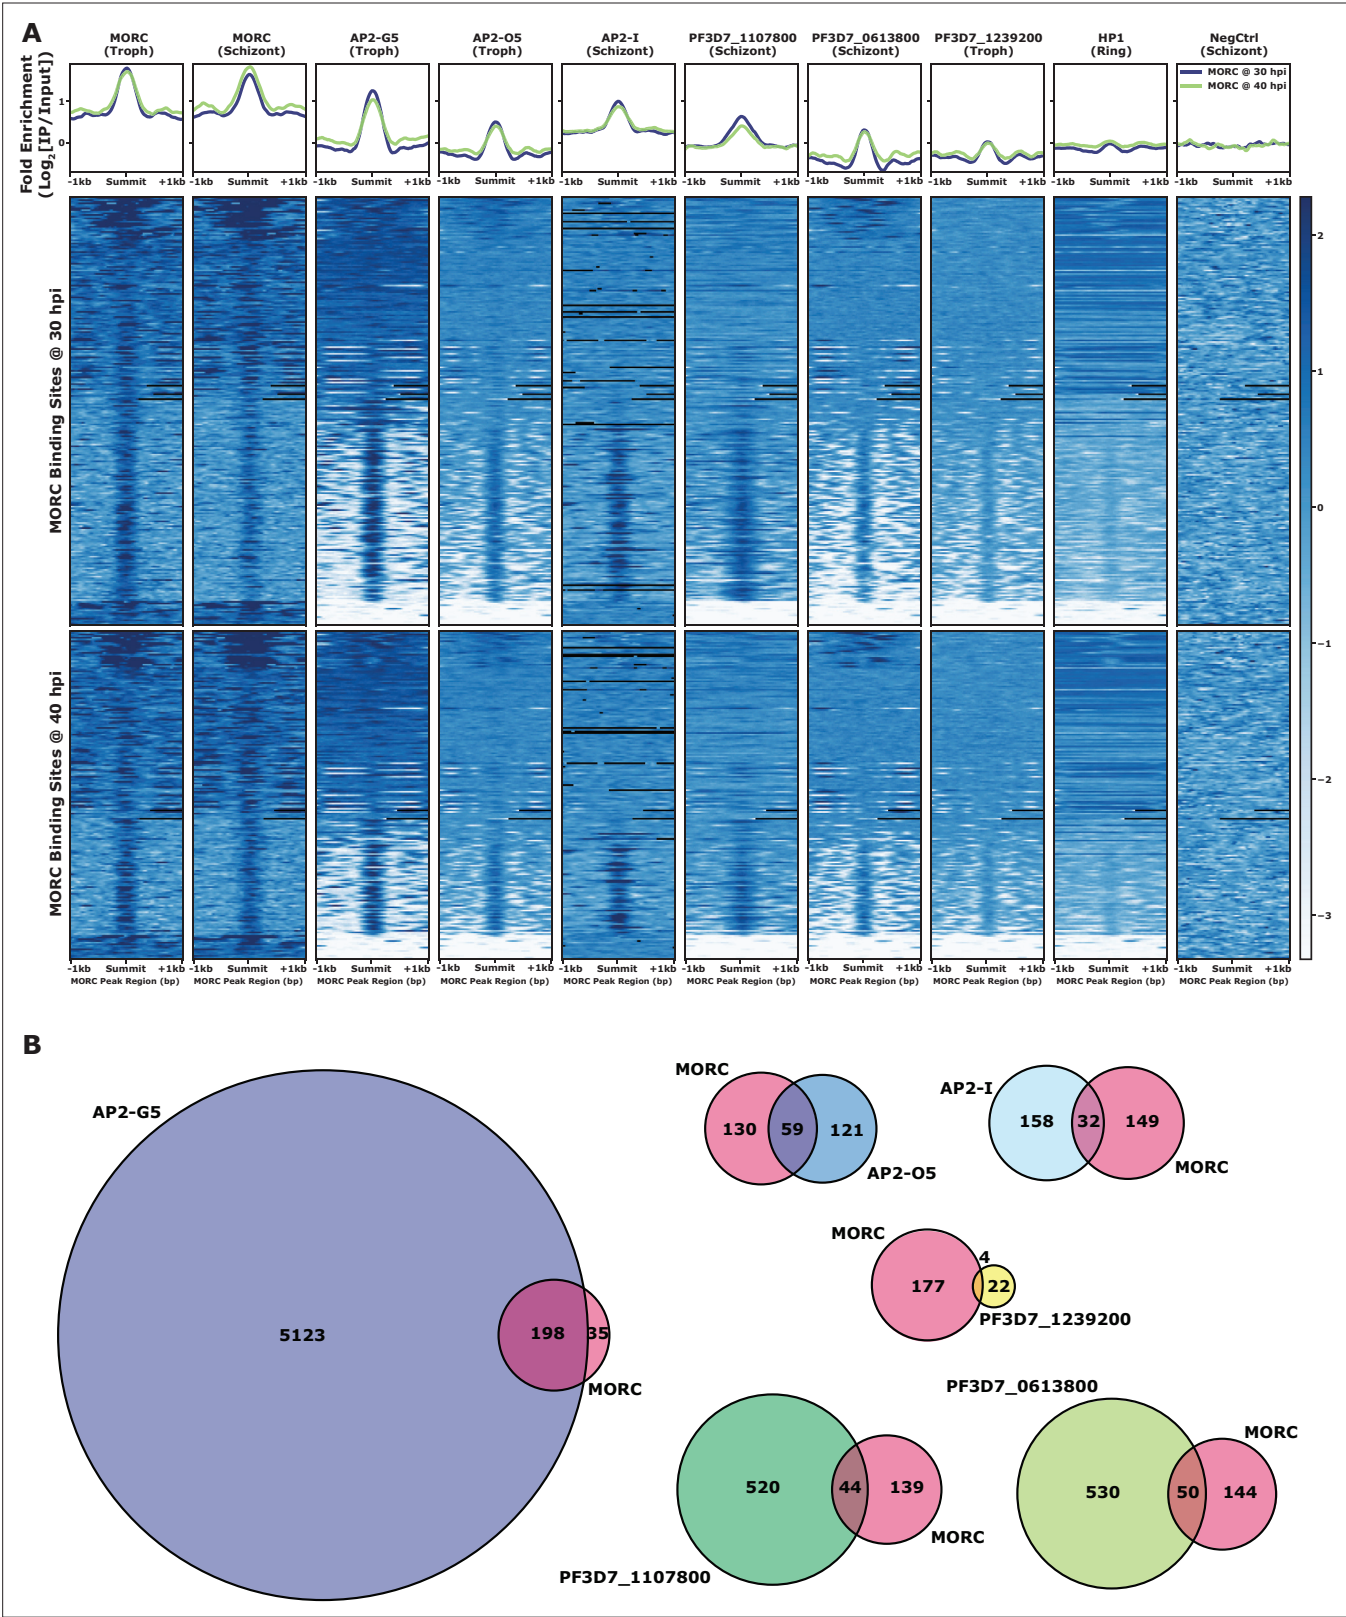

**Figure 3—figure supplement 1.** Overlap between *Pf*MORC and other ApiAP2 transcription factors binding regions. **(A)** Associated with **Figure 3A and B**. Mean fold enrichment (Log<sub>2</sub>[IP/Input]) summary plot (top) and full heatmap (bottom) of fold enrichment of *Pf*MORC, six associated ApiAP2 factors (AP2-G5, AP2-O5, AP2-I, PF3D7\_1107800, PF3D7\_0613800, and PF3D7\_1239200), HP1, and a negative no-epitope control across *Pf*MORC binding sites at the 30 hr and 40 hr timepoints. **(B)** Quantitative Venn diagrams of the binding site overlap between *Pf*MORC and the six associated ApiAP2 factors.

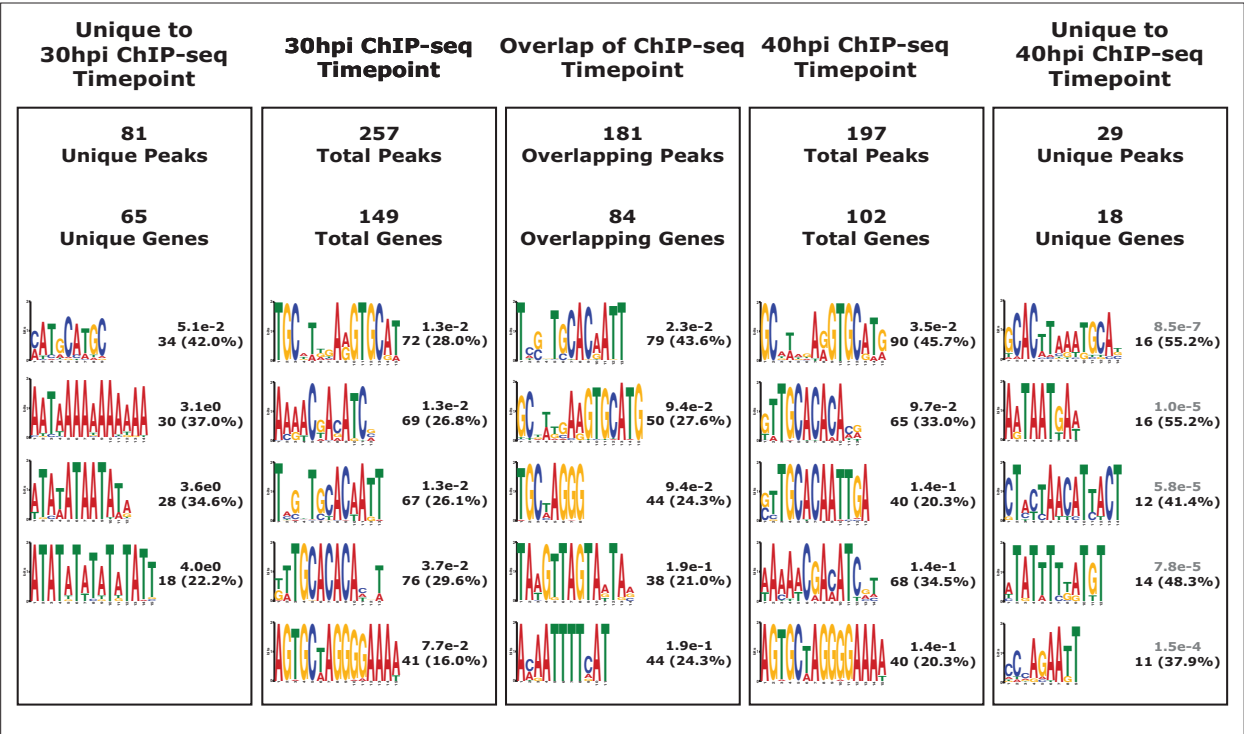

**Figure 3—figure supplement 2.** DNA motif analyses from these different categories: (1) unique to 30 hpi ChIP-seq timepoint, (2) 30 hpi ChIP-seq timepoint, (3) overlap of ChIP-seq timepoint, (4) 40 hpi ChIP-seq timepoint, and (5) unique to 30 hpi ChIP-seq timepoint. The values to the right of each motif contain the enrichment value, number of peaks containing that motif, and percent of the peaks the contain that motif calculated by Meme Suite.



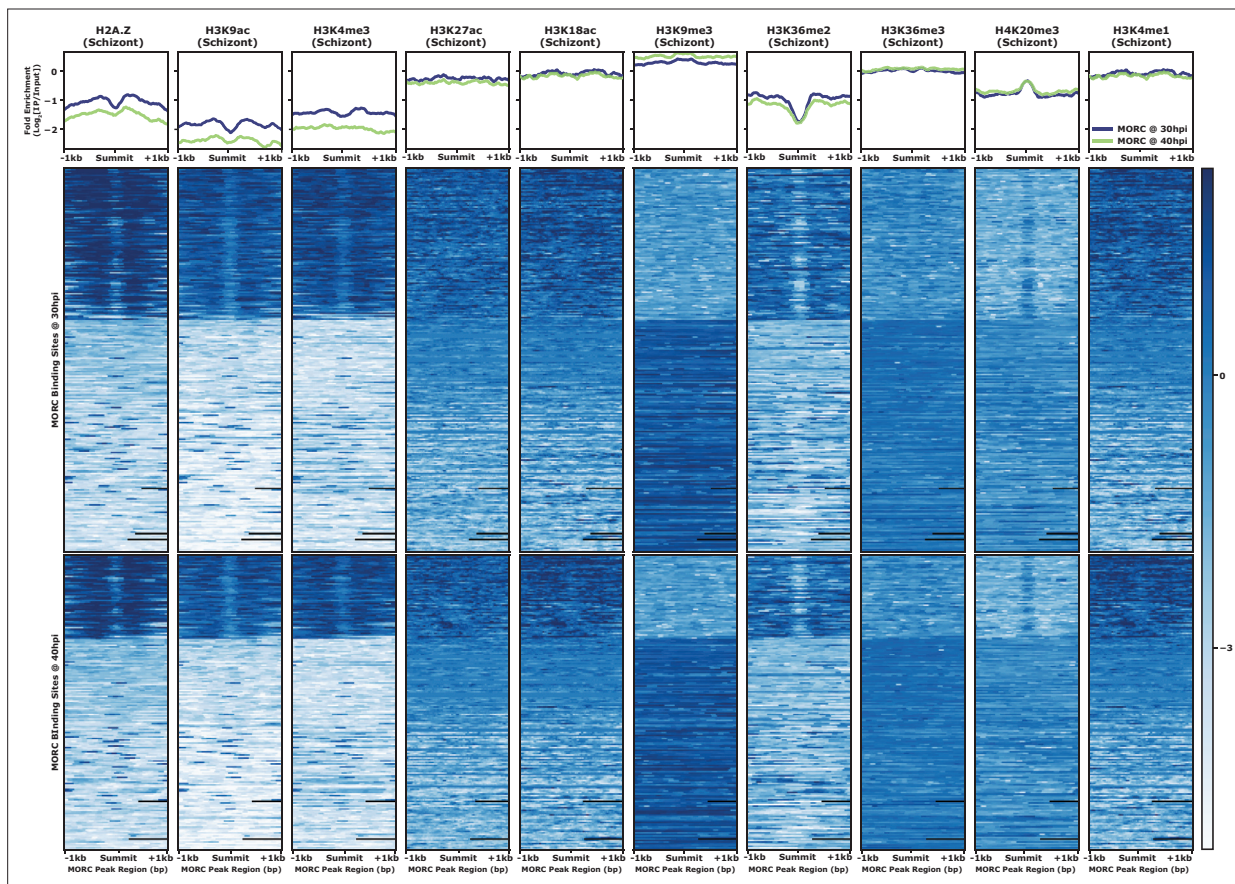

**Figure 3—figure supplement 3.** Mean fold enrichment (Log<sub>2</sub>[IP/Input]) summary plot (top) and full heatmap (bottom) of fold enrichment of 10 selected epigenetic marks (H2A.Z, H3K9ac, H3K4me3, H3K27ac, H3K18ac, H3K9me3, H3K36me2/3, H4K20me3, and H3K4me1) across *Pf*MORC binding sites at the 30 hr and 40 hr timepoints.

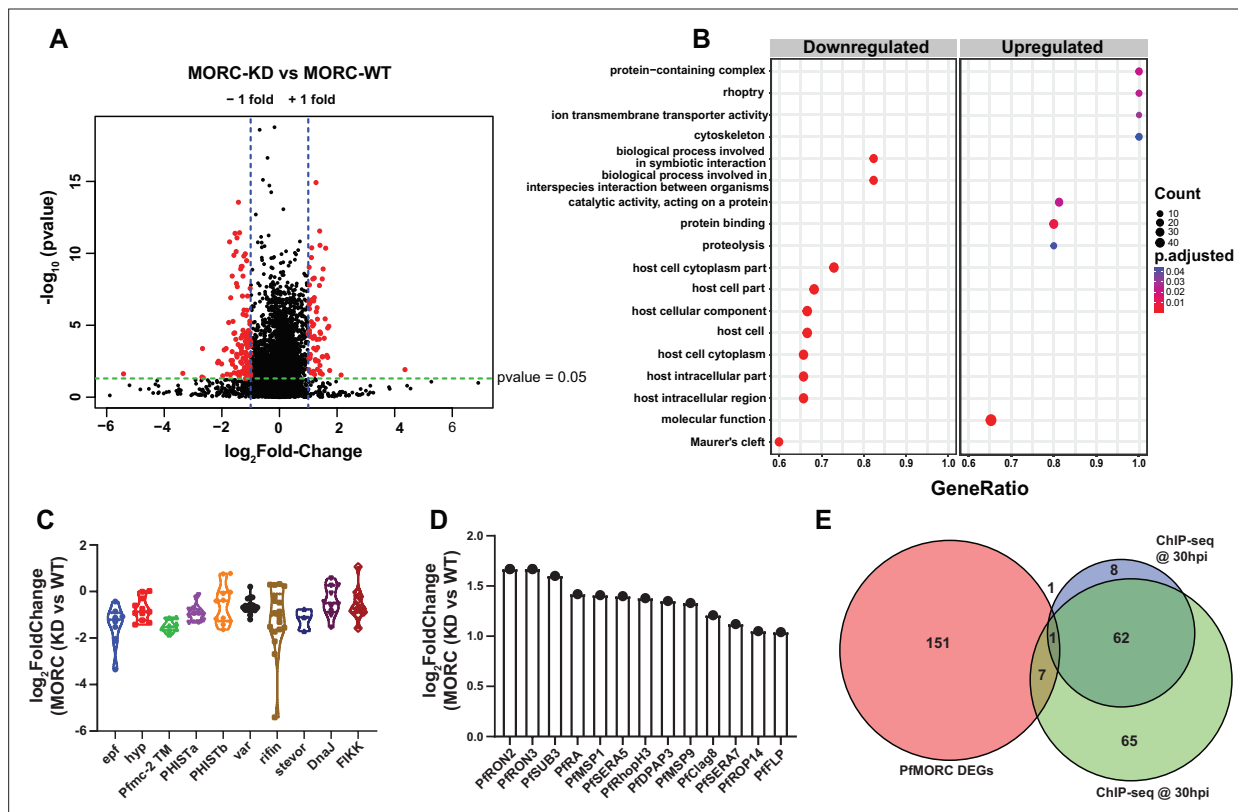

**Figure 4.** Transcriptome analysis of *PfMORC* knockdown revealed differential gene expression. **(A)** Volcano plot displaying the differential gene expression in *PfMORC*-KD compared to the *PfMORC*-WT phenotype. Tightly synchronized *PfMORC*<sup>HA-glmS</sup> parasites (32 hpi ± 3 hr) were split into two populations, one of which was treated with 2.5 mM GlcN to obtain the *PfMORC* knockdown phenotype and the other was not treated with GlcN to obtain wild-type phenotype. Total RNA-seq was performed, and significant threshold parameters for differentially expressed genes (DEGs) were assigned to a p-value <0.05 and -log<sub>2</sub> fold change >1 from three biological replicates. **(B)** Scatter plot shows upregulated and downregulated DEGs which were further categorized for pathway and functional enrichment analysis using the KEGG database (p-adjusted value <0.05). The circle size at the vertical axis represents the number of genes in the enriched pathways and the horizontal axis represents gene richness as a ratio of DEGs in the pathways to the total genes in a specific pathway. **(C)** The violin plot of log<sub>2</sub> fold change of genes belonging to the multigene family is constructed from *PfMORC*-KD vs. *PfMORC*-WT, which shows DEGs of multigene family proteins upon *PfMORC* knockdown. **(D)** The bar plot illustrates the upregulated DEGs of apical organelle origin in *PfMORC*-KD parasites involved in host cell invasion. **(E)** Venn diagram showing the comparison between genes obtained from ChIP-seq data and DEGs obtained from RNA-seq data. Both 30hpi and 40 hpi timepoints were taken for comparison and showed high overlap with each other but there was no overlap with RNA-seq data.

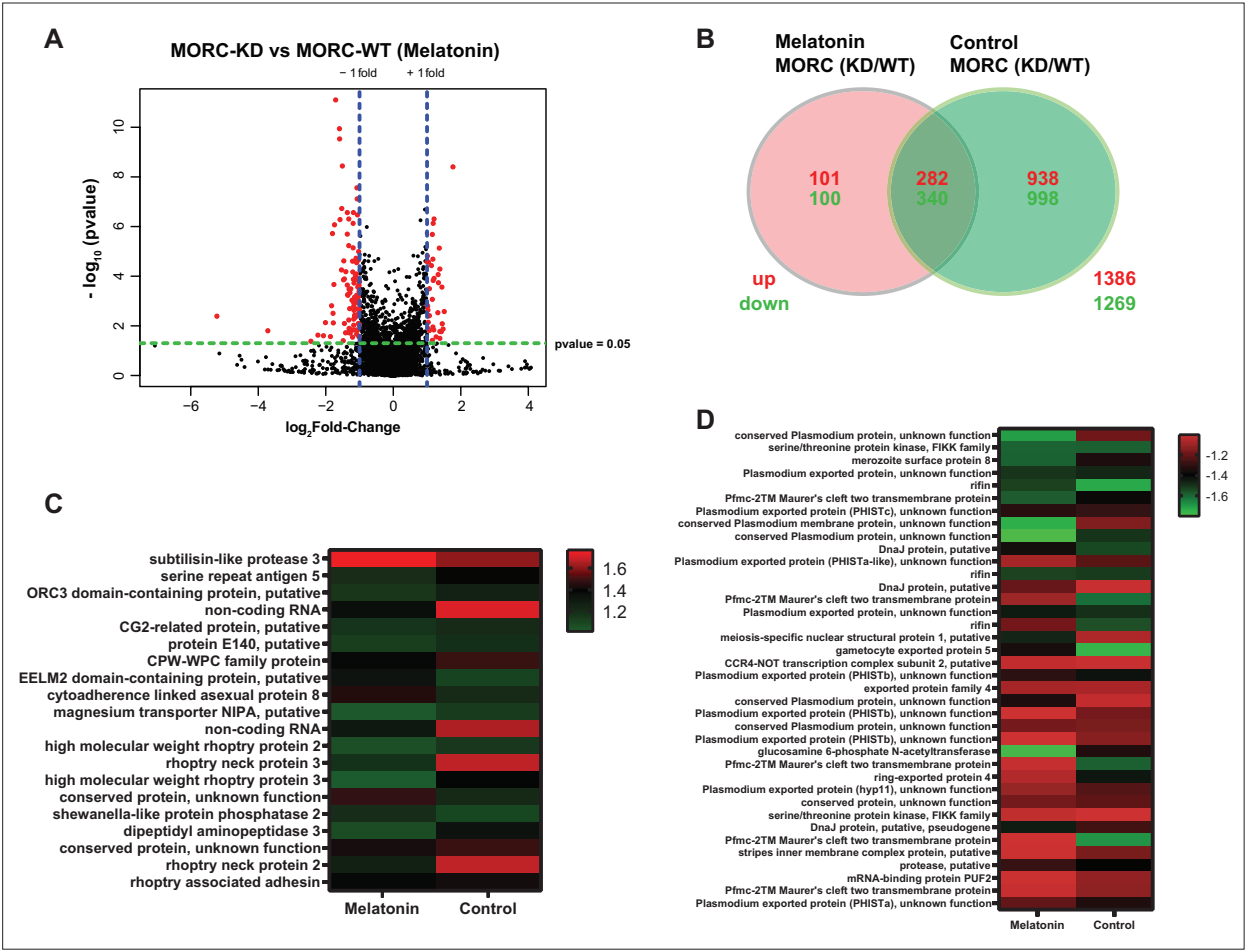

**Figure 4—figure supplement 1.** Comparison of transcriptional changes with melatonin treatment. **(A)** Volcano plot showing the differentially expressed genes in *Pf*MORC-KD parasites relative to *Pf*MORC-WT after 100 nM melatonin treatment for 5 hr from three independent experiments. **(B)** Venn diagram shows intersecting differentially expressed genes (DEGs) from the experiment with KD vs. WT with DEGs obtained from the experiment (KD vs. WT) treated with 100 nM melatonin for 5 hr. Number of DEGs is shown as up- (red) and downregulated (green). The intersecting region shows 282 upregulated and 340 downregulated genes. Heatmap showing significant DEGs based on p-values and log<sub>2</sub>FC for upregulating **(C)** and downregulating **(D)**. These genes are taken from 622 intersecting DEGs showing partial changes in expression after melatonin treatment.
