# Supplementary material for: A Plasmodium falciparum MORC protein complex modulates epigenetic control of gene expression through interaction with heterochromatin
Source: eLife. 2024 Oct 16;12:RP92201. doi: 10.7554/eLife.92201 (PMC11483127; doi:10.7554/eLife.92201)
Supplement: Supplementary file 1. [file elife-92201-supp1.xlsx]

## Sheet: CoIP_GFP
Supplementary File 1 - Intersecting peptide hits from 3 different experiments obtained from PfMORC-GFP parasite lysate.
Protein ID	Fasta headers
Q8IKF6	>tr|Q8IKF6|Q8IKF6_PLAF7 Uncharacterized protein OS=Plasmodium falciparum (isolate 3D7) GN=PF14_0649 PE=4 SV=1
Q8IDZ9	>tr|Q8IDZ9|Q8IDZ9_PLAF7 Isoleucine--tRNA ligase, putative OS=Plasmodium falciparum (isolate 3D7) GN=PF3D7_1332900 PE=3 SV=1;>tr|Q5KTV9|Q5KTV9_PLAFA Isoleucyl tRNA synthetase (Fragment) OS=Plasmodium falciparum PE=4 SV=1
Q8IB24	>tr|Q8IB24|Q8IB24_PLAF7 Heat shock protein 70 OS=Plasmodium falciparum (isolate 3D7) GN=PF3D7_0818900 PE=3 SV=1;>sp|P11144|HSP70_PLAFA Heat shock 70 kDa protein OS=Plasmodium falciparum PE=2 SV=2
Q8I3M5	>tr|Q8I3M5|Q8I3M5_PLAF7 Karyopherin beta OS=Plasmodium falciparum (isolate 3D7) GN=PF3D7_0524000 PE=4 SV=1;>tr|Q7KAU3|Q7KAU3_PLAFA Karyopherin beta OS=Plasmodium falciparum PE=4 SV=1
C0H5I7	>tr|C0H5I7|C0H5I7_PLAF7 T-complex protein 1 subunit delta OS=Plasmodium falciparum (isolate 3D7) GN=PF3D7_1357800 PE=3 SV=1
Q8IIJ8	>tr|Q8IIJ8|Q8IIJ8_PLAF7 Heat shock protein 101 OS=Plasmodium falciparum (isolate 3D7) GN=PF11_0175 PE=1 SV=1
Q8IKR1	>tr|Q8IKR1|Q8IKR1_PLAF7 V-type H(+)-translocating pyrophosphatase, putative OS=Plasmodium falciparum (isolate 3D7) GN=PF14_0541 PE=3 SV=1;>tr|O97154|O97154_PLAFA Proton-pumping vacuolar pyrophosphatase OS=Plasmodium falciparum GN=VP1 PE=3 SV=1
A0A143ZZ61	>tr|A0A143ZZ61|A0A143ZZ61_PLAF7 Enolase OS=Plasmodium falciparum (isolate 3D7) GN=PF3D7_1015900 PE=3 SV=1;>sp|Q8IJN7|ENO_PLAF7 Enolase OS=Plasmodium falciparum (isolate 3D7) GN=ENO PE=3 SV=1;>sp|Q27727|ENO_PLAFA Enolase OS=Plasmodium falciparum GN=ENO PE=3
Q8IAW0	>tr|Q8IAW0|Q8IAW0_PLAF7 Importin subunit alpha OS=Plasmodium falciparum (isolate 3D7) GN=PF3D7_0812400 PE=3 SV=1;>tr|Q7KAV0|Q7KAV0_PLAFA Importin subunit alpha OS=Plasmodium falciparum PE=3 SV=1
Q6LFH8	>sp|Q6LFH8|OAT_PLAF7 Ornithine aminotransferase OS=Plasmodium falciparum (isolate 3D7) GN=OAT PE=1 SV=1
Q8IC05	>tr|Q8IC05|Q8IC05_PLAF7 Heat shock protein 90 OS=Plasmodium falciparum (isolate 3D7) GN=PF3D7_0708400 PE=1 SV=1;>tr|Q25882|Q25882_PLAFA Heat shock protein 86 OS=Plasmodium falciparum GN=HSP86 PE=3 SV=1;>tr|Q25869|Q25869_PLAFA Heat-shock protein OS=Plasmodi
Q8I2U5	>tr|Q8I2U5|Q8I2U5_PLAF7 Inosine-5-monophosphate dehydrogenase OS=Plasmodium falciparum (isolate 3D7) GN=PF3D7_0920800 PE=3 SV=1;>tr|O96387|O96387_PLAFA Inosine-5-monophosphate dehydrogenase OS=Plasmodium falciparum PE=2 SV=1
Q8IJA9	>tr|Q8IJA9|Q8IJA9_PLAF7 Adenosine deaminase OS=Plasmodium falciparum (isolate 3D7) GN=PF10_0289 PE=4 SV=1;>tr|Q86GS5|Q86GS5_PLAFA Adenosine deaminase OS=Plasmodium falciparum PE=2 SV=1
Q8IDQ9	>tr|Q8IDQ9|Q8IDQ9_PLAF7 Phosphoethanolamine N-methyltransferase OS=Plasmodium falciparum (isolate 3D7) GN=PF3D7_1343000 PE=4 SV=1;>tr|Q6T755|Q6T755_PLAFA Phosphoethanolamine N-methyltransferase OS=Plasmodium falciparum GN=PMT PE=1 SV=1
Q8I5H4	>tr|Q8I5H4|Q8I5H4_PLAF7 Polyadenylate-binding protein OS=Plasmodium falciparum (isolate 3D7) GN=PF3D7_1224300 PE=3 SV=1;>tr|A1EAA0|A1EAA0_PLAFA Polyadenylate-binding protein OS=Plasmodium falciparum PE=2 SV=1
A0A143ZZ50	>tr|A0A143ZZ50|A0A143ZZ50_PLAF7 Cysteine--tRNA ligase, putative OS=Plasmodium falciparum (isolate 3D7) GN=PF3D7_1015200.3 PE=3 SV=1;>tr|A0A143ZXE7|A0A143ZXE7_PLAF7 Cysteine--tRNA ligase, putative OS=Plasmodium falciparum (isolate 3D7) GN=PF3D7_1015200.2 PE
Q8I2Z8	>tr|Q8I2Z8|Q8I2Z8_PLAF7 Probable ATP-dependent 6-phosphofructokinase OS=Plasmodium falciparum (isolate 3D7) GN=PF3D7_0915400 PE=3 SV=1
Q8IJC6	>tr|Q8IJC6|Q8IJC6_PLAF7 60S ribosomal protein L3 OS=Plasmodium falciparum (isolate 3D7) GN=PF10_0272 PE=1 SV=1
Q8I431	>tr|Q8I431|Q8I431_PLAF7 60S ribosomal protein L4 OS=Plasmodium falciparum (isolate 3D7) GN=PF3D7_0507100 PE=1 SV=1
C0H4V6	>tr|C0H4V6|C0H4V6_PLAF7 14-3-3 protein OS=Plasmodium falciparum (isolate 3D7) GN=PF3D7_0818200 PE=3 SV=1;>tr|O61132|O61132_PLAFA 14-3-3 protein (Fragment) OS=Plasmodium falciparum PE=3 SV=1
Q8I2X4	>tr|Q8I2X4|Q8I2X4_PLAF7 Heat shock protein 70 OS=Plasmodium falciparum (isolate 3D7) GN=PF3D7_0917900 PE=3 SV=1;>tr|Q07615|Q07615_PLAFA Heat shock protein OS=Plasmodium falciparum GN=Pfgrp PE=3 SV=1
A0A144A2J9	>tr|A0A144A2J9|A0A144A2J9_PLAF7 Hsp70/Hsp90 organizing protein OS=Plasmodium falciparum (isolate 3D7) GN=PF3D7_1434300 PE=4 SV=1;>sp|Q8ILC1|STI1L_PLAF7 STI1-like protein OS=Plasmodium falciparum (isolate 3D7) GN=PF14_0324 PE=4 SV=1
Q8IKF0	>tr|Q8IKF0|Q8IKF0_PLAF7 Eukaryotic initiation factor 4A OS=Plasmodium falciparum (isolate 3D7) GN=H45 PE=3 SV=1;>tr|Q2PZH3|Q2PZH3_PLAFA eIF4A-like OS=Plasmodium falciparum PE=2 SV=1
O96153	>tr|O96153|O96153_PLAF7 26S proteasome regulatory subunit RPN1,putative OS=Plasmodium falciparum (isolate 3D7) GN=PF3D7_0205900 PE=4 SV=3
Q8IC35	>tr|Q8IC35|Q8IC35_PLAF7 Erythrocyte membrane-associated antigen OS=Plasmodium falciparum (isolate 3D7) GN=PF3D7_0703500 PE=4 SV=2
A0A144A3T1	>tr|A0A144A3T1|A0A144A3T1_PLAF7 Fructose-bisphosphate aldolase OS=Plasmodium falciparum (isolate 3D7) GN=PF3D7_1444800 PE=3 SV=1;>sp|Q7KQL9|ALF_PLAF7 Fructose-bisphosphate aldolase OS=Plasmodium falciparum (isolate 3D7) GN=PF14_0425 PE=1 SV=1;>sp|P14223|AL
P27362	>sp|P27362|PGK_PLAF7 Phosphoglycerate kinase OS=Plasmodium falciparum (isolate 3D7) GN=PGK PE=1 SV=1
Q8IAX8	>tr|Q8IAX8|Q8IAX8_PLAF7 DNA/RNA-binding protein Alba 1 OS=Plasmodium falciparum (isolate 3D7) GN=PF3D7_0814200 PE=4 SV=1
Q8IJR9	>tr|Q8IJR9|Q8IJR9_PLAF7 GMP synthase [glutamine-hydrolyzing] OS=Plasmodium falciparum (isolate 3D7) GN=PF10_0123 PE=1 SV=1;>tr|Q9U775|Q9U775_PLAFA GMP synthetase OS=Plasmodium falciparum GN=GMPS PE=2 SV=1
O77310	>tr|O77310|O77310_PLAF7 Cytoadherence linked asexual protein 3.1 OS=Plasmodium falciparum (isolate 3D7) GN=PF3D7_0302500 PE=4 SV=2;>tr|A0A1W6IZJ1|A0A1W6IZJ1_PLAFA Clag3.1 OS=Plasmodium falciparum GN=clag3.1 PE=4 SV=1;>tr|B0M155|B0M155_PLAFA RhopH1/Clag3.1
C0H5H0	>tr|C0H5H0|C0H5H0_PLAF7 Heat shock protein 110, putative OS=Plasmodium falciparum (isolate 3D7) GN=PF3D7_1344200 PE=3 SV=1
Q8ILP6	>tr|Q8ILP6|Q8ILP6_PLAF7 Glycine--tRNA ligase OS=Plasmodium falciparum (isolate 3D7) GN=PF14_0198 PE=4 SV=2
Q8III6	>tr|Q8III6|Q8III6_PLAF7 Heat shock protein 90, putative OS=Plasmodium falciparum (isolate 3D7) GN=PF11_0188 PE=3 SV=1
C6KTA4	>tr|C6KTA4|C6KTA4_PLAF7 Pyruvate kinase OS=Plasmodium falciparum (isolate 3D7) GN=PF3D7_0626800 PE=1 SV=1
Q8IIV1	>tr|Q8IIV1|Q8IIV1_PLAF7 Histone H2B OS=Plasmodium falciparum (isolate 3D7) GN=PF11_0062 PE=3 SV=1;>tr|Q27717|Q27717_PLAFA Histone H2B OS=Plasmodium falciparum PE=2 SV=1
Q8IL11	>tr|Q8IL11|Q8IL11_PLAF7 M17 leucyl aminopeptidase OS=Plasmodium falciparum (isolate 3D7) GN=LAP PE=1 SV=1
Q8IIA4	>tr|Q8IIA4|Q8IIA4_PLAF7 Threonine--tRNA ligase OS=Plasmodium falciparum (isolate 3D7) GN=PF11_0270 PE=3 SV=1
Q8IKW5	>tr|Q8IKW5|Q8IKW5_PLAF7 Elongation factor 2 OS=Plasmodium falciparum (isolate 3D7) GN=PF14_0486 PE=4 SV=1;>tr|Q9NDT2|Q9NDT2_PLAFA Elongation factor 2 (Fragment) OS=Plasmodium falciparum PE=4 SV=1
Q8IEK1	>tr|Q8IEK1|Q8IEK1_PLAF7 M1-family alanyl aminopeptidase OS=Plasmodium falciparum (isolate 3D7) GN=PF3D7_1311800 PE=1 SV=1
Q7KQK6	>tr|Q7KQK6|Q7KQK6_PLAF7 GTP-binding nuclear protein OS=Plasmodium falciparum (isolate 3D7) GN=PF11_0183 PE=3 SV=1;>sp|P38545|RAN_PLAFA GTP-binding nuclear protein Ran OS=Plasmodium falciparum PE=2 SV=1
A0A144A4G4	>tr|A0A144A4G4|A0A144A4G4_PLAF7 Triosephosphate isomerase OS=Plasmodium falciparum (isolate 3D7) GN=PF3D7_1439900 PE=3 SV=1;>sp|Q7KQM0|TPIS_PLAF7 Triosephosphate isomerase OS=Plasmodium falciparum (isolate 3D7) GN=TPI PE=3 SV=1;>sp|Q07412|TPIS_PLAFA Triose
Q8IB03	>tr|Q8IB03|Q8IB03_PLAF7 Chaperone protein ClpB1 OS=Plasmodium falciparum (isolate 3D7) GN=PF3D7_0816600 PE=1 SV=1;>tr|O77222|O77222_PLAFA Heat shock protein hsp104 (Fragment) OS=Plasmodium falciparum GN=hsp104 PE=4 SV=1
C6KT18	>tr|C6KT18|C6KT18_PLAF7 Histone H2A OS=Plasmodium falciparum (isolate 3D7) GN=PF3D7_0617800 PE=3 SV=1;>sp|P40282|H2A_PLAFA Histone H2A OS=Plasmodium falciparum PE=2 SV=1
Q8I0P6	>tr|Q8I0P6|Q8I0P6_PLAF7 Elongation factor 1-alpha OS=Plasmodium falciparum (isolate 3D7) GN=PF3D7_1357000 PE=3 SV=1;>tr|A0A1C3KHD1|A0A1C3KHD1_PLAFA Elongation factor 1-alpha OS=Plasmodium falciparum GN=PowCR01_000088100 PE=3 SV=1
Q8I5C4	>tr|Q8I5C4|Q8I5C4_PLAF7 T-complex protein 1 subunit gamma OS=Plasmodium falciparum (isolate 3D7) GN=PF3D7_1229500 PE=3 SV=1
Q8IBV7	>tr|Q8IBV7|Q8IBV7_PLAF7 Histone H2B OS=Plasmodium falciparum (isolate 3D7) GN=PF3D7_0714000 PE=3 SV=1;>tr|A0A1C3KHG6|A0A1C3KHG6_PLAFA Histone H2B OS=Plasmodium falciparum GN=H2B.Z PE=3 SV=1
Q8I0V4	>tr|Q8I0V4|Q8I0V4_PLAF7 Endoplasmin homolog, putative OS=Plasmodium falciparum (isolate 3D7) GN=PF3D7_1222300 PE=1 SV=1
A0A144A1B3	>tr|A0A144A1B3|A0A144A1B3_PLAF7 Protein SEY1 homolog OS=Plasmodium falciparum (isolate 3D7) GN=PF3D7_1416100 PE=3 SV=1;>sp|Q8ILT5|SEY1_PLAF7 Protein SEY1 homolog OS=Plasmodium falciparum (isolate 3D7) GN=PF14_0159 PE=3 SV=2
Q8IJS7	>tr|Q8IJS7|Q8IJS7_PLAF7 PRE-binding protein OS=Plasmodium falciparum (isolate 3D7) GN=PF10_0115 PE=4 SV=1
Q8I2B1	>tr|Q8I2B1|Q8I2B1_PLAF7 Aspartate--tRNA ligase OS=Plasmodium falciparum (isolate 3D7) GN=PF3D7_0102900 PE=3 SV=1
O77323	>sp|O77323|TCPH_PLAF7 T-complex protein 1 subunit eta OS=Plasmodium falciparum (isolate 3D7) GN=MAL3P3.6 PE=3 SV=1
C6KT34	>tr|C6KT34|C6KT34_PLAF7 Cell division cycle protein 48 homologue,putative OS=Plasmodium falciparum (isolate 3D7) GN=PF3D7_0619400 PE=4 SV=1
P50250	>sp|P50250|SAHH_PLAF7 Adenosylhomocysteinase OS=Plasmodium falciparum (isolate 3D7) GN=PFE1050w PE=1 SV=2
Q8IJN9	>tr|Q8IJN9|Q8IJN9_PLAF7 Heat shock protein 60 OS=Plasmodium falciparum (isolate 3D7) GN=PF10_0153 PE=3 SV=1;>tr|Q27723|Q27723_PLAFA 60 kDa heat-shock protein PfHsp60 OS=Plasmodium falciparum PE=2 SV=1
Q8IDK7	>tr|Q8IDK7|Q8IDK7_PLAF7 Glutamate--tRNA ligase, putative OS=Plasmodium falciparum (isolate 3D7) GN=PF3D7_1349200 PE=3 SV=1
Q8I3Y8	>tr|Q8I3Y8|Q8I3Y8_PLAF7 Inositol-3-phosphate synthase OS=Plasmodium falciparum (isolate 3D7) GN=PF3D7_0511800 PE=4 SV=1
Q8II43	>tr|Q8II43|Q8II43_PLAF7 T-complex protein 1 subunit alpha OS=Plasmodium falciparum (isolate 3D7) GN=PF11_0331 PE=3 SV=1
Q8ILR7	>tr|Q8ILR7|Q8ILR7_PLAF7 DNA helicase OS=Plasmodium falciparum (isolate 3D7) GN=PF14_0177 PE=3 SV=1;>tr|Q9GR05|Q9GR05_PLAFA DNA helicase OS=Plasmodium falciparum GN=mcm2 PE=3 SV=1
Q76NM6	>sp|Q76NM6|VATA_PLAF7 V-type proton ATPase catalytic subunit A OS=Plasmodium falciparum (isolate 3D7) GN=vapA PE=1 SV=1;>sp|Q03498|VATA_PLAFA V-type proton ATPase catalytic subunit A OS=Plasmodium falciparum GN=vapA PE=3 SV=1
Q8I395	>tr|Q8I395|Q8I395_PLAF7 High molecular weight rhoptry protein 3 OS=Plasmodium falciparum (isolate 3D7) GN=PF3D7_0905400 PE=4 SV=1;>tr|B0M166|B0M166_PLAFA RhopH3 OS=Plasmodium falciparum GN=rhoph3 PE=4 SV=1;>tr|B0M159|B0M159_PLAFA RhopH3 OS=Plasmodium falci
Q8ILA4	>tr|Q8ILA4|Q8ILA4_PLAF7 Glucose-6-phosphate isomerase OS=Plasmodium falciparum (isolate 3D7) GN=PF14_0341 PE=1 SV=1;>sp|P18240|G6PI_PLAFA Glucose-6-phosphate isomerase OS=Plasmodium falciparum GN=GGI.R1 PE=3 SV=1
Q8IB72	>tr|Q8IB72|Q8IB72_PLAF7 DnaJ protein, putative OS=Plasmodium falciparum (isolate 3D7) GN=PF3D7_0823800 PE=4 SV=1
Q8IDF0	>tr|Q8IDF0|Q8IDF0_PLAF7 DNA helicase OS=Plasmodium falciparum (isolate 3D7) GN=PF3D7_1355100 PE=3 SV=1
C6KST5	>tr|C6KST5|C6KST5_PLAF7 T-complex protein 1 subunit zeta OS=Plasmodium falciparum (isolate 3D7) GN=PF3D7_0608700 PE=3 SV=1
C0H551	>tr|C0H551|C0H551_PLAF7 Glutamine synthetase, putative OS=Plasmodium falciparum (isolate 3D7) GN=PF3D7_0922600 PE=3 SV=1
Q8IJR2	>tr|Q8IJR2|Q8IJR2_PLAF7 Uncharacterized protein OS=Plasmodium falciparum (isolate 3D7) GN=PF10_0130 PE=4 SV=1
Q8I2G1	>tr|Q8I2G1|Q8I2G1_PLAF7 Ring-exported protein 1 OS=Plasmodium falciparum (isolate 3D7) GN=PF3D7_0935900 PE=4 SV=1;>tr|Q8MPL1|Q8MPL1_PLAFA Putative uncharacterized protein Dd2-3.5 OS=Plasmodium falciparum GN=Dd2-3.5 PE=2 SV=1
Q8IL94	>tr|Q8IL94|Q8IL94_PLAF7 Ribonucleoside-diphosphate reductase OS=Plasmodium falciparum (isolate 3D7) GN=PF14_0352 PE=3 SV=1
Q8I5M2	>tr|Q8I5M2|Q8I5M2_PLAF7 Arginine--tRNA ligase, putative OS=Plasmodium falciparum (isolate 3D7) GN=PF3D7_1218600 PE=1 SV=1
Q8II01	>tr|Q8II01|Q8II01_PLAF7 Tudor staphylococcal nuclease OS=Plasmodium falciparum (isolate 3D7) GN=TSN PE=4 SV=1
Q8IKH8	>tr|Q8IKH8|Q8IKH8_PLAF7 40S ribosomal protein S3 OS=Plasmodium falciparum (isolate 3D7) GN=PF14_0627 PE=1 SV=1
Q8ILL2	>tr|Q8ILL2|Q8ILL2_PLAF7 60S ribosomal protein L7-3, putative OS=Plasmodium falciparum (isolate 3D7) GN=PF14_0231 PE=1 SV=2
O96198	>tr|O96198|O96198_PLAF7 Asparagine--tRNA ligase OS=Plasmodium falciparum (isolate 3D7) GN=PF3D7_0211800 PE=3 SV=1
Q8I2J3	>tr|Q8I2J3|Q8I2J3_PLAF7 M18 aspartyl aminopeptidase OS=Plasmodium falciparum (isolate 3D7) GN=PF3D7_0932300 PE=1 SV=1
Q8IAY9	>tr|Q8IAY9|Q8IAY9_PLAF7 Importin beta, putative OS=Plasmodium falciparum (isolate 3D7) GN=PF3D7_0815200 PE=4 SV=1
Q8I3T9	>tr|Q8I3T9|Q8I3T9_PLAF7 60S ribosomal protein L2 OS=Plasmodium falciparum (isolate 3D7) GN=PF3D7_0516900 PE=1 SV=1;>tr|A0A1C3KJQ5|A0A1C3KJQ5_PLAFA 60S ribosomal protein L2, putative OS=Plasmodium falciparum GN=RPL2 PE=4 SV=1
Q8ILI9	>tr|Q8ILI9|Q8ILI9_PLAF7 DNA mismatch repair protein MSH2, putative OS=Plasmodium falciparum (isolate 3D7) GN=PF14_0254 PE=4 SV=1;>tr|Q86G84|Q86G84_PLAFA DNA mismatch repair enzyme OS=Plasmodium falciparum GN=MutS PE=4 SV=1
Q8I4Y9	>tr|Q8I4Y9|Q8I4Y9_PLAF7 N-alpha-acetyltransferase 15, NatA auxiliary subunit, putative OS=Plasmodium falciparum (isolate 3D7) GN=PF3D7_1244100 PE=4 SV=1
Q8I5Y3	>tr|Q8I5Y3|Q8I5Y3_PLAF7 Eukaryotic translation initiation factor 3 subunit C OS=Plasmodium falciparum (isolate 3D7) GN=PF3D7_1206200 PE=3 SV=1
Q8II72	>tr|Q8II72|Q8II72_PLAF7 Parasitophorous vacuolar protein 1 OS=Plasmodium falciparum (isolate 3D7) GN=PF11_0302 PE=4 SV=1
Q8ILL3	>tr|Q8ILL3|Q8ILL3_PLAF7 60S ribosomal protein L5, putative OS=Plasmodium falciparum (isolate 3D7) GN=PF14_0230 PE=1 SV=1
Q8IM66	>tr|Q8IM66|Q8IM66_PLAF7 26S proteasome regulatory subunit RPN6 OS=Plasmodium falciparum (isolate 3D7) GN=PF14_0025 PE=4 SV=1
C0H4L1	>tr|C0H4L1|C0H4L1_PLAF7 Importin-7, putative OS=Plasmodium falciparum (isolate 3D7) GN=PF3D7_0706000 PE=4 SV=1
Q8I1N6	>sp|Q8I1N6|AP2A_PLAF7 AP2/ERF domain-containing protein PFD0985w OS=Plasmodium falciparum (isolate 3D7) GN=PFD0985w PE=1 SV=2
Q8IKL5	>tr|Q8IKL5|Q8IKL5_PLAF7 Valine--tRNA ligase, putative OS=Plasmodium falciparum (isolate 3D7) GN=PF14_0589 PE=3 SV=1;>tr|Q5KTV3|Q5KTV3_PLAFA Valyl tRNA synthetase (Fragment) OS=Plasmodium falciparum PE=4 SV=1
O96236	>tr|O96236|O96236_PLAF7 DNA-directed RNA polymerase subunit beta OS=Plasmodium falciparum (isolate 3D7) GN=PF3D7_0215700 PE=3 SV=3
Q8IJ60	>tr|Q8IJ60|Q8IJ60_PLAF7 Methionine--tRNA ligase OS=Plasmodium falciparum (isolate 3D7) GN=PF10_0340 PE=3 SV=1
Q8I492	>tr|Q8I492|Q8I492_PLAF7 Mature parasite-infected erythrocyte surface antigen OS=Plasmodium falciparum (isolate 3D7) GN=PF3D7_0500800 PE=4 SV=1;>tr|Q9NB35|Q9NB35_PLAFA Mature parasite-infected erythrocyte surface antigen OS=Plasmodium falciparum GN=MESA PE=
Q8I0V3	>tr|Q8I0V3|Q8I0V3_PLAF7 60 kDa chaperonin OS=Plasmodium falciparum (isolate 3D7) GN=PF3D7_1232100 PE=3 SV=2
Q8I3T1	>tr|Q8I3T1|Q8I3T1_PLAF7 Eukaryotic translation initiation factor 3 subunit B OS=Plasmodium falciparum (isolate 3D7) GN=PF3D7_0517700 PE=3 SV=1
Q8IEN3	>tr|Q8IEN3|Q8IEN3_PLAF7 Carbamoyl phosphate synthetase OS=Plasmodium falciparum (isolate 3D7) GN=PF3D7_1308200 PE=4 SV=1;>tr|Q27732|Q27732_PLAFA Carbamoyl phosphate synthetase II OS=Plasmodium falciparum PE=4 SV=1
O97282	>tr|O97282|O97282_PLAF7 T-complex protein 1 subunit epsilon OS=Plasmodium falciparum (isolate 3D7) GN=PF3D7_0320300 PE=3 SV=1
Q8I1U7	>sp|Q8I1U7|SMC3_PLAF7 Structural maintenance of chromosomes protein 3 homolog OS=Plasmodium falciparum (isolate 3D7) GN=PFD0685c PE=1 SV=1
Q8ID31	>tr|Q8ID31|Q8ID31_PLAF7 Alanine--tRNA ligase OS=Plasmodium falciparum (isolate 3D7) GN=PF3D7_1367700 PE=3 SV=1
K7NTP5	>tr|K7NTP5|K7NTP5_PLAF7 Heat shock protein 70 OS=Plasmodium falciparum (isolate 3D7) GN=PF3D7_0831700 PE=2 SV=1
O97247	>tr|O97247|O97247_PLAF7 T-complex protein 1 subunit beta OS=Plasmodium falciparum (isolate 3D7) GN=PF3D7_0306800 PE=3 SV=4
Q8IDJ8	>tr|Q8IDJ8|Q8IDJ8_PLAF7 Lysine--tRNA ligase OS=Plasmodium falciparum (isolate 3D7) GN=PF3D7_1350100 PE=1 SV=1
Q8IKM7	>tr|Q8IKM7|Q8IKM7_PLAF7 Uncharacterized protein OS=Plasmodium falciparum (isolate 3D7) GN=PF14_0577 PE=4 SV=1
A0A144A0G8	>tr|A0A144A0G8|A0A144A0G8_PLAF7 Proline--tRNA ligase OS=Plasmodium falciparum (isolate 3D7) GN=PF3D7_1213800 PE=3 SV=1;>sp|Q8I5R7|SYP_PLAF7 Proline--tRNA ligase OS=Plasmodium falciparum (isolate 3D7) GN=proRS PE=1 SV=1
Q8I5F9	>tr|Q8I5F9|Q8I5F9_PLAF7 Ubiquitin-activating enzyme E1 OS=Plasmodium falciparum (isolate 3D7) GN=PF3D7_1225800 PE=4 SV=1
Q8IIG6	>tr|Q8IIG6|Q8IIG6_PLAF7 Phosphoglycerate mutase OS=Plasmodium falciparum (isolate 3D7) GN=PF11_0208 PE=1 SV=1
O96220	>tr|O96220|O96220_PLAF7 T-complex protein 1 subunit theta OS=Plasmodium falciparum (isolate 3D7) GN=PF3D7_0214000 PE=3 SV=3
Q8III5	>tr|Q8III5|Q8III5_PLAF7 Insulinase, putative OS=Plasmodium falciparum (isolate 3D7) GN=PF11_0189 PE=4 SV=1
Q8IEC8	>tr|Q8IEC8|Q8IEC8_PLAF7 Translocation protein SEC63 OS=Plasmodium falciparum (isolate 3D7) GN=PF3D7_1318800 PE=4 SV=1
Q8IJS1	>tr|Q8IJS1|Q8IJS1_PLAF7 Hypoxanthine phosphoribosyltransferase OS=Plasmodium falciparum (isolate 3D7) GN=PF10_0121 PE=4 SV=1;>tr|Q03925|Q03925_PLAFA Hypoxanthine-guanine phosphoribosyltransferase (Fragment) OS=Plasmodium falciparum PE=4 SV=1
C6KT76	>tr|C6KT76|C6KT76_PLAF7 Phosphotransferase OS=Plasmodium falciparum (isolate 3D7) GN=PF3D7_0624000 PE=3 SV=1;>sp|Q02155|HXK_PLAFA Hexokinase OS=Plasmodium falciparum GN=HK PE=3 SV=1
Q8I3T8	>tr|Q8I3T8|Q8I3T8_PLAF7 60S ribosomal protein L12, putative OS=Plasmodium falciparum (isolate 3D7) GN=PF3D7_0517000 PE=3 SV=2
Q8IKQ7	>tr|Q8IKQ7|Q8IKQ7_PLAF7 Uncharacterized protein OS=Plasmodium falciparum (isolate 3D7) GN=PF14_0546 PE=4 SV=1
Q8I0U6	>tr|Q8I0U6|Q8I0U6_PLAF7 Ring-infected erythrocyte surface antigen OS=Plasmodium falciparum (isolate 3D7) GN=PF3D7_0102200 PE=4 SV=1
Q8IB60	>tr|Q8IB60|Q8IB60_PLAF7 PfSec23 protein OS=Plasmodium falciparum (isolate 3D7) GN=pfsec23 PE=2 SV=1
O97313	>sp|O97313|RS3A_PLAF7 40S ribosomal protein S3a OS=Plasmodium falciparum (isolate 3D7) GN=MAL3P7.35 PE=1 SV=1
Q8IJI0	>tr|Q8IJI0|Q8IJI0_PLAF7 Pre-mRNA splicing factor, putative OS=Plasmodium falciparum (isolate 3D7) GN=PF10_0217 PE=4 SV=1
Q8IJX8	>tr|Q8IJX8|Q8IJX8_PLAF7 DNA/RNA-binding protein Alba 3 OS=Plasmodium falciparum (isolate 3D7) GN=PF10_0063 PE=4 SV=1
Q8IIW2	>tr|Q8IIW2|Q8IIW2_PLAF7 Phenylalanine--tRNA ligase beta subunit OS=Plasmodium falciparum (isolate 3D7) GN=PF11_0051 PE=4 SV=1
C6KT82	>tr|C6KT82|C6KT82_PLAF7 SNF2 helicase, putative OS=Plasmodium falciparum (isolate 3D7) GN=PF3D7_0624600 PE=4 SV=1
C6KSW5	>tr|C6KSW5|C6KSW5_PLAF7 Eukaryotic translation initiation factor 3 subunit L OS=Plasmodium falciparum (isolate 3D7) GN=PF3D7_0612100 PE=3 SV=1
Q8IE10	>tr|Q8IE10|Q8IE10_PLAF7 Glutamine--tRNA ligase, putative OS=Plasmodium falciparum (isolate 3D7) GN=PF3D7_1331700 PE=3 SV=1
Q8I3R2	>tr|Q8I3R2|Q8I3R2_PLAF7 Uncharacterized protein OS=Plasmodium falciparum (isolate 3D7) GN=PF3D7_0519800 PE=4 SV=1
Q8I305	>tr|Q8I305|Q8I305_PLAF7 Transporter, putative OS=Plasmodium falciparum (isolate 3D7) GN=PF3D7_0914700 PE=4 SV=1
Q8I5S6	>tr|Q8I5S6|Q8I5S6_PLAF7 Eukaryotic translation initiation factor 3 subunit A OS=Plasmodium falciparum (isolate 3D7) GN=PF3D7_1212700 PE=3 SV=1
Q8IJZ9	>tr|Q8IJZ9|Q8IJZ9_PLAF7 U5 small nuclear ribonuclear protein, putative OS=Plasmodium falciparum (isolate 3D7) GN=PF10_0041 PE=4 SV=1
Q8ID50	>tr|Q8ID50|Q8ID50_PLAF7 Ubiquitin-60S ribosomal protein L40 OS=Plasmodium falciparum (isolate 3D7) GN=PF3D7_1365900 PE=1 SV=1;>tr|Q9U5M1|Q9U5M1_PLAFA Polyubiquitin OS=Plasmodium falciparum GN=pub PE=4 SV=1;>tr|Q7KQK2|Q7KQK2_PLAF7 PfpUB Plasmodium falciparu
Q9TY94	>tr|Q9TY94|Q9TY94_PLAF7 ATP-dependent RNA helicase UAP56 OS=Plasmodium falciparum (isolate 3D7) GN=UAP56 PE=4 SV=1;>tr|A7U5W6|A7U5W6_PLAFA DEAD-box helicase 1 OS=Plasmodium falciparum PE=4 SV=1
Q8IBA0	>tr|Q8IBA0|Q8IBA0_PLAF7 Receptor for activated c kinase OS=Plasmodium falciparum (isolate 3D7) GN=PF3D7_0826700 PE=4 SV=1;>tr|Q7YST8|Q7YST8_PLAFA Activated protein kinase C receptor OS=Plasmodium falciparum GN=RACK PE=2 SV=1
Q8IDR9	>tr|Q8IDR9|Q8IDR9_PLAF7 40S ribosomal protein S6 OS=Plasmodium falciparum (isolate 3D7) GN=PF3D7_1342000 PE=1 SV=1
Q8ILE8	>tr|Q8ILE8|Q8ILE8_PLAF7 60S ribosomal protein L14, putative OS=Plasmodium falciparum (isolate 3D7) GN=PF14_0296 PE=1 SV=1
Q8I207	>tr|Q8I207|Q8I207_PLAF7 Uncharacterized protein OS=Plasmodium falciparum (isolate 3D7) GN=PF3D7_0401800 PE=4 SV=1
Q8IM10	>tr|Q8IM10|Q8IM10_PLAF7 40S ribosomal protein S8 OS=Plasmodium falciparum (isolate 3D7) GN=PF14_0083 PE=1 SV=1
Q8IET7	>tr|Q8IET7|Q8IET7_PLAF7 40S ribosomal protein S7, putative OS=Plasmodium falciparum (isolate 3D7) GN=PF3D7_1302800 PE=1 SV=1
C6KT50	>sp|C6KT50|PDX1_PLAF7 Pyridoxal 5-phosphate synthase subunit Pdx1 OS=Plasmodium falciparum (isolate 3D7) GN=pdx1 PE=1 SV=1
Q8I3R0	>tr|Q8I3R0|Q8I3R0_PLAF7 40S ribosomal protein S9, putative OS=Plasmodium falciparum (isolate 3D7) GN=PF3D7_0520000 PE=1 SV=1
Q8IC16	>tr|Q8IC16|Q8IC16_PLAF7 DNA helicase OS=Plasmodium falciparum (isolate 3D7) GN=PF3D7_0705400 PE=3 SV=1
Q8IL56	>tr|Q8IL56|Q8IL56_PLAF7 FACT complex subunit SSRP1 OS=Plasmodium falciparum (isolate 3D7) GN=PF14_0393 PE=3 SV=1
Q8I5L6	>tr|Q8I5L6|Q8I5L6_PLAF7 Clathrin heavy chain OS=Plasmodium falciparum (isolate 3D7) GN=PF3D7_1219100 PE=3 SV=1
Q8IBS3	>tr|Q8IBS3|Q8IBS3_PLAF7 Serine--tRNA ligase, putative OS=Plasmodium falciparum (isolate 3D7) GN=PF3D7_0717700 PE=4 SV=1
O97320	>tr|O97320|O97320_PLAF7 Histone H2A OS=Plasmodium falciparum (isolate 3D7) GN=PF3D7_0320900 PE=3 SV=1
Q8IAX5	>tr|Q8IAX5|Q8IAX5_PLAF7 40S ribosomal protein S16, putative OS=Plasmodium falciparum (isolate 3D7) GN=PF3D7_0813900 PE=1 SV=1
Q8IL58	>tr|Q8IL58|Q8IL58_PLAF7 60S ribosomal protein L1, putative OS=Plasmodium falciparum (isolate 3D7) GN=PF14_0391 PE=4 SV=1
Q8I2Q0	>tr|Q8I2Q0|Q8I2Q0_PLAF7 Uncharacterized protein OS=Plasmodium falciparum (isolate 3D7) GN=PF3D7_0925900 PE=4 SV=1
Q8ILQ3	>tr|Q8ILQ3|Q8ILQ3_PLAF7 Uncharacterized protein OS=Plasmodium falciparum (isolate 3D7) GN=PF14_0191 PE=4 SV=1
C6KSV3	>tr|C6KSV3|C6KSV3_PLAF7 Transketolase OS=Plasmodium falciparum (isolate 3D7) GN=PF3D7_0610800 PE=4 SV=1
Q8IIC8	>tr|Q8IIC8|Q8IIC8_PLAF7 Uncharacterized protein OS=Plasmodium falciparum (isolate 3D7) GN=PF11_0246 PE=4 SV=1
