# Supplementary material for: A Plasmodium falciparum MORC protein complex modulates epigenetic control of gene expression through interaction with heterochromatin
Source: eLife. 2024 Oct 16;12:RP92201. doi: 10.7554/eLife.92201 (PMC11483127; doi:10.7554/eLife.92201)
Supplement: Supplementary file 2. [file elife-92201-supp2.xlsx]

## Sheet: Fold-Change > 1.5
Supplementary File 2 - Complete list of potential PfMORC interacting proteins enriched in CoIP eluates and identified in LC‒MS/MS from three independent experiments and fold change ≥ 1.5x GFP/3D7.
Fasta headers	Fold-change-GFP/3D7	PlasmoDB ID
>tr|Q8I3R2|Q8I3R2_PLAF7 EELM2 domain-containing protein, putative OS=Plasmodium falciparum (isolate 3D7) OX=36329 GN=PF3D7_0519800 PE=4 SV=1	20.7986	PF3D7_0519800
>tr|Q8IHX2|Q8IHX2_PLAF7 AP2 domain transcription factor, putative OS=Plasmodium falciparum (isolate 3D7) OX=36329 GN=PF3D7_1139300 PE=4 SV=1	20.5007	PF3D7_1139300
>tr|Q8IKY0|Q8IKY0_PLAF7 AP2 domain transcription factor AP2-O5, putative OS=Plasmodium falciparum (isolate 3D7) OX=36329 GN=PF3D7_1449500 PE=4 SV=1	14.9983	PF3D7_1449500
>tr|Q8IKF6|Q8IKF6_PLAF7 Kelch domain-containing protein, putative OS=Plasmodium falciparum (isolate 3D7) OX=36329 GN=PF3D7_1468100 PE=4 SV=1	11.7638	PF3D7_1468100
>tr|Q8IJG6|Q8IJG6_PLAF7 Chromodomain-helicase-DNA-binding protein 1 homolog, putative OS=Plasmodium falciparum (isolate 3D7) OX=36329 GN=PF3D7_1023900 PE=4 SV=1	10.61	PF3D7_1023900
>tr|Q8IKP1|Q8IKP1_PLAF7 ATP-dependent RNA helicase DBP5 OS=Plasmodium falciparum (isolate 3D7) OX=36329 GN=PF3D7_1459000 PE=4 SV=1	10.2396	PF3D7_1459000
>tr|Q8IKL5|Q8IKL5_PLAF7 Valyl-tRNA synthetase OS=Plasmodium falciparum (isolate 3D7) OX=36329 GN=PF3D7_1461900 PE=3 SV=1	7.68436	PF3D7_1461900
>tr|O77375|O77375_PLAF7 DNA-directed RNA polymerase subunit OS=Plasmodium falciparum (isolate 3D7) OX=36329 GN=PF3D7_0318200 PE=3 SV=1	7.68436	PF3D7_0318200
>tr|Q8IKM7|Q8IKM7_PLAF7 Uncharacterized protein OS=Plasmodium falciparum (isolate 3D7) OX=36329 GN=PF3D7_1460500 PE=4 SV=1	7.61084	PF3D7_1460500
>tr|Q8II16|Q8II16_PLAF7 Coatomer subunit delta OS=Plasmodium falciparum (isolate 3D7) OX=36329 GN=PF3D7_1134800 PE=3 SV=1	7.49917	PF3D7_1134800
>tr|Q8I5E7|Q8I5E7_PLAF7 DNA helicase 60 OS=Plasmodium falciparum (isolate 3D7) OX=36329 GN=PF3D7_1227100 PE=3 SV=1	6.54938	PF3D7_1227100
>tr|Q8II32|Q8II32_PLAF7 Uncharacterized protein OS=Plasmodium falciparum (isolate 3D7) OX=36329 GN=PF3D7_1133200 PE=4 SV=1	6.22156	PF3D7_1133200
>tr|C0H530|C0H530_PLAF7 Exportin-7, putative OS=Plasmodium falciparum (isolate 3D7) OX=36329 GN=PF3D7_0910100 PE=4 SV=1	5.85119	PF3D7_0910100
>tr|Q8I5Y3|Q8I5Y3_PLAF7 Eukaryotic translation initiation factor 3 subunit C OS=Plasmodium falciparum (isolate 3D7) OX=36329 GN=PF3D7_1206200 PE=3 SV=1	5.16877	PF3D7_1206200
>tr|O96236|O96236_PLAF7 DNA-directed RNA polymerase subunit beta OS=Plasmodium falciparum (isolate 3D7) OX=36329 GN=PF3D7_0215700 PE=3 SV=3	5.01297	PF3D7_0215700
>tr|Q8IHS5|Q8IHS5_PLAF7 40S ribosomal protein S21 OS=Plasmodium falciparum (isolate 3D7) OX=36329 GN=PF3D7_1144000 PE=1 SV=1	4.94395	PF3D7_1144000
>tr|A0A144A4E0|A0A144A4E0_PLAF7 Thioredoxin OS=Plasmodium falciparum (isolate 3D7) OX=36329 GN=PF3D7_1457200 PE=3 SV=1	4.94395	PF3D7_1457200
>tr|Q8IJW6|Q8IJW6_PLAF7 AP2 domain transcription factor AP2-I OS=Plasmodium falciparum (isolate 3D7) OX=36329 GN=PF3D7_1007700 PE=4 SV=1	4.6494	PF3D7_1007700
>tr|Q8IIR8|Q8IIR8_PLAF7 Succinate--CoA ligase [ADP-forming] subunit alpha, mitochondrial OS=Plasmodium falciparum (isolate 3D7) OX=36329 GN=PF3D7_1108500 PE=3 SV=2	4.57358	PF3D7_1108500
>tr|Q9TY99|Q9TY99_PLAF7 Knob-associated histidine-rich protein OS=Plasmodium falciparum (isolate 3D7) OX=36329 GN=PF3D7_0202000 PE=4 SV=1	4.56752	PF3D7_0202000
>tr|Q8IJL2|Q8IJL2_PLAF7 Eukaryotic translation initiation factor 2A OS=Plasmodium falciparum (isolate 3D7) OX=36329 GN=PF3D7_1019000 PE=3 SV=1	4.38839	PF3D7_1019000
>tr|Q8IEG8|Q8IEG8_PLAF7 Pinin/SDK/MemA domain-containing protein, putative OS=Plasmodium falciparum (isolate 3D7) OX=36329 GN=PF3D7_1314700 PE=4 SV=1	4.38839	PF3D7_1314700
>tr|Q8IEG2|Q8IEG2_PLAF7 Uncharacterized protein OS=Plasmodium falciparum (isolate 3D7) OX=36329 GN=PF3D7_1315300 PE=4 SV=1	4.38839	PF3D7_1315300
>tr|Q8I5B3|Q8I5B3_PLAF7 Protein transport protein SEC13 OS=Plasmodium falciparum (isolate 3D7) OX=36329 GN=PF3D7_1230700 PE=3 SV=1	4.38839	PF3D7_1230700
>tr|Q8I259|Q8I259_PLAF7 Uncharacterized protein OS=Plasmodium falciparum (isolate 3D7) OX=36329 GN=PF3D7_0108300 PE=4 SV=2	4.38839	PF3D7_0108300
>tr|A0A5K1K8J0|A0A5K1K8J0_PLAF7 RNA lariat debranching enzyme, putative OS=Plasmodium falciparum (isolate 3D7) OX=36329 GN=PF3D7_1340600 PE=4 SV=1	4.38839	PF3D7_1340600
>tr|Q8IKQ7|Q8IKQ7_PLAF7 MA3 domain-containing protein, putative OS=Plasmodium falciparum (isolate 3D7) OX=36329 GN=PF3D7_1457300 PE=3 SV=1	4.28678	PF3D7_1457300
>tr|Q8I289|Q8I289_PLAF7 Heptatricopeptide repeat and RAP domain-containing protein, putative OS=Plasmodium falciparum (isolate 3D7) OX=36329 GN=PF3D7_0105200 PE=4 SV=1	4.20858	PF3D7_0105200
>tr|C0H5L9|C0H5L9_PLAF7 Membrane associated histidine-rich protein 1 OS=Plasmodium falciparum (isolate 3D7) OX=36329 GN=PF3D7_1370300 PE=4 SV=1	3.93477	PF3D7_1370300
>tr|Q8IAV1|Q8IAV1_PLAF7 Uncharacterized protein OS=Plasmodium falciparum (isolate 3D7) OX=36329 GN=PF3D7_0811600 PE=4 SV=1	3.90079	PF3D7_0811600
>tr|Q8I608|Q8I608_PLAF7 Nucleosome assembly protein OS=Plasmodium falciparum (isolate 3D7) OX=36329 GN=PF3D7_1203700 PE=1 SV=2	3.84265	PF3D7_1203700
>tr|Q8I207|Q8I207_PLAF7 PRESAN domain-containing protein OS=Plasmodium falciparum (isolate 3D7) OX=36329 GN=PF3D7_0401800 PE=4 SV=1	3.82185	PF3D7_0401800
>tr|A0A144A026|A0A144A026_PLAF7 Merozoite surface protein 9 OS=Plasmodium falciparum (isolate 3D7) OX=36329 GN=PF3D7_1228600 PE=4 SV=1	3.57245	PF3D7_1228600
>tr|C0H4L1|C0H4L1_PLAF7 Importin-7, putative OS=Plasmodium falciparum (isolate 3D7) OX=36329 GN=PF3D7_0706000 PE=4 SV=1	3.31746	PF3D7_0706000
>tr|Q8ILR6|Q8ILR6_PLAF7 Ubiquitin fusion degradation protein 1, putative OS=Plasmodium falciparum (isolate 3D7) OX=36329 GN=PF3D7_1418000 PE=3 SV=2	3.29597	PF3D7_1418000
>tr|Q7K6B1|Q7K6B1_PLAF7 Histidine triad nucleotide-binding protein 1 OS=Plasmodium falciparum (isolate 3D7) OX=36329 GN=PF3D7_0817500 PE=4 SV=2	3.29597	PF3D7_0817500
>tr|C0H4F7|C0H4F7_PLAF7 18S rRNA (Guanine-N(7))-methyltransferase, putative OS=Plasmodium falciparum (isolate 3D7) OX=36329 GN=PF3D7_0522300 PE=3 SV=1	3.29597	PF3D7_0522300
>tr|A0A144A323|A0A144A323_PLAF7 Glutathione reductase OS=Plasmodium falciparum (isolate 3D7) OX=36329 GN=PF3D7_1419800.1 PE=3 SV=1;>tr|A0A144A3W0|A0A144A3W0_PLAF7 Glutathione reductase OS=Plasmodium falciparum (isolate 3D7) OX=36329 GN=PF3D7_1419800.2 PE=3	3.29597	PF3D7_1419800
>tr|Q8I2W4|Q8I2W4_PLAF7 Gamma-ECS OS=Plasmodium falciparum (isolate 3D7) OX=36329 GN=PF3D7_0918900 PE=3 SV=1	3.182	PF3D7_0918900
>tr|Q8IKV7|Q8IKV7_PLAF7 Ribosome biogenesis protein TSR1, putative OS=Plasmodium falciparum (isolate 3D7) OX=36329 GN=PF3D7_1451900 PE=4 SV=1	3.11078	PF3D7_1451900
>tr|Q8I238|Q8I238_PLAF7 Chromatin assembly factor 1 protein WD40 domain, putative OS=Plasmodium falciparum (isolate 3D7) OX=36329 GN=PF3D7_0110700 PE=4 SV=1	3.11078	PF3D7_0110700
>tr|Q8IIS4|Q8IIS4_PLAF7 AP2 domain transcription factor, putative OS=Plasmodium falciparum (isolate 3D7) OX=36329 GN=PF3D7_1107800 PE=4 SV=1	3.10844	PF3D7_1107800
>tr|Q8IB73|Q8IB73_PLAF7 Dicarboxylate/tricarboxylate carrier OS=Plasmodium falciparum (isolate 3D7) OX=36329 GN=PF3D7_0823900 PE=3 SV=1	3.01819	PF3D7_0823900
>tr|Q8IKC5|Q8IKC5_PLAF7 Diacylglycerol kinase OS=Plasmodium falciparum (isolate 3D7) OX=36329 GN=PF3D7_1471400 PE=3 SV=2	2.92559	PF3D7_1471400
>tr|Q8IIK1|Q8IIK1_PLAF7 Folate transporter 2 OS=Plasmodium falciparum (isolate 3D7) OX=36329 GN=PF3D7_1116500 PE=3 SV=1	2.92559	PF3D7_1116500
>tr|Q8II78|Q8II78_PLAF7 Fe-S cluster assembly protein, putative OS=Plasmodium falciparum (isolate 3D7) OX=36329 GN=PF3D7_1128500 PE=4 SV=1	2.92559	PF3D7_1128500
>tr|Q8I3I6|Q8I3I6_PLAF7 AP complex subunit beta OS=Plasmodium falciparum (isolate 3D7) OX=36329 GN=PF3D7_0528100 PE=3 SV=2	2.92559	PF3D7_0528100
>tr|Q8I1X5|Q8I1X5_PLAF7 Pre-mRNA-processing-splicing factor 8, putative OS=Plasmodium falciparum (isolate 3D7) OX=36329 GN=PF3D7_0405400 PE=4 SV=1	2.92559	PF3D7_0405400
>tr|Q8I0W8|Q8I0W8_PLAF7 Deoxyribodipyrimidine photo-lyase, putative OS=Plasmodium falciparum (isolate 3D7) OX=36329 GN=PF3D7_0513600 PE=4 SV=1	2.92559	PF3D7_0513600
>tr|O96221|O96221_PLAF7 Protein transport protein SEC31 OS=Plasmodium falciparum (isolate 3D7) OX=36329 GN=PF3D7_0214100 PE=3 SV=3	2.92559	PF3D7_0214100
>tr|C6KSV4|C6KSV4_PLAF7 Transcription elongation factor SPT5, putative OS=Plasmodium falciparum (isolate 3D7) OX=36329 GN=PF3D7_0610900 PE=3 SV=1	2.92559	PF3D7_0610900
>tr|A0A5K1K931|A0A5K1K931_PLAF7 6-cysteine protein OS=Plasmodium falciparum (isolate 3D7) OX=36329 GN=PF3D7_1364100 PE=4 SV=1;>sp|Q8ID66|PF92_PLAF7 Merozoite surface protein P92 OS=Plasmodium falciparum (isolate 3D7) OX=36329 GN=PF92 PE=1 SV=1	2.92559	PF3D7_1364100
>sp|Q8IBZ9|CRT_PLAF7 Putative chloroquine resistance transporter OS=Plasmodium falciparum (isolate 3D7) OX=36329 GN=CG10 PE=3 SV=1	2.92559	PF3D7_0709000
>tr|C0H4U5|C0H4U5_PLAF7 Uncharacterized protein OS=Plasmodium falciparum (isolate 3D7) OX=36329 GN=PF3D7_0813400 PE=4 SV=1	2.91802	PF3D7_0813400
>tr|Q8I635|Q8I635_PLAF7 Uncharacterized protein OS=Plasmodium falciparum (isolate 3D7) OX=36329 GN=PF3D7_1201000 PE=4 SV=1	2.86639	PF3D7_1201000
>tr|O77372|O77372_PLAF7 Uncharacterized protein OS=Plasmodium falciparum (isolate 3D7) OX=36329 GN=PF3D7_0318500 PE=4 SV=1	2.85552	PF3D7_0318500
>tr|Q8I4U3|Q8I4U3_PLAF7 Uncharacterized protein OS=Plasmodium falciparum (isolate 3D7) OX=36329 GN=PF3D7_1249100 PE=4 SV=1	2.8299	PF3D7_1249100
>tr|Q8IE18|Q8IE18_PLAF7 RNA-binding protein, putative OS=Plasmodium falciparum (isolate 3D7) OX=36329 GN=PF3D7_1330800 PE=4 SV=1	2.76714	PF3D7_1330800
>tr|Q8IAM0|Q8IAM0_PLAF7 Glutamate dehydrogenase, putative OS=Plasmodium falciparum (isolate 3D7) OX=36329 GN=PF3D7_0802000 PE=3 SV=1	2.70711	PF3D7_0802000
>tr|Q8IBS3|Q8IBS3_PLAF7 Seryl-tRNA synthetase OS=Plasmodium falciparum (isolate 3D7) OX=36329 GN=PF3D7_0717700 PE=4 SV=1	2.70324	PF3D7_0717700
>tr|Q8IJK8|Q8IJK8_PLAF7 60S ribosomal protein L30e, putative OS=Plasmodium falciparum (isolate 3D7) OX=36329 GN=PF3D7_1019400 PE=1 SV=1	2.63677	PF3D7_1019400
>tr|Q8IJ77|Q8IJ77_PLAF7 S-adenosylmethionine decarboxylase/ornithine decarboxylase OS=Plasmodium falciparum (isolate 3D7) OX=36329 GN=PF3D7_1033100 PE=3 SV=1	2.5599	PF3D7_1033100
>tr|Q8I4R5|Q8I4R5_PLAF7 Rhoptry neck protein 3 OS=Plasmodium falciparum (isolate 3D7) OX=36329 GN=PF3D7_1252100 PE=4 SV=1	2.5599	PF3D7_1252100
>tr|Q8IHR6|Q8IHR6_PLAF7 Coatomer subunit gamma OS=Plasmodium falciparum (isolate 3D7) OX=36329 GN=PF3D7_1145100 PE=3 SV=1	2.55981	PF3D7_1145100
>tr|C6KTB3|C6KTB3_PLAF7 Transportin OS=Plasmodium falciparum (isolate 3D7) OX=36329 GN=PF3D7_0627700 PE=4 SV=1	2.5281	PF3D7_0627700
>tr|Q8IEN2|Q8IEN2_PLAF7 40S ribosomal protein S27 OS=Plasmodium falciparum (isolate 3D7) OX=36329 GN=PF3D7_1308300 PE=1 SV=1	2.47198	PF3D7_1308300
>tr|C6KSY0|C6KSY0_PLAF7 AP2 domain transcription factor, putative OS=Plasmodium falciparum (isolate 3D7) OX=36329 GN=PF3D7_0613800 PE=4 SV=1	2.43113	PF3D7_0613800
>tr|Q8IAN7|Q8IAN7_PLAF7 Tubulin gamma chain OS=Plasmodium falciparum (isolate 3D7) OX=36329 GN=PF3D7_0803700 PE=3 SV=1	2.42535	PF3D7_0803700
>sp|Q8I1N6|AP2A_PLAF7 AP2/ERF domain-containing protein PFD0985w OS=Plasmodium falciparum (isolate 3D7) OX=36329 GN=PFD0985w PE=1 SV=2	2.37938	PF3D7_0420300
>tr|Q8IAK9|Q8IAK9_PLAF7 PRESAN domain-containing protein OS=Plasmodium falciparum (isolate 3D7) OX=36329 GN=PF3D7_0801000 PE=4 SV=1	2.37938	PF3D7_0801000
>tr|A0A143ZZK9|A0A143ZZK9_PLAF7 Non-SERCA-type Ca2+ -transporting P-ATPase OS=Plasmodium falciparum (isolate 3D7) OX=36329 GN=PF3D7_1211900 PE=4 SV=1	2.34302	PF3D7_1211900
>tr|Q8ILX3|Q8ILX3_PLAF7 Mini-chromosome maintenance complex-binding protein, putative OS=Plasmodium falciparum (isolate 3D7) OX=36329 GN=PF3D7_1412100 PE=4 SV=1	2.29491	PF3D7_1412100
>tr|Q8I447|Q8I447_PLAF7 DNA mismatch repair protein OS=Plasmodium falciparum (isolate 3D7) OX=36329 GN=PF3D7_0505500 PE=3 SV=1	2.24049	PF3D7_0505500
>sp|O77323|TCPH_PLAF7 T-complex protein 1 subunit eta OS=Plasmodium falciparum (isolate 3D7) OX=36329 GN=MAL3P3.6 PE=3 SV=1	2.23088	PF3D7_0308200
>tr|A0A144A1B3|A0A144A1B3_PLAF7 Protein SEY1 homolog OS=Plasmodium falciparum (isolate 3D7) OX=36329 GN=PF3D7_1416100 PE=3 SV=1	2.20189	PF3D7_1416100
>tr|Q9U0N4|Q9U0N4_PLAF7 Multidrug resistance-associated protein 1 OS=Plasmodium falciparum (isolate 3D7) OX=36329 GN=PF3D7_0112200 PE=4 SV=1	2.1942	PF3D7_0112200
>tr|Q8IKH3|Q8IKH3_PLAF7 26S proteasome regulatory subunit RPN2, putative OS=Plasmodium falciparum (isolate 3D7) OX=36329 GN=PF3D7_1466300 PE=3 SV=1	2.1942	PF3D7_1466300
>tr|C6KT56|C6KT56_PLAF7 Signal recognition particle subunit SRP68, putative OS=Plasmodium falciparum (isolate 3D7) OX=36329 GN=PF3D7_0621900 PE=3 SV=1	2.1942	PF3D7_0621900
>tr|Q8I2G2|Q8I2G2_PLAF7 Cytoadherence linked asexual protein 9 OS=Plasmodium falciparum (isolate 3D7) OX=36329 GN=PF3D7_0935800 PE=4 SV=1	2.13836	PF3D7_0935800
>tr|Q8ILZ7|Q8ILZ7_PLAF7 CUGBP Elav-like family member 2, putative OS=Plasmodium falciparum (isolate 3D7) OX=36329 GN=PF3D7_1409800 PE=4 SV=1	2.12555	PF3D7_1409800
>tr|Q8IM23|Q8IM23_PLAF7 rRNA 2-O-methyltransferase fibrillarin, putative OS=Plasmodium falciparum (isolate 3D7) OX=36329 GN=PF3D7_1407100 PE=3 SV=1	2.10128	PF3D7_1407100
>tr|C6KT82|C6KT82_PLAF7 SNF2 helicase, putative OS=Plasmodium falciparum (isolate 3D7) OX=36329 GN=PF3D7_0624600 PE=4 SV=1	2.09414	PF3D7_0624600
>tr|Q8I4U5|Q8I4U5_PLAF7 26S protease regulatory subunit 8, putative OS=Plasmodium falciparum (isolate 3D7) OX=36329 GN=PF3D7_1248900 PE=3 SV=1	2.06449	PF3D7_1248900
>tr|Q8I531|Q8I531_PLAF7 AP2 domain transcription factor, putative OS=Plasmodium falciparum (isolate 3D7) OX=36329 GN=PF3D7_1239200 PE=4 SV=1	2.01302	PF3D7_1239200
>tr|Q8I2A8|Q8I2A8_PLAF7 Nucleoside transporter 4 OS=Plasmodium falciparum (isolate 3D7) OX=36329 GN=PF3D7_0103200 PE=3 SV=1	1.9504	PF3D7_0103200
>tr|Q8II43|Q8II43_PLAF7 CCT-alpha OS=Plasmodium falciparum (isolate 3D7) OX=36329 GN=PF3D7_1132200 PE=3 SV=1	1.90885	PF3D7_1132200
>tr|Q8ILQ3|Q8ILQ3_PLAF7 Uncharacterized protein OS=Plasmodium falciparum (isolate 3D7) OX=36329 GN=PF3D7_1419700 PE=4 SV=1	1.89804	PF3D7_1419700
>tr|Q8IJI4|Q8IJI4_PLAF7 PHAX domain-containing protein, putative OS=Plasmodium falciparum (isolate 3D7) OX=36329 GN=PF3D7_1021900 PE=4 SV=1	1.89754	PF3D7_1021900
>tr|Q8III5|Q8III5_PLAF7 Insulinase, putative OS=Plasmodium falciparum (isolate 3D7) OX=36329 GN=PF3D7_1118300 PE=4 SV=1	1.84648	PF3D7_1118300
>tr|A0A5K1K8V8|A0A5K1K8V8_PLAF7 60S ribosomal protein L6, putative OS=Plasmodium falciparum (isolate 3D7) OX=36329 GN=PF3D7_1338200 PE=3 SV=1	1.81902	PF3D7_1338200
>tr|Q8I3J5|Q8I3J5_PLAF7 DNA replication licensing factor MCM3, putative OS=Plasmodium falciparum (isolate 3D7) OX=36329 GN=PF3D7_0527000 PE=3 SV=1	1.81424	PF3D7_0527000
>tr|Q8I5N9|Q8I5N9_PLAF7 DNA-binding chaperone, putative OS=Plasmodium falciparum (isolate 3D7) OX=36329 GN=PF3D7_1216900 PE=4 SV=1	1.79509	PF3D7_1216900
>tr|Q8I2U5|Q8I2U5_PLAF7 Inosine-5-monophosphate dehydrogenase OS=Plasmodium falciparum (isolate 3D7) OX=36329 GN=PF3D7_0920800 PE=3 SV=1	1.79371	PF3D7_0920800
>tr|Q8I2B1|Q8I2B1_PLAF7 Aspartyl-tRNA synthetase OS=Plasmodium falciparum (isolate 3D7) OX=36329 GN=PF3D7_0102900 PE=3 SV=1	1.74927	PF3D7_0102900
>tr|Q8ILI2|Q8ILI2_PLAF7 Proliferation-associated protein 2g4, putative OS=Plasmodium falciparum (isolate 3D7) OX=36329 GN=PF3D7_1428300 PE=3 SV=1	1.71606	PF3D7_1428300
>tr|Q8IAX8|Q8IAX8_PLAF7 DNA/RNA-binding protein Alba 1 OS=Plasmodium falciparum (isolate 3D7) OX=36329 GN=PF3D7_0814200 PE=4 SV=1	1.69543	PF3D7_0814200
>tr|Q8IIS9|Q8IIS9_PLAF7 Polyadenylate-binding protein-interacting protein 1, putative OS=Plasmodium falciparum (isolate 3D7) OX=36329 GN=PF3D7_1107300 PE=4 SV=1	1.69484	PF3D7_1107300
>tr|Q8I3I5|Q8I3I5_PLAF7 Eukaryotic translation initiation factor 3 subunit E OS=Plasmodium falciparum (isolate 3D7) OX=36329 GN=PF3D7_0528200 PE=3 SV=1	1.6652	PF3D7_0528200
>tr|Q9NFE6|Q9NFE6_PLAF7 Eukaryotic translation initiation factor 3 subunit K OS=Plasmodium falciparum (isolate 3D7) OX=36329 GN=PF3D7_0310600.1 PE=3 SV=1	1.64798	PF3D7_0310600
>tr|Q9NLB8|Q9NLB8_PLAF7 EH domain-containing protein OS=Plasmodium falciparum (isolate 3D7) OX=36329 GN=PF3D7_0304200 PE=4 SV=1	1.64798	PF3D7_0304200
>tr|Q8IJS0|Q8IJS0_PLAF7 Phosphoglucomutase, putative OS=Plasmodium falciparum (isolate 3D7) OX=36329 GN=PF3D7_1012500 PE=3 SV=1	1.64798	PF3D7_1012500
>tr|Q8IJ63|Q8IJ63_PLAF7 ADP-ribosylation factor, putative OS=Plasmodium falciparum (isolate 3D7) OX=36329 GN=PF3D7_1034700 PE=3 SV=1;>tr|Q8IL50|Q8IL50_PLAF7 ADP-ribosylation factor, putative OS=Plasmodium falciparum (isolate 3D7) OX=36329 GN=PF3D7_1442000	1.64798	PF3D7_1034700
>tr|Q8IFQ7|Q8IFQ7_PLAF7 Ribosome-recycling factor OS=Plasmodium falciparum (isolate 3D7) OX=36329 GN=PF3D7_0420400 PE=3 SV=1	1.64798	PF3D7_0420400
>tr|Q8IEL5|Q8IEL5_PLAF7 ATP synthase subunit O, mitochondrial, putative OS=Plasmodium falciparum (isolate 3D7) OX=36329 GN=PF3D7_1310000 PE=3 SV=1	1.64798	PF3D7_1310000
>tr|Q8IEF7|Q8IEF7_PLAF7 tRNA (adenine(58)-N(1))-methyltransferase OS=Plasmodium falciparum (isolate 3D7) OX=36329 GN=PF3D7_1315700 PE=3 SV=1	1.64798	PF3D7_1315700
>tr|Q8IB46|Q8IB46_PLAF7 Uncharacterized protein OS=Plasmodium falciparum (isolate 3D7) OX=36329 GN=PF3D7_0821200 PE=4 SV=1	1.64798	PF3D7_0821200
>tr|Q8IB23|Q8IB23_PLAF7 U3 small nucleolar ribonucleoprotein protein IMP4, putative OS=Plasmodium falciparum (isolate 3D7) OX=36329 GN=PF3D7_0818800 PE=4 SV=1	1.64798	PF3D7_0818800
>tr|Q8I0V9|Q8I0V9_PLAF7 Cleavage and polyadenylation specificity factor subunit 5 OS=Plasmodium falciparum (isolate 3D7) OX=36329 GN=PF3D7_0109200 PE=3 SV=1	1.64798	PF3D7_0109200
>tr|O77321|O77321_PLAF7 DNA polymerase delta small subunit, putative OS=Plasmodium falciparum (isolate 3D7) OX=36329 GN=PF3D7_0308000 PE=3 SV=1	1.64798	PF3D7_0308000
>tr|C6S3I6|C6S3I6_PLAF7 Replication factor A protein 3, putative OS=Plasmodium falciparum (isolate 3D7) OX=36329 GN=PF3D7_1442100 PE=3 SV=1	1.64798	PF3D7_1442100
>tr|C6KSP3|C6KSP3_PLAF7 GYF domain-containing protein OS=Plasmodium falciparum (isolate 3D7) OX=36329 GN=PF3D7_0604500 PE=4 SV=1	1.64798	PF3D7_0604500
>tr|C0H5G3|C0H5G3_PLAF7 60S ribosomal protein L18-2, putative OS=Plasmodium falciparum (isolate 3D7) OX=36329 GN=PF3D7_1341300 PE=1 SV=1	1.64798	PF3D7_1341300
>tr|C0H4C7|C0H4C7_PLAF7 Mediator of RNA polymerase II transcription subunit 11, putative OS=Plasmodium falciparum (isolate 3D7) OX=36329 GN=PF3D7_0505900 PE=4 SV=1	1.64798	PF3D7_0505900
>tr|A0A143ZWW4|A0A143ZWW4_PLAF7 Calcium-dependent protein kinase 1 OS=Plasmodium falciparum (isolate 3D7) OX=36329 GN=PF3D7_0217500 PE=4 SV=1	1.64798	PF3D7_0217500
>sp|C0H4X5|DRE2_PLAF7 Anamorsin homolog OS=Plasmodium falciparum (isolate 3D7) OX=36329 GN=MAL8P1.31 PE=3 SV=1	1.64798	PF3D7_0824600
>tr|Q8IIW2|Q8IIW2_PLAF7 Phenylalanyl-tRNA synthetase beta subunit OS=Plasmodium falciparum (isolate 3D7) OX=36329 GN=PF3D7_1104000 PE=3 SV=1	1.63883	PF3D7_1104000
>tr|Q8IJN9|Q8IJN9_PLAF7 Heat shock protein 60 OS=Plasmodium falciparum (isolate 3D7) OX=36329 GN=PF3D7_1015600 PE=3 SV=1	1.63151	PF3D7_1015600
>tr|Q8I713|Q8I713_PLAF7 60S ribosomal protein L36 OS=Plasmodium falciparum (isolate 3D7) OX=36329 GN=PF3D7_1109900 PE=1 SV=2	1.63148	PF3D7_1109900
>tr|Q8ILE8|Q8ILE8_PLAF7 60S ribosomal protein L14, putative OS=Plasmodium falciparum (isolate 3D7) OX=36329 GN=PF3D7_1431700 PE=1 SV=1	1.61294	PF3D7_1431700
>tr|C6KSV3|C6KSV3_PLAF7 Transketolase OS=Plasmodium falciparum (isolate 3D7) OX=36329 GN=PF3D7_0610800 PE=3 SV=1	1.59922	PF3D7_0610800
>tr|Q8IDM2|Q8IDM2_PLAF7 Ethanolamine-phosphate cytidylyltransferase OS=Plasmodium falciparum (isolate 3D7) OX=36329 GN=PF3D7_1347700 PE=4 SV=1	1.58948	PF3D7_1347700
>tr|Q8I0U7|Q8I0U7_PLAF7 Proteasome subunit beta type-6, putative OS=Plasmodium falciparum (isolate 3D7) OX=36329 GN=PF3D7_0931800 PE=1 SV=1	1.58948	PF3D7_0931800
>tr|Q8IL13|Q8IL13_PLAF7 ATP-dependent RNA helicase DDX5, putative OS=Plasmodium falciparum (isolate 3D7) OX=36329 GN=PF3D7_1445900 PE=2 SV=2	1.58757	PF3D7_1445900
>tr|Q8IE82|Q8IE82_PLAF7 60S ribosomal protein L23 OS=Plasmodium falciparum (isolate 3D7) OX=36329 GN=PF3D7_1323400 PE=1 SV=1	1.58757	PF3D7_1323400
>tr|C6KT55|C6KT55_PLAF7 Nascent polypeptide-associated complex subunit alpha, putative OS=Plasmodium falciparum (isolate 3D7) OX=36329 GN=PF3D7_0621800 PE=4 SV=1	1.57339	PF3D7_0621800
>tr|Q8IBV2|Q8IBV2_PLAF7 Transcription elongation factor s-II, putative OS=Plasmodium falciparum (isolate 3D7) OX=36329 GN=PF3D7_0714500 PE=4 SV=1	1.57274	PF3D7_0714500
>tr|Q8IJC6|Q8IJC6_PLAF7 60S ribosomal protein L3 OS=Plasmodium falciparum (isolate 3D7) OX=36329 GN=PF3D7_1027800 PE=1 SV=1	1.56092	PF3D7_1027800
>tr|Q8IB66|Q8IB66_PLAF7 RNA-binding protein, putative OS=Plasmodium falciparum (isolate 3D7) OX=36329 GN=PF3D7_0823200 PE=4 SV=1	1.55921	PF3D7_0823200
>tr|Q8IM66|Q8IM66_PLAF7 26S proteasome regulatory subunit RPN6 OS=Plasmodium falciparum (isolate 3D7) OX=36329 GN=PF3D7_1402300 PE=3 SV=1	1.55539	PF3D7_1402300
>tr|Q8IEC8|Q8IEC8_PLAF7 Translocation protein SEC63, putative OS=Plasmodium falciparum (isolate 3D7) OX=36329 GN=PF3D7_1318800 PE=4 SV=1	1.55539	PF3D7_1318800
>tr|B9ZSJ6|B9ZSJ6_PLAF7 Phosphatidylinositol 4-kinase, putative OS=Plasmodium falciparum (isolate 3D7) OX=36329 GN=PF3D7_0419900 PE=4 SV=2	1.55539	PF3D7_0419900
>tr|Q8I3A9|Q8I3A9_PLAF7 GTPase-activating protein, putative OS=Plasmodium falciparum (isolate 3D7) OX=36329 GN=PF3D7_0904000 PE=4 SV=1	1.54826	PF3D7_0904000
>tr|Q8II60|Q8II60_PLAF7 26S protease regulatory subunit 6A, putative OS=Plasmodium falciparum (isolate 3D7) OX=36329 GN=PF3D7_1130400 PE=3 SV=1	1.54077	PF3D7_1130400
>tr|Q8IIB4|Q8IIB4_PLAF7 60S ribosomal protein L35, putative OS=Plasmodium falciparum (isolate 3D7) OX=36329 GN=PF3D7_1124900 PE=1 SV=2	1.53843	PF3D7_1124900
>tr|Q8II82|Q8II82_PLAF7 Prefoldin subunit 5, putative OS=Plasmodium falciparum (isolate 3D7) OX=36329 GN=PF3D7_1128100 PE=4 SV=1	1.53654	PF3D7_1128100
>tr|Q8IJX3|Q8IJX3_PLAF7 Single-strand telomeric DNA-binding protein GBP2, putative OS=Plasmodium falciparum (isolate 3D7) OX=36329 GN=PF3D7_1006800 PE=4 SV=1	1.52728	PF3D7_1006800
>tr|Q8I3R6|Q8I3R6_PLAF7 40S ribosomal protein S24 OS=Plasmodium falciparum (isolate 3D7) OX=36329 GN=PF3D7_0519400 PE=1 SV=1	1.52626	PF3D7_0519400
>tr|Q8IAY9|Q8IAY9_PLAF7 Importin subunit beta, putative OS=Plasmodium falciparum (isolate 3D7) OX=36329 GN=PF3D7_0815200 PE=4 SV=1	1.52453	PF3D7_0815200
>tr|Q8I0V3|Q8I0V3_PLAF7 60 kDa chaperonin OS=Plasmodium falciparum (isolate 3D7) OX=36329 GN=PF3D7_1232100 PE=3 SV=2	1.52066	PF3D7_1232100
>tr|Q8IKH8|Q8IKH8_PLAF7 40S ribosomal protein S3 OS=Plasmodium falciparum (isolate 3D7) OX=36329 GN=PF3D7_1465900 PE=1 SV=1	1.51493	PF3D7_1465900
>tr|C6KSR8|C6KSR8_PLAF7 Translation initiation factor IF-2, putative OS=Plasmodium falciparum (isolate 3D7) OX=36329 GN=PF3D7_0607000 PE=4 SV=1	1.51457	PF3D7_0607000
>tr|Q8IJ82|Q8IJ82_PLAF7 Derlin OS=Plasmodium falciparum (isolate 3D7) OX=36329 GN=PF3D7_1032500 PE=3 SV=1	1.50909	PF3D7_1032500
>tr|Q8IKA6|Q8IKA6_PLAF7 DnaJ protein, putative OS=Plasmodium falciparum (isolate 3D7) OX=36329 GN=PF3D7_1473200 PE=4 SV=1	1.50017	PF3D7_1473200
