# Supplementary material for: A Plasmodium falciparum MORC protein complex modulates epigenetic control of gene expression through interaction with heterochromatin
Source: eLife. 2024 Oct 16;12:RP92201. doi: 10.7554/eLife.92201 (PMC11483127; doi:10.7554/eLife.92201)
Supplement: Supplementary file 3. [file elife-92201-supp3.xlsx]

## Sheet: Sheet1
Supplementary File 3 - Gene Ontology (GO) Terms for proteins identified in PfMORC-GFP lysate and normalized to fold change > 1.5
ID	Name	Bgd count	Result count	Result gene list	Pct of bgd	Fold enrichment	Odds ratio	P-value	Benjamini	Bonferroni
GO:0006355	regulation of transcription, DNA-templated	84	9	PF3D7_0420300,PF3D7_0610900,PF3D7_0613800,PF3D7_1007700,PF3D7_1107800,PF3D7_1128100,PF3D7_1139300,PF3D7_1239200,PF3D7_1449500,	10.7	3.22	3.65	0.00172064	0.0617628	0.0653844
GO:0065003	protein-containing complex assembly	193	14	PF3D7_0110700,PF3D7_0310600,PF3D7_0405400,PF3D7_0527000,PF3D7_0528200,PF3D7_0803700,PF3D7_1027800,PF3D7_1130400,PF3D7_1203700,PF3D7_1206200,PF3D7_1248900,PF3D7_1308300,PF3D7_1323400,PF3D7_1402300,	7.3	2.18	2.4	0.0045617	0.0617628	0.173345
GO:0006913	nucleocytoplasmic transport	34	5	PF3D7_0627700,PF3D7_0706000,PF3D7_0815200,PF3D7_0910100,PF3D7_1459000,	14.7	4.42	5.15	0.00487601	0.0617628	0.185288
GO:0002181	cytoplasmic translation	37	5	PF3D7_0310600,PF3D7_0528200,PF3D7_1109900,PF3D7_1206200,PF3D7_1338200,	13.5	4.06	4.66	0.00705163	0.0662396	0.267962
GO:0006886	intracellular protein transport	166	12	PF3D7_0214100,PF3D7_0528100,PF3D7_0621800,PF3D7_0621900,PF3D7_0627700,PF3D7_0706000,PF3D7_0815200,PF3D7_0910100,PF3D7_1015600,PF3D7_1034700,PF3D7_1145100,PF3D7_1318800,	7.2	2.17	2.37	0.00871574	0.0662396	0.331198
GO:0006520	cellular amino acid metabolic process	87	7	PF3D7_0102900,PF3D7_0717700,PF3D7_0802000,PF3D7_1033100,PF3D7_1104000,PF3D7_1410200,PF3D7_1461900,	8	2.42	2.62	0.0248995	0.142431	0.946182
GO:0006790	sulfur compound metabolic process	51	5	PF3D7_0824600,PF3D7_0918900,PF3D7_1033100,PF3D7_1108500,PF3D7_1128500,	9.8	2.94	3.23	0.0262373	0.142431	0.997017
GO:0006351	transcription, DNA-templated	38	4	PF3D7_0215700,PF3D7_0318200,PF3D7_0610900,PF3D7_0714500,	10.5	3.16	3.48	0.0362158	0.172025	1
GO:0005634	nucleus	1519	104	PF3D7_0102900,PF3D7_0110700,PF3D7_0202000,PF3D7_0215700,PF3D7_0217500,PF3D7_0308200,PF3D7_0318200,PF3D7_0322900,PF3D7_0401800,PF3D7_0405400,PF3D7_0420300,PF3D7_0420400,PF3D7_0505500,PF3D7_0513600,PF3D7_0519400,PF3D7_0519800,PF3D7_0524400,PF3D7_0527000,PF3D7_0528100,PF3D7_0528200,PF3D7_0604500,PF3D7_0607000,PF3D7_0610800,PF3D7_0610900,PF3D7_0613800,PF3D7_0621800,PF3D7_0621900,PF3D7_0624600,PF3D7_0…	6.8	2.06	4.88	6.91e-20	1.52e-18	1.52e-18
GO:0005829	cytosol	385	30	PF3D7_0102900,PF3D7_0304200,PF3D7_0308200,PF3D7_0322900,PF3D7_0420400,PF3D7_0519400,PF3D7_0610800,PF3D7_0706000,PF3D7_0717700,PF3D7_0802000,PF3D7_1012900,PF3D7_1019000,PF3D7_1019400,PF3D7_1027800,PF3D7_1109900,PF3D7_1124900,PF3D7_1132200,PF3D7_1134800,PF3D7_1144000,PF3D7_1145100,PF3D7_1230700,PF3D7_1308300,PF3D7_1323400,PF3D7_1338200,PF3D7_1341300,PF3D7_1347700,PF3D7_1431700,PF3D7_1457200,PF3D7_1…	7.8	2.34	2.83	6.27e-06	6.9e-05	0.000137956
GO:0005840	ribosome	182	15	PF3D7_0322900,PF3D7_0519400,PF3D7_0610900,PF3D7_1019000,PF3D7_1019400,PF3D7_1027800,PF3D7_1109900,PF3D7_1124900,PF3D7_1144000,PF3D7_1308300,PF3D7_1323400,PF3D7_1338200,PF3D7_1341300,PF3D7_1431700,PF3D7_1465900,	8.2	2.48	2.79	0.000934483	0.00685287	0.0205586
GO:0005635	nuclear envelope	26	5	PF3D7_0627700,PF3D7_0706000,PF3D7_0815200,PF3D7_0910100,PF3D7_1230700,	19.2	5.78	7.12	0.00142782	0.00785301	0.031412
GO:0005764	lysosome	111	8	PF3D7_0709000,PF3D7_0813300,PF3D7_0814200,PF3D7_0920800,PF3D7_1006800,PF3D7_1012900,PF3D7_1015600,PF3D7_1232100,	7.2	2.16	2.33	0.0306225	0.134739	0.673696
GO:0005654	nucleoplasm	97	7	PF3D7_0215700,PF3D7_0318200,PF3D7_0610900,PF3D7_0714500,PF3D7_1230700,PF3D7_1330800,PF3D7_1407100,	7.2	2.17	2.32	0.0416793	0.143733	0.916945
GO:0031410	cytoplasmic vesicle	210	12	PF3D7_0214100,PF3D7_0709000,PF3D7_0813300,PF3D7_0814200,PF3D7_0920800,PF3D7_1006800,PF3D7_1012900,PF3D7_1015600,PF3D7_1134800,PF3D7_1145100,PF3D7_1230700,PF3D7_1232100,	5.7	1.72	1.83	0.0457331	0.143733	1
GO:0003723	RNA binding	628	54	PF3D7_0102900,PF3D7_0105200,PF3D7_0108300,PF3D7_0109200,PF3D7_0202000,PF3D7_0304200,PF3D7_0310600,PF3D7_0322900,PF3D7_0405400,PF3D7_0519400,PF3D7_0528200,PF3D7_0604500,PF3D7_0607000,PF3D7_0610900,PF3D7_0621900,PF3D7_0624600,PF3D7_0714500,PF3D7_0717700,PF3D7_0803700,PF3D7_0811600,PF3D7_0813300,PF3D7_0813400,PF3D7_0814200,PF3D7_0818800,PF3D7_0823200,PF3D7_0935800,PF3D7_1006800,PF3D7_1019000,PF3D7_1…	8.6	2.58	3.74	3.65e-12	9.84e-11	9.84e-11
GO:0003729	mRNA binding	119	19	PF3D7_0105200,PF3D7_0108300,PF3D7_0109200,PF3D7_0528200,PF3D7_0604500,PF3D7_0610900,PF3D7_0813400,PF3D7_0814200,PF3D7_0823200,PF3D7_1006800,PF3D7_1019000,PF3D7_1021900,PF3D7_1107300,PF3D7_1124900,PF3D7_1206200,PF3D7_1227100,PF3D7_1330800,PF3D7_1409800,PF3D7_1419700,	16	4.8	6.19	7.56e-09	1.02e-07	2.04e-07
GO:0003674	molecular function	821	52	PF3D7_0112200,PF3D7_0214100,PF3D7_0322900,PF3D7_0401800,PF3D7_0420300,PF3D7_0505500,PF3D7_0519400,PF3D7_0527000,PF3D7_0610800,PF3D7_0610900,PF3D7_0613800,PF3D7_0624600,PF3D7_0627700,PF3D7_0803700,PF3D7_0815200,PF3D7_0817500,PF3D7_0910100,PF3D7_0918900,PF3D7_0920800,PF3D7_1007700,PF3D7_1015600,PF3D7_1019400,PF3D7_1023900,PF3D7_1027800,PF3D7_1033100,PF3D7_1107800,PF3D7_1108500,PF3D7_1109900,PF3D7_1…	6.3	1.9	2.49	7.18e-07	6.47e-06	1.94e-05
GO:0005198	structural molecule activity	209	19	PF3D7_0214100,PF3D7_0322900,PF3D7_0519400,PF3D7_0610900,PF3D7_0803700,PF3D7_1019400,PF3D7_1027800,PF3D7_1109900,PF3D7_1124900,PF3D7_1144000,PF3D7_1145100,PF3D7_1230700,PF3D7_1308300,PF3D7_1323400,PF3D7_1338200,PF3D7_1341300,PF3D7_1402300,PF3D7_1431700,PF3D7_1465900,	9.1	2.73	3.19	5.04e-05	0.00030439	0.00135969
GO:0003700	DNA-binding transcription factor activity	42	8	PF3D7_0401800,PF3D7_0420300,PF3D7_0613800,PF3D7_1007700,PF3D7_1107800,PF3D7_1139300,PF3D7_1239200,PF3D7_1449500,	19	5.72	7.17	5.64e-05	0.00030439	0.00152195
GO:0003677	DNA binding	202	17	PF3D7_0215700,PF3D7_0308000,PF3D7_0318200,PF3D7_0420300,PF3D7_0527000,PF3D7_0613800,PF3D7_0624600,PF3D7_0814200,PF3D7_1006800,PF3D7_1007700,PF3D7_1023900,PF3D7_1107800,PF3D7_1139300,PF3D7_1216900,PF3D7_1239200,PF3D7_1442100,PF3D7_1449500,	8.4	2.53	2.89	0.000329783	0.00148403	0.00890415
GO:0003735	structural constituent of ribosome	163	14	PF3D7_0322900,PF3D7_0519400,PF3D7_0610900,PF3D7_1019400,PF3D7_1027800,PF3D7_1109900,PF3D7_1124900,PF3D7_1144000,PF3D7_1308300,PF3D7_1323400,PF3D7_1338200,PF3D7_1341300,PF3D7_1431700,PF3D7_1465900,	8.6	2.58	2.91	0.000926338	0.00357302	0.0250111
GO:0051082	unfolded protein binding	65	7	PF3D7_0110700,PF3D7_0308200,PF3D7_0621800,PF3D7_1128100,PF3D7_1132200,PF3D7_1232100,PF3D7_1318800,	10.8	3.23	3.63	0.00543106	0.0183298	0.146639
GO:0008135	translation factor activity, RNA binding	94	8	PF3D7_0310600,PF3D7_0528200,PF3D7_0607000,PF3D7_0610900,PF3D7_0714500,PF3D7_1019000,PF3D7_1107300,PF3D7_1206200,	8.5	2.56	2.8	0.0123655	0.0370965	0.333869
