# Supplementary material for: A Plasmodium falciparum MORC protein complex modulates epigenetic control of gene expression through interaction with heterochromatin
Source: eLife. 2024 Oct 16;12:RP92201. doi: 10.7554/eLife.92201 (PMC11483127; doi:10.7554/eLife.92201)
Supplement: Supplementary file 4. — Putative gene targets of PfMORC were defined as genes with peaks within 2 kb upstream of the gene target ATG start codon or peaks within gene bodies. In a situation with any peaks between gene targets in a head-to-head orientation, the closest gene was chosen. [file elife-92201-supp4.xlsx]

## Sheet: MORC_Gene_Targets_30hpi
#Supplementary File 4
#Gene IDs and annotations for gene targets of PfMORC at 30hpi and 40hpi determined by ChIP-seq genome-wide occupancy
#Putative gene targets of PfMORC were defined as genes with peaks within 2 kb upstream of the gene target ATG start codon or peaks within gene bodies. In a situation with any peaks between gene targets in a head-to-head orientation, the closest gene was chosen
PF3D7_0100100	erythrocyte membrane protein 1, PfEMP1
PF3D7_0108900	non-coding RNA
PF3D7_0109000	photosensitized INA-labeled protein PHIL1
PF3D7_0113600	surface-associated interspersed protein 1.2 (SURFIN 1.2), pseudogene
PF3D7_0115700	erythrocyte membrane protein 1, PfEMP1
PF3D7_0200100	erythrocyte membrane protein 1, PfEMP1
PF3D7_0201900	erythrocyte membrane protein 3
PF3D7_0202000	knob-associated histidine-rich protein
PF3D7_0206300	pentafunctional AROM polypeptide, putative, pseudogene
PF3D7_0215300	acyl-CoA synthetase
PF3D7_0220000	liver stage antigen 3
PF3D7_0220300	Plasmodium exported protein, unknown function
PF3D7_0223500	erythrocyte membrane protein 1, PfEMP1
PF3D7_0300100	erythrocyte membrane protein 1, PfEMP1
PF3D7_0301800	Plasmodium exported protein, unknown function
PF3D7_0310200	phd finger protein, putative
PF3D7_0312600	tRNA Valine
PF3D7_0324900	erythrocyte membrane protein 1, PfEMP1
PF3D7_0400100	erythrocyte membrane protein 1, PfEMP1
PF3D7_0402900	probable protein, unknown function
PF3D7_0403000	tRNA Asparagine
PF3D7_0404600	conserved Plasmodium membrane protein, unknown function
PF3D7_0407600	conserved Plasmodium protein, unknown function
PF3D7_0410000	erythrocyte vesicle protein 1
PF3D7_0410100	tRNA Serine
PF3D7_0421200	rifin
PF3D7_0423700	early transcribed membrane protein 4
PF3D7_0426000	erythrocyte membrane protein 1, PfEMP1
PF3D7_0501400	interspersed repeat antigen
PF3D7_0501600	rhoptry-associated protein 2
PF3D7_0526600	conserved Plasmodium protein, unknown function
PF3D7_0527600	conserved Plasmodium protein, unknown function
PF3D7_0527700	tRNA Glutamic acid
PF3D7_0529600	tRNA Arginine
PF3D7_0532000	28S ribosomal RNA
PF3D7_0532100	early transcribed membrane protein 5
PF3D7_0601900	conserved Plasmodium protein, unknown function
PF3D7_0604100	AP2 domain transcription factor
PF3D7_0604200	ribosomal protein L41, mitochondrial, putative
PF3D7_0606300	conserved Plasmodium protein, unknown function
PF3D7_0613600	conserved Plasmodium protein, unknown function
PF3D7_0620700	DnaJ protein, putative
PF3D7_0620800	tRNA Alanine
PF3D7_0621000	conserved Plasmodium protein, unknown function
PF3D7_0628100	HECT domain-containing protein 1, putative
PF3D7_0700100	erythrocyte membrane protein 1, PfEMP1
PF3D7_0702400	small exported membrane protein 1
PF3D7_0702500	Plasmodium exported protein, unknown function
PF3D7_0702800	tRNA Tyrosine
PF3D7_0706800	tRNA Threonine
PF3D7_0707000	tRNA Lysine
PF3D7_0714700	tRNA Asparagine
PF3D7_0714800	tRNA Leucine
PF3D7_0715000	4-nitrophenylphosphatase
PF3D7_0725600	18S ribosomal RNA
PF3D7_0725800	5.8S ribosomal RNA
PF3D7_0726000	28S ribosomal RNA
PF3D7_0726300	DNA mismatch repair protein PMS1, putative
PF3D7_0730600	tRNA Valine
PF3D7_0730800	Plasmodium exported protein, unknown function
PF3D7_0730900	EMP1-trafficking protein
PF3D7_0733000	erythrocyte membrane protein 1, PfEMP1
PF3D7_0800100	erythrocyte membrane protein 1, PfEMP1
PF3D7_0801000	Plasmodium exported protein (PHISTc)
PF3D7_0801100	28S ribosomal RNA
PF3D7_0801800	mannose-6-phosphate isomerase, putative
PF3D7_0801900	lysine-specific histone demethylase, putative
PF3D7_0822900	PhIL1-interacting candidate PIC2
PF3D7_0829400	prolyl 4-hydroxylase subunit alpha, putative
PF3D7_0830500	sporozoite and liver stage tryptophan-rich protein, putative
PF3D7_0831700	heat shock protein 70
PF3D7_0833500	erythrocyte membrane protein 1, PfEMP1
PF3D7_0900100	erythrocyte membrane protein 1, PfEMP1
PF3D7_0904600	ubiquitin specific protease, putative
PF3D7_0905400	high molecular weight rhoptry protein 3
PF3D7_0905500	conserved protein, unknown function
PF3D7_0914300	met-10+ like protein, putative
PF3D7_0914400	protein KIC3
PF3D7_0919200	PPPDE peptidase, putative
PF3D7_0919300	thioredoxin-like protein 1, putative
PF3D7_0931300	conserved Plasmodium protein, unknown function
PF3D7_0935600	gametocytogenesis-implicated protein
PF3D7_0937800	erythrocyte membrane protein 1, PfEMP1
PF3D7_1000100	erythrocyte membrane protein 1, PfEMP1
PF3D7_1003500	40S ribosomal protein S20e, putative
PF3D7_1003600	inner membrane complex protein 1c, putative
PF3D7_1016300	GBP130 protein
PF3D7_1019300	zinc finger protein, putative
PF3D7_1019400	60S ribosomal protein L30e, putative
PF3D7_1035700	duffy binding-like merozoite surface protein
PF3D7_1041300	erythrocyte membrane protein 1, PfEMP1
PF3D7_1102800	early transcribed membrane protein 11.2
PF3D7_1103200	tRNA Glycine
PF3D7_1103400	iron-sulfur cluster assembly protein SufD
PF3D7_1121300	tyrosine kinase-like protein
PF3D7_1121400	WD repeat-containing protein, putative
PF3D7_1121600	exported protein 1
PF3D7_1121700	protein GCN20
PF3D7_1126700	conserved Plasmodium protein, unknown function
PF3D7_1136800	DnaJ protein, putative
PF3D7_1136900	subtilisin-like protease 2
PF3D7_1137100	ribosomal protein S9, mitochondrial, putative
PF3D7_1140300	P-loop containing nucleoside triphosphate hydrolase, putative
PF3D7_1140400	conserved Plasmodium protein, unknown function
PF3D7_1200100	erythrocyte membrane protein 1, PfEMP1
PF3D7_1204300	eukaryotic translation initiation factor 5A
PF3D7_1206800	conserved Plasmodium protein, unknown function
PF3D7_1213200	mediator of RNA polymerase II transcription subunit 18, putative
PF3D7_1216800	tRNA Proline
PF3D7_1216900	DNA-binding chaperone, putative
PF3D7_1219300	erythrocyte membrane protein 1, PfEMP1
PF3D7_1221300	conserved Plasmodium protein, unknown function
PF3D7_1221400	inner membrane complex protein 1h, putative
PF3D7_1222700	glideosome-associated protein 45
PF3D7_1226000	conserved protein, unknown function
PF3D7_1226100	haloacid dehalogenase-like hydrolase, putative
PF3D7_1228600	merozoite surface protein 9
PF3D7_1228700	conserved Plasmodium protein, unknown function
PF3D7_1240400	erythrocyte membrane protein 1, PfEMP1
PF3D7_1244200	RNA polymerase II transcription factor B subunit 2, putative
PF3D7_1244300	ACEA small nucleolar RNA U3
PF3D7_1244400	RNA-binding protein, putative
PF3D7_1302000	EMP1-trafficking protein
PF3D7_1310700	PhIL1-interacting candidate PIC5
PF3D7_1324800	dihydrofolate synthase/folylpolyglutamate synthase
PF3D7_1324900	L-lactate dehydrogenase
PF3D7_1335100	merozoite surface protein 7
PF3D7_1339000	conserved Plasmodium protein, unknown function
PF3D7_1339100	tRNA Methionine
PF3D7_1342900	AP2 domain transcription factor AP2-HS
PF3D7_1343000	phosphoethanolamine N-methyltransferase
PF3D7_1370000	tRNA Arginine
PF3D7_1370100	tRNA Cysteine
PF3D7_1370200	tRNA Glycine
PF3D7_1373500	erythrocyte membrane protein 1, PfEMP1
PF3D7_1401500	esterase, putative
PF3D7_1404700	cysteine-rich small secreted protein CSS, putative
PF3D7_1408300	conserved Plasmodium protein, unknown function
PF3D7_1418500	5S ribosomal RNA
PF3D7_1418600	5S ribosomal RNA
PF3D7_1418700	5S ribosomal RNA
PF3D7_1430100	serine/threonine protein phosphatase 2A activator
PF3D7_1430200	plasmepsin IX
PF3D7_1456800	V-type H(+)-translocating pyrophosphatase, putative
PF3D7_1456900	conserved protein, unknown function
PF3D7_1462800	glyceraldehyde-3-phosphate dehydrogenase
PF3D7_1466400	AP2 domain transcription factor AP2-EXP
PF3D7_1473700	nucleoporin NUP116/NSP116, putative
PF3D7_1473900	conserved Plasmodium protein, unknown function

## Sheet: MORC_Gene_Targets_40hpi
#Supplementary File 4:
#Gene IDs and annotations for gene targets of PfMORC at 30hpi and 40hpi determined by ChIP-seq genome-wide occupancy
#Putative gene targets of PfMORC were defined as genes with peaks within 2 kb upstream of the gene target ATG start codon or peaks within gene bodies. In a situation with any peaks between gene targets in a head-to-head orientation, the closest gene was chosen
PF3D7_0100100	erythrocyte membrane protein 1, PfEMP1
PF3D7_0108900	non-coding RNA
PF3D7_0109000	photosensitized INA-labeled protein PHIL1
PF3D7_0113600	surface-associated interspersed protein 1.2 (SURFIN 1.2), pseudogene
PF3D7_0115700	erythrocyte membrane protein 1, PfEMP1
PF3D7_0200100	erythrocyte membrane protein 1, PfEMP1
PF3D7_0220300	Plasmodium exported protein, unknown function
PF3D7_0223500	erythrocyte membrane protein 1, PfEMP1
PF3D7_0300100	erythrocyte membrane protein 1, PfEMP1
PF3D7_0301800	Plasmodium exported protein, unknown function
PF3D7_0310200	phd finger protein, putative
PF3D7_0324900	erythrocyte membrane protein 1, PfEMP1
PF3D7_0400100	erythrocyte membrane protein 1, PfEMP1
PF3D7_0402900	probable protein, unknown function
PF3D7_0403000	tRNA Asparagine
PF3D7_0410000	erythrocyte vesicle protein 1
PF3D7_0410100	tRNA Serine
PF3D7_0421200	rifin
PF3D7_0426000	erythrocyte membrane protein 1, PfEMP1
PF3D7_0501600	rhoptry-associated protein 2
PF3D7_0508800	single-stranded DNA-binding protein
PF3D7_0508900	protein AAP6
PF3D7_0527600	conserved Plasmodium protein, unknown function
PF3D7_0527700	tRNA Glutamic acid
PF3D7_0532100	early transcribed membrane protein 5
PF3D7_0604100	AP2 domain transcription factor
PF3D7_0604200	ribosomal protein L41, mitochondrial, putative
PF3D7_0613600	conserved Plasmodium protein, unknown function
PF3D7_0620700	DnaJ protein, putative
PF3D7_0620800	tRNA Alanine
PF3D7_0621000	conserved Plasmodium protein, unknown function
PF3D7_0628100	HECT domain-containing protein 1, putative
PF3D7_0700100	erythrocyte membrane protein 1, PfEMP1
PF3D7_0707000	tRNA Lysine
PF3D7_0712300	erythrocyte membrane protein 1, PfEMP1
PF3D7_0715000	4-nitrophenylphosphatase
PF3D7_0725600	18S ribosomal RNA
PF3D7_0725800	5.8S ribosomal RNA
PF3D7_0726000	28S ribosomal RNA
PF3D7_0726300	DNA mismatch repair protein PMS1, putative
PF3D7_0730800	Plasmodium exported protein, unknown function
PF3D7_0733000	erythrocyte membrane protein 1, PfEMP1
PF3D7_0800100	erythrocyte membrane protein 1, PfEMP1
PF3D7_0822900	PhIL1-interacting candidate PIC2
PF3D7_0833500	erythrocyte membrane protein 1, PfEMP1
PF3D7_0900100	erythrocyte membrane protein 1, PfEMP1
PF3D7_0904600	ubiquitin specific protease, putative
PF3D7_0905400	high molecular weight rhoptry protein 3
PF3D7_0905500	conserved protein, unknown function
PF3D7_0914300	met-10+ like protein, putative
PF3D7_0914400	protein KIC3
PF3D7_0918000	glideosome-associated protein 50
PF3D7_0918100	cytochrome b5-like heme/steroid binding protein, putative
PF3D7_0930300	merozoite surface protein 1
PF3D7_0937800	erythrocyte membrane protein 1, PfEMP1
PF3D7_1000100	erythrocyte membrane protein 1, PfEMP1
PF3D7_1003500	40S ribosomal protein S20e, putative
PF3D7_1003600	inner membrane complex protein 1c, putative
PF3D7_1014900	protein KIC8
PF3D7_1015000	FAD synthetase, putative
PF3D7_1018200	serine/threonine protein phosphatase 8, putative
PF3D7_1041300	erythrocyte membrane protein 1, PfEMP1
PF3D7_1103400	iron-sulfur cluster assembly protein SufD
PF3D7_1121300	tyrosine kinase-like protein
PF3D7_1121400	WD repeat-containing protein, putative
PF3D7_1121600	exported protein 1
PF3D7_1121700	protein GCN20
PF3D7_1126700	conserved Plasmodium protein, unknown function
PF3D7_1136800	DnaJ protein, putative
PF3D7_1136900	subtilisin-like protease 2
PF3D7_1140300	P-loop containing nucleoside triphosphate hydrolase, putative
PF3D7_1140400	conserved Plasmodium protein, unknown function
PF3D7_1200100	erythrocyte membrane protein 1, PfEMP1
PF3D7_1204300	eukaryotic translation initiation factor 5A
PF3D7_1216800	tRNA Proline
PF3D7_1216900	DNA-binding chaperone, putative
PF3D7_1219300	erythrocyte membrane protein 1, PfEMP1
PF3D7_1221300	conserved Plasmodium protein, unknown function
PF3D7_1221400	inner membrane complex protein 1h, putative
PF3D7_1222700	glideosome-associated protein 45
PF3D7_1223100	cAMP-dependent protein kinase regulatory subunit
PF3D7_1223200	nucleus export protein BRR6, putative
PF3D7_1228600	merozoite surface protein 9
PF3D7_1228700	conserved Plasmodium protein, unknown function
PF3D7_1240400	erythrocyte membrane protein 1, PfEMP1
PF3D7_1335100	merozoite surface protein 7
PF3D7_1339000	conserved Plasmodium protein, unknown function
PF3D7_1339100	tRNA Methionine
PF3D7_1350500	conserved Plasmodium protein, unknown function
PF3D7_1350600	conserved Plasmodium protein, unknown function
PF3D7_1351700	inner membrane complex protein 1f, putative
PF3D7_1356800	serine/threonine protein kinase ARK3, putative
PF3D7_1373500	erythrocyte membrane protein 1, PfEMP1
PF3D7_1416600	conserved Plasmodium protein, unknown function
PF3D7_1418700	5S ribosomal RNA
PF3D7_1430100	serine/threonine protein phosphatase 2A activator
PF3D7_1430200	plasmepsin IX
PF3D7_1439400	cytochrome b-c1 complex subunit Rieske, putative
PF3D7_1439500	oocyst rupture protein 2, putative
PF3D7_1466400	AP2 domain transcription factor AP2-EXP
PF3D7_1473700	nucleoporin NUP116/NSP116, putative
PF3D7_1473900	conserved Plasmodium protein, unknown function

## Sheet: MORC_30hpi_Cluster1
#Supplementary File 4:
#Gene IDs and annotations for gene targets of PfMORC at 30hpi and 40hpi determined by ChIP-seq genome-wide occupancy
#Putative gene targets of PfMORC were defined as genes with peaks within 2 kb upstream of the gene target ATG start codon or peaks within gene bodies. In a situation with any peaks between gene targets in a head-to-head orientation, the closest gene was chosen
PF3D7_0100100	erythrocyte membrane protein 1, PfEMP1
PF3D7_0108900	non-coding RNA
PF3D7_0109000	photosensitized INA-labeled protein PHIL1
PF3D7_0113600	surface-associated interspersed protein 1.2 (SURFIN 1.2), pseudogene
PF3D7_0115700	erythrocyte membrane protein 1, PfEMP1
PF3D7_0215300	acyl-CoA synthetase
PF3D7_0220000	liver stage antigen 3
PF3D7_0223500	erythrocyte membrane protein 1, PfEMP1
PF3D7_0300100	erythrocyte membrane protein 1, PfEMP1
PF3D7_0301800	Plasmodium exported protein, unknown function
PF3D7_0324900	erythrocyte membrane protein 1, PfEMP1
PF3D7_0400100	erythrocyte membrane protein 1, PfEMP1
PF3D7_0402900	probable protein, unknown function
PF3D7_0403000	tRNA Asparagine
PF3D7_0410000	erythrocyte vesicle protein 1
PF3D7_0410100	tRNA Serine
PF3D7_0421200	rifin
PF3D7_0423700	early transcribed membrane protein 4
PF3D7_0426000	erythrocyte membrane protein 1, PfEMP1
PF3D7_0501400	interspersed repeat antigen
PF3D7_0501600	rhoptry-associated protein 2
PF3D7_0527700	tRNA Glutamic acid
PF3D7_0532000	28S ribosomal RNA
PF3D7_0604100	AP2 domain transcription factor
PF3D7_0606300	conserved Plasmodium protein, unknown function
PF3D7_0613600	conserved Plasmodium protein, unknown function
PF3D7_0620700	DnaJ protein, putative
PF3D7_0620800	tRNA Alanine
PF3D7_0628100	HECT domain-containing protein 1, putative
PF3D7_0700100	erythrocyte membrane protein 1, PfEMP1
PF3D7_0702800	tRNA Tyrosine
PF3D7_0706800	tRNA Threonine
PF3D7_0707000	tRNA Lysine
PF3D7_0714800	tRNA Leucine
PF3D7_0726000	28S ribosomal RNA
PF3D7_0726300	DNA mismatch repair protein PMS1, putative
PF3D7_0730600	tRNA Valine
PF3D7_0730800	Plasmodium exported protein, unknown function
PF3D7_0800100	erythrocyte membrane protein 1, PfEMP1
PF3D7_0822900	PhIL1-interacting candidate PIC2
PF3D7_0829400	prolyl 4-hydroxylase subunit alpha, putative
PF3D7_0830500	sporozoite and liver stage tryptophan-rich protein, putative
PF3D7_0905400	high molecular weight rhoptry protein 3
PF3D7_0905500	conserved protein, unknown function
PF3D7_0914400	protein KIC3
PF3D7_0919200	PPPDE peptidase, putative
PF3D7_0919300	thioredoxin-like protein 1, putative
PF3D7_0935600	gametocytogenesis-implicated protein
PF3D7_0937800	erythrocyte membrane protein 1, PfEMP1
PF3D7_1000100	erythrocyte membrane protein 1, PfEMP1
PF3D7_1003600	inner membrane complex protein 1c, putative
PF3D7_1019300	zinc finger protein, putative
PF3D7_1035700	duffy binding-like merozoite surface protein
PF3D7_1102800	early transcribed membrane protein 11.2
PF3D7_1103200	tRNA Glycine
PF3D7_1121300	tyrosine kinase-like protein
PF3D7_1121400	WD repeat-containing protein, putative
PF3D7_1126700	conserved Plasmodium protein, unknown function
PF3D7_1136900	subtilisin-like protease 2
PF3D7_1140300	P-loop containing nucleoside triphosphate hydrolase, putative
PF3D7_1140400	conserved Plasmodium protein, unknown function
PF3D7_1200100	erythrocyte membrane protein 1, PfEMP1
PF3D7_1221300	conserved Plasmodium protein, unknown function
PF3D7_1221400	inner membrane complex protein 1h, putative
PF3D7_1222700	glideosome-associated protein 45
PF3D7_1228600	merozoite surface protein 9
PF3D7_1228700	conserved Plasmodium protein, unknown function
PF3D7_1310700	PhIL1-interacting candidate PIC5
PF3D7_1335100	merozoite surface protein 7
PF3D7_1370000	tRNA Arginine
PF3D7_1370100	tRNA Cysteine
PF3D7_1370200	tRNA Glycine
PF3D7_1404700	cysteine-rich small secreted protein CSS, putative
PF3D7_1408300	conserved Plasmodium protein, unknown function
PF3D7_1418600	5S ribosomal RNA
PF3D7_1430200	plasmepsin IX

## Sheet: MORC_30hpi_Cluster2
#Supplementary File 4:
#Gene IDs and annotations for gene targets of PfMORC at 30hpi and 40hpi determined by ChIP-seq genome-wide occupancy
#Putative gene targets of PfMORC were defined as genes with peaks within 2 kb upstream of the gene target ATG start codon or peaks within gene bodies. In a situation with any peaks between gene targets in a head-to-head orientation, the closest gene was chosen
PF3D7_0200100	erythrocyte membrane protein 1, PfEMP1
PF3D7_0201900	erythrocyte membrane protein 3
PF3D7_0202000	knob-associated histidine-rich protein
PF3D7_0206300	pentafunctional AROM polypeptide, putative, pseudogene
PF3D7_0220300	Plasmodium exported protein, unknown function
PF3D7_0310200	phd finger protein, putative
PF3D7_0312600	tRNA Valine
PF3D7_0404600	conserved Plasmodium membrane protein, unknown function
PF3D7_0407600	conserved Plasmodium protein, unknown function
PF3D7_0526600	conserved Plasmodium protein, unknown function
PF3D7_0527600	conserved Plasmodium protein, unknown function
PF3D7_0529600	tRNA Arginine
PF3D7_0532100	early transcribed membrane protein 5
PF3D7_0601900	conserved Plasmodium protein, unknown function
PF3D7_0604200	ribosomal protein L41, mitochondrial, putative
PF3D7_0621000	conserved Plasmodium protein, unknown function
PF3D7_0702400	small exported membrane protein 1
PF3D7_0702500	Plasmodium exported protein, unknown function
PF3D7_0714700	tRNA Asparagine
PF3D7_0715000	4-nitrophenylphosphatase
PF3D7_0725600	18S ribosomal RNA
PF3D7_0725800	5.8S ribosomal RNA
PF3D7_0730900	EMP1-trafficking protein
PF3D7_0733000	erythrocyte membrane protein 1, PfEMP1
PF3D7_0801000	Plasmodium exported protein (PHISTc)
PF3D7_0801100	28S ribosomal RNA
PF3D7_0801800	mannose-6-phosphate isomerase, putative
PF3D7_0801900	lysine-specific histone demethylase, putative
PF3D7_0831700	heat shock protein 70
PF3D7_0833500	erythrocyte membrane protein 1, PfEMP1
PF3D7_0900100	erythrocyte membrane protein 1, PfEMP1
PF3D7_0904600	ubiquitin specific protease, putative
PF3D7_0914300	met-10+ like protein, putative
PF3D7_0931300	conserved Plasmodium protein, unknown function
PF3D7_1003500	40S ribosomal protein S20e, putative
PF3D7_1016300	GBP130 protein
PF3D7_1019400	60S ribosomal protein L30e, putative
PF3D7_1041300	erythrocyte membrane protein 1, PfEMP1
PF3D7_1103400	iron-sulfur cluster assembly protein SufD
PF3D7_1121600	exported protein 1
PF3D7_1121700	protein GCN20
PF3D7_1136800	DnaJ protein, putative
PF3D7_1137100	ribosomal protein S9, mitochondrial, putative
PF3D7_1204300	eukaryotic translation initiation factor 5A
PF3D7_1206800	conserved Plasmodium protein, unknown function
PF3D7_1213200	mediator of RNA polymerase II transcription subunit 18, putative
PF3D7_1216800	tRNA Proline
PF3D7_1216900	DNA-binding chaperone, putative
PF3D7_1219300	erythrocyte membrane protein 1, PfEMP1
PF3D7_1226000	conserved protein, unknown function
PF3D7_1226100	haloacid dehalogenase-like hydrolase, putative
PF3D7_1240400	erythrocyte membrane protein 1, PfEMP1
PF3D7_1244200	RNA polymerase II transcription factor B subunit 2, putative
PF3D7_1244300	ACEA small nucleolar RNA U3
PF3D7_1244400	RNA-binding protein, putative
PF3D7_1302000	EMP1-trafficking protein
PF3D7_1324800	dihydrofolate synthase/folylpolyglutamate synthase
PF3D7_1324900	L-lactate dehydrogenase
PF3D7_1339000	conserved Plasmodium protein, unknown function
PF3D7_1339100	tRNA Methionine
PF3D7_1342900	AP2 domain transcription factor AP2-HS
PF3D7_1343000	phosphoethanolamine N-methyltransferase
PF3D7_1373500	erythrocyte membrane protein 1, PfEMP1
PF3D7_1401500	esterase, putative
PF3D7_1418500	5S ribosomal RNA
PF3D7_1418700	5S ribosomal RNA
PF3D7_1430100	serine/threonine protein phosphatase 2A activator
PF3D7_1456800	V-type H(+)-translocating pyrophosphatase, putative
PF3D7_1456900	conserved protein, unknown function
PF3D7_1462800	glyceraldehyde-3-phosphate dehydrogenase
PF3D7_1466400	AP2 domain transcription factor AP2-EXP
PF3D7_1473700	nucleoporin NUP116/NSP116, putative
PF3D7_1473900	conserved Plasmodium protein, unknown function

## Sheet: MORC_40hpi_Cluster1
#Supplementary File 4:
#Gene IDs and annotations for gene targets of PfMORC at 30hpi and 40hpi determined by ChIP-seq genome-wide occupancy
#Putative gene targets of PfMORC were defined as genes with peaks within 2 kb upstream of the gene target ATG start codon or peaks within gene bodies. In a situation with any peaks between gene targets in a head-to-head orientation, the closest gene was chosen
PF3D7_0100100	erythrocyte membrane protein 1, PfEMP1
PF3D7_0108900	non-coding RNA
PF3D7_0109000	photosensitized INA-labeled protein PHIL1
PF3D7_0301800	Plasmodium exported protein, unknown function
PF3D7_0324900	erythrocyte membrane protein 1, PfEMP1
PF3D7_0400100	erythrocyte membrane protein 1, PfEMP1
PF3D7_0403000	tRNA Asparagine
PF3D7_0410100	tRNA Serine
PF3D7_0421200	rifin
PF3D7_0501600	rhoptry-associated protein 2
PF3D7_0508800	single-stranded DNA-binding protein
PF3D7_0508900	protein AAP6
PF3D7_0527600	conserved Plasmodium protein, unknown function
PF3D7_0527700	tRNA Glutamic acid
PF3D7_0604100	AP2 domain transcription factor
PF3D7_0613600	conserved Plasmodium protein, unknown function
PF3D7_0620700	DnaJ protein, putative
PF3D7_0620800	tRNA Alanine
PF3D7_0628100	HECT domain-containing protein 1, putative
PF3D7_0726000	28S ribosomal RNA
PF3D7_0726300	DNA mismatch repair protein PMS1, putative
PF3D7_0800100	erythrocyte membrane protein 1, PfEMP1
PF3D7_0822900	PhIL1-interacting candidate PIC2
PF3D7_0905400	high molecular weight rhoptry protein 3
PF3D7_0905500	conserved protein, unknown function
PF3D7_0914400	protein KIC3
PF3D7_0918000	glideosome-associated protein 50
PF3D7_0918100	cytochrome b5-like heme/steroid binding protein, putative
PF3D7_0930300	merozoite surface protein 1
PF3D7_1000100	erythrocyte membrane protein 1, PfEMP1
PF3D7_1003600	inner membrane complex protein 1c, putative
PF3D7_1014900	protein KIC8
PF3D7_1015000	FAD synthetase, putative
PF3D7_1018200	serine/threonine protein phosphatase 8, putative
PF3D7_1103400	iron-sulfur cluster assembly protein SufD
PF3D7_1121300	tyrosine kinase-like protein
PF3D7_1126700	conserved Plasmodium protein, unknown function
PF3D7_1136900	subtilisin-like protease 2
PF3D7_1140300	P-loop containing nucleoside triphosphate hydrolase, putative
PF3D7_1140400	conserved Plasmodium protein, unknown function
PF3D7_1200100	erythrocyte membrane protein 1, PfEMP1
PF3D7_1216800	tRNA Proline
PF3D7_1221300	conserved Plasmodium protein, unknown function
PF3D7_1222700	glideosome-associated protein 45
PF3D7_1223100	cAMP-dependent protein kinase regulatory subunit
PF3D7_1228600	merozoite surface protein 9
PF3D7_1228700	conserved Plasmodium protein, unknown function
PF3D7_1335100	merozoite surface protein 7
PF3D7_1351700	inner membrane complex protein 1f, putative
PF3D7_1356800	serine/threonine protein kinase ARK3, putative
PF3D7_1430200	plasmepsin IX
PF3D7_1439400	cytochrome b-c1 complex subunit Rieske, putative
PF3D7_1439500	oocyst rupture protein 2, putative

## Sheet: MORC_40hpi_Cluster2
#Supplementary File 4:
#Gene IDs and annotations for gene targets of PfMORC at 30hpi and 40hpi determined by ChIP-seq genome-wide occupancy
#Putative gene targets of PfMORC were defined as genes with peaks within 2 kb upstream of the gene target ATG start codon or peaks within gene bodies. In a situation with any peaks between gene targets in a head-to-head orientation, the closest gene was chosen
PF3D7_0113600	surface-associated interspersed protein 1.2 (SURFIN 1.2), pseudogene
PF3D7_0115700	erythrocyte membrane protein 1, PfEMP1
PF3D7_0200100	erythrocyte membrane protein 1, PfEMP1
PF3D7_0220300	Plasmodium exported protein, unknown function
PF3D7_0223500	erythrocyte membrane protein 1, PfEMP1
PF3D7_0300100	erythrocyte membrane protein 1, PfEMP1
PF3D7_0310200	phd finger protein, putative
PF3D7_0402900	probable protein, unknown function
PF3D7_0410000	erythrocyte vesicle protein 1
PF3D7_0426000	erythrocyte membrane protein 1, PfEMP1
PF3D7_0532100	early transcribed membrane protein 5
PF3D7_0604200	ribosomal protein L41, mitochondrial, putative
PF3D7_0621000	conserved Plasmodium protein, unknown function
PF3D7_0700100	erythrocyte membrane protein 1, PfEMP1
PF3D7_0707000	tRNA Lysine
PF3D7_0712300	erythrocyte membrane protein 1, PfEMP1
PF3D7_0715000	4-nitrophenylphosphatase
PF3D7_0725600	18S ribosomal RNA
PF3D7_0725800	5.8S ribosomal RNA
PF3D7_0730800	Plasmodium exported protein, unknown function
PF3D7_0733000	erythrocyte membrane protein 1, PfEMP1
PF3D7_0833500	erythrocyte membrane protein 1, PfEMP1
PF3D7_0900100	erythrocyte membrane protein 1, PfEMP1
PF3D7_0904600	ubiquitin specific protease, putative
PF3D7_0914300	met-10+ like protein, putative
PF3D7_0937800	erythrocyte membrane protein 1, PfEMP1
PF3D7_1003500	40S ribosomal protein S20e, putative
PF3D7_1041300	erythrocyte membrane protein 1, PfEMP1
PF3D7_1121400	WD repeat-containing protein, putative
PF3D7_1121600	exported protein 1
PF3D7_1121700	protein GCN20
PF3D7_1136800	DnaJ protein, putative
PF3D7_1204300	eukaryotic translation initiation factor 5A
PF3D7_1216900	DNA-binding chaperone, putative
PF3D7_1219300	erythrocyte membrane protein 1, PfEMP1
PF3D7_1221400	inner membrane complex protein 1h, putative
PF3D7_1223200	nucleus export protein BRR6, putative
PF3D7_1240400	erythrocyte membrane protein 1, PfEMP1
PF3D7_1339000	conserved Plasmodium protein, unknown function
PF3D7_1339100	tRNA Methionine
PF3D7_1350500	conserved Plasmodium protein, unknown function
PF3D7_1350600	conserved Plasmodium protein, unknown function
PF3D7_1373500	erythrocyte membrane protein 1, PfEMP1
PF3D7_1416600	conserved Plasmodium protein, unknown function
PF3D7_1418700	5S ribosomal RNA
PF3D7_1430100	serine/threonine protein phosphatase 2A activator
PF3D7_1466400	AP2 domain transcription factor AP2-EXP
PF3D7_1473700	nucleoporin NUP116/NSP116, putative
PF3D7_1473900	conserved Plasmodium protein, unknown function
