# Supplementary material for: A Plasmodium falciparum MORC protein complex modulates epigenetic control of gene expression through interaction with heterochromatin
Source: eLife. 2024 Oct 16;12:RP92201. doi: 10.7554/eLife.92201 (PMC11483127; doi:10.7554/eLife.92201)
Supplement: Supplementary file 5. — GO Terms were defined using PlasmoDB.org GO Term enrichment function (Biological Process with p-value cutoff of 0.05). [file elife-92201-supp5.xlsx]

## Sheet: MORC_Genes_30hpi_GO_Terms
#Supplementary File 5:
#Gene Ontology (GO) Terms for gene targets of PfMORC at 30hpi and 40hpi determined by ChIP-seq genome-wide occupancy
#GO Terms were defined using PlasmoDB.org GO Term enrichment function (Biological Process with p-value cutoff of 0.05)
ID	Name	Bgd count	Result count	Result gene list	Pct of bgd	Fold enrichment	Odds ratio	P-value	Benjamini	Bonferroni
GO:0009405	obsolete pathogenesis	75	21	PF3D7_0100100,PF3D7_0115700,PF3D7_0200100,PF3D7_0223500,PF3D7_0300100,PF3D7_0324900,PF3D7_0400100,PF3D7_0426000,PF3D7_0700100,PF3D7_0733000,PF3D7_0800100,PF3D7_0833500,PF3D7_0900100,PF3D7_0937800,PF3D7_1000100,PF3D7_1035700,PF3D7_1041300,PF3D7_1200100,PF3D7_1219300,PF3D7_1240400,PF3D7_1373500,	28	11.5	19.06	1.30452e-17	3.13085e-15	3.13085e-15
GO:0098609	cell-cell adhesion	62	15	PF3D7_0100100,PF3D7_0115700,PF3D7_0200100,PF3D7_0223500,PF3D7_0400100,PF3D7_0426000,PF3D7_0733000,PF3D7_0800100,PF3D7_0900100,PF3D7_0937800,PF3D7_1000100,PF3D7_1041300,PF3D7_1200100,PF3D7_1219300,PF3D7_1240400,	24.2	9.94	14.67	8.48943e-12	1.01873e-09	2.03746e-09
GO:0007155	cell adhesion	64	15	PF3D7_0100100,PF3D7_0115700,PF3D7_0200100,PF3D7_0223500,PF3D7_0400100,PF3D7_0426000,PF3D7_0733000,PF3D7_0800100,PF3D7_0900100,PF3D7_0937800,PF3D7_1000100,PF3D7_1041300,PF3D7_1200100,PF3D7_1219300,PF3D7_1240400,	23.4	9.63	14.07	1.39807e-11	1.11846e-09	3.35537e-09
GO:0044403	biological process involved in symbiotic interaction	404	27	PF3D7_0100100,PF3D7_0115700,PF3D7_0200100,PF3D7_0202000,PF3D7_0223500,PF3D7_0400100,PF3D7_0421200,PF3D7_0426000,PF3D7_0501600,PF3D7_0733000,PF3D7_0800100,PF3D7_0801000,PF3D7_0831700,PF3D7_0905400,PF3D7_0937800,PF3D7_1000100,PF3D7_1035700,PF3D7_1041300,PF3D7_1136900,PF3D7_1200100,PF3D7_1219300,PF3D7_1222700,PF3D7_1240400,PF3D7_1310700,PF3D7_1335100,PF3D7_1430200,PF3D7_1462800,	6.7	2.75	3.49	6.98568e-07	3.703e-05	0.000167656
GO:0044419	biological process involved in interspecies interaction between organisms	406	27	PF3D7_0100100,PF3D7_0115700,PF3D7_0200100,PF3D7_0202000,PF3D7_0223500,PF3D7_0400100,PF3D7_0421200,PF3D7_0426000,PF3D7_0501600,PF3D7_0733000,PF3D7_0800100,PF3D7_0801000,PF3D7_0831700,PF3D7_0905400,PF3D7_0937800,PF3D7_1000100,PF3D7_1035700,PF3D7_1041300,PF3D7_1136900,PF3D7_1200100,PF3D7_1219300,PF3D7_1222700,PF3D7_1240400,PF3D7_1310700,PF3D7_1335100,PF3D7_1430200,PF3D7_1462800,	6.7	2.73	3.47	7.71459e-07	3.703e-05	0.00018515
GO:0022610	biological adhesion	190	17	PF3D7_0100100,PF3D7_0115700,PF3D7_0200100,PF3D7_0202000,PF3D7_0223500,PF3D7_0400100,PF3D7_0426000,PF3D7_0733000,PF3D7_0800100,PF3D7_0831700,PF3D7_0900100,PF3D7_0937800,PF3D7_1000100,PF3D7_1041300,PF3D7_1200100,PF3D7_1219300,PF3D7_1240400,	8.9	3.67	4.48	2.41035e-06	9.64138e-05	0.000578483
GO:0051701	biological process involved in interaction with host	388	25	PF3D7_0100100,PF3D7_0115700,PF3D7_0200100,PF3D7_0223500,PF3D7_0400100,PF3D7_0421200,PF3D7_0426000,PF3D7_0501600,PF3D7_0733000,PF3D7_0800100,PF3D7_0801000,PF3D7_0905400,PF3D7_0937800,PF3D7_1000100,PF3D7_1035700,PF3D7_1041300,PF3D7_1136900,PF3D7_1200100,PF3D7_1219300,PF3D7_1222700,PF3D7_1240400,PF3D7_1310700,PF3D7_1335100,PF3D7_1430200,PF3D7_1462800,	6.4	2.65	3.28	3.92827e-06	0.000115117	0.000942784
GO:0020035	cytoadherence to microvasculature, mediated by symbiont protein	176	16	PF3D7_0100100,PF3D7_0115700,PF3D7_0200100,PF3D7_0202000,PF3D7_0223500,PF3D7_0400100,PF3D7_0426000,PF3D7_0733000,PF3D7_0800100,PF3D7_0831700,PF3D7_0937800,PF3D7_1000100,PF3D7_1041300,PF3D7_1200100,PF3D7_1219300,PF3D7_1240400,	9.1	3.73	4.52	4.0069e-06	0.000115117	0.000961656
GO:0044406	adhesion of symbiont to host	177	16	PF3D7_0100100,PF3D7_0115700,PF3D7_0200100,PF3D7_0202000,PF3D7_0223500,PF3D7_0400100,PF3D7_0426000,PF3D7_0733000,PF3D7_0800100,PF3D7_0831700,PF3D7_0937800,PF3D7_1000100,PF3D7_1041300,PF3D7_1200100,PF3D7_1219300,PF3D7_1240400,	9	3.71	4.5	4.3169e-06	0.000115117	0.00103606
GO:0020033	antigenic variation	202	15	PF3D7_0100100,PF3D7_0115700,PF3D7_0200100,PF3D7_0223500,PF3D7_0400100,PF3D7_0421200,PF3D7_0426000,PF3D7_0733000,PF3D7_0800100,PF3D7_0937800,PF3D7_1000100,PF3D7_1041300,PF3D7_1200100,PF3D7_1219300,PF3D7_1240400,	7.4	3.05	3.57	9.18248e-05	0.0018079	0.0220379
GO:0042783	evasion of host immune response	205	15	PF3D7_0100100,PF3D7_0115700,PF3D7_0200100,PF3D7_0223500,PF3D7_0400100,PF3D7_0421200,PF3D7_0426000,PF3D7_0733000,PF3D7_0800100,PF3D7_0937800,PF3D7_1000100,PF3D7_1041300,PF3D7_1200100,PF3D7_1219300,PF3D7_1240400,	7.3	3.01	3.51	0.000108627	0.0018079	0.0260705
GO:0052572	response to host immune response	208	15	PF3D7_0100100,PF3D7_0115700,PF3D7_0200100,PF3D7_0223500,PF3D7_0400100,PF3D7_0421200,PF3D7_0426000,PF3D7_0733000,PF3D7_0800100,PF3D7_0937800,PF3D7_1000100,PF3D7_1041300,PF3D7_1200100,PF3D7_1219300,PF3D7_1240400,	7.2	2.96	3.45	0.000128059	0.0018079	0.0307342
GO:0052200	response to host defenses	208	15	PF3D7_0100100,PF3D7_0115700,PF3D7_0200100,PF3D7_0223500,PF3D7_0400100,PF3D7_0421200,PF3D7_0426000,PF3D7_0733000,PF3D7_0800100,PF3D7_0937800,PF3D7_1000100,PF3D7_1041300,PF3D7_1200100,PF3D7_1219300,PF3D7_1240400,	7.2	2.96	3.45	0.000128059	0.0018079	0.0307342
GO:0052173	response to defenses of other organism	208	15	PF3D7_0100100,PF3D7_0115700,PF3D7_0200100,PF3D7_0223500,PF3D7_0400100,PF3D7_0421200,PF3D7_0426000,PF3D7_0733000,PF3D7_0800100,PF3D7_0937800,PF3D7_1000100,PF3D7_1041300,PF3D7_1200100,PF3D7_1219300,PF3D7_1240400,	7.2	2.96	3.45	0.000128059	0.0018079	0.0307342
GO:0051707	response to other organism	208	15	PF3D7_0100100,PF3D7_0115700,PF3D7_0200100,PF3D7_0223500,PF3D7_0400100,PF3D7_0421200,PF3D7_0426000,PF3D7_0733000,PF3D7_0800100,PF3D7_0937800,PF3D7_1000100,PF3D7_1041300,PF3D7_1200100,PF3D7_1219300,PF3D7_1240400,	7.2	2.96	3.45	0.000128059	0.0018079	0.0307342
GO:0075136	response to host	208	15	PF3D7_0100100,PF3D7_0115700,PF3D7_0200100,PF3D7_0223500,PF3D7_0400100,PF3D7_0421200,PF3D7_0426000,PF3D7_0733000,PF3D7_0800100,PF3D7_0937800,PF3D7_1000100,PF3D7_1041300,PF3D7_1200100,PF3D7_1219300,PF3D7_1240400,	7.2	2.96	3.45	0.000128059	0.0018079	0.0307342
GO:0043207	response to external biotic stimulus	208	15	PF3D7_0100100,PF3D7_0115700,PF3D7_0200100,PF3D7_0223500,PF3D7_0400100,PF3D7_0421200,PF3D7_0426000,PF3D7_0733000,PF3D7_0800100,PF3D7_0937800,PF3D7_1000100,PF3D7_1041300,PF3D7_1200100,PF3D7_1219300,PF3D7_1240400,	7.2	2.96	3.45	0.000128059	0.0018079	0.0307342
GO:0044409	entry into host	105	10	PF3D7_0501600,PF3D7_0801000,PF3D7_0905400,PF3D7_1035700,PF3D7_1136900,PF3D7_1222700,PF3D7_1310700,PF3D7_1335100,PF3D7_1430200,PF3D7_1462800,	9.5	3.91	4.54	0.000201322	0.0026843	0.0483174
GO:0008150	biological process	634	29	PF3D7_0100100,PF3D7_0115700,PF3D7_0200100,PF3D7_0202000,PF3D7_0223500,PF3D7_0400100,PF3D7_0421200,PF3D7_0426000,PF3D7_0501600,PF3D7_0726300,PF3D7_0733000,PF3D7_0800100,PF3D7_0801000,PF3D7_0831700,PF3D7_0900100,PF3D7_0905400,PF3D7_0937800,PF3D7_1000100,PF3D7_1035700,PF3D7_1041300,PF3D7_1136900,PF3D7_1200100,PF3D7_1219300,PF3D7_1222700,PF3D7_1240400,PF3D7_1310700,PF3D7_1335100,PF3D7_1430200,PF3D7_1…	4.6	1.88	2.25	0.000399859	0.00505085	0.0959662
GO:0020013	modulation by symbiont of host erythrocyte aggregation	191	13	PF3D7_0100100,PF3D7_0115700,PF3D7_0223500,PF3D7_0400100,PF3D7_0426000,PF3D7_0733000,PF3D7_0800100,PF3D7_0937800,PF3D7_1000100,PF3D7_1041300,PF3D7_1200100,PF3D7_1219300,PF3D7_1240400,	6.8	2.8	3.19	0.000652681	0.00783217	0.156643
GO:0044068	modulation by symbiont of host cellular process	193	13	PF3D7_0100100,PF3D7_0115700,PF3D7_0223500,PF3D7_0400100,PF3D7_0426000,PF3D7_0733000,PF3D7_0800100,PF3D7_0937800,PF3D7_1000100,PF3D7_1041300,PF3D7_1200100,PF3D7_1219300,PF3D7_1240400,	6.7	2.77	3.15	0.000720594	0.00823536	0.172943
GO:0052126	movement in host environment	124	10	PF3D7_0501600,PF3D7_0801000,PF3D7_0905400,PF3D7_1035700,PF3D7_1136900,PF3D7_1222700,PF3D7_1310700,PF3D7_1335100,PF3D7_1430200,PF3D7_1462800,	8.1	3.31	3.77	0.000773638	0.00843968	0.185673
GO:0044003	modulation by symbiont of host process	206	13	PF3D7_0100100,PF3D7_0115700,PF3D7_0223500,PF3D7_0400100,PF3D7_0426000,PF3D7_0733000,PF3D7_0800100,PF3D7_0937800,PF3D7_1000100,PF3D7_1041300,PF3D7_1200100,PF3D7_1219300,PF3D7_1240400,	6.3	2.59	2.93	0.00132413	0.013817	0.317791
GO:0071554	cell wall organization or biogenesis	1	1	PF3D7_0801800,	100	41.07	inf	0.0243467	0.142517	1
GO:0071466	cellular response to xenobiotic stimulus	1	1	PF3D7_1462800,	100	41.07	inf	0.0243467	0.142517	1
GO:0070589	cellular component macromolecule biosynthetic process	1	1	PF3D7_0801800,	100	41.07	inf	0.0243467	0.142517	1
GO:0002939	tRNA N1-guanine methylation	1	1	PF3D7_0914300,	100	41.07	inf	0.0243467	0.142517	1
GO:0006056	mannoprotein metabolic process	1	1	PF3D7_0801800,	100	41.07	inf	0.0243467	0.142517	1
GO:0006057	mannoprotein biosynthetic process	1	1	PF3D7_0801800,	100	41.07	inf	0.0243467	0.142517	1
GO:0045905	positive regulation of translational termination	1	1	PF3D7_1204300,	100	41.07	inf	0.0243467	0.142517	1
GO:0045901	positive regulation of translational elongation	1	1	PF3D7_1204300,	100	41.07	inf	0.0243467	0.142517	1
GO:0019511	peptidyl-proline hydroxylation	1	1	PF3D7_0829400,	100	41.07	inf	0.0243467	0.142517	1
GO:0010628	positive regulation of gene expression	1	1	PF3D7_1466400,	100	41.07	inf	0.0243467	0.142517	1
GO:0044038	cell wall macromolecule biosynthetic process	1	1	PF3D7_0801800,	100	41.07	inf	0.0243467	0.142517	1
GO:0044036	cell wall macromolecule metabolic process	1	1	PF3D7_0801800,	100	41.07	inf	0.0243467	0.142517	1
GO:0043243	positive regulation of protein-containing complex disassembly	1	1	PF3D7_1204300,	100	41.07	inf	0.0243467	0.142517	1
GO:0018126	protein hydroxylation	1	1	PF3D7_0829400,	100	41.07	inf	0.0243467	0.142517	1
GO:0042546	cell wall biogenesis	1	1	PF3D7_0801800,	100	41.07	inf	0.0243467	0.142517	1
GO:0031506	cell wall glycoprotein biosynthetic process	1	1	PF3D7_0801800,	100	41.07	inf	0.0243467	0.142517	1
GO:0018401	peptidyl-proline hydroxylation to 4-hydroxy-L-proline	1	1	PF3D7_0829400,	100	41.07	inf	0.0243467	0.142517	1
GO:0000032	cell wall mannoprotein biosynthetic process	1	1	PF3D7_0801800,	100	41.07	inf	0.0243467	0.142517	1
GO:0006449	regulation of translational termination	2	1	PF3D7_1204300,	50	20.54	40.44	0.0481059	0.255623	1
GO:0015909	long-chain fatty acid transport	2	1	PF3D7_0215300,	50	20.54	40.44	0.0481059	0.255623	1
GO:0006006	glucose metabolic process	2	1	PF3D7_1462800,	50	20.54	40.44	0.0481059	0.255623	1
GO:0006509	membrane protein ectodomain proteolysis	2	1	PF3D7_1136900,	50	20.54	40.44	0.0481059	0.255623	1

## Sheet: MORC_Genes_40hpi_GO_Terms
#Supplementary File 5:
#Gene Ontology (GO) Terms for gene targets of PfMORC at 30hpi and 40hpi determined by ChIP-seq genome-wide occupancy
#GO Terms were defined using PlasmoDB.org GO Term enrichment function (Biological Process with p-value cutoff of 0.05)
ID	Name	Bgd count	Result count	Result gene list	Pct of bgd	Fold enrichment	Odds ratio	P-value	Benjamini	Bonferroni
GO:0009405	obsolete pathogenesis	75	22	PF3D7_0100100,PF3D7_0115700,PF3D7_0200100,PF3D7_0223500,PF3D7_0300100,PF3D7_0324900,PF3D7_0400100,PF3D7_0426000,PF3D7_0700100,PF3D7_0712300,PF3D7_0733000,PF3D7_0800100,PF3D7_0833500,PF3D7_0900100,PF3D7_0930300,PF3D7_0937800,PF3D7_1000100,PF3D7_1041300,PF3D7_1200100,PF3D7_1219300,PF3D7_1240400,PF3D7_1373500,	29.3	15.45	28.59	1.78314e-21	3.10266e-19	3.10266e-19
GO:0098609	cell-cell adhesion	62	16	PF3D7_0100100,PF3D7_0115700,PF3D7_0200100,PF3D7_0223500,PF3D7_0400100,PF3D7_0426000,PF3D7_0712300,PF3D7_0733000,PF3D7_0800100,PF3D7_0900100,PF3D7_0937800,PF3D7_1000100,PF3D7_1041300,PF3D7_1200100,PF3D7_1219300,PF3D7_1240400,	25.8	13.59	21.91	9.0166e-15	7.84444e-13	1.56889e-12
GO:0007155	cell adhesion	64	16	PF3D7_0100100,PF3D7_0115700,PF3D7_0200100,PF3D7_0223500,PF3D7_0400100,PF3D7_0426000,PF3D7_0712300,PF3D7_0733000,PF3D7_0800100,PF3D7_0900100,PF3D7_0937800,PF3D7_1000100,PF3D7_1041300,PF3D7_1200100,PF3D7_1219300,PF3D7_1240400,	25	13.17	20.99	1.56456e-14	9.07444e-13	2.72233e-12
GO:0022610	biological adhesion	190	16	PF3D7_0100100,PF3D7_0115700,PF3D7_0200100,PF3D7_0223500,PF3D7_0400100,PF3D7_0426000,PF3D7_0712300,PF3D7_0733000,PF3D7_0800100,PF3D7_0900100,PF3D7_0937800,PF3D7_1000100,PF3D7_1041300,PF3D7_1200100,PF3D7_1219300,PF3D7_1240400,	8.4	4.44	5.62	3.51917e-07	1.23784e-05	6.12335e-05
GO:0051701	biological process involved in interaction with host	388	23	PF3D7_0100100,PF3D7_0115700,PF3D7_0200100,PF3D7_0223500,PF3D7_0400100,PF3D7_0421200,PF3D7_0426000,PF3D7_0501600,PF3D7_0712300,PF3D7_0733000,PF3D7_0800100,PF3D7_0905400,PF3D7_0930300,PF3D7_0937800,PF3D7_1000100,PF3D7_1041300,PF3D7_1136900,PF3D7_1200100,PF3D7_1219300,PF3D7_1222700,PF3D7_1240400,PF3D7_1335100,PF3D7_1430200,	5.9	3.12	4.09	4.36852e-07	1.23784e-05	7.60122e-05
GO:0020035	cytoadherence to microvasculature, mediated by symbiont protein	176	15	PF3D7_0100100,PF3D7_0115700,PF3D7_0200100,PF3D7_0223500,PF3D7_0400100,PF3D7_0426000,PF3D7_0712300,PF3D7_0733000,PF3D7_0800100,PF3D7_0937800,PF3D7_1000100,PF3D7_1041300,PF3D7_1200100,PF3D7_1219300,PF3D7_1240400,	8.5	4.49	5.63	7.38141e-07	1.23784e-05	0.000128436
GO:0044406	adhesion of symbiont to host	177	15	PF3D7_0100100,PF3D7_0115700,PF3D7_0200100,PF3D7_0223500,PF3D7_0400100,PF3D7_0426000,PF3D7_0712300,PF3D7_0733000,PF3D7_0800100,PF3D7_0937800,PF3D7_1000100,PF3D7_1041300,PF3D7_1200100,PF3D7_1219300,PF3D7_1240400,	8.5	4.46	5.6	7.9435e-07	1.23784e-05	0.000138217
GO:0020033	antigenic variation	202	16	PF3D7_0100100,PF3D7_0115700,PF3D7_0200100,PF3D7_0223500,PF3D7_0400100,PF3D7_0421200,PF3D7_0426000,PF3D7_0712300,PF3D7_0733000,PF3D7_0800100,PF3D7_0937800,PF3D7_1000100,PF3D7_1041300,PF3D7_1200100,PF3D7_1219300,PF3D7_1240400,	7.9	4.17	5.24	8.14067e-07	1.23784e-05	0.000141648
GO:0044403	biological process involved in symbiotic interaction	404	23	PF3D7_0100100,PF3D7_0115700,PF3D7_0200100,PF3D7_0223500,PF3D7_0400100,PF3D7_0421200,PF3D7_0426000,PF3D7_0501600,PF3D7_0712300,PF3D7_0733000,PF3D7_0800100,PF3D7_0905400,PF3D7_0930300,PF3D7_0937800,PF3D7_1000100,PF3D7_1041300,PF3D7_1136900,PF3D7_1200100,PF3D7_1219300,PF3D7_1222700,PF3D7_1240400,PF3D7_1335100,PF3D7_1430200,	5.7	3	3.91	9.02432e-07	1.23784e-05	0.000157023
GO:0044419	biological process involved in interspecies interaction between organisms	406	23	PF3D7_0100100,PF3D7_0115700,PF3D7_0200100,PF3D7_0223500,PF3D7_0400100,PF3D7_0421200,PF3D7_0426000,PF3D7_0501600,PF3D7_0712300,PF3D7_0733000,PF3D7_0800100,PF3D7_0905400,PF3D7_0930300,PF3D7_0937800,PF3D7_1000100,PF3D7_1041300,PF3D7_1136900,PF3D7_1200100,PF3D7_1219300,PF3D7_1222700,PF3D7_1240400,PF3D7_1335100,PF3D7_1430200,	5.7	2.98	3.88	9.85337e-07	1.23784e-05	0.000171449
GO:0042783	evasion of host immune response	205	16	PF3D7_0100100,PF3D7_0115700,PF3D7_0200100,PF3D7_0223500,PF3D7_0400100,PF3D7_0421200,PF3D7_0426000,PF3D7_0712300,PF3D7_0733000,PF3D7_0800100,PF3D7_0937800,PF3D7_1000100,PF3D7_1041300,PF3D7_1200100,PF3D7_1219300,PF3D7_1240400,	7.8	4.11	5.16	9.94077e-07	1.23784e-05	0.000172969
GO:0043207	response to external biotic stimulus	208	16	PF3D7_0100100,PF3D7_0115700,PF3D7_0200100,PF3D7_0223500,PF3D7_0400100,PF3D7_0421200,PF3D7_0426000,PF3D7_0712300,PF3D7_0733000,PF3D7_0800100,PF3D7_0937800,PF3D7_1000100,PF3D7_1041300,PF3D7_1200100,PF3D7_1219300,PF3D7_1240400,	7.7	4.05	5.07	1.20939e-06	1.23784e-05	0.000210433
GO:0051707	response to other organism	208	16	PF3D7_0100100,PF3D7_0115700,PF3D7_0200100,PF3D7_0223500,PF3D7_0400100,PF3D7_0421200,PF3D7_0426000,PF3D7_0712300,PF3D7_0733000,PF3D7_0800100,PF3D7_0937800,PF3D7_1000100,PF3D7_1041300,PF3D7_1200100,PF3D7_1219300,PF3D7_1240400,	7.7	4.05	5.07	1.20939e-06	1.23784e-05	0.000210433
GO:0052173	response to defenses of other organism	208	16	PF3D7_0100100,PF3D7_0115700,PF3D7_0200100,PF3D7_0223500,PF3D7_0400100,PF3D7_0421200,PF3D7_0426000,PF3D7_0712300,PF3D7_0733000,PF3D7_0800100,PF3D7_0937800,PF3D7_1000100,PF3D7_1041300,PF3D7_1200100,PF3D7_1219300,PF3D7_1240400,	7.7	4.05	5.07	1.20939e-06	1.23784e-05	0.000210433
GO:0052200	response to host defenses	208	16	PF3D7_0100100,PF3D7_0115700,PF3D7_0200100,PF3D7_0223500,PF3D7_0400100,PF3D7_0421200,PF3D7_0426000,PF3D7_0712300,PF3D7_0733000,PF3D7_0800100,PF3D7_0937800,PF3D7_1000100,PF3D7_1041300,PF3D7_1200100,PF3D7_1219300,PF3D7_1240400,	7.7	4.05	5.07	1.20939e-06	1.23784e-05	0.000210433
GO:0052572	response to host immune response	208	16	PF3D7_0100100,PF3D7_0115700,PF3D7_0200100,PF3D7_0223500,PF3D7_0400100,PF3D7_0421200,PF3D7_0426000,PF3D7_0712300,PF3D7_0733000,PF3D7_0800100,PF3D7_0937800,PF3D7_1000100,PF3D7_1041300,PF3D7_1200100,PF3D7_1219300,PF3D7_1240400,	7.7	4.05	5.07	1.20939e-06	1.23784e-05	0.000210433
GO:0075136	response to host	208	16	PF3D7_0100100,PF3D7_0115700,PF3D7_0200100,PF3D7_0223500,PF3D7_0400100,PF3D7_0421200,PF3D7_0426000,PF3D7_0712300,PF3D7_0733000,PF3D7_0800100,PF3D7_0937800,PF3D7_1000100,PF3D7_1041300,PF3D7_1200100,PF3D7_1219300,PF3D7_1240400,	7.7	4.05	5.07	1.20939e-06	1.23784e-05	0.000210433
GO:0020013	modulation by symbiont of host erythrocyte aggregation	191	14	PF3D7_0100100,PF3D7_0115700,PF3D7_0223500,PF3D7_0400100,PF3D7_0426000,PF3D7_0712300,PF3D7_0733000,PF3D7_0800100,PF3D7_0937800,PF3D7_1000100,PF3D7_1041300,PF3D7_1200100,PF3D7_1219300,PF3D7_1240400,	7.3	3.86	4.7	1.0803e-05	0.000104429	0.00187973
GO:0044068	modulation by symbiont of host cellular process	193	14	PF3D7_0100100,PF3D7_0115700,PF3D7_0223500,PF3D7_0400100,PF3D7_0426000,PF3D7_0712300,PF3D7_0733000,PF3D7_0800100,PF3D7_0937800,PF3D7_1000100,PF3D7_1041300,PF3D7_1200100,PF3D7_1219300,PF3D7_1240400,	7.3	3.82	4.64	1.21853e-05	0.000111591	0.00212024
GO:0044003	modulation by symbiont of host process	206	14	PF3D7_0100100,PF3D7_0115700,PF3D7_0223500,PF3D7_0400100,PF3D7_0426000,PF3D7_0712300,PF3D7_0733000,PF3D7_0800100,PF3D7_0937800,PF3D7_1000100,PF3D7_1041300,PF3D7_1200100,PF3D7_1219300,PF3D7_1240400,	6.8	3.58	4.31	2.56574e-05	0.000223219	0.00446438
GO:0008150	biological process	634	26	PF3D7_0100100,PF3D7_0115700,PF3D7_0200100,PF3D7_0223500,PF3D7_0400100,PF3D7_0421200,PF3D7_0426000,PF3D7_0501600,PF3D7_0508800,PF3D7_0712300,PF3D7_0726300,PF3D7_0733000,PF3D7_0800100,PF3D7_0900100,PF3D7_0905400,PF3D7_0930300,PF3D7_0937800,PF3D7_1000100,PF3D7_1041300,PF3D7_1136900,PF3D7_1200100,PF3D7_1219300,PF3D7_1222700,PF3D7_1240400,PF3D7_1335100,PF3D7_1430200,	4.1	2.16	2.74	6.73423e-05	0.000557979	0.0117176
GO:0044409	entry into host	105	7	PF3D7_0501600,PF3D7_0905400,PF3D7_0930300,PF3D7_1136900,PF3D7_1222700,PF3D7_1335100,PF3D7_1430200,	6.7	3.51	3.93	0.00351339	0.0277878	0.611331
GO:0052126	movement in host environment	124	7	PF3D7_0501600,PF3D7_0905400,PF3D7_0930300,PF3D7_1136900,PF3D7_1222700,PF3D7_1335100,PF3D7_1430200,	5.6	2.97	3.28	0.00870136	0.0658276	1
GO:0043243	positive regulation of protein-containing complex disassembly	1	1	PF3D7_1204300,	100	52.67	inf	0.0189859	0.100108	1
GO:0072388	flavin adenine dinucleotide biosynthetic process	1	1	PF3D7_1015000,	100	52.67	inf	0.0189859	0.100108	1
GO:0072387	flavin adenine dinucleotide metabolic process	1	1	PF3D7_1015000,	100	52.67	inf	0.0189859	0.100108	1
GO:0006747	FAD biosynthetic process	1	1	PF3D7_1015000,	100	52.67	inf	0.0189859	0.100108	1
GO:0051096	positive regulation of helicase activity	1	1	PF3D7_0508800,	100	52.67	inf	0.0189859	0.100108	1
GO:0046443	FAD metabolic process	1	1	PF3D7_1015000,	100	52.67	inf	0.0189859	0.100108	1
GO:0045905	positive regulation of translational termination	1	1	PF3D7_1204300,	100	52.67	inf	0.0189859	0.100108	1
GO:0045901	positive regulation of translational elongation	1	1	PF3D7_1204300,	100	52.67	inf	0.0189859	0.100108	1
GO:0010628	positive regulation of gene expression	1	1	PF3D7_1466400,	100	52.67	inf	0.0189859	0.100108	1
GO:0002939	tRNA N1-guanine methylation	1	1	PF3D7_0914300,	100	52.67	inf	0.0189859	0.100108	1
GO:0006509	membrane protein ectodomain proteolysis	2	1	PF3D7_1136900,	50	26.34	52.27	0.0376156	0.167823	1
GO:0006449	regulation of translational termination	2	1	PF3D7_1204300,	50	26.34	52.27	0.0376156	0.167823	1
GO:0006264	mitochondrial DNA replication	2	1	PF3D7_0508800,	50	26.34	52.27	0.0376156	0.167823	1
GO:0042726	flavin-containing compound metabolic process	2	1	PF3D7_1015000,	50	26.34	52.27	0.0376156	0.167823	1
GO:0042727	flavin-containing compound biosynthetic process	2	1	PF3D7_1015000,	50	26.34	52.27	0.0376156	0.167823	1
GO:0051095	regulation of helicase activity	2	1	PF3D7_0508800,	50	26.34	52.27	0.0376156	0.167823	1
