# Supplementary material for: A Plasmodium falciparum MORC protein complex modulates epigenetic control of gene expression through interaction with heterochromatin
Source: eLife. 2024 Oct 16;12:RP92201. doi: 10.7554/eLife.92201 (PMC11483127; doi:10.7554/eLife.92201)
Supplement: Supplementary file 6. [file elife-92201-supp6.xlsx]

## Sheet: PfMORC-KD vs PfMORC-WT
#Supplementary File 6
# Full list of differentially expressed genes in PfMORC-KD vs PfMORC-WT
gene_id	baseMean	log2FoldChange	lfcSE	stat	pvalue	padj	gene_product	SO
PF3D7_API05700	11.0143	6.90047	2.8362	4.58375	0.101077	NA	small subunit ribosomal RNA	ncRNA_gene
PF3D7_0732100	3.58039	5.27571	2.29786	4.94074	0.0845536	NA	erythrocyte membrane protein 1 (PfEMP1), pseudogene	pseudogene
PF3D7_0101000	2.2529	4.54785	2.82322	2.7703	0.250286	NA	rifin	protein_coding_gene
PF3D7_0411700	2.55073	4.43284	2.61519	3.68605	0.158338	NA	conserved Plasmodium protein, unknown function	protein_coding_gene
PF3D7_API02600	5.57634	4.36178	1.83553	8.81951	0.0121582	NA	apicoplast ribosomal protein S11	protein_coding_gene
PF3D7_1356500	2.78112	3.82607	2.3311	2.66739	0.263502	NA	conserved Plasmodium protein, unknown function	protein_coding_gene
PF3D7_1473000	2.72211	3.80305	2.29014	3.20007	0.201889	NA	conserved Plasmodium protein, unknown function	protein_coding_gene
PF3D7_1444000	2.53766	3.26062	2.46915	1.44745	0.484943	NA	conserved Plasmodium protein, unknown function	protein_coding_gene
PF3D7_0324700	9.74083	3.15426	1.61791	3.66829	0.15975	NA	erythrocyte membrane protein 1 (PfEMP1), exon 2, pseudogene	pseudogene
PF3D7_1372700	2.27815	3.15158	2.42126	1.51944	0.467798	NA	rifin	protein_coding_gene
PF3D7_0221900	0.79588	3.08507	3.96419	0.864976	0.648893	NA	erythrocyte membrane protein 1 (PfEMP1), pseudogene	pseudogene
PF3D7_0600900	2.87429	3.00188	2.04135	2.07871	0.353683	NA	rifin, pseudogene	pseudogene
PF3D7_1240800	0.910383	2.88301	3.97351	1.07036	0.585565	NA	Plasmodium RNA of unknown function RUF6	ncRNA_gene
PF3D7_0512450	4.58966	2.81857	1.78019	2.59531	0.273172	NA	conserved Plasmodium protein, unknown function, pseudogene	pseudogene
PF3D7_API02000	0.647563	2.8061	3.9757	0.744742	0.689099	NA	apicoplast ribosomal protein L14	protein_coding_gene
PF3D7_0800750	0.633632	2.73794	3.98027	0.748952	0.687649	NA	Plasmodium exported protein, unknown function, pseudogene	pseudogene
PF3D7_0101800	0.633478	2.73754	3.98029	0.748864	0.68768	NA	stevor	protein_coding_gene
PF3D7_0115200	0.762857	2.69574	3.99087	0.962573	0.617988	NA	rifin	protein_coding_gene
PF3D7_0832800	0.729297	2.69432	3.98296	0.91016	0.634397	NA	rifin	protein_coding_gene
PF3D7_0420800	1.15272	2.53044	3.99399	1.46994	0.47952	NA	Plasmodium RNA of unknown function RUF6	ncRNA_gene
PF3D7_1101900	0.487271	2.40472	3.99642	0.594463	0.742872	NA	erythrocyte membrane protein 1 (PfEMP1), pseudogene	pseudogene
PF3D7_0700900	0.487271	2.40472	3.99642	0.594463	0.742872	NA	exported protein family 1, pseudogene	pseudogene
PF3D7_1000700	0.487271	2.40472	3.99642	0.594463	0.742872	NA	Plasmodium exported protein (PHISTa), unknown function, pseudogene	pseudogene
PF3D7_0712100	0.487271	2.40472	3.99642	0.594463	0.742872	NA	Plasmodium RNA of unknown function RUF6	ncRNA_gene
PF3D7_1103300	0.953519	2.31	3.86815	0.470297	0.790454	NA	tRNA Leucine	ncRNA_gene
PF3D7_0200300	1.34189	2.28463	3.33302	1.43217	0.488663	NA	erythrocyte membrane protein 1 (PfEMP1), exon 2	protein_coding_gene
PF3D7_0413200	4.26399	2.20202	2.02217	1.58381	0.452982	NA	rifin	protein_coding_gene
PF3D7_0201000	1.35565	2.18029	3.98181	1.74532	0.417838	NA	rifin	protein_coding_gene
PF3D7_1370900	2189	2.13695	0.91627	7.07736	0.0290516	0.0674277	non-coding RNA	ncRNA_gene
PF3D7_0732900	5.66351	2.12163	1.66301	1.66471	0.435023	NA	rifin	protein_coding_gene
PF3D7_0604400	2.20552	2.10917	2.48035	0.697351	0.705622	NA	conserved protein, unknown function	protein_coding_gene
PF3D7_1463100	1.16198	2.09771	3.9901	1.63315	0.441943	NA	conserved Plasmodium protein, unknown function, pseudogene	pseudogene
PF3D7_0617700	0.550718	2.03795	4.02223	0.881895	0.643426	NA	rifin	protein_coding_gene
PF3D7_1372800	0.773372	1.99071	3.96274	0.442179	0.801645	NA	stevor	protein_coding_gene
PF3D7_1240500	3.72795	1.9685	2.0889	5.00351	0.081941	NA	Plasmodium RNA of unknown function RUF6	ncRNA_gene
PF3D7_API02800	1.19081	1.90492	3.52115	0.856588	0.65162	NA	apicoplast ribosomal protein S7	protein_coding_gene
PF3D7_MIT04200	0.893681	1.90383	3.96604	0.179991	0.913936	NA	ribosomal RNA fragment RNA8	ncRNA_gene
PF3D7_0632300	0.774656	1.87704	4.01559	1.34053	0.511574	NA	rifin	protein_coding_gene
PF3D7_API01900	0.324847	1.8211	4.04037	0.391018	0.822416	NA	apicoplast ribosomal protein S17	protein_coding_gene
PF3D7_0900350	0.324847	1.8211	4.04037	0.391018	0.822416	NA	Plasmodium exported protein, unknown function, fragment, pseudogene	pseudogene
PF3D7_1410400	8436.51	1.75364	0.793285	4.09564	0.129016	0.208259	rhoptry-associated protein 1	protein_coding_gene
PF3D7_1136200	613.767	1.74477	0.548054	8.55455	0.0138804	0.0387458	conserved Plasmodium protein, unknown function	protein_coding_gene
PF3D7_0712700	0.308132	1.7264	4.04451	0.361169	0.834782	NA	Plasmodium RNA of unknown function RUF6	ncRNA_gene
PF3D7_1370800	1782.23	1.71327	0.499402	22.7266	1.16139e-05	0.000138302	non-coding RNA	ncRNA_gene
PF3D7_0425050	0.308455	1.70328	4.04354	0.421876	0.809824	NA	Plasmodium exported protein, unknown function, pseudogene	pseudogene
PF3D7_1371200	0.580992	1.68344	4.03325	1.13299	0.567512	NA	5.8S ribosomal RNA	ncRNA_gene
PF3D7_0425000	0.438053	1.68335	4.03325	0.850772	0.653518	NA	Plasmodium exported protein, unknown function, pseudogene	pseudogene
PF3D7_API03800	20.6836	1.6781	0.814043	4.55361	0.102612	0.17479	probable protein, unknown function	protein_coding_gene
PF3D7_1452000	2348.26	1.67265	0.439345	12.7213	0.00172821	0.00778111	rhoptry neck protein 2	protein_coding_gene
PF3D7_1252100	3201.69	1.67158	0.338205	22.1202	1.57275e-05	0.000174855	rhoptry neck protein 3	protein_coding_gene
PF3D7_0829900	7281.95	1.64759	0.421583	13.3531	0.00126012	0.00610311	non-coding RNA	ncRNA_gene
PF3D7_0701100	10.1044	1.6092	1.32128	2.96302	0.227294	NA	rifin	protein_coding_gene
PF3D7_0507200	840.133	1.60205	0.281718	47.6705	4.45131e-11	9.24448e-09	subtilisin-like protease 3	protein_coding_gene
PF3D7_1007300	175.145	1.58732	0.368237	25.0386	3.65536e-06	5.73373e-05	RING zinc finger protein, putative	protein_coding_gene
PF3D7_1401000	15.9914	1.56898	1.12972	1.87491	0.391624	0.487138	GBPH protein	protein_coding_gene
PF3D7_0408800	10.9415	1.55305	1.06059	2.03238	0.361972	NA	conserved Plasmodium protein, unknown function	protein_coding_gene
PF3D7_1370500	1465.32	1.5516	0.51245	18.8254	8.16795e-05	0.000671013	non-coding RNA	ncRNA_gene
PF3D7_0707300	11795.6	1.53528	0.782453	3.49861	0.173895	0.262919	rhoptry-associated membrane antigen	protein_coding_gene
PF3D7_API02900	1206.98	1.5174	0.239625	41.0473	1.22093e-09	1.18977e-07	elongation factor Tu	protein_coding_gene
PF3D7_API01800	24.5778	1.51341	0.726563	4.48323	0.106287	0.179753	apicoplast ribosomal protein L16	protein_coding_gene
PF3D7_1426500	146.279	1.50074	0.440737	12.9627	0.00153172	0.00709734	ABC transporter G family member 2	protein_coding_gene
PF3D7_0722200	2771.6	1.50021	0.814728	3.89774	0.142435	0.224438	rhoptry-associated leucine zipper-like protein 1	protein_coding_gene
PF3D7_0917300	162.618	1.48945	0.523739	7.34227	0.0254476	0.0608562	conserved protein, unknown function	protein_coding_gene
PF3D7_0621350	1.75401	1.48813	2.69754	0.869073	0.647565	NA	protein SYS1, putative	protein_coding_gene
PF3D7_1331400	270.723	1.48785	0.583214	12.9619	0.00153238	0.00709734	CPW-WPC family protein	protein_coding_gene
PF3D7_0800500	1.5651	1.48766	3.41205	0.062974	0.969004	NA	rifin	protein_coding_gene
PF3D7_1371000	613.956	1.4816	0.361393	37.8773	5.95723e-09	4.32294e-07	18S ribosomal RNA	ncRNA_gene
PF3D7_0302500	27964	1.43114	0.76604	3.25284	0.196633	0.288476	cytoadherence linked asexual protein 3.1	protein_coding_gene
PF3D7_1103900	1.24839	1.43059	3.39908	1.33961	0.511809	NA	RIIa domain-containing protein, putative	protein_coding_gene
PF3D7_1035200	13385.5	1.42923	0.372079	20.4125	3.69382e-05	0.000352542	S-antigen	protein_coding_gene
PF3D7_0401300	4.39173	1.4217	2.15198	1.21044	0.545954	NA	rifin	protein_coding_gene
PF3D7_1400200	2.22617	1.41918	3.05076	0.172631	0.917305	NA	rifin	protein_coding_gene
PF3D7_1012200	1151.43	1.41698	0.495472	7.6821	0.021471	0.0536466	rhoptry associated adhesin	protein_coding_gene
PF3D7_0930300	58034.2	1.40911	0.200411	48.617	2.77301e-11	6.85595e-09	merozoite surface protein 1	protein_coding_gene
PF3D7_0732800	3.74014	1.40885	3.03982	1.62735	0.443226	NA	erythrocyte membrane protein 1 (PfEMP1), exon 2	protein_coding_gene
PF3D7_1148200	763.272	1.40759	0.480295	10.1836	0.00614699	0.0205639	non-coding RNA	ncRNA_gene
PF3D7_0937300	0.699498	1.4062	3.99855	0.0944452	0.953875	NA	rifin	protein_coding_gene
PF3D7_1431400	1270.12	1.40476	0.338771	20.8438	2.97729e-05	0.000296132	surface-related antigen SRA	protein_coding_gene
PF3D7_0829800	4645.74	1.40271	0.460595	8.24382	0.0162135	0.0434367	non-coding RNA	ncRNA_gene
PF3D7_0207600	143598	1.39507	0.250284	53.1885	2.82011e-12	1.33109e-09	serine repeat antigen 5	protein_coding_gene
PF3D7_0604100	4470.81	1.38939	0.232381	35.7213	1.75076e-08	1.01e-06	AP2 domain transcription factor	protein_coding_gene
PF3D7_0301100	1.66929	1.38609	3.06618	2.34178	0.310091	NA	Plasmodium exported protein (hyp13), unknown function	protein_coding_gene
PF3D7_0905400	28605.5	1.38258	0.317217	18.5762	9.25202e-05	0.000738086	high molecular weight rhoptry protein 3	protein_coding_gene
PF3D7_0506400	3.54984	1.36542	2.36659	3.30034	0.192017	NA	conserved Plasmodium protein, unknown function	protein_coding_gene
PF3D7_0809000	5.23504	1.36005	1.57104	1.83315	0.399887	NA	Plasmodium RNA of unknown function RUF6	ncRNA_gene
PF3D7_0101400	0.387328	1.3576	4.05254	0.840325	0.65694	NA	exported protein family 1, pseudogene	pseudogene
PF3D7_0200900	0.387328	1.3576	4.05254	0.840325	0.65694	NA	stevor, pseudogene	pseudogene
PF3D7_0701800	0.292035	1.35754	4.05254	0.579729	0.748365	NA	rifin	protein_coding_gene
PF3D7_1129850	0.292035	1.35754	4.05254	0.579729	0.748365	NA	UNC-50 protein, putative, pseudogene	pseudogene
PF3D7_0404700	1056.91	1.34832	0.419963	11.5278	0.00313884	0.0123088	dipeptidyl aminopeptidase 3	protein_coding_gene
PF3D7_1228600	26275.9	1.32779	0.322607	15.897	0.000353191	0.00218046	merozoite surface protein 9	protein_coding_gene
PF3D7_1337700	236.593	1.32194	0.455073	8.87166	0.0118452	0.0345119	phosphoinositide-binding protein PH2	protein_coding_gene
PF3D7_1145200	2924.85	1.31469	0.324777	25.0227	3.6846e-06	5.74488e-05	serine/threonine protein kinase, putative	protein_coding_gene
PF3D7_0704500	3036.91	1.30635	0.240937	28.67	5.94827e-07	1.40379e-05	serine/threonine protein kinase, putative	protein_coding_gene
PF3D7_1371600	240.229	1.29834	0.344203	18.468	9.76621e-05	0.000770611	erythrocyte binding like protein 1, pseudogene	pseudogene
PF3D7_API02700	933.8	1.28217	0.241179	27.3785	1.13458e-06	2.2722e-05	apicoplast ribosomal protein S12	protein_coding_gene
PF3D7_0526600	6505.96	1.27166	0.343647	15.1441	0.000514636	0.00298881	conserved Plasmodium protein, unknown function	protein_coding_gene
PF3D7_0207300	34.5027	1.26767	0.683884	5.40495	0.0670393	0.126893	serine repeat antigen 8	protein_coding_gene
PF3D7_0531800	4114.71	1.26475	1.06458	1.62242	0.444321	0.537492	5.8S ribosomal RNA	ncRNA_gene
PF3D7_1029900	14240.9	1.26417	0.170814	68.745	1.18092e-15	1.22627e-12	ORC3 domain-containing protein, putative	protein_coding_gene
PF3D7_API05900	62.7359	1.25946	0.543867	11.6063	0.00301798	0.0119532	small subunit ribosomal RNA	ncRNA_gene
PF3D7_1235200	1203.81	1.24717	0.363666	12.0489	0.00241882	0.010136	V-type K+-independent H+-translocating inorganic pyrophosphatase	protein_coding_gene
PF3D7_0304100	268.323	1.23341	0.601215	5.85773	0.0534578	0.106874	inner membrane complex protein 1e, putative	protein_coding_gene
PF3D7_0528300	155.881	1.21885	0.452781	7.26309	0.0264752	0.0626809	conserved protein, unknown function	protein_coding_gene
PF3D7_0508100	5892.73	1.20951	0.217388	31.8756	1.1976e-07	4.37883e-06	SET domain protein, putative	protein_coding_gene
PF3D7_1232500	3072.17	1.20899	0.193406	38.1143	5.29156e-09	3.98171e-07	CG2-related protein, putative	protein_coding_gene
PF3D7_0831600	4257.37	1.20821	0.37432	19.4631	5.93804e-05	0.000515936	cytoadherence linked asexual protein 8	protein_coding_gene
PF3D7_1035700	3824.86	1.19113	0.293079	15.6597	0.000397695	0.00241783	duffy binding-like merozoite surface protein	protein_coding_gene
PF3D7_0104100	940.932	1.18918	0.265531	30.8016	2.04884e-07	6.23463e-06	protein E140, putative	protein_coding_gene
PF3D7_1214100	6246.77	1.18638	0.260588	23.3621	8.45266e-06	0.000106779	GPI ethanolamine phosphate transferase 3, putative	protein_coding_gene
PF3D7_1372400	166.52	1.17463	0.400174	8.31697	0.0156312	0.0422695	acyl-CoA synthetase	protein_coding_gene
PF3D7_0800400	6.65566	1.17284	1.69004	1.08425	0.581512	NA	rifin	protein_coding_gene
PF3D7_0828600	294.961	1.16537	0.407653	7.70133	0.0212656	0.0532101	folate transporter 1	protein_coding_gene
PF3D7_1229300	2641.51	1.15625	0.18875	37.8647	5.99483e-09	4.32294e-07	PhIL1-interacting candidate PIC1	protein_coding_gene
PF3D7_0929400	38254.2	1.15579	0.355995	18.8643	8.01053e-05	0.000661219	high molecular weight rhoptry protein 2	protein_coding_gene
PF3D7_0419400	855.815	1.15401	0.26628	22.8296	1.10311e-05	0.000133816	conserved Plasmodium protein, unknown function	protein_coding_gene
PF3D7_1475800	43.8718	1.15317	0.558355	4.92154	0.0853693	0.151794	conserved Plasmodium protein, unknown function	protein_coding_gene
PF3D7_0522600	1115.15	1.13832	0.279817	31.1463	1.72455e-07	5.45966e-06	magnesium transporter NIPA, putative	protein_coding_gene
PF3D7_1108100	235.613	1.13242	0.306682	31.1498	1.72152e-07	5.45966e-06	conserved Plasmodium protein, unknown function	protein_coding_gene
PF3D7_0207400	21188.9	1.11772	0.208235	47.8401	4.08934e-11	8.84662e-09	serine repeat antigen 7	protein_coding_gene
PF3D7_0407800	2880.39	1.10841	0.224386	44.7365	1.93014e-10	2.78368e-08	protein CINCH	protein_coding_gene
PF3D7_1141800	1514.4	1.10491	0.371816	24.1982	5.56451e-06	7.70425e-05	EELM2 domain-containing protein, putative	protein_coding_gene
PF3D7_1206000	1080.5	1.0947	0.384089	7.79296	0.0203133	0.0514471	shewanella-like protein phosphatase 2	protein_coding_gene
PF3D7_0510700	3.86366	1.08979	1.54608	1.05813	0.589154	NA	conserved Plasmodium protein, unknown function	protein_coding_gene
PF3D7_1029700	45.6778	1.08802	0.542803	3.91031	0.141543	0.223574	conserved Plasmodium protein, unknown function	protein_coding_gene
PF3D7_0101700	6.5891	1.07734	2.36413	0.503398	0.777479	NA	erythrocyte membrane protein 1 (PfEMP1), exon 2, pseudogene	pseudogene
PF3D7_0805700	6049.06	1.06806	0.286391	13.6851	0.00106739	0.00537268	serine/threonine protein kinase, FIKK family	protein_coding_gene
PF3D7_1003000	387.246	1.0611	0.351716	12.9792	0.00151916	0.00706762	guanylate cyclase organizer UGO, putative	protein_coding_gene
PF3D7_0803200	3069.18	1.06051	0.212436	30.2229	2.73641e-07	7.36708e-06	filament assembling protein, putative	protein_coding_gene
PF3D7_0404400	182.004	1.05992	0.464096	12.5099	0.00192093	0.00845685	6-cysteine protein P36	protein_coding_gene
PF3D7_0816500	3.65881	1.05868	1.7445	0.365407	0.833015	NA	small heat shock protein HSP20, putative	protein_coding_gene
PF3D7_1128900	2116.46	1.05046	0.246653	19.5126	5.79291e-05	0.000506343	conserved protein, unknown function	protein_coding_gene
PF3D7_0613300	774.461	1.04643	0.433754	13.6602	0.00108073	0.00542664	rhoptry protein ROP14	protein_coding_gene
PF3D7_0403900	3325.44	1.04083	0.225152	28.2862	7.20653e-07	1.60585e-05	SET domain protein, putative	protein_coding_gene
PF3D7_1122700	801.672	1.04055	0.241681	21.2866	2.386e-05	0.000246211	conserved Plasmodium protein, unknown function	protein_coding_gene
PF3D7_0401400	1.00005	1.04044	3.94174	0.494414	0.780979	NA	rifin	protein_coding_gene
PF3D7_0806300	2691.74	1.03962	0.231293	35.9092	1.59376e-08	9.73505e-07	ferlin-like protein, putative	protein_coding_gene
PF3D7_0611600	3386.57	1.03841	0.228288	20.4995	3.53663e-05	0.000340671	basal complex transmembrane protein 1	protein_coding_gene
PF3D7_0600700	3.96726	1.0357	1.71717	0.354899	0.837403	NA	rifin	protein_coding_gene
PF3D7_0628100	3394.09	1.03085	0.267836	41.5552	9.47132e-10	9.64218e-08	HECT domain-containing protein 1, putative	protein_coding_gene
PF3D7_1236800	794.491	1.02951	0.20751	29.6271	3.68598e-07	9.47408e-06	protein-S-isoprenylcysteine O-methyltransferase	protein_coding_gene
PF3D7_0403600	6070.62	1.02268	0.317933	12.3213	0.0021109	0.00905767	conserved Plasmodium protein, unknown function	protein_coding_gene
PF3D7_0405900	2377.66	1.021	0.370432	8.77864	0.0124092	0.0356352	apical sushi protein	protein_coding_gene
PF3D7_0302200	66.1556	1.0193	0.589153	4.97149	0.0832633	0.149042	cytoadherence linked asexual protein 3.2	protein_coding_gene
PF3D7_1138000	2206.98	1.01923	0.234303	30.7972	2.05339e-07	6.23463e-06	conserved Plasmodium protein, unknown function	protein_coding_gene
PF3D7_1467000	44.935	1.00868	0.503376	4.84239	0.0888154	0.156794	magnesium transporter, putative	protein_coding_gene
PF3D7_1454800	84.9393	1.00756	1.7286	2.46615	0.291395	0.389526	conserved Plasmodium protein, unknown function	protein_coding_gene
PF3D7_1477300	242.71	1.00261	0.348372	20.1566	4.19807e-05	0.000391317	Plasmodium exported protein (PHIST), unknown function	protein_coding_gene
PF3D7_0815900	1881.45	0.986381	0.221787	19.8611	4.86652e-05	0.00044328	dihydrolipoyl dehydrogenase, apicoplast	protein_coding_gene
PF3D7_0310400	16216.6	0.986362	0.233782	17.6825	0.000144644	0.00106373	parasite-infected erythrocyte surface protein	protein_coding_gene
PF3D7_0401500	4.48271	0.983641	2.03635	2.06874	0.35545	NA	stevor, pseudogene	pseudogene
PF3D7_1018200	1819.7	0.983466	0.248672	22.2726	1.45738e-05	0.000164137	serine/threonine protein phosphatase 8, putative	protein_coding_gene
PF3D7_0717600	4213.53	0.980738	0.249149	21.7157	1.92532e-05	0.00020869	inner membrane complex protein, putative	protein_coding_gene
PF3D7_1334900	11.4415	0.976859	1.14926	1.03916	0.594771	NA	MSP7-like protein, fragment, pseudogene	pseudogene
PF3D7_1327500	295.881	0.976268	0.301269	15.1651	0.000509261	0.00297088	conserved protein, unknown function	protein_coding_gene
PF3D7_1238600	2802.1	0.974639	0.193555	25.4909	2.91559e-06	4.68662e-05	sphingomyelin phosphodiesterase	protein_coding_gene
PF3D7_1027300	39618.1	0.974362	0.197671	23.9431	6.32152e-06	8.48895e-05	peroxiredoxin	protein_coding_gene
PF3D7_0220800	4127.11	0.973523	0.214604	20.1593	4.19235e-05	0.000391317	cytoadherence linked asexual protein 2	protein_coding_gene
PF3D7_0308100	1525.39	0.967949	0.220825	28.8856	5.34039e-07	1.27776e-05	zinc finger protein, putative	protein_coding_gene
PF3D7_API01700	0.478538	0.962167	4.03123	0.0803142	0.960639	NA	ribosomal protein S3, putative	protein_coding_gene
PF3D7_0321100	1231.13	0.955733	0.205665	35.9517	1.56023e-08	9.64373e-07	conserved Plasmodium protein, unknown function	protein_coding_gene
PF3D7_0916000	1644.47	0.95484	0.190809	35.8436	1.6469e-08	9.82837e-07	major facilitator superfamily domain-containing protein, putative	protein_coding_gene
PF3D7_API02200	0.162424	0.954173	4.08047	0.0778173	0.961839	NA	apicoplast ribosomal protein L6	protein_coding_gene
PF3D7_1100800	0.162424	0.954173	4.08047	0.0778173	0.961839	NA	Pfmc-2TM Maurer's cleft two transmembrane protein	protein_coding_gene
PF3D7_0425300	0.162424	0.954173	4.08047	0.0778173	0.961839	NA	Plasmodium exported protein (PHISTa), unknown function, pseudogene	pseudogene
PF3D7_0221650	0.162424	0.954173	4.08047	0.0778173	0.961839	NA	Plasmodium exported protein, unknown function, pseudogene	pseudogene
PF3D7_1005800	104.422	0.951564	0.501382	3.773	0.151601	0.235451	conserved Plasmodium membrane protein, unknown function	protein_coding_gene
PF3D7_1140000	52.1989	0.950122	0.637701	2.3629	0.306833	0.40588	carbonic anhydrase	protein_coding_gene
PF3D7_0802100	6661.37	0.949133	0.235499	38.9183	3.53998e-09	2.91739e-07	AP2 domain transcription factor AP2-LT	protein_coding_gene
PF3D7_0817600	3108.24	0.948824	0.189258	24.7935	4.13199e-06	6.23642e-05	conserved protein, unknown function	protein_coding_gene
PF3D7_0303200	11503.6	0.947587	0.20991	33.9342	4.27842e-08	2.05681e-06	lipin, putative	protein_coding_gene
PF3D7_0106500	2473.98	0.946679	0.202442	36.5532	1.15498e-08	7.89036e-07	conserved Plasmodium protein, unknown function	protein_coding_gene
PF3D7_0512400	42.3218	0.942301	0.689741	1.7605	0.414679	0.509428	conserved Plasmodium protein, unknown function	protein_coding_gene
PF3D7_0924000	8138.97	0.939736	0.313874	9.13632	0.010377	0.0313059	patatin-like phospholipase, putative	protein_coding_gene
PF3D7_0616500	31.4331	0.938583	0.80862	1.60805	0.447524	0.540462	TRAP-like protein	protein_coding_gene
PF3D7_0715300	2160.03	0.938477	0.206055	25.0007	3.72529e-06	5.77665e-05	calcium/calmodulin-dependent protein kinase, putative	protein_coding_gene
PF3D7_1121900	1474.26	0.936797	0.19625	22.7735	1.13446e-05	0.000136662	3-phosphoinositide-dependent protein kinase 1	protein_coding_gene
PF3D7_0415700	1017.28	0.934639	0.231842	19.7125	5.24181e-05	0.000469232	conserved Plasmodium protein, unknown function	protein_coding_gene
PF3D7_1253400	11835.4	0.930787	0.232082	24.6156	4.51629e-06	6.56823e-05	acyl-CoA synthetase	protein_coding_gene
PF3D7_0511200	8552.85	0.930373	0.226806	17.3696	0.000169137	0.00121164	stearoyl-CoA desaturase	protein_coding_gene
PF3D7_0935400	329.318	0.927893	0.246126	19.4616	5.94241e-05	0.000515936	gametocyte development protein 1	protein_coding_gene
PF3D7_0404500	608.65	0.92746	0.295556	11.0978	0.00389169	0.0143506	6-cysteine protein P52	protein_coding_gene
PF3D7_1116100	11329.1	0.927164	0.235203	23.788	6.83143e-06	9.00223e-05	serine esterase, putative	protein_coding_gene
PF3D7_0216800	1783.98	0.926635	0.225814	30.8728	1.97728e-07	6.11073e-06	TMEM121 domain-containing protein, putative	protein_coding_gene
PF3D7_0815500	4271.28	0.924776	0.236493	17.213	0.000182915	0.00128628	conserved Plasmodium protein, unknown function	protein_coding_gene
PF3D7_1335100	5642.21	0.923068	0.271663	11.8272	0.00270249	0.0109963	merozoite surface protein 7	protein_coding_gene
PF3D7_0626400	5155.74	0.921925	0.273313	11.5038	0.00317676	0.0123827	CRAL/TRIO domain-containing protein, putative	protein_coding_gene
PF3D7_0926600	283.456	0.921878	0.495596	5.53452	0.0628338	0.120738	conserved Plasmodium membrane protein, unknown function	protein_coding_gene
PF3D7_0935800	22797.2	0.919769	0.346451	17.7765	0.000138004	0.00102506	cytoadherence linked asexual protein 9	protein_coding_gene
PF3D7_1117200	412.793	0.91695	0.275194	13.1939	0.00136451	0.00646988	conserved Plasmodium protein, unknown function	protein_coding_gene
PF3D7_1316700	54.9607	0.916385	0.65509	3.8747	0.144085	0.226351	conserved protein, unknown function	protein_coding_gene
PF3D7_0423300	735.855	0.915974	0.408679	5.36174	0.0685036	0.128913	conserved Plasmodium protein, unknown function	protein_coding_gene
PF3D7_1478200	0.146018	0.914575	4.07467	0.147101	0.929089	NA	Plasmodium exported protein, unknown function, pseudogene	pseudogene
PF3D7_1000300	0.146018	0.914575	4.07467	0.147101	0.929089	NA	rifin	protein_coding_gene
PF3D7_1479400	0.146018	0.914575	4.07467	0.147101	0.929089	NA	rifin	protein_coding_gene
PF3D7_API03500	0.146018	0.914575	4.07467	0.147101	0.929089	NA	apicoplast ribosomal protein L11, putative	protein_coding_gene
PF3D7_1215500	0.146018	0.914575	4.07467	0.147101	0.929089	NA	conserved Plasmodium protein, unknown function	protein_coding_gene
PF3D7_0221600	0.146018	0.914575	4.07467	0.147101	0.929089	NA	Plasmodium exported protein, unknown function, pseudogene	pseudogene
PF3D7_0713000	0.146018	0.914575	4.07467	0.147101	0.929089	NA	rifin	protein_coding_gene
PF3D7_1463900	2374.97	0.911865	0.257557	13.5391	0.0011482	0.00569385	rhoptry neck protein 11, putative	protein_coding_gene
PF3D7_1001600	31257.7	0.911563	0.203959	28.0102	8.2729e-07	1.81236e-05	exported lipase 2	protein_coding_gene
PF3D7_0620400	141.092	0.905041	0.375347	13.4955	0.0011735	0.00578068	merozoite surface protein 10	protein_coding_gene
PF3D7_1373000	7.23646	0.902386	1.32873	2.51858	0.283856	NA	rifin	protein_coding_gene
PF3D7_1458300	4746.46	0.901032	0.214207	17.369	0.000169191	0.00121164	alpha/beta hydrolase, putative	protein_coding_gene
PF3D7_1121300	3222.94	0.899347	0.301189	12.0068	0.00247037	0.0102856	tyrosine kinase-like protein	protein_coding_gene
PF3D7_0214900	2471.26	0.897675	0.38292	10.7565	0.00461582	0.0163251	rhoptry neck protein 6	protein_coding_gene
PF3D7_0720300	13.1983	0.897451	1.00261	0.724415	0.696138	0.758679	conserved Plasmodium protein, unknown function	protein_coding_gene
PF3D7_API03600	161.229	0.897225	0.497977	4.25116	0.119364	0.196554	chaperone protein ClpM	protein_coding_gene
PF3D7_1430500	71.413	0.896751	0.659654	1.69931	0.427563	0.52135	conserved Plasmodium protein, unknown function	protein_coding_gene
PF3D7_1131100	5997.97	0.895569	0.177723	38.9474	3.48882e-09	2.91739e-07	serpentine receptor 1, putative	protein_coding_gene
PF3D7_1227300	678.115	0.890379	0.274138	10.2491	0.00594876	0.0200428	conserved Plasmodium protein, unknown function	protein_coding_gene
PF3D7_0412800	0.741541	0.883824	3.99217	0.176751	0.915417	NA	Plasmodium RNA of unknown function RUF6	ncRNA_gene
PF3D7_0506600	1.39131	0.883451	2.83725	0.855711	0.651906	NA	histone deacetylase, putative, pseudogene	pseudogene
PF3D7_1307600	11740.2	0.882461	0.232136	19.9209	4.72323e-05	0.000432504	DNA-directed RNA polymerase subunit alpha, putative	protein_coding_gene
PF3D7_0724900	274.735	0.879021	0.267717	13.8343	0.000990647	0.0050525	kinesin-20, putative	protein_coding_gene
PF3D7_1318200	263.007	0.873294	0.293203	8.76849	0.0124723	0.035777	glycerol-3-phosphate 1-O-acyltransferase	protein_coding_gene
PF3D7_0319000	12492.6	0.872911	0.270292	11.3783	0.00338244	0.0129702	P4-type ATPase ATP7, putative	protein_coding_gene
PF3D7_1228700	6743.66	0.87283	0.209061	21.0953	2.62551e-05	0.000266765	conserved Plasmodium protein, unknown function	protein_coding_gene
PF3D7_API01500	606.538	0.872767	0.330175	6.97509	0.0305758	0.0699338	apicoplast ribosomal protein L2	protein_coding_gene
PF3D7_1449100	2403.89	0.871977	0.183092	31.2933	1.6023e-07	5.23218e-06	CLASP domain-containing protein, putative	protein_coding_gene
PF3D7_0903300	16877.3	0.871163	0.230571	28.0777	7.99854e-07	1.76717e-05	conserved protein, unknown function	protein_coding_gene
PF3D7_1356100	5098.13	0.868417	0.21453	25.7131	2.60902e-06	4.30033e-05	conserved Plasmodium protein, unknown function	protein_coding_gene
PF3D7_0802800	3408.32	0.867011	0.266892	19.1154	7.06534e-05	0.000596475	serine/threonine protein phosphatase 2B catalytic subunit A	protein_coding_gene
PF3D7_1300200	15.5941	0.864041	0.924112	0.912967	0.633508	0.705528	rifin	protein_coding_gene
PF3D7_1148500	6.09162	0.859511	1.51129	2.12324	0.345896	NA	non-coding RNA	ncRNA_gene
PF3D7_0207700	14332.2	0.856238	0.24689	39.55	2.58117e-09	2.3106e-07	serine repeat antigen 4	protein_coding_gene
PF3D7_0607600	5312.61	0.856202	0.182578	23.3309	8.5853e-06	0.000107929	spindle assembly abnormal protein 6, putative	protein_coding_gene
PF3D7_0701000	0.538798	0.853312	4.04063	0.0237849	0.988178	NA	erythrocyte membrane protein 1 (PfEMP1), pseudogene	pseudogene
PF3D7_0612200	5343.49	0.852061	0.229756	34.1137	3.91114e-08	1.91572e-06	leucine-rich repeat protein	protein_coding_gene
PF3D7_1451600	48.6539	0.850845	0.528358	2.69637	0.259712	0.356537	LCCL domain-containing protein	protein_coding_gene
PF3D7_0530900	935.65	0.847809	0.250751	18.7721	8.38851e-05	0.000685876	formin 1	protein_coding_gene
PF3D7_0206800	14600.8	0.847529	0.782085	1.98064	0.371458	0.468792	merozoite surface protein 2	protein_coding_gene
PF3D7_1036300	35.4487	0.84607	0.758796	1.27082	0.529718	0.615691	duffy binding-like merozoite surface protein 2	protein_coding_gene
PF3D7_0212900	7594.84	0.843797	0.174577	28.0656	8.04701e-07	1.77034e-05	arginyl-tRNA--protein transferase	protein_coding_gene
PF3D7_0607700	2830.85	0.841816	0.296053	13.2533	0.0013246	0.00631665	conserved Plasmodium protein, unknown function	protein_coding_gene
PF3D7_1019100	956.305	0.838901	0.302171	16.2225	0.00030014	0.00192021	conserved Plasmodium protein, unknown function	protein_coding_gene
PF3D7_1219800	1.14363	0.8369	3.93761	0.589148	0.744849	NA	conserved Plasmodium protein, unknown function	protein_coding_gene
PF3D7_0612700	1865.28	0.83689	0.215419	19.1609	6.90661e-05	0.000584978	6-cysteine protein P12	protein_coding_gene
PF3D7_1138400	5072.75	0.833525	0.219365	19.4168	6.07713e-05	0.000524128	guanylyl cyclase alpha	protein_coding_gene
PF3D7_1425800	3810.01	0.831291	0.194185	25.9911	2.27039e-06	3.87759e-05	conserved Plasmodium protein, unknown function	protein_coding_gene
PF3D7_0502500	8.14758	0.830157	1.33681	2.48434	0.288757	NA	conserved Plasmodium protein, unknown function	protein_coding_gene
PF3D7_1322600	588.69	0.826688	0.299235	9.16628	0.0102228	0.0309304	conserved Plasmodium protein, unknown function	protein_coding_gene
PF3D7_0505400	4731.81	0.825999	0.24223	12.2085	0.00223335	0.00946712	conserved protein, unknown function	protein_coding_gene
PF3D7_1035300	712.813	0.824637	0.5577	7.61799	0.0221704	0.0549971	glutamate-rich protein GLURP	protein_coding_gene
PF3D7_0200200	0.580625	0.821263	3.97612	0.292174	0.864082	NA	rifin	protein_coding_gene
PF3D7_1142900	242.87	0.81867	0.291984	7.97892	0.0185097	0.0482443	conserved Plasmodium protein, unknown function	protein_coding_gene
PF3D7_1312100	3005.36	0.817255	0.233822	32.6104	8.29366e-08	3.18968e-06	GYF domain-containing protein, putative	protein_coding_gene
PF3D7_0700700	6.86272	0.816743	1.33676	1.84763	0.397002	NA	stevor, pseudogene	pseudogene
PF3D7_1007200	2741.6	0.814533	0.198013	21.845	1.80474e-05	0.000197683	rho GTPase-activating protein, putative	protein_coding_gene
PF3D7_1440900	120.771	0.805901	0.470477	3.24173	0.197728	0.289592	conserved Plasmodium protein, unknown function	protein_coding_gene
PF3D7_0423400	565.995	0.803685	1.12065	0.468595	0.791126	0.834016	apical asparagine-rich protein AARP	protein_coding_gene
PF3D7_1213500	13.816	0.803637	0.872374	1.39217	0.498534	0.586537	integral membrane protein GPR180, putative	protein_coding_gene
PF3D7_1459900	125.694	0.799442	0.784165	2.58437	0.27467	0.372541	rhoptry protein, putative	protein_coding_gene
PF3D7_0726300	1995.72	0.790003	0.284487	10.3966	0.00552588	0.0189251	DNA mismatch repair protein PMS1, putative	protein_coding_gene
PF3D7_1435300	8119.68	0.789264	0.217519	22.8177	1.1097e-05	0.000134302	glutamate synthase [NADH], putative	protein_coding_gene
PF3D7_1400700	7.54142	0.788803	1.46848	0.431727	0.805845	NA	stevor	protein_coding_gene
PF3D7_0322300	12532.8	0.78866	0.189928	19.4688	5.92099e-05	0.000515801	diacylglycerol O-acyltransferase	protein_coding_gene
PF3D7_0905500	458.003	0.785837	0.410458	5.85679	0.0534829	0.106883	conserved protein, unknown function	protein_coding_gene
PF3D7_1470800	5004.32	0.785509	0.178135	26.4216	1.8307e-06	3.31469e-05	conserved Plasmodium protein, unknown function	protein_coding_gene
PF3D7_0516800	9599.53	0.784069	0.265575	27.3651	1.14223e-06	2.2722e-05	AP2 domain transcription factor AP2-O2, putative	protein_coding_gene
PF3D7_0209600	3737.42	0.783911	0.223819	20.3928	3.73046e-05	0.00035461	transporter, putative	protein_coding_gene
PF3D7_0406700	2395.98	0.783813	0.199149	23.919	6.39803e-06	8.53948e-05	KLRAQ domain-containing protein, putative	protein_coding_gene
PF3D7_1434400	735.757	0.783811	0.337859	5.26085	0.0720478	0.134203	conserved protein, unknown function	protein_coding_gene
PF3D7_0509100	11912.3	0.780848	0.235071	29.7059	3.54356e-07	9.15331e-06	structural maintenance of chromosomes protein 4, putative	protein_coding_gene
PF3D7_0936100	5613.26	0.77939	0.230759	11.9306	0.00256625	0.010563	early transcribed membrane protein	protein_coding_gene
PF3D7_0207800	12946.5	0.779207	0.265225	25.8791	2.40113e-06	4.02692e-05	serine repeat antigen 3	protein_coding_gene
PF3D7_1372100	139.553	0.77868	0.372602	11.4577	0.00325088	0.0126054	Plasmodium exported protein (PHISTb), unknown function	protein_coding_gene
PF3D7_1129300	442.519	0.774969	0.449481	4.44525	0.108324	0.182545	conserved Plasmodium protein, unknown function	protein_coding_gene
PF3D7_1361800	13615.2	0.774271	0.342506	10.5993	0.00499333	0.0174464	glideosome-associated connector	protein_coding_gene
PF3D7_0827400	94.6839	0.773995	0.424311	5.91222	0.0520208	0.104774	conserved protein, unknown function	protein_coding_gene
PF3D7_0407700	4059.55	0.772639	0.174184	34.5581	3.13188e-08	1.60997e-06	conserved Plasmodium protein, unknown function	protein_coding_gene
PF3D7_0504500	116.099	0.772313	0.385945	4.88758	0.0868313	0.15378	MOLO1 domain-containing protein, putative	protein_coding_gene
PF3D7_1118700	1713.32	0.771484	0.331427	5.37712	0.0679788	0.128158	myosin light chain B	protein_coding_gene
PF3D7_0416400	29643.6	0.770356	0.23288	10.9677	0.00415329	0.0150729	histone acetyltransferase, putative	protein_coding_gene
PF3D7_0821000	8764.5	0.769066	0.241559	13.5667	0.00113246	0.00563066	conserved Plasmodium protein, unknown function	protein_coding_gene
PF3D7_0400800	5.48682	0.768532	1.66125	1.09417	0.578633	NA	stevor	protein_coding_gene
PF3D7_0508400	593.757	0.768187	0.409088	3.35629	0.18672	0.277498	conserved protein, unknown function	protein_coding_gene
PF3D7_0932100	5369.45	0.766536	0.227346	30.4068	2.49598e-07	7.07677e-06	protein MAM3, putative	protein_coding_gene
PF3D7_1429100	12591.2	0.766408	0.245192	9.59628	0.00824507	0.0260233	ribosomal protein L15, apicoplast, putative	protein_coding_gene
PF3D7_1005200	14.5513	0.764537	0.975979	0.600829	0.740511	0.794802	conserved Plasmodium protein, unknown function	protein_coding_gene
PF3D7_0103100	2057.37	0.764078	0.235377	23.9471	6.30879e-06	8.48895e-05	vacuolar protein sorting-associated protein 51, putative	protein_coding_gene
PF3D7_1313600	583.297	0.760321	0.315602	8.18345	0.0167104	0.0444418	Clu domain-containing protein, putative	protein_coding_gene
PF3D7_1107100	3283.32	0.758306	0.184668	17.3411	0.000171562	0.00122693	nucleic acid binding protein, putative	protein_coding_gene
PF3D7_1476300	1711.53	0.756913	0.267607	9.45915	0.00883023	0.0275024	Plasmodium exported protein (PHISTb), unknown function	protein_coding_gene
PF3D7_1117400	349.619	0.755384	0.341309	4.75367	0.0928438	0.161814	conserved Plasmodium protein, unknown function	protein_coding_gene
PF3D7_0621100	3769.84	0.754682	0.177174	18.2827	0.000107142	0.000832757	conserved Plasmodium protein, unknown function	protein_coding_gene
PF3D7_0314800	325.182	0.753636	0.366555	4.65703	0.0974405	0.167958	conserved Plasmodium protein, unknown function	protein_coding_gene
PF3D7_0613800	21271	0.75358	0.251306	30.6747	2.18306e-07	6.51404e-06	AP2 domain transcription factor, putative	protein_coding_gene
PF3D7_1450500	1035.21	0.753469	0.256745	28.6558	5.99063e-07	1.40739e-05	conserved Plasmodium protein, unknown function	protein_coding_gene
PF3D7_0223400	36.1534	0.753295	0.552993	2.00208	0.367497	0.464697	rifin	protein_coding_gene
PF3D7_0205200	82.3393	0.75147	0.453139	2.88972	0.235779	0.330498	MORN repeat protein, putative	protein_coding_gene
PF3D7_0623400	737.312	0.750829	0.208164	12.8736	0.00160154	0.00733262	MEI2-like RNA-binding protein	protein_coding_gene
PF3D7_1205200	201.094	0.750803	0.4046	8.88849	0.011746	0.0343579	HAD domain ookinete protein, putative	protein_coding_gene
PF3D7_0920200	8137.05	0.750337	0.298664	6.15799	0.0460055	0.0954297	CS domain protein, putative	protein_coding_gene
PF3D7_1308000	1883.31	0.749947	0.329975	4.95057	0.0841389	0.150265	conserved Plasmodium membrane protein, unknown function	protein_coding_gene
PF3D7_1413600	70.8587	0.749893	0.600157	1.41487	0.492906	0.581101	conserved Plasmodium protein, unknown function	protein_coding_gene
PF3D7_1131700	7.86771	0.74791	1.11232	0.444787	0.8006	NA	conserved Plasmodium protein, unknown function	protein_coding_gene
PF3D7_0501500	2132.37	0.746677	1.03094	0.714004	0.699771	0.761839	rhoptry-associated protein 3	protein_coding_gene
PF3D7_0312900	310.721	0.745339	0.51388	11.1554	0.00378122	0.0140283	hypothetical protein	protein_coding_gene
PF3D7_0931700	594.202	0.745157	0.272354	10.2192	0.00603855	0.0202795	PIH1 domain-containing protein, putative	protein_coding_gene
PF3D7_0321400	468.107	0.743747	0.595765	2.61739	0.270173	0.36769	pseudo protein kinase 1, putative	protein_coding_gene
PF3D7_1436600	3354.62	0.743422	0.258414	11.9356	0.00255989	0.0105522	cGMP-dependent protein kinase	protein_coding_gene
PF3D7_1035900	663.844	0.742505	0.503931	4.3841	0.111688	0.186934	merozoites-associated armadillo repeats protein	protein_coding_gene
PF3D7_1031400	925.672	0.741228	0.246983	11.1092	0.00386962	0.0142794	OTU-like cysteine protease	protein_coding_gene
PF3D7_0605500	1323.06	0.738444	0.244996	10.7528	0.0046244	0.0163444	cyclin dependent kinase binding protein, putative	protein_coding_gene
PF3D7_0829400	1597.68	0.738253	0.248668	21.1606	2.54123e-05	0.000260238	prolyl 4-hydroxylase subunit alpha, putative	protein_coding_gene
PF3D7_0414800	140.292	0.738128	0.326854	5.46944	0.0649123	0.12377	conserved Plasmodium protein, unknown function	protein_coding_gene
PF3D7_1325400	8860.11	0.736723	0.211783	32.9043	7.16027e-08	2.90438e-06	CRWN-like protein, putative	protein_coding_gene
PF3D7_API06700	120.316	0.735169	0.47204	4.12133	0.127369	0.205949	large subunit ribosomal RNA	ncRNA_gene
PF3D7_1409100	11632.7	0.734722	0.197995	28.9028	5.29456e-07	1.27266e-05	aldo-keto reductase, putative	protein_coding_gene
PF3D7_0404800	453.817	0.733101	0.242434	16.2208	0.000300393	0.00192021	sporozoite-specific protein S10, putative	protein_coding_gene
PF3D7_1417000	42.7906	0.7301	0.565659	1.78975	0.408658	0.503382	inner membrane complex protein 1l	protein_coding_gene
PF3D7_1218100	75.4726	0.728026	0.413486	3.0895	0.213366	0.306359	conserved Plasmodium protein, unknown function	protein_coding_gene
PF3D7_1307900	708.064	0.727809	0.336058	4.80667	0.0904157	0.158744	tripartite motif protein, putative	protein_coding_gene
PF3D7_1241000	12.4998	0.7259	0.982816	3.80413	0.14926	0.23272	Plasmodium RNA of unknown function RUF6	ncRNA_gene
PF3D7_1116000	5388.73	0.7238	0.33745	6.47727	0.0392173	0.0848048	rhoptry neck protein 4	protein_coding_gene
PF3D7_1144400	391.164	0.719702	0.307699	5.66836	0.0587668	0.114878	conserved Plasmodium protein, unknown function	protein_coding_gene
PF3D7_1145400	10294.9	0.719345	0.260881	8.3733	0.0151971	0.0412891	dynamin-like protein	protein_coding_gene
PF3D7_0630400	123.054	0.716804	0.45419	2.543	0.280411	0.378173	conserved Plasmodium protein, unknown function	protein_coding_gene
PF3D7_0207500	35788.7	0.715545	0.239867	26.7389	1.56211e-06	2.93859e-05	serine repeat antigen 6	protein_coding_gene
PF3D7_1413400	5342.11	0.714563	0.260458	8.91877	0.0115695	0.0339755	30S ribosomal protein S9, putative	protein_coding_gene
PF3D7_1426600	2058.15	0.712742	0.2145	32.6878	7.97862e-08	3.09797e-06	conserved Plasmodium protein, unknown function	protein_coding_gene
PF3D7_1133300	856.288	0.711286	0.255766	9.66759	0.00795627	0.0253506	LEM3/CDC50 family protein, putative	protein_coding_gene
PF3D7_1035100	2185.4	0.709178	0.375546	15.0908	0.000528548	0.00306274	probable protein, unknown function	protein_coding_gene
PF3D7_0607200	3407.42	0.708355	0.234258	9.89515	0.00710062	0.0230415	RING zinc finger protein, putative	protein_coding_gene
PF3D7_1117000	617.461	0.708016	0.215075	49.873	1.47981e-11	4.51952e-09	MFS domain-containing protein P115, putative	protein_coding_gene
PF3D7_0927400	228.744	0.706969	0.352222	4.47954	0.106483	0.179967	conserved Plasmodium protein, unknown function	protein_coding_gene
PF3D7_1035600	814.473	0.706131	0.41558	7.87836	0.0194642	0.0501031	merozoite surface protein	protein_coding_gene
PF3D7_0908200	2881.44	0.702225	0.227885	19.4969	5.83852e-05	0.000509472	conserved Plasmodium protein, unknown function	protein_coding_gene
PF3D7_0208000	4109.34	0.701126	0.182981	21.4858	2.15982e-05	0.000227923	serine repeat antigen 1	protein_coding_gene
PF3D7_1108800	30.4854	0.699728	0.623915	1.57012	0.456092	0.547902	conserved Plasmodium protein, unknown function	protein_coding_gene
PF3D7_1364600	4095.26	0.698566	0.179552	15.0706	0.000533913	0.00309039	aldehyde reductase, putative	protein_coding_gene
PF3D7_1436200	1723.25	0.698295	0.356696	12.4307	0.00199848	0.00871209	basal complex protein BCP1	protein_coding_gene
PF3D7_1331000	806.015	0.696649	0.307491	5.78397	0.0554659	0.109832	protein kinase, putative	protein_coding_gene
PF3D7_0618900	4160.15	0.696609	0.188429	14.5229	0.000702075	0.00383702	phosphatidylinositol N-acetylglucosaminyltransferase subunit GPI1	protein_coding_gene
PF3D7_1432200	582.608	0.696207	0.261463	7.06581	0.0292199	0.0677577	conserved Plasmodium protein, unknown function	protein_coding_gene
PF3D7_0809900	3916.47	0.693025	0.24076	9.11404	0.0104933	0.0315467	JmjC domain-containing protein 1, putative	protein_coding_gene
PF3D7_1309400	9773.84	0.690931	0.286025	5.69098	0.0581058	0.113859	HORMA domain protein, putative	protein_coding_gene
PF3D7_1021300	4515	0.689883	0.188039	18.9454	7.69228e-05	0.000639013	apicoplast integral membrane protein, putative	protein_coding_gene
PF3D7_0832400	9.50585	0.689557	1.73069	0.665224	0.717048	NA	stevor	protein_coding_gene
PF3D7_1031200	341.304	0.689127	0.523134	1.55128	0.460408	0.551552	MORN repeat-containing protein 1	protein_coding_gene
PF3D7_0508500	6976.79	0.68635	0.273059	12.291	0.00214307	0.00916544	ND6 protein, putative	protein_coding_gene
PF3D7_0901400	1.64459	0.685677	3.24629	0.56402	0.754266	NA	rifin	protein_coding_gene
PF3D7_0911600	2497.17	0.685373	0.218806	9.67988	0.00790752	0.0252496	conserved Plasmodium protein, unknown function	protein_coding_gene
PF3D7_0204100	5089.86	0.68242	0.234067	10.4343	0.00542284	0.0187328	Sel1 repeat-containing protein, putative	protein_coding_gene
PF3D7_0105800	12086.5	0.681348	0.227142	8.84237	0.01202	0.0348257	cyclin-dependent kinases regulatory subunit, putative	protein_coding_gene
PF3D7_1227500	11933.5	0.680444	0.208677	32.6851	7.98955e-08	3.09797e-06	protein SOC2, putative	protein_coding_gene
PF3D7_1449200	11905.3	0.679945	0.82732	1.52472	0.466564	0.557258	conserved Plasmodium protein, unknown function	protein_coding_gene
PF3D7_1359800	102.916	0.67888	0.520128	1.79251	0.408096	0.502928	ADP-ribosylation factor, putative	protein_coding_gene
PF3D7_0404600	9497.08	0.67882	0.26808	31.4244	1.50063e-07	5.12583e-06	conserved Plasmodium membrane protein, unknown function	protein_coding_gene
PF3D7_1232300	1919.14	0.677056	0.253558	7.08456	0.0289472	0.0672568	cytochrome b5, putative	protein_coding_gene
PF3D7_1334600	2311.92	0.675734	0.226384	24.3618	5.12743e-06	7.25384e-05	MSP7-like protein	protein_coding_gene
PF3D7_1318700	957.31	0.674538	0.380668	2.93188	0.230861	0.325346	protein AAP4	protein_coding_gene
PF3D7_0904100	14094.3	0.673115	0.280793	7.58257	0.0225666	0.0556018	AP-4 complex subunit epsilon, putative	protein_coding_gene
PF3D7_1410800	831.818	0.671588	0.283171	7.82741	0.0199664	0.0508913	ankyrin-repeat protein, putative	protein_coding_gene
PF3D7_0106000	7722.99	0.670791	0.240638	15.1568	0.000511383	0.00297323	conserved protein, unknown function	protein_coding_gene
PF3D7_API01300	38.731	0.670785	0.592035	2.27931	0.319929	0.419039	50S ribosomal protein L4, putative	protein_coding_gene
PF3D7_1008500	6385.02	0.669901	0.228283	10.0449	0.00658844	0.0218297	protein GPR89, putative	protein_coding_gene
PF3D7_1222700	3252.51	0.666351	0.187225	12.7898	0.00167004	0.00759268	glideosome-associated protein 45	protein_coding_gene
PF3D7_1234600	4603.6	0.666118	0.200559	18.9512	7.67012e-05	0.000638194	protein TOC75, putative	protein_coding_gene
PF3D7_0114400	0.835079	0.664986	3.96353	0.56432	0.754153	NA	erythrocyte membrane protein 1 (PfEMP1), exon 2, pseudogene	pseudogene
PF3D7_1028700	6443.97	0.663062	0.169174	18.7126	8.64176e-05	0.000701645	merozoite TRAP-like protein	protein_coding_gene
PF3D7_1248000	334.796	0.661185	0.317635	4.78716	0.0913021	0.159933	tRNA-splicing endonuclease, putative	protein_coding_gene
PF3D7_1220900	62045.9	0.660784	0.216184	12.279	0.00215602	0.00920563	heterochromatin protein 1	protein_coding_gene
PF3D7_0317200	24045.3	0.65858	0.245739	16.9036	0.000213512	0.00145671	cdc2-related protein kinase 4	protein_coding_gene
PF3D7_1439500	1478.86	0.657932	0.261121	11.2084	0.00368232	0.0137941	oocyst rupture protein 2, putative	protein_coding_gene
PF3D7_1005900	6510.71	0.655054	0.175364	26.1858	2.05985e-06	3.5653e-05	conserved protein, unknown function	protein_coding_gene
PF3D7_0412600	11.3373	0.653674	1.54649	0.255415	0.880111	NA	rifin, pseudogene	pseudogene
PF3D7_0822600	17576.3	0.652771	0.232145	8.18449	0.0167017	0.0444418	protein transport protein SEC23	protein_coding_gene
PF3D7_0701400	3.20629	0.650949	3.1186	1.93393	0.380235	NA	exported protein family 4, pseudogene	pseudogene
PF3D7_1220300	6386.17	0.648806	0.177887	47.0857	5.9631e-11	1.19079e-08	cell cycle associated protein, putative	protein_coding_gene
PF3D7_0109850	1899.75	0.648705	0.268657	15.0602	0.000536697	0.00309959	phosphatidate cytidylyltransferase, putative	protein_coding_gene
PF3D7_1338600	10561.3	0.648488	0.286433	7.09941	0.0287332	0.0669581	conserved protein, unknown function	protein_coding_gene
PF3D7_1104200	16845.8	0.648322	0.326184	3.90538	0.141892	0.223921	chromatin remodeling protein	protein_coding_gene
PF3D7_0715200	6795.19	0.647494	0.195794	28.4601	6.60631e-07	1.50438e-05	conserved Plasmodium protein, unknown function	protein_coding_gene
PF3D7_0802600	1660.09	0.646326	0.233644	20.9947	2.7609e-05	0.000277265	adenylyl cyclase beta	protein_coding_gene
PF3D7_0518400	97.1333	0.644086	0.421388	3.03045	0.219759	0.313115	cyclin, putative	protein_coding_gene
PF3D7_0928000	6662.87	0.641923	0.204998	11.8103	0.00272533	0.0110719	cytochrome c oxidase subunit 6B, putative	protein_coding_gene
PF3D7_0208600	10973.7	0.640148	0.24397	8.22188	0.0163924	0.0437355	ribosome-recycling factor	protein_coding_gene
PF3D7_1320100	2625.99	0.638313	0.186106	12.9278	0.00155874	0.00718736	ATP-dependent Clp protease adapter protein ClpS	protein_coding_gene
PF3D7_0510000	1553.84	0.637626	0.265599	6.51696	0.0384469	0.0834167	conserved Plasmodium protein, unknown function	protein_coding_gene
PF3D7_1028900	100.525	0.637488	0.380202	3.56501	0.168216	0.256876	inner membrane complex protein 1m, putative	protein_coding_gene
PF3D7_1140400	1879.22	0.636726	0.520431	3.0109	0.221918	0.315411	conserved Plasmodium protein, unknown function	protein_coding_gene
PF3D7_1343000	439744	0.63651	0.178991	14.3307	0.000772894	0.00411618	phosphoethanolamine N-methyltransferase	protein_coding_gene
PF3D7_1215400	6506.09	0.635904	0.236098	11.1461	0.0037988	0.0140697	conserved Plasmodium protein, unknown function	protein_coding_gene
PF3D7_1351200	6234.8	0.635684	0.267041	7.69967	0.0212832	0.0532286	conserved Plasmodium protein, unknown function	protein_coding_gene
PF3D7_1455600	1607.96	0.635088	0.188877	18.5667	9.29577e-05	0.00074024	ferlin, putative	protein_coding_gene
PF3D7_0709200	710.408	0.633725	0.234369	7.27299	0.0263445	0.0625426	glutaredoxin-like protein	protein_coding_gene
PF3D7_0416300	5388.63	0.632594	0.262157	12.6848	0.00176005	0.00788316	DNA helicase MCM9, putative	protein_coding_gene
PF3D7_1363700	5407.56	0.632092	0.24034	6.8859	0.0319703	0.0724529	protein AMR1	protein_coding_gene
PF3D7_1458500	6385.24	0.632032	0.182537	29.822	3.34377e-07	8.68043e-06	spindle assembly abnormal protein 4, putative	protein_coding_gene
PF3D7_1138200	153.625	0.632004	0.39129	2.79734	0.246925	0.342241	conserved protein, unknown function	protein_coding_gene
PF3D7_1009700	1135.94	0.631649	0.210648	11.5621	0.00308547	0.0121546	tubulin--tyrosine ligase, putative	protein_coding_gene
PF3D7_1475200	2315.32	0.631429	0.226569	9.44595	0.0088887	0.0276348	conserved protein, unknown function	protein_coding_gene
PF3D7_1437200	60474.4	0.630428	0.196089	17.2112	0.000183081	0.00128628	ribonucleoside-diphosphate reductase large subunit, putative	protein_coding_gene
PF3D7_1411600	1824.93	0.628829	0.320823	3.92166	0.140742	0.22258	GTP-binding protein Obg1	protein_coding_gene
PF3D7_1312800	9182.33	0.628799	0.211716	30.9783	1.87565e-07	5.90204e-06	protein AAP2	protein_coding_gene
PF3D7_1123200	1354.68	0.628728	0.182265	12.8868	0.00159102	0.00729088	leucine-rich repeat protein	protein_coding_gene
PF3D7_1325900	6704.27	0.628337	0.235256	28.8156	5.53049e-07	1.31116e-05	conserved Plasmodium protein, unknown function	protein_coding_gene
PF3D7_0811900	5353.55	0.62702	0.20952	13.1318	0.00140756	0.0066437	RNA-binding protein, putative	protein_coding_gene
PF3D7_0911800	1409.7	0.626748	0.230463	8.30161	0.0157518	0.0425068	conserved Plasmodium protein, unknown function	protein_coding_gene
PF3D7_0828700	329.472	0.626687	0.259259	8.62955	0.0133696	0.0375499	conserved protein, unknown function	protein_coding_gene
PF3D7_0934900	455.965	0.624592	0.345044	7.73403	0.0209207	0.0526262	conserved Plasmodium protein, unknown function	protein_coding_gene
PF3D7_0921700	6244.67	0.622893	0.184152	13.1373	0.00140368	0.0066314	conserved protein, unknown function	protein_coding_gene
PF3D7_1443100	7683.39	0.622818	0.265149	6.12111	0.0468617	0.0968575	conserved Plasmodium protein, unknown function	protein_coding_gene
PF3D7_0518600	6544.52	0.622163	0.227016	8.7363	0.0126747	0.036118	WD repeat-containing protein 26, putative	protein_coding_gene
PF3D7_0529400	22610.5	0.621838	0.220473	11.5777	0.0030615	0.0120877	conserved Plasmodium protein, unknown function	protein_coding_gene
PF3D7_0923500	1526.99	0.621374	0.215177	9.4212	0.00899938	0.0278621	cyclin-dependent kinases regulatory subunit, putative	protein_coding_gene
PF3D7_0719400	8821.06	0.620213	0.270281	12.3352	0.00209629	0.00900676	conserved Plasmodium protein, unknown function	protein_coding_gene
PF3D7_1018100	82.8412	0.62015	0.499465	1.71164	0.424935	0.518632	conserved Plasmodium protein, unknown function	protein_coding_gene
PF3D7_0719800	2242.02	0.620109	0.244425	8.97045	0.0112744	0.0332972	conserved protein, unknown function	protein_coding_gene
PF3D7_1321100	2155.42	0.619395	0.284684	15.9181	0.000349481	0.0021627	protein kinase domain-containing protein, putative	protein_coding_gene
PF3D7_0321900	9857.54	0.619013	0.262427	8.49866	0.0142738	0.039424	cyclic amine resistance locus protein	protein_coding_gene
PF3D7_1472700	6297.07	0.618546	0.189838	21.5814	2.05905e-05	0.00022088	DNA-directed RNA polymerase, alpha subunit, putative	protein_coding_gene
PF3D7_0519900	2873.16	0.618509	0.260548	6.13571	0.0465209	0.096268	conserved protein, unknown function	protein_coding_gene
PF3D7_1216400	11174.8	0.61784	0.252881	8.62411	0.013406	0.0376237	conserved Plasmodium membrane protein, unknown function	protein_coding_gene
PF3D7_1247700	77.021	0.617611	0.465877	2.86793	0.238362	0.333156	conserved Plasmodium protein, unknown function	protein_coding_gene
PF3D7_0517200	1477.31	0.617581	0.491699	3.92044	0.140827	0.222648	conserved Plasmodium protein, unknown function	protein_coding_gene
PF3D7_0500400	2.01991	0.617003	3.59519	1.21339	0.54515	NA	rifin	protein_coding_gene
PF3D7_1371300	185.123	0.616324	0.599512	8.72653	0.0127367	0.0362153	28S ribosomal RNA	ncRNA_gene
PF3D7_0713800	1206.91	0.615817	0.214393	8.49733	0.0142833	0.039424	negative elongation factor A, putative	protein_coding_gene
PF3D7_1003700	3134.44	0.615792	0.316013	3.94772	0.138919	0.220353	MKT1 domain-containing protein, putative	protein_coding_gene
PF3D7_1143500	2258.48	0.615776	0.230716	21.461	2.18682e-05	0.000229838	conserved Plasmodium protein, unknown function	protein_coding_gene
PF3D7_1439000	12856.4	0.615048	0.196903	16.7691	0.000228368	0.00153786	copper transporter	protein_coding_gene
PF3D7_0414700	4172.76	0.613887	0.247612	10.7946	0.00452874	0.0160861	GTP-binding protein, putative	protein_coding_gene
PF3D7_1205000	4239.18	0.613354	0.186725	10.849	0.0044073	0.0158139	conserved protein, unknown function	protein_coding_gene
PF3D7_1224100	4243.01	0.611958	0.208203	12.0677	0.00239627	0.0100577	conserved protein, unknown function	protein_coding_gene
PF3D7_0507300	63.8233	0.611693	0.529002	1.39787	0.497114	0.585132	subtilisin-like ookinete protein SOPT	protein_coding_gene
PF3D7_0528400	1540.85	0.611052	0.458192	2.09328	0.351116	0.448911	palmitoyltransferase DHHC7	protein_coding_gene
PF3D7_1251000	12.016	0.610584	1.1036	0.540789	0.763078	NA	HSP20-like chaperone, putative	protein_coding_gene
PF3D7_1111300	1846.19	0.610381	0.264323	6.03929	0.0488184	0.0999374	protein transport protein BOS1, putative	protein_coding_gene
PF3D7_1025900	3673.81	0.610219	0.189805	25.6901	2.63915e-06	4.32254e-05	conserved protein, unknown function	protein_coding_gene
PF3D7_0706100	4013.37	0.609722	0.268023	5.1346	0.0767426	0.140546	conserved Plasmodium protein, unknown function	protein_coding_gene
PF3D7_1012000	7175.31	0.608793	0.175436	15.4347	0.000445044	0.00264379	RING zinc finger protein, putative	protein_coding_gene
PF3D7_0212100	9929.75	0.60878	0.303759	15.5681	0.000416316	0.00250175	conserved Plasmodium protein, unknown function	protein_coding_gene
PF3D7_0709400	6270.13	0.60847	0.211073	23.6319	7.3857e-06	9.53894e-05	Cg7 protein	protein_coding_gene
PF3D7_0319400	10532.8	0.605086	0.18896	22.6711	1.19409e-05	0.000141223	kinesin-8X	protein_coding_gene
PF3D7_1407000	574.536	0.604966	0.464497	2.09324	0.351122	0.448911	LCCL domain-containing protein	protein_coding_gene
PF3D7_0709100	20945.7	0.604015	0.246382	6.58473	0.0371658	0.0813512	Cg1 protein	protein_coding_gene
PF3D7_0528900	99.7312	0.603331	0.536075	2.66869	0.26333	0.359982	conserved protein, unknown function	protein_coding_gene
PF3D7_0803400	15687.9	0.603259	0.243549	6.0387	0.0488331	0.0999374	DNA repair and recombination protein RAD54, putative	protein_coding_gene
PF3D7_1327100	21.7886	0.602116	0.792594	3.98278	0.136506	0.217538	conserved protein, unknown function	protein_coding_gene
PF3D7_1021200	5829.61	0.60179	0.214378	13.4814	0.00118181	0.00581059	conserved Plasmodium protein, unknown function	protein_coding_gene
PF3D7_1411700	2137.27	0.600943	0.27993	4.51813	0.104448	0.177212	methyltransferase, putative	protein_coding_gene
PF3D7_0409500	6655.47	0.599729	0.227196	15.3122	0.00047314	0.00279152	NAD(P)-binding protein, putative	protein_coding_gene
PF3D7_1239500	4407.08	0.599373	0.237717	6.45653	0.0396262	0.0851923	DNA gyrase subunit B	protein_coding_gene
PF3D7_0909200	66.5755	0.599368	0.624796	1.57034	0.456043	0.547902	GDP-fucose protein O-fucosyltransferase 2	protein_coding_gene
PF3D7_1426700	10881.8	0.599239	0.197038	10.406	0.00550007	0.0188709	phosphoenolpyruvate carboxylase	protein_coding_gene
PF3D7_1133400	3575.9	0.599049	0.218464	8.85063	0.0119704	0.0347598	apical membrane antigen 1	protein_coding_gene
PF3D7_1018900	1186.33	0.59879	0.248664	6.57007	0.0374393	0.0818766	conserved Plasmodium protein, unknown function	protein_coding_gene
PF3D7_0220000	34729.5	0.598303	0.178708	36.4083	1.24173e-08	8.26548e-07	liver stage antigen 3	protein_coding_gene
PF3D7_1306000	402.563	0.597236	0.250699	11.3803	0.00337916	0.0129672	conserved Plasmodium protein, unknown function	protein_coding_gene
PF3D7_1014900	3615.93	0.595808	0.236063	24.7392	4.24572e-06	6.31399e-05	protein KIC8	protein_coding_gene
PF3D7_0208900	246.762	0.595167	0.421342	1.93948	0.379181	0.475993	6-cysteine protein P230p	protein_coding_gene
PF3D7_1121500	913.386	0.594176	0.307625	4.29624	0.116703	0.1934	conserved protein, unknown function	protein_coding_gene
PF3D7_0304700	315.149	0.59227	0.275814	4.58116	0.101208	0.173137	conserved Plasmodium protein, unknown function	protein_coding_gene
PF3D7_0806200	820.527	0.591427	0.220101	7.26658	0.0264291	0.0626383	Dpy-19-like C-mannosyltransferase	protein_coding_gene
PF3D7_0101600	19.0308	0.591119	0.87066	0.61375	0.735743	0.791049	rifin	protein_coding_gene
PF3D7_0705100	676.993	0.590691	0.285521	11.8688	0.00264677	0.0108163	conserved Plasmodium protein, unknown function	protein_coding_gene
PF3D7_1415500	1149.92	0.588398	0.226968	8.78124	0.012393	0.0356085	conserved Plasmodium membrane protein, unknown function	protein_coding_gene
PF3D7_0810300	10450	0.58765	0.182038	23.453	8.07707e-06	0.000102785	protein phosphatase PPM5, putative	protein_coding_gene
PF3D7_0508900	4842.93	0.586443	0.266087	25.1212	3.50757e-06	5.55222e-05	protein AAP6	protein_coding_gene
PF3D7_0505500	32248.8	0.586142	0.227485	15.4393	0.000444016	0.00264373	DNA mismatch repair protein MSH6, putative	protein_coding_gene
PF3D7_1217400	2374.02	0.585641	0.240435	8.44288	0.0146775	0.0401717	conserved protein, unknown function	protein_coding_gene
PF3D7_1134300	6564.99	0.585474	0.181023	35.587	1.87233e-08	1.06826e-06	erythrocyte membrane and merozoite antigen EMMA1	protein_coding_gene
PF3D7_0917000	8485.66	0.585407	0.288674	8.66409	0.0131406	0.0371198	merozoite organizing protein	protein_coding_gene
PF3D7_1022800	8208.81	0.584842	0.279987	7.36822	0.0251196	0.0602619	4-hydroxy-3-methylbut-2-en-1-yl diphosphate synthase (ferredoxin)	protein_coding_gene
PF3D7_1315300	1599.86	0.583889	0.347701	9.50336	0.00863718	0.0270146	conserved protein, unknown function	protein_coding_gene
PF3D7_0404900	5630.09	0.5828	0.219807	13.5904	0.00111914	0.005571	6-cysteine protein P41	protein_coding_gene
PF3D7_1229800	1283.28	0.582017	0.321755	5.68851	0.0581777	0.113898	myosin J, putative	protein_coding_gene
PF3D7_0501700	28.5227	0.580713	0.619726	1.44741	0.484953	0.573809	anaphase-promoting complex subunit 3, putative	protein_coding_gene
PF3D7_1217300	9162.06	0.579889	0.271878	6.79333	0.0334848	0.0749045	GTP-binding protein EngA	protein_coding_gene
PF3D7_1350500	8837.71	0.578681	0.279794	4.3388	0.114246	0.1903	conserved Plasmodium protein, unknown function	protein_coding_gene
PF3D7_1330500	3990.48	0.578145	0.197902	8.51342	0.0141688	0.0392953	CTLH domain-containing protein, putative	protein_coding_gene
PF3D7_1244000	4452.86	0.577562	0.250521	7.86241	0.01962	0.0503339	glucose inhibited division protein a homologue, putative	protein_coding_gene
PF3D7_0517900	2427.85	0.577285	0.278903	11.8021	0.00273658	0.0110939	zinc finger protein, putative	protein_coding_gene
PF3D7_1201700	440.855	0.576502	0.289685	4.70157	0.0952941	0.164977	conserved Plasmodium membrane protein, unknown function	protein_coding_gene
PF3D7_0108100	1607.11	0.575072	0.230262	10.9658	0.00415723	0.0150729	conserved protein, unknown function	protein_coding_gene
PF3D7_0106200	792.633	0.574959	0.209907	7.59703	0.022404	0.0553912	EF hand domain-containing protein, putative	protein_coding_gene
PF3D7_0602000	4008.72	0.574375	0.303409	12.6406	0.00179939	0.00800551	zinc finger protein, putative	protein_coding_gene
PF3D7_0522400	9022.96	0.57359	0.236385	45.716	1.18276e-10	1.91903e-08	conserved Plasmodium protein, unknown function	protein_coding_gene
PF3D7_1344200	25917.3	0.572516	0.267557	5.20591	0.0740545	0.136927	endoplasmic reticulum chaperone GRP170	protein_coding_gene
PF3D7_1214000	3403.28	0.572151	0.217846	7.01839	0.0299209	0.0687387	conserved protein, unknown function	protein_coding_gene
PF3D7_0728600	8328.41	0.572118	0.231104	26.2554	1.98931e-06	3.48936e-05	RING zinc finger protein, putative	protein_coding_gene
PF3D7_0525900	12.4697	0.571787	1.30124	1.49213	0.474229	NA	NIMA related kinase 2	protein_coding_gene
PF3D7_1125000	4210.28	0.571455	0.197076	15.8319	0.000364882	0.00224463	conserved protein, unknown function	protein_coding_gene
PF3D7_1143200	6742.37	0.571419	0.322426	9.99217	0.00676438	0.022203	DnaJ protein, putative	protein_coding_gene
PF3D7_0421400	0.837756	0.571023	3.97318	0.201869	0.903992	NA	Plasmodium RNA of unknown function RUF6	ncRNA_gene
PF3D7_1321500	9842.74	0.56867	0.196196	16.7144	0.000234705	0.00157237	3',5'-cyclic nucleotide phosphodiesterase beta	protein_coding_gene
PF3D7_0208100	17216.5	0.566844	0.211815	22.6112	1.23038e-05	0.000144202	conserved Plasmodium protein, unknown function	protein_coding_gene
PF3D7_1228300	13304.7	0.565255	0.233675	5.76061	0.0561176	0.110742	NIMA related kinase 1	protein_coding_gene
PF3D7_0703200	13390.3	0.564062	0.248465	10.1792	0.00616046	0.0205957	conserved Plasmodium protein, unknown function	protein_coding_gene
PF3D7_0933500	4537.84	0.563898	0.279426	8.28582	0.0158766	0.0427326	gamma-tubulin complex component, putative	protein_coding_gene
PF3D7_0811600	5835.34	0.563599	0.174589	10.4044	0.00550435	0.0188709	conserved protein, unknown function	protein_coding_gene
PF3D7_1329500	20186	0.561877	0.241218	6.36151	0.0415542	0.0884115	conserved protein, unknown function	protein_coding_gene
PF3D7_1428900	8634.03	0.561214	0.220183	16.2871	0.000290597	0.00187426	conserved Plasmodium protein, unknown function	protein_coding_gene
PF3D7_1243700	2051.21	0.560169	0.262384	7.78881	0.0203555	0.0514471	ubiquitin-conjugating enzyme E2, putative	protein_coding_gene
PF3D7_1032000	5608.48	0.559876	0.222082	8.88695	0.011755	0.0343649	ribosome maturation factor RimM, putative	protein_coding_gene
PF3D7_0515400	334.355	0.559453	0.308299	8.48222	0.0143916	0.0395559	conserved protein, unknown function	protein_coding_gene
PF3D7_1430700	5607.59	0.558214	0.225293	7.21564	0.0271109	0.0638655	NADP-specific glutamate dehydrogenase	protein_coding_gene
PF3D7_0818100	344.691	0.557714	0.382758	16.8273	0.000221813	0.00149955	zinc finger protein, putative	protein_coding_gene
PF3D7_0930000	164.606	0.557695	0.369761	3.07056	0.215395	0.308591	procollagen lysine 5-dioxygenase, putative	protein_coding_gene
PF3D7_1221800	6959.56	0.556713	0.212032	7.43506	0.0242939	0.0588861	conserved protein, unknown function	protein_coding_gene
PF3D7_1335000	59.3159	0.556506	0.665047	0.624775	0.731698	0.78866	MSP7-like protein	protein_coding_gene
PF3D7_1239200	29896.6	0.55649	0.247463	18.6534	8.90139e-05	0.000718756	AP2 domain transcription factor, putative	protein_coding_gene
PF3D7_0618000	837.932	0.556385	0.423458	4.16473	0.124635	0.202537	conserved Plasmodium membrane protein, unknown function	protein_coding_gene
PF3D7_1362600	718.651	0.553483	0.296911	4.21584	0.12149	0.199172	conserved protein, unknown function	protein_coding_gene
PF3D7_1412000	221.622	0.553457	1.26431	0.229591	0.891548	0.914084	p1/s1 nuclease, putative	protein_coding_gene
PF3D7_0625000	827.687	0.553067	0.311896	4.73996	0.0934827	0.162437	sphingomyelin synthase 1, putative	protein_coding_gene
PF3D7_1343100	11831.1	0.553057	0.225192	17.8431	0.000133479	0.000994295	conserved Plasmodium protein, unknown function	protein_coding_gene
PF3D7_0718300	61.4573	0.552406	0.516905	1.49651	0.473191	0.562327	cysteine repeat modular protein 2	protein_coding_gene
PF3D7_0731700	1422.67	0.551642	0.314228	3.06668	0.215814	0.308935	Plasmodium exported protein (hyp9), unknown function	protein_coding_gene
PF3D7_1248600	6492.5	0.550397	0.271803	3.99119	0.135932	0.216824	conserved Plasmodium protein, unknown function	protein_coding_gene
PF3D7_0108700	13522.2	0.550028	0.273549	8.18265	0.016717	0.0444418	secreted ookinete protein, putative	protein_coding_gene
PF3D7_1035400	5590.88	0.549552	0.326393	3.27566	0.194402	0.28609	merozoite surface protein 3	protein_coding_gene
PF3D7_1347100	6579.65	0.549233	0.190932	14.2002	0.000825012	0.00433549	DNA topoisomerase 3	protein_coding_gene
PF3D7_1416200	4934.01	0.548385	0.240479	21.7956	1.84985e-05	0.00020135	metacaspase-3	protein_coding_gene
PF3D7_0705300	7731.39	0.547778	0.214916	9.24921	0.00980752	0.0299181	origin recognition complex subunit 2	protein_coding_gene
PF3D7_0106900	3771.34	0.547771	0.183879	14.2231	0.000815627	0.00429483	2-C-methyl-D-erythritol 4-phosphate cytidylyltransferase, putative	protein_coding_gene
PF3D7_API04700	0.838345	0.545601	3.95614	0.487975	0.783498	NA	iron-sulfur cluster assembly protein SufB	protein_coding_gene
PF3D7_1131300	676.285	0.545514	0.270941	4.55601	0.102488	0.174752	conserved Plasmodium protein, unknown function	protein_coding_gene
PF3D7_1246300	3444.3	0.544412	0.181331	9.07665	0.0106913	0.0319753	protein KIC4	protein_coding_gene
PF3D7_1428500	1637.77	0.542957	0.200142	30.2286	2.72857e-07	7.36708e-06	protein kinase, putative	protein_coding_gene
PF3D7_1140200	18269.7	0.542764	0.265514	5.43053	0.0661876	0.125739	conserved Plasmodium protein, unknown function	protein_coding_gene
PF3D7_1136900	1099.47	0.541585	0.283462	5.05026	0.0800481	0.1451	subtilisin-like protease 2	protein_coding_gene
PF3D7_0826900	5653.57	0.541555	0.214778	17.3996	0.00016662	0.00120412	conserved Plasmodium protein, unknown function	protein_coding_gene
PF3D7_0607100	40.6793	0.541521	0.584767	3.29149	0.192868	0.2844	MYND-type zinc finger protein, putative	protein_coding_gene
PF3D7_1254400	1.5301	0.541148	3.8584	0.0682248	0.966463	NA	rifin	protein_coding_gene
PF3D7_1400900	0.842238	0.541054	3.95601	0.490843	0.782375	NA	Plasmodium exported protein (PHISTa), unknown function, pseudogene	pseudogene
PF3D7_0207900	4426.26	0.540766	0.269849	6.55008	0.0378153	0.082564	serine repeat antigen 2	protein_coding_gene
PF3D7_0310900	3731.17	0.540259	0.234408	6.18913	0.0452948	0.0942945	conserved Plasmodium protein, unknown function	protein_coding_gene
PF3D7_1133200	29926.7	0.539956	0.205845	30.4823	2.40353e-07	6.89454e-06	conserved Plasmodium protein, unknown function	protein_coding_gene
PF3D7_1223100	15086.5	0.538392	0.323322	8.48685	0.0143584	0.0395229	cAMP-dependent protein kinase regulatory subunit	protein_coding_gene
PF3D7_1437300	896.491	0.537715	0.30907	2.94766	0.229046	0.323506	conserved Plasmodium protein, unknown function	protein_coding_gene
PF3D7_0318500	1019.19	0.537698	0.240813	44.028	2.75075e-10	3.57047e-08	conserved Plasmodium protein, unknown function	protein_coding_gene
PF3D7_1111600	408.241	0.537501	0.269119	6.66787	0.0356526	0.0787695	endonuclease/exonuclease/phosphatase family protein, putative	protein_coding_gene
PF3D7_0611000	1007.97	0.537064	0.263531	4.1338	0.126578	0.204923	SNARE associated Golgi protein, putative	protein_coding_gene
PF3D7_1433100	3342.64	0.536812	0.323359	4.27455	0.117976	0.194949	HID1 domain-containing protein, putative	protein_coding_gene
PF3D7_0309900	3239.21	0.536686	0.243083	9.62118	0.00814307	0.025764	conserved Plasmodium protein, unknown function	protein_coding_gene
PF3D7_1025400	997.649	0.536076	0.190816	46.222	9.18365e-11	1.64419e-08	conserved Plasmodium membrane protein, unknown function	protein_coding_gene
PF3D7_0214100	34161.8	0.535589	0.213941	9.52784	0.00853208	0.0267489	protein transport protein SEC31	protein_coding_gene
PF3D7_1358600	199.375	0.535105	0.320173	4.31545	0.115588	0.191797	zinc finger protein, putative	protein_coding_gene
PF3D7_1368800	4993.47	0.534589	0.230501	34.4069	3.37781e-08	1.70268e-06	DNA repair endonuclease XPF, putative	protein_coding_gene
PF3D7_1014000	839.114	0.533926	0.20501	6.8804	0.0320583	0.072589	GDP-L-fucose synthase	protein_coding_gene
PF3D7_1435600	1894.8	0.533087	0.25885	28.5564	6.29584e-07	1.4528e-05	conserved Plasmodium protein, unknown function	protein_coding_gene
PF3D7_1129700	2461.04	0.532805	0.192571	11.5698	0.00307355	0.012126	conserved Plasmodium protein, unknown function	protein_coding_gene
PF3D7_1034600	3854.58	0.531912	0.221237	7.87141	0.0195319	0.0502028	translation initiation factor IF-3, putative	protein_coding_gene
PF3D7_0913700	12780.4	0.531825	0.24554	5.93547	0.0514195	0.10396	conserved protein, unknown function	protein_coding_gene
PF3D7_0910500	3858.01	0.531503	0.260248	12.34	0.0020912	0.00899651	DNA repair protein REV1, putative	protein_coding_gene
PF3D7_0514800	1966.43	0.530879	0.293762	4.00759	0.134823	0.215517	inositol polyphosphate multikinase, putative	protein_coding_gene
PF3D7_1211300	3773.79	0.529648	0.233376	22.2762	1.45473e-05	0.000164137	DNA helicase MCM8, putative	protein_coding_gene
PF3D7_1145600	1197.26	0.529365	0.19141	8.56585	0.0138022	0.0386105	TMEM65 domain-containing protein, putative	protein_coding_gene
PF3D7_0513700	216.809	0.529208	0.303673	3.58098	0.166878	0.255284	secreted ookinete protein, putative	protein_coding_gene
PF3D7_1020200	607.564	0.529194	0.276509	14.514	0.000705216	0.00385014	conserved Plasmodium protein, unknown function	protein_coding_gene
PF3D7_0704300	14598	0.527895	0.252997	30.1217	2.87842e-07	7.63649e-06	conserved Plasmodium membrane protein, unknown function	protein_coding_gene
PF3D7_1143100	1105	0.527142	0.25628	32.7722	7.64922e-08	3.05498e-06	AP2 domain transcription factor AP2-O	protein_coding_gene
PF3D7_1338900	15796	0.526884	0.17968	23.4703	8.00747e-06	0.000102149	serine/threonine protein kinase, putative	protein_coding_gene
PF3D7_0608100	13570.4	0.526648	0.221588	18.0154	0.000122464	0.000929579	conserved Plasmodium protein, unknown function	protein_coding_gene
PF3D7_0919500	366.903	0.525418	0.278233	9.72121	0.0077458	0.0248248	major facilitator superfamily domain-containing protein, putative	protein_coding_gene
PF3D7_1024400	387.565	0.525341	0.282609	12.649	0.00179188	0.0079858	conserved Plasmodium protein, unknown function	protein_coding_gene
PF3D7_0307800	7853.75	0.524478	0.259403	4.02168	0.133876	0.214466	PDZ domain-containing protein, putative	protein_coding_gene
PF3D7_0717200	4670.06	0.524348	0.223387	6.82265	0.0329974	0.0741976	conserved Plasmodium protein, unknown function	protein_coding_gene
PF3D7_0934100	8606.68	0.523939	0.281872	3.55953	0.168677	0.257353	TFIIH basal transcription factor complex helicase XPD subunit	protein_coding_gene
PF3D7_1429900	3176.34	0.523284	0.272088	12.3423	0.00208883	0.00899651	ADP-dependent DNA helicase RecQ	protein_coding_gene
PF3D7_1409600	4327.99	0.522768	0.257369	6.31443	0.042544	0.0898414	histidine phosphatase, putative	protein_coding_gene
PF3D7_1130300	0.564718	0.522189	3.98521	0.475015	0.788591	NA	small nucleolar RNA snoR13	ncRNA_gene
PF3D7_0828900	2504.84	0.521141	0.297832	5.75647	0.0562339	0.11093	conserved protein, unknown function	protein_coding_gene
PF3D7_0207100	7830.39	0.521125	0.274231	3.90245	0.1421	0.22408	conserved Plasmodium protein, unknown function	protein_coding_gene
PF3D7_API02300	11.3283	0.520921	0.985031	0.347717	0.840416	NA	apicoplast ribosomal protein S5	protein_coding_gene
PF3D7_0818000	6627.09	0.519774	0.235796	12.0607	0.00240471	0.010085	U4/U6.U5 small nuclear ribonucleoprotein, putative	protein_coding_gene
PF3D7_1113600	4955.68	0.519677	0.221234	6.17688	0.0455729	0.0947482	conserved Plasmodium protein, unknown function	protein_coding_gene
PF3D7_0731600	49057.4	0.519332	0.288423	3.35265	0.18706	0.277808	acyl-CoA synthetase	protein_coding_gene
PF3D7_0723300	3405.09	0.518069	0.214284	6.82945	0.0328854	0.0739862	conserved protein, unknown function	protein_coding_gene
PF3D7_0919900	9100.84	0.51765	0.224802	31.4612	1.47326e-07	5.12583e-06	regulator of chromosome condensation-PP1-interacting protein	protein_coding_gene
PF3D7_1239700	27105	0.515868	0.273965	4.09115	0.129306	0.208495	ATP-dependent zinc metalloprotease FTSH 1	protein_coding_gene
PF3D7_0105400	524.239	0.515648	0.422314	2.53178	0.281988	0.379787	conserved Plasmodium protein, unknown function	protein_coding_gene
PF3D7_0724500	177.586	0.513138	0.393025	3.27086	0.194869	0.286617	conserved Plasmodium protein, unknown function	protein_coding_gene
PF3D7_1025200	1090.12	0.51308	0.195037	10.0765	0.00648493	0.0215417	ATP synthase mitochondrial F1 complex assembly factor 2, putative	protein_coding_gene
PF3D7_0830200	299.7	0.511958	0.251559	29.1238	4.74064e-07	1.17767e-05	28S ribosomal RNA	ncRNA_gene
PF3D7_1146600	2887.75	0.511898	0.271939	8.98174	0.0112109	0.0331852	oocyst rupture protein 1, putative	protein_coding_gene
PF3D7_1119900	4487.38	0.511835	0.246954	18.472	9.74654e-05	0.000770229	protein transport protein SEC16, putative	protein_coding_gene
PF3D7_1359900	10446.8	0.510905	0.21829	17.51	0.000157671	0.00114815	conserved Plasmodium membrane protein, unknown function	protein_coding_gene
PF3D7_1318000	206.399	0.510682	0.762398	1.02568	0.598792	0.675266	conserved protein, unknown function	protein_coding_gene
PF3D7_0514100	6245.17	0.510206	0.244577	5.68995	0.0581356	0.113859	ATP-dependent DNA helicase UvrD	protein_coding_gene
PF3D7_0914100	4019.27	0.509514	0.211407	11.9512	0.00254001	0.0105051	conserved Plasmodium protein, unknown function	protein_coding_gene
PF3D7_1449400	7947.2	0.508713	0.199765	10.9659	0.00415699	0.0150729	crossover junction endonuclease MUS81, putative	protein_coding_gene
PF3D7_1105300	3569.25	0.50819	0.213074	5.66116	0.0589787	0.115163	conserved Plasmodium protein, unknown function	protein_coding_gene
PF3D7_0501800	20583.9	0.508187	0.190408	8.08448	0.0175581	0.0462017	chromatin assembly factor 1 subunit A	protein_coding_gene
PF3D7_0603800	5779.01	0.505962	0.209641	5.85819	0.0534454	0.106874	NdP2 protein, putative	protein_coding_gene
PF3D7_0616400	2740.36	0.50576	0.185145	27.3065	1.17618e-06	2.33081e-05	conserved Plasmodium protein, unknown function	protein_coding_gene
PF3D7_0306400	16243	0.505716	0.169262	15.9019	0.000352331	0.00217774	FAD-dependent glycerol-3-phosphate dehydrogenase, putative	protein_coding_gene
PF3D7_0818700	17383.5	0.505596	0.237072	5.48941	0.0642674	0.122901	DNA helicase, putative	protein_coding_gene
PF3D7_1348500	9001.75	0.504898	0.188904	13.4111	0.00122408	0.00596195	TBC domain protein, putative	protein_coding_gene
PF3D7_1474500	9352.35	0.504727	0.33815	2.29547	0.317355	0.416825	splicing factor 3A subunit 1, putative	protein_coding_gene
PF3D7_1254800	3.26162	0.504078	2.35616	0.569388	0.752245	NA	rifin	protein_coding_gene
PF3D7_1362900	1027.25	0.503526	0.197056	11.2453	0.00361506	0.0136405	conserved Plasmodium protein, unknown function	protein_coding_gene
PF3D7_1114900	1076.9	0.503148	0.298372	6.23388	0.0442925	0.0927271	filamin domain-containing protein, putative	protein_coding_gene
PF3D7_1431600	10074	0.503073	0.190355	16.4983	0.000261481	0.00172504	succinate--CoA ligase [ADP-forming] subunit beta	protein_coding_gene
PF3D7_1113500	3220.87	0.503002	0.251079	4.59459	0.100531	0.172136	GTP-binding protein, putative	protein_coding_gene
PF3D7_1422200	879.95	0.502938	0.194204	7.40352	0.0246801	0.0594336	conserved Plasmodium protein, unknown function	protein_coding_gene
PF3D7_1014300	13405.1	0.502777	0.239937	21.1029	2.61554e-05	0.000266273	SPRY domain-containing protein, putative	protein_coding_gene
PF3D7_0615300	5097.76	0.501883	0.231651	4.6827	0.0961977	0.16632	GPI-anchored wall transfer protein 1, putative	protein_coding_gene
PF3D7_0918500	134664	0.501723	0.226553	15.173	0.000507262	0.0029654	telomerase RNA	ncRNA_gene
PF3D7_0724800	4700.71	0.501001	0.228734	5.17296	0.0752846	0.138364	kelch domain-containing protein, putative	protein_coding_gene
PF3D7_1427200	1607	0.500865	0.291185	6.84344	0.0326562	0.0736219	selenoprotein	protein_coding_gene
PF3D7_0211900	7207.8	0.50051	0.207933	7.26361	0.0264684	0.0626809	pseudouridine synthase, putative	protein_coding_gene
PF3D7_1308900	14072.3	0.500414	0.332618	2.70422	0.258694	0.355704	mRNA-decapping enzyme 2, putative	protein_coding_gene
PF3D7_1353000	28523.9	0.499991	0.186622	31.2469	1.6399e-07	5.32149e-06	tryptophan-rich protein, pseudogene	pseudogene
PF3D7_1011600	918.438	0.499417	0.233586	9.2248	0.00992796	0.0301791	heptatricopeptide repeat-containing protein, putative	protein_coding_gene
PF3D7_0307300	19.9488	0.499347	0.770367	0.746956	0.688336	0.752071	microtubule-associated protein RP/EB family, putative	protein_coding_gene
PF3D7_0724000	2116.09	0.498846	0.235958	17.1408	0.000189633	0.00131804	Rab GTPase activator and protein kinase, putative	protein_coding_gene
PF3D7_1126100	4719.5	0.497965	0.296763	3.53293	0.170936	0.259678	autophagy-related protein 7, putative	protein_coding_gene
PF3D7_0609300	3554.48	0.497438	0.303926	5.80364	0.0549231	0.109173	conserved Plasmodium protein, unknown function	protein_coding_gene
PF3D7_0803600	7439.71	0.497067	0.214942	9.66215	0.00797792	0.0253877	conserved Plasmodium protein, unknown function	protein_coding_gene
PF3D7_0523800	4045.84	0.497033	0.225839	8.3499	0.015376	0.0416442	divalent metal transporter, putative	protein_coding_gene
PF3D7_0806900	1558.33	0.496456	0.229367	8.97914	0.0112255	0.0332095	conserved protein, unknown function	protein_coding_gene
PF3D7_0930100	3413.54	0.495986	0.253889	8.49314	0.0143132	0.0394584	heptatricopeptide repeat-containing protein, putative	protein_coding_gene
PF3D7_1364100	27083.7	0.495965	0.279849	14.8672	0.000591059	0.00333563	6-cysteine protein P92	protein_coding_gene
PF3D7_0918000	62202.3	0.495771	0.313858	8.07663	0.0176272	0.0463159	glideosome-associated protein 50	protein_coding_gene
PF3D7_0531100	1030.89	0.494633	0.210549	14.2261	0.000814389	0.00429483	conserved Plasmodium protein, unknown function	protein_coding_gene
PF3D7_0937400	2.62011	0.494256	2.09807	0.0869439	0.957459	NA	rifin	protein_coding_gene
PF3D7_1443900	22380.8	0.493919	0.294365	5.39126	0.0674998	0.127625	heat shock protein 90, putative	protein_coding_gene
PF3D7_1309700	1534.35	0.493805	0.253748	17.7397	0.000140567	0.00104112	vacuolar protein sorting-associated protein 18, putative	protein_coding_gene
PF3D7_1210700	2161.79	0.493055	0.21385	6.06973	0.0480811	0.0986708	conserved Plasmodium protein, unknown function	protein_coding_gene
PF3D7_0910900	8135.42	0.492628	0.175647	8.30751	0.0157053	0.0424256	DNA primase large subunit, putative	protein_coding_gene
PF3D7_1142300	10106.4	0.492525	0.252379	6.09246	0.0475379	0.097788	conserved Plasmodium membrane protein, unknown function	protein_coding_gene
PF3D7_1205300	2111.42	0.491867	0.206462	5.65311	0.0592165	0.11554	conserved Plasmodium protein, unknown function	protein_coding_gene
PF3D7_0307500	3863.5	0.491003	0.212136	5.35159	0.068852	0.129522	spindle and kinetochore-associated protein 2, putative	protein_coding_gene
PF3D7_1208400	2738.68	0.490531	0.178503	17.9487	0.000126613	0.000956638	amino acid transporter, putative	protein_coding_gene
PF3D7_1468600	536.582	0.49047	0.268681	13.3373	0.00127012	0.0061344	aminophospholipid transporter, putative	protein_coding_gene
PF3D7_1104500	35.269	0.489528	0.573916	0.768412	0.680991	0.746875	WD repeat-containing protein, putative	protein_coding_gene
PF3D7_1227200	19771.9	0.489415	0.27753	3.09145	0.213158	0.30623	potassium channel K1	protein_coding_gene
PF3D7_0307700	21209.5	0.488938	0.221693	10.5295	0.00517068	0.0179693	conserved Plasmodium protein, unknown function	protein_coding_gene
PF3D7_0805000	2652.84	0.488789	0.232282	8.72459	0.0127491	0.0362306	alpha/beta hydrolase, putative	protein_coding_gene
PF3D7_1022500	4979.04	0.488719	0.172781	7.96799	0.0186111	0.048366	citrate synthase, mitochondrial, putative	protein_coding_gene
PF3D7_1348600	387.045	0.487997	0.403711	2.0437	0.359928	0.457017	conserved Plasmodium protein, unknown function	protein_coding_gene
PF3D7_1352400	4681.26	0.486581	0.242138	11.5899	0.00304287	0.0120233	conserved Plasmodium protein, unknown function	protein_coding_gene
PF3D7_0616600	4969.51	0.486257	0.206555	5.9585	0.0508308	0.10293	conserved protein, unknown function	protein_coding_gene
PF3D7_1026300	8707.22	0.486224	0.232292	4.3595	0.11307	0.188886	conserved Plasmodium protein, unknown function	protein_coding_gene
PF3D7_1328200	5277.37	0.484818	0.234799	27.7955	9.2104e-07	1.92324e-05	conserved Plasmodium protein, unknown function	protein_coding_gene
PF3D7_0507600	7534.85	0.483502	0.237523	12.5341	0.00189778	0.00837766	protein CAF40, putative	protein_coding_gene
PF3D7_0704100	3371.51	0.482617	0.277197	23.1077	9.59883e-06	0.00011866	basal complex transmembrane protein 2	protein_coding_gene
PF3D7_1022200	5506.45	0.482426	0.288295	3.96025	0.138052	0.219329	conserved Plasmodium membrane protein, unknown function	protein_coding_gene
PF3D7_1314800	12.8295	0.481753	1.03861	1.12495	0.569797	0.649623	ubiquitin-like protein, putative	protein_coding_gene
PF3D7_1457800	533.434	0.481296	0.307371	4.7785	0.0916986	0.160519	conserved Plasmodium protein, unknown function	protein_coding_gene
PF3D7_1147800	2174.14	0.481235	0.22327	7.72374	0.0210287	0.0528209	membrane associated erythrocyte binding-like protein	protein_coding_gene
PF3D7_1340000	481.474	0.480657	0.360086	1.98238	0.371134	0.468497	secreted ookinete protein, putative	protein_coding_gene
PF3D7_1236400	4431.18	0.480546	0.204105	10.3748	0.0055866	0.0190826	conserved Plasmodium protein, unknown function	protein_coding_gene
PF3D7_0205800	2295.25	0.480492	0.204657	5.90213	0.0522841	0.105135	PH domain-containing protein, putative	protein_coding_gene
PF3D7_0111000	2443.33	0.480453	0.267708	12.6469	0.00179377	0.00798733	kinesin-8B, putative	protein_coding_gene
PF3D7_0528100	17956.1	0.48023	0.238054	9.92426	0.00699799	0.022794	AP-1/2 complex subunit beta, putative	protein_coding_gene
PF3D7_0909600	4912.64	0.479958	0.206094	6.24077	0.0441401	0.0925588	conserved protein, unknown function	protein_coding_gene
PF3D7_0216000	1165.95	0.479152	0.270855	22.7926	1.12372e-05	0.000135683	DEAD/DEAH box helicase, putative	protein_coding_gene
PF3D7_1112100	12681.1	0.479011	0.19877	33.0009	6.82269e-08	2.81138e-06	conserved Plasmodium protein, unknown function	protein_coding_gene
PF3D7_0920300	188.446	0.478867	0.334804	2.20313	0.33235	0.431195	conserved Plasmodium protein, unknown function	protein_coding_gene
PF3D7_1405000	3218.44	0.478608	0.192039	6.23742	0.0442143	0.0926394	conserved Plasmodium protein, unknown function	protein_coding_gene
PF3D7_1330100	2645.34	0.478363	0.232468	7.67557	0.0215413	0.0537025	conserved Plasmodium protein, unknown function	protein_coding_gene
PF3D7_1116500	7791.94	0.477953	0.177586	15.5714	0.000415631	0.00250175	folate transporter 2	protein_coding_gene
PF3D7_1106100	3121.05	0.477906	0.183653	12.6265	0.00181211	0.00805453	ribosomal protein S15, apicoplast, putative	protein_coding_gene
PF3D7_0530300	3269.32	0.477284	0.237745	24.7866	4.14636e-06	6.23997e-05	PhIL1-interacting candidate PIC6	protein_coding_gene
PF3D7_0514300	6896.21	0.47615	0.261695	7.02966	0.0297528	0.0684507	aspartate--tRNA ligase, putative	protein_coding_gene
PF3D7_1449600	307.656	0.475839	0.307851	3.16175	0.205795	0.298127	conserved protein, unknown function	protein_coding_gene
PF3D7_0518100	6371.78	0.475553	0.270432	4.16855	0.124397	0.202467	protein AMR2	protein_coding_gene
PF3D7_0806400	585.091	0.475461	0.264195	3.7489	0.153439	0.237879	UDP-N-acetylglucosamine transferase subunit ALG13, putative	protein_coding_gene
PF3D7_1236000	3783.83	0.474664	0.245735	5.94391	0.0512032	0.103604	vesicle transport v-SNARE protein VTI1, putative	protein_coding_gene
PF3D7_0419700	791.771	0.47441	0.221283	4.94743	0.0842713	0.150305	apical merozoite protein	protein_coding_gene
PF3D7_1411400	8371.8	0.474124	0.231028	20.8277	3.00142e-05	0.000297961	plastid replication-repair enzyme	protein_coding_gene
PF3D7_1329200	1782.05	0.474113	0.226918	4.68153	0.0962539	0.166362	conserved Plasmodium protein, unknown function	protein_coding_gene
PF3D7_0303400	2546.1	0.473416	0.311034	7.01298	0.030002	0.068864	palmitoyltransferase DHHC1	protein_coding_gene
PF3D7_1136000	5157.36	0.473331	0.250755	32.0072	1.12129e-07	4.1289e-06	conserved Plasmodium protein, unknown function	protein_coding_gene
PF3D7_0602400	14861.9	0.472592	0.284693	2.85795	0.239554	0.334435	elongation factor G	protein_coding_gene
PF3D7_0604300	7298.57	0.471487	0.293345	2.7257	0.255931	0.352558	conserved Plasmodium protein, unknown function	protein_coding_gene
PF3D7_0315600	940.406	0.471298	0.33812	4.07353	0.13045	0.21008	zinc finger protein, putative	protein_coding_gene
PF3D7_0504400	16157.5	0.471182	0.205474	12.4922	0.00193801	0.00849846	ATP-dependent helicase, putative	protein_coding_gene
PF3D7_1207500	2181.27	0.471017	0.186512	6.7744	0.0338032	0.075454	RNA-binding protein, putative	protein_coding_gene
PF3D7_0505700	12659.8	0.470537	0.189488	13.0794	0.00144494	0.00678924	conserved Plasmodium membrane protein, unknown function	protein_coding_gene
PF3D7_1402800	12231.8	0.470268	0.227065	26.4995	1.76075e-06	3.2201e-05	conserved Plasmodium protein, unknown function	protein_coding_gene
PF3D7_0423000	1027.58	0.469852	0.225221	4.55697	0.102439	0.174726	conserved Plasmodium protein, unknown function	protein_coding_gene
PF3D7_0413500	10086.6	0.469805	0.261421	11.989	0.00249242	0.010348	phosphoglucomutase-2	protein_coding_gene
PF3D7_1430400	2826.69	0.469629	0.341677	2.01507	0.365118	0.462252	autophagy protein 5, putative	protein_coding_gene
PF3D7_0924900	27.652	0.469356	0.610603	0.868861	0.647633	0.718485	alpha-tubulin N-acetyltransferase, putative	protein_coding_gene
PF3D7_1433800	6204.74	0.468707	0.184279	34.1691	3.80426e-08	1.8992e-06	conserved Plasmodium protein, unknown function	protein_coding_gene
PF3D7_1341500	257.512	0.467499	0.27256	3.08148	0.214222	0.307345	inner membrane complex suture component, putative	protein_coding_gene
PF3D7_0723900	7963.47	0.467006	0.301854	3.00047	0.223077	0.316857	RNA-binding protein, putative	protein_coding_gene
PF3D7_0202800	1523	0.466973	0.2022	5.32803	0.0696681	0.13082	conserved Plasmodium protein, unknown function	protein_coding_gene
PF3D7_1134900	112.096	0.466921	0.347701	3.72463	0.155313	0.240268	conserved Plasmodium protein, unknown function	protein_coding_gene
PF3D7_0211500	2422.75	0.466843	0.197902	26.987	1.37987e-06	2.63776e-05	GAF domain-related protein, putative	protein_coding_gene
PF3D7_0908000	4843.39	0.466803	0.214319	13.6993	0.00105983	0.00535795	plasma membrane protein 1, putative	protein_coding_gene
PF3D7_1472500	152.186	0.466662	0.350997	2.26684	0.321931	0.420706	conserved Plasmodium protein, unknown function	protein_coding_gene
PF3D7_0725600	86656.2	0.466536	0.4525	4.42655	0.109342	0.183884	18S ribosomal RNA	ncRNA_gene
PF3D7_1350400	1712.65	0.46647	0.245891	12.0204	0.00245354	0.0102238	ubiquitin-activating enzyme E1, putative	protein_coding_gene
PF3D7_1221700	2550.31	0.466358	0.311243	6.01885	0.0493201	0.100617	FbpA domain protein, putative	protein_coding_gene
PF3D7_0603400	11724.1	0.466259	0.238122	19.7921	5.03732e-05	0.000454848	trophozoite exported protein 1	protein_coding_gene
PF3D7_1441300	1294.14	0.466076	0.239816	11.7157	0.0028574	0.0114733	serine/threonine protein kinase, putative	protein_coding_gene
PF3D7_0613700	12411.6	0.464353	0.186169	10.7713	0.00458178	0.016249	syntaxin-binding protein, putative	protein_coding_gene
PF3D7_0405400	76290.2	0.464036	0.273914	3.99359	0.13577	0.21663	pre-mRNA-processing-splicing factor 8, putative	protein_coding_gene
PF3D7_1440700	5176.03	0.463947	0.27843	4.94401	0.0844155	0.150458	AP-3 complex subunit mu, putative	protein_coding_gene
PF3D7_0323200	3222.33	0.462163	0.221985	4.34333	0.113988	0.18993	conserved Plasmodium protein, unknown function	protein_coding_gene
PF3D7_0304800	1799.32	0.46183	0.262635	17.1156	0.000192038	0.00133119	conserved Plasmodium membrane protein, unknown function	protein_coding_gene
PF3D7_1037200	118.493	0.46136	0.38465	1.53165	0.464951	0.555715	conserved Plasmodium protein, unknown function	protein_coding_gene
PF3D7_0311300	19739.3	0.461341	0.169418	16.0383	0.0003291	0.00206115	phosphatidylinositol 3- and 4-kinase, putative	protein_coding_gene
PF3D7_1203400	6354.85	0.461279	0.245881	21.4714	2.17538e-05	0.000229099	major facilitator superfamily domain-containing protein, putative	protein_coding_gene
PF3D7_1234700	210.967	0.460813	0.315756	2.2708	0.321294	0.420085	upregulated in late gametocytes ULG8	protein_coding_gene
PF3D7_0524600	3953.7	0.460564	0.168832	10.426	0.00544537	0.0187856	50S ribosomal protein L12, apicoplast, putative	protein_coding_gene
PF3D7_0612000	2616.45	0.459861	0.293874	2.91944	0.232302	0.326948	conserved Plasmodium protein, unknown function	protein_coding_gene
PF3D7_0316400	16170.7	0.459837	0.307421	2.74699	0.25322	0.349288	CS domain-containing protein, putative	protein_coding_gene
PF3D7_0505300	329.11	0.459247	0.257873	3.97947	0.136732	0.217698	UDP-N-acetylglucosamine transporter, putative	protein_coding_gene
PF3D7_1232700	2051.6	0.45897	0.206137	7.93247	0.0189446	0.0490087	Nd9 protein	protein_coding_gene
PF3D7_1322000	14158.2	0.458634	0.178889	11.8799	0.00263212	0.0107776	nucleoside-diphosphatase, putative	protein_coding_gene
PF3D7_0814400	1118.76	0.458556	0.283908	3.0595	0.21659	0.309789	phospholipase DDHD1, putative	protein_coding_gene
PF3D7_0419300	3861.97	0.458463	0.231017	4.46692	0.107157	0.180812	conserved Plasmodium protein, unknown function	protein_coding_gene
PF3D7_0915000	8311.53	0.458293	0.181009	12.0277	0.00244472	0.0102238	type II NADH:ubiquinone oxidoreductase	protein_coding_gene
PF3D7_1145500	5214.67	0.458139	0.249627	4.10227	0.128589	0.207726	ABC transporter B family member 3, putative	protein_coding_gene
PF3D7_1469900	1180.43	0.457681	0.260258	8.59743	0.013586	0.0381084	protein MGET	protein_coding_gene
PF3D7_0922900	906.266	0.457388	0.25512	4.27585	0.117899	0.194885	3-oxoacyl-[acyl-carrier-protein] reductase	protein_coding_gene
PF3D7_1440000	3298.79	0.457186	0.22976	18.8518	8.06105e-05	0.00066328	conserved Plasmodium protein, unknown function	protein_coding_gene
PF3D7_0310100	246.739	0.457179	0.37031	14.6256	0.000666947	0.00369074	calcium-dependent protein kinase 3	protein_coding_gene
PF3D7_0305800	153.081	0.457098	0.416829	3.06191	0.216329	0.309502	P-loop containing nucleoside triphosphate hydrolase, putative	protein_coding_gene
PF3D7_0517400	39756.2	0.456743	0.284583	3.09519	0.212759	0.305827	FACT complex subunit SPT16, putative	protein_coding_gene
PF3D7_0406900	568.745	0.455887	0.32674	10.0435	0.00659303	0.021831	conserved Plasmodium protein, unknown function	protein_coding_gene
PF3D7_0403800	1587.08	0.455664	0.181833	6.94362	0.0310608	0.0706394	alpha/beta hydrolase, putative	protein_coding_gene
PF3D7_1323000	1199.52	0.455566	0.263607	7.09556	0.0287885	0.0670569	beta-hydroxyacyl-ACP dehydratase	protein_coding_gene
PF3D7_0826200	587.794	0.45541	0.240296	4.24857	0.119518	0.196746	alpha/beta hydrolase, putative	protein_coding_gene
PF3D7_0907400	18684.1	0.455403	0.268777	2.90798	0.233636	0.328202	ATP-dependent protease ATPase subunit ClpY	protein_coding_gene
PF3D7_0318200	53031.3	0.45474	0.29858	2.64692	0.266213	0.363158	DNA-directed RNA polymerase II subunit RPB1	protein_coding_gene
PF3D7_1307700	6531.44	0.454643	0.274113	2.73114	0.255235	0.351787	TOM1-like protein, putative	protein_coding_gene
PF3D7_1036800	4527.23	0.454149	0.208993	5.63718	0.0596902	0.116205	acetyl-CoA transporter, putative	protein_coding_gene
PF3D7_1205500	9797.08	0.453036	0.206335	25.2104	3.35451e-06	5.32618e-05	zinc finger protein, putative	protein_coding_gene
PF3D7_0606700	16733.2	0.45188	0.292422	4.81535	0.0900244	0.158228	coatomer alpha subunit, putative	protein_coding_gene
PF3D7_0711000	32653.6	0.451734	0.291308	4.93689	0.0847167	0.150788	AAA family ATPase, CDC48 subfamily	protein_coding_gene
PF3D7_0721500	937.624	0.451507	0.273124	4.31654	0.115525	0.191797	conserved Plasmodium membrane protein, unknown function	protein_coding_gene
PF3D7_1124000	5100.53	0.451088	0.168571	12.6718	0.00177151	0.00792219	endoplasmic reticulum oxidoreductin, putative	protein_coding_gene
PF3D7_1305000	13090	0.451009	0.293044	2.42369	0.297648	0.396472	MCL1 domain-containing protein, putative	protein_coding_gene
PF3D7_1203300	4596.05	0.450968	0.20366	4.97394	0.0831617	0.149042	TBCC domain-containing protein, putative	protein_coding_gene
PF3D7_1119700	459.305	0.450504	0.233603	19.8995	4.77392e-05	0.00043561	conserved Plasmodium protein, unknown function	protein_coding_gene
PF3D7_0414400	19.921	0.45035	0.727719	0.428421	0.807178	0.846983	conserved Plasmodium protein, unknown function	protein_coding_gene
PF3D7_0827600	11993.2	0.450332	0.210945	19.4032	6.11866e-05	0.000526834	conserved Plasmodium protein, unknown function	protein_coding_gene
PF3D7_1441100	86006.7	0.449589	0.231732	3.85153	0.145764	0.228299	conserved Plasmodium protein, unknown function	protein_coding_gene
PF3D7_0725100	6882.18	0.449163	0.234863	17.9863	0.000124261	0.000940471	conserved Plasmodium membrane protein, unknown function	protein_coding_gene
PF3D7_1209300	8963.25	0.448998	0.198399	16.3869	0.000276459	0.00180551	telomere repeat-binding zinc finger protein	protein_coding_gene
PF3D7_0717800	1804.19	0.448968	0.297697	5.48567	0.0643875	0.122987	conserved Plasmodium protein, unknown function	protein_coding_gene
PF3D7_0306500	6418.54	0.448523	0.167913	14.8443	0.000597872	0.00335947	cytochrome c oxidase subunit 6c, putative	protein_coding_gene
PF3D7_0312100	7346.99	0.448064	0.177124	11.3644	0.003406	0.0130413	E3 ubiquitin-protein ligase	protein_coding_gene
PF3D7_0817700	6856.15	0.447912	0.485743	2.6756	0.262422	0.359024	rhoptry neck protein 5	protein_coding_gene
PF3D7_0918600	4390.84	0.446823	0.30069	5.17631	0.0751585	0.138328	ATP-dependent DNA helicase Q1	protein_coding_gene
PF3D7_0417800	9500.26	0.446284	0.242765	10.7595	0.00460891	0.0163118	cdc2-related protein kinase 1	protein_coding_gene
PF3D7_0509900	866.04	0.446278	0.209959	5.27041	0.0717044	0.133821	NSE4 domain-containing protein, putative	protein_coding_gene
PF3D7_1245500	2324.51	0.445879	0.238307	4.44002	0.108608	0.182963	conserved Plasmodium protein, unknown function	protein_coding_gene
PF3D7_1357200	4160.71	0.445254	0.226802	4.33481	0.114474	0.190558	glutamate--tRNA ligase	protein_coding_gene
PF3D7_0927600	12682.7	0.445067	0.193351	5.32429	0.0697983	0.131017	RNA-binding protein, putative	protein_coding_gene
PF3D7_0608600	2150.15	0.444303	0.206675	4.60021	0.100249	0.171779	conserved Plasmodium protein, unknown function	protein_coding_gene
PF3D7_0105300	4608.14	0.443415	0.318171	6.62969	0.0363397	0.0798796	cyclase-associated protein	protein_coding_gene
PF3D7_0509800	17024.2	0.443028	0.286347	4.98759	0.0825961	0.148509	phosphatidylinositol 4-kinase beta	protein_coding_gene
PF3D7_1141300	7240.7	0.4423	0.189447	21.5341	2.10829e-05	0.000224309	apical polar ring protein APR1, putative	protein_coding_gene
PF3D7_1249900	10667.6	0.441576	0.268615	7.2423	0.0267519	0.0632207	ribosomal RNA small subunit methyltransferase A2, putative	protein_coding_gene
PF3D7_0323400	866.466	0.441322	0.290278	14.8706	0.000590053	0.00333358	Rh5 interacting protein	protein_coding_gene
PF3D7_0217500	6167.07	0.440984	0.478455	3.53754	0.170543	0.259513	calcium-dependent protein kinase 1	protein_coding_gene
PF3D7_0908100	853.585	0.440967	0.240039	6.33323	0.0421461	0.0892789	apicoplast integral membrane protein, putative	protein_coding_gene
PF3D7_0614300	70970.1	0.440907	0.208824	14.271	0.000796322	0.00421888	major facilitator superfamily-related transporter, putative	protein_coding_gene
PF3D7_1468000	1492.21	0.44087	0.266838	16.9219	0.000211574	0.00144538	conserved Plasmodium protein, unknown function	protein_coding_gene
PF3D7_0110600	23189.2	0.440677	0.282898	2.84633	0.24095	0.335556	phosphatidylinositol-4-phosphate 5-kinase	protein_coding_gene
PF3D7_0929100	5150.09	0.43975	0.168574	7.58761	0.0225098	0.055547	conserved protein, unknown function	protein_coding_gene
PF3D7_0410300	7866.79	0.439176	0.196825	6.46857	0.0393884	0.0849497	protein phosphatase PPM1, putative	protein_coding_gene
PF3D7_0526700	5250.32	0.439168	0.208386	14.4666	0.000722128	0.00392185	conserved protein, unknown function	protein_coding_gene
PF3D7_1331600	6850.71	0.438763	0.293753	6.36246	0.0415346	0.0884115	3-hydroxyacyl-CoA dehydratase DEH	protein_coding_gene
PF3D7_0728200	740.522	0.438482	0.240353	4.40377	0.110595	0.185408	actin-like protein, putative	protein_coding_gene
PF3D7_1304000	6653.47	0.437077	0.215341	4.19186	0.122956	0.200877	condensin complex subunit 2, putative	protein_coding_gene
PF3D7_1406600	8486.61	0.436913	0.247353	15.706	0.000388593	0.00236527	ATP-dependent Clp protease regulatory subunit ClpC	protein_coding_gene
PF3D7_1031300	4343.77	0.436884	0.229641	35.7839	1.69674e-08	1.00107e-06	SAE2 domain-containing protein, putative	protein_coding_gene
PF3D7_0625300	9848.89	0.436005	0.23648	26.3964	1.85397e-06	3.33645e-05	mitochondrial DNA polymerase	protein_coding_gene
PF3D7_1306200	8731.73	0.435027	0.184311	15.3702	0.000459617	0.00272102	conserved protein, unknown function	protein_coding_gene
PF3D7_1021800	13472.5	0.433927	0.246998	30.3973	2.50794e-07	7.07677e-06	schizont egress antigen-1	protein_coding_gene
PF3D7_1322500	5697.67	0.432896	0.172022	7.55635	0.0228643	0.0561019	palmitoyltransferase DHHC5	protein_coding_gene
PF3D7_1433500	20032.8	0.43196	0.21427	4.03439	0.133028	0.213437	DNA topoisomerase 2	protein_coding_gene
PF3D7_0506700	7790.19	0.431461	0.213874	4.18131	0.123606	0.201496	GTPase-activating protein, putative	protein_coding_gene
PF3D7_0628500	995.213	0.431252	0.279863	2.47304	0.290394	0.388488	conserved Plasmodium protein, unknown function	protein_coding_gene
PF3D7_1316600	15556.5	0.431005	0.27724	4.57647	0.101446	0.173466	choline-phosphate cytidylyltransferase	protein_coding_gene
PF3D7_1031600	14717.8	0.430172	0.266702	8.57559	0.0137352	0.0384645	protein GEXP15	protein_coding_gene
PF3D7_0313900	38.2201	0.429272	0.656328	4.05241	0.131835	0.211784	conserved Plasmodium protein, unknown function	protein_coding_gene
PF3D7_0623700	4363.33	0.429149	0.256933	3.16465	0.205497	0.297779	ATP-dependent RNA helicase SUV3, putative	protein_coding_gene
PF3D7_0614900	4965.56	0.428788	0.197871	23.2397	8.98582e-06	0.000112692	conserved Plasmodium membrane protein, unknown function	protein_coding_gene
PF3D7_1404400	2632.78	0.428479	0.235638	3.47217	0.176209	0.265413	ribosomal protein L16, mitochondrial, putative	protein_coding_gene
PF3D7_0107000	11053	0.427215	0.181648	5.72319	0.0571775	0.112407	centrin-1	protein_coding_gene
PF3D7_0607400	5991.41	0.426764	0.215101	6.81928	0.0330531	0.0742096	G-protein associated signal transduction protein, putative	protein_coding_gene
PF3D7_0614100	1366.25	0.426565	0.217856	24.2896	5.31581e-06	7.43927e-05	filamin domain-containing protein, putative	protein_coding_gene
PF3D7_1341800	377.468	0.426089	0.312004	1.89381	0.387939	0.484411	inner membrane complex protein 1k, putative	protein_coding_gene
PF3D7_0316900	8691.21	0.425277	0.226608	4.74233	0.0933717	0.162384	E3 ubiquitin-protein ligase, putative	protein_coding_gene
PF3D7_1444200	301.659	0.425146	0.320168	3.42985	0.179977	0.269602	EF-hand calcium-binding domain-containing protein, putative	protein_coding_gene
PF3D7_1440400	397.391	0.424717	0.34647	8.93665	0.0114665	0.0337113	zinc finger protein, putative	protein_coding_gene
PF3D7_0314900	2462.16	0.424547	0.23471	5.91393	0.0519763	0.104774	conserved Plasmodium membrane protein, unknown function	protein_coding_gene
PF3D7_0902800	17257.4	0.424146	0.248486	14.9749	0.000560078	0.00319904	serine repeat antigen 9	protein_coding_gene
PF3D7_1470400	1784.15	0.422731	0.251132	3.01529	0.22143	0.314891	mitochondrial pyruvate carrier protein 2, putative	protein_coding_gene
PF3D7_0727800	14205.8	0.422321	0.307653	3.20465	0.201427	0.293326	cation transporting ATPase, putative	protein_coding_gene
PF3D7_0904900	25830	0.422268	0.247922	21.9087	1.74816e-05	0.000192706	copper-transporting ATPase	protein_coding_gene
PF3D7_0404300	18062.3	0.421379	0.251198	8.75569	0.0125524	0.0358914	conserved Plasmodium protein, unknown function	protein_coding_gene
PF3D7_1333900	3319.16	0.421204	0.221446	14.9403	0.000569849	0.00324059	conserved Plasmodium protein, unknown function	protein_coding_gene
PF3D7_0924600	1704.29	0.420324	0.204776	13.3463	0.00126438	0.00611806	conserved Plasmodium protein, unknown function	protein_coding_gene
PF3D7_0905100	10793	0.419825	0.293466	1.99978	0.36792	0.46504	nucleoporin NUP221, putative	protein_coding_gene
PF3D7_1468100	66636.7	0.419779	0.227443	16.9407	0.000209592	0.00143373	MORC family protein	protein_coding_gene
PF3D7_1343400	4350.95	0.419767	0.261879	2.57574	0.275858	0.37329	DNA repair protein RAD5, putative	protein_coding_gene
PF3D7_0809700	451.661	0.419673	0.221201	5.6381	0.0596626	0.116205	RuvB-like helicase 1	protein_coding_gene
PF3D7_0410900	4570.71	0.418932	0.279485	7.87147	0.0195314	0.0502028	conserved Plasmodium protein, unknown function	protein_coding_gene
PF3D7_1324600	3947.38	0.418092	0.229153	16.0831	0.000321814	0.0020302	conserved Plasmodium protein, unknown function	protein_coding_gene
PF3D7_0707800	8168.12	0.418041	0.181914	13.0323	0.00147933	0.00690086	RAP protein, putative	protein_coding_gene
PF3D7_0520800	15236.9	0.417757	0.214559	19.5637	5.64666e-05	0.000496906	conserved protein, unknown function	protein_coding_gene
PF3D7_0105900	3190.09	0.417419	0.218764	6.95605	0.0308683	0.0703954	3'-5' exonuclease, putative	protein_coding_gene
PF3D7_1005000	2493.55	0.417263	0.279865	3.01632	0.221317	0.314816	methionine--tRNA ligase, putative	protein_coding_gene
PF3D7_1345400	16120	0.416533	0.220673	17.1665	0.000187211	0.00130645	conserved Plasmodium protein, unknown function	protein_coding_gene
PF3D7_1016000	437.149	0.416446	0.283447	11.5414	0.00311759	0.012253	conserved Plasmodium protein, unknown function	protein_coding_gene
PF3D7_0804400	6379.54	0.41638	0.248204	8.86841	0.0118645	0.0345328	methionine aminopeptidase 1c, putative	protein_coding_gene
PF3D7_0416500	1575	0.41613	0.188399	8.84495	0.0120045	0.0348197	repressor of RNA polymerase III transcription MAF1	protein_coding_gene
PF3D7_1031800	4362.11	0.415901	0.250962	10.5767	0.00505006	0.0176209	conserved protein, unknown function	protein_coding_gene
PF3D7_0416000	12870.5	0.414688	0.193271	4.93065	0.084981	0.151155	RNA-binding protein, putative	protein_coding_gene
PF3D7_0610000	5021.46	0.414097	0.190253	7.04605	0.02951	0.0681255	ribosomal protein L19, mitochondrial, putative	protein_coding_gene
PF3D7_1448300	11455.2	0.413399	0.250067	27.2327	1.22037e-06	2.38494e-05	conserved protein, unknown function	protein_coding_gene
PF3D7_1412800	13553.9	0.412765	0.200902	12.1966	0.00224665	0.00951436	glycylpeptide N-tetradecanoyltransferase	protein_coding_gene
PF3D7_0905900	6535.68	0.412683	0.274992	2.51341	0.28459	0.382696	coatomer subunit beta, putative	protein_coding_gene
PF3D7_1031500	10542	0.412094	0.187766	5.17333	0.0752705	0.138364	ATP-dependent DNA helicase DDX3X	protein_coding_gene
PF3D7_1367500	5822.9	0.411904	0.184275	5.91349	0.0519879	0.104774	NADH-cytochrome b5 reductase, putative	protein_coding_gene
PF3D7_0831200	6672.5	0.411548	0.223379	3.38486	0.184072	0.273997	DnaJ protein, putative	protein_coding_gene
PF3D7_1245700	11.8766	0.411506	1.22226	0.479498	0.786825	NA	non-coding RNA	ncRNA_gene
PF3D7_1336100	739.391	0.41143	0.249617	5.7842	0.0554597	0.109832	WPP motif-containing protein, putative	protein_coding_gene
PF3D7_1306700	1636.68	0.4114	0.188401	4.93746	0.0846924	0.150788	conserved Plasmodium protein, unknown function	protein_coding_gene
PF3D7_1412200	1724.53	0.411327	0.328613	1.85525	0.395492	0.491478	conserved Plasmodium protein, unknown function	protein_coding_gene
PF3D7_1040800	0.418662	0.411224	4.01162	0.638438	0.726716	NA	rifin	protein_coding_gene
PF3D7_1244200	7947.68	0.410898	0.294031	3.92508	0.140501	0.222335	RNA polymerase II transcription factor B subunit 2, putative	protein_coding_gene
PF3D7_0316200	7582.24	0.410642	0.197846	29.1634	4.64787e-07	1.16578e-05	conserved Plasmodium protein, unknown function	protein_coding_gene
PF3D7_1308800	14755.4	0.410501	0.195864	9.45418	0.00885221	0.0275544	tyrosine recombinase	protein_coding_gene
PF3D7_1308700	5590.96	0.410302	0.223583	20.7859	3.06482e-05	0.000301374	conserved Plasmodium protein, unknown function	protein_coding_gene
PF3D7_1320700	3223.11	0.409676	0.17878	19.8238	4.95805e-05	0.000449253	conserved protein, unknown function	protein_coding_gene
PF3D7_1406400	2506.6	0.409495	0.219196	3.60023	0.16528	0.252988	pentatricopeptide repeat-containing protein 1	protein_coding_gene
PF3D7_1129600	693.4	0.409239	0.301196	4.23511	0.120326	0.197765	phosphatidylinositol-4-phosphate 5-kinase, putative	protein_coding_gene
PF3D7_1314200	5887.17	0.408992	0.234842	26.5399	1.7256e-06	3.18837e-05	telomerase reverse transcriptase	protein_coding_gene
PF3D7_0805300	683.655	0.408861	0.315955	14.3305	0.000772973	0.00411618	zinc finger protein, putative	protein_coding_gene
PF3D7_0409000	629.347	0.408081	0.216053	25.2509	3.28726e-06	5.23541e-05	conserved Plasmodium protein, unknown function	protein_coding_gene
PF3D7_1317100	43985.9	0.407446	0.229872	7.10209	0.0286946	0.0669282	DNA replication licensing factor MCM4	protein_coding_gene
PF3D7_0515300	12330.3	0.407438	0.218917	16.3404	0.000282963	0.00184334	phosphatidylinositol 3-kinase	protein_coding_gene
PF3D7_0408500	11448.5	0.407255	0.174145	12.261	0.00217552	0.00927451	flap endonuclease 1	protein_coding_gene
PF3D7_0311100	10669	0.407221	0.226865	3.21559	0.200328	0.292102	pre-mRNA splicing factor, putative	protein_coding_gene
PF3D7_0909400	12431.2	0.407216	0.280638	5.15544	0.0759469	0.139334	exoribonuclease, putative	protein_coding_gene
PF3D7_0311200	4874.57	0.407191	0.32196	2.8411	0.241582	0.336091	valine--tRNA ligase, putative	protein_coding_gene
PF3D7_0216500	1263.05	0.407176	0.213975	25.2887	3.2258e-06	5.16924e-05	conserved Plasmodium protein, unknown function	protein_coding_gene
PF3D7_1139700	2993.56	0.406616	0.182524	7.51153	0.0233825	0.0572111	adrenodoxin reductase, putative	protein_coding_gene
PF3D7_1235000	415.164	0.406302	0.246673	2.69256	0.260207	0.356839	PIH1 domain-containing protein, putative	protein_coding_gene
PF3D7_1448400	13678.5	0.405734	0.228632	5.34273	0.0691576	0.130002	ubiquitin-protein ligase, putative	protein_coding_gene
PF3D7_0514700	56.3702	0.405729	0.748129	1.49387	0.473816	0.562684	MORN repeat protein, putative	protein_coding_gene
PF3D7_0203600	558.758	0.405125	0.213812	6.09056	0.047583	0.0978032	conserved Plasmodium protein, unknown function	protein_coding_gene
PF3D7_1470500	2245.49	0.405112	0.20565	4.13158	0.126718	0.20496	cGMP-specific 3',5'-cyclic phosphodiesterase delta	protein_coding_gene
PF3D7_1146700	3.95402	0.405057	1.97306	0.570272	0.751912	NA	kinesin-X4, putative	protein_coding_gene
PF3D7_1312400	2275.58	0.405016	0.315873	3.18679	0.203234	0.295489	translation initiation factor IF-2, putative	protein_coding_gene
PF3D7_1457900	14090	0.404815	0.185053	27.7038	9.64243e-07	1.99456e-05	conserved Plasmodium protein, unknown function	protein_coding_gene
PF3D7_1008200	541.632	0.404426	0.224367	3.36638	0.18578	0.276381	flap endonuclease, putative	protein_coding_gene
PF3D7_1340400	20.4882	0.404383	0.776252	1.12559	0.569616	0.649623	conserved Plasmodium protein, unknown function	protein_coding_gene
PF3D7_0209900	619.202	0.403055	0.285945	2.06425	0.356249	0.453789	non-coding RNA	ncRNA_gene
PF3D7_0717500	8340.79	0.402847	0.165262	10.8296	0.0044503	0.0159351	calcium-dependent protein kinase 4	protein_coding_gene
PF3D7_1347600	304.061	0.402828	0.329219	1.50618	0.47091	0.561029	conserved protein, unknown function	protein_coding_gene
PF3D7_0403100	3031.1	0.402262	0.20964	3.75652	0.152856	0.237187	regulator of chromosome condensation, putative	protein_coding_gene
PF3D7_1137100	5066.41	0.402247	0.29837	1.89008	0.388665	0.484904	ribosomal protein S9, mitochondrial, putative	protein_coding_gene
PF3D7_1249400	3839.98	0.402011	0.176694	5.3176	0.0700323	0.131361	conserved Plasmodium protein, unknown function	protein_coding_gene
PF3D7_1004200	14532.3	0.401988	0.254351	18.7742	8.37992e-05	0.000685876	WD repeat-containing protein, putative	protein_coding_gene
PF3D7_1401800	11450.9	0.401964	0.247624	8.22889	0.016335	0.0436723	choline kinase	protein_coding_gene
PF3D7_0205600	4113.14	0.401882	0.201184	7.58089	0.0225855	0.0556018	conserved Plasmodium protein, unknown function	protein_coding_gene
PF3D7_0611100	1029.24	0.401197	0.191689	7.14858	0.0280353	0.0657154	succinate dehydrogenase subunit 3, putative	protein_coding_gene
PF3D7_0928100	268.945	0.401047	0.467111	3.55863	0.168753	0.257394	conserved Plasmodium protein, unknown function	protein_coding_gene
PF3D7_1142400	10432.6	0.400722	0.293884	2.90167	0.234374	0.328707	coproporphyrinogen-III oxidase	protein_coding_gene
PF3D7_0217000	429.778	0.400529	0.292653	24.8517	4.01351e-06	6.1109e-05	conserved Plasmodium membrane protein, unknown function	protein_coding_gene
PF3D7_1422100	5610.09	0.400287	0.175079	16.696	0.000236867	0.00158379	ribosomal protein L21, mitochondrial, putative	protein_coding_gene
PF3D7_0410700	8254.42	0.399474	0.221267	24.134	5.74596e-06	7.89234e-05	ribosome biogenesis GTPase A, putative	protein_coding_gene
PF3D7_0308900	16184.1	0.399454	0.297104	2.46434	0.29166	0.38968	splicing factor 3B subunit 1, putative	protein_coding_gene
PF3D7_1313500	279.827	0.399275	0.372268	9.23208	0.00989188	0.0300871	conserved Plasmodium membrane protein, unknown function	protein_coding_gene
PF3D7_1334100	6424.56	0.399196	0.215107	14.444	0.000730355	0.00394179	conserved protein, unknown function	protein_coding_gene
PF3D7_0624500	7070.58	0.398732	0.186462	8.29713	0.0157871	0.0425579	anaphase-promoting complex subunit 11, putative	protein_coding_gene
PF3D7_0304600	1509.74	0.39867	0.239917	4.31546	0.115587	0.191797	circumsporozoite (CS) protein	protein_coding_gene
PF3D7_0716700	2478.11	0.398415	0.276814	3.40249	0.182456	0.272294	conserved Plasmodium protein, unknown function	protein_coding_gene
PF3D7_1148000	7191.58	0.397025	0.211429	25.6008	2.75973e-06	4.47766e-05	serine/threonine protein kinase, putative	protein_coding_gene
PF3D7_0603100	2392.3	0.396869	0.216254	6.92819	0.0313014	0.0710922	RNA-binding protein, putative	protein_coding_gene
PF3D7_1425000	28.22	0.396113	0.767969	0.47339	0.789232	0.832526	Plasmodium RNA of unknown function RUF4	ncRNA_gene
PF3D7_1328300	13993	0.396039	0.180393	4.80433	0.0905218	0.15878	conserved protein, unknown function	protein_coding_gene
PF3D7_0827100	6079.7	0.395689	0.253159	11.7994	0.00274022	0.0110977	translation initiation factor IF-2, putative	protein_coding_gene
PF3D7_1242400	1195.77	0.395428	0.200221	7.71344	0.0211372	0.0530165	GAS8-like protein, putative	protein_coding_gene
PF3D7_0318300	6129.8	0.39506	0.209543	6.60598	0.0367731	0.0805935	conserved Plasmodium protein, unknown function	protein_coding_gene
PF3D7_1446100	152.337	0.395058	0.326313	1.53273	0.464699	0.555541	conserved Plasmodium protein, unknown function	protein_coding_gene
PF3D7_0211600	402.269	0.394783	0.380187	1.51595	0.468613	0.558549	UDP-N-acetylglucosamine transferase subunit ALG14, putative	protein_coding_gene
PF3D7_0603500	5098.82	0.394512	0.19553	10.0715	0.0065014	0.0215689	cation/H+ antiporter	protein_coding_gene
PF3D7_0204000	1135.69	0.394416	0.3291	6.10688	0.0471963	0.0973695	condensin-2 complex subunit H2, putative	protein_coding_gene
PF3D7_1335900	189.167	0.393785	0.307866	3.86247	0.144969	0.227464	thrombospondin-related anonymous protein	protein_coding_gene
PF3D7_1219200	145.764	0.393666	0.386642	3.22746	0.199143	0.291002	rifin, pseudogene	pseudogene
PF3D7_1124300	15683	0.393261	0.253291	2.96713	0.226828	0.321159	conserved protein, unknown function	protein_coding_gene
PF3D7_0419600	44846.4	0.391838	0.224948	3.1009	0.212153	0.305039	ran-specific GTPase-activating protein 1, putative	protein_coding_gene
PF3D7_0817200	3248.86	0.391646	0.194904	5.76321	0.0560448	0.110683	conserved protein, unknown function	protein_coding_gene
PF3D7_0605000	3205.94	0.391558	0.184968	4.49009	0.105923	0.17937	50S ribosomal protein L24, putative	protein_coding_gene
PF3D7_1459400	3904.72	0.391007	0.19681	7.53972	0.0230553	0.0565171	conserved protein, unknown function	protein_coding_gene
PF3D7_0727100	2961.03	0.390831	0.258489	2.29002	0.318221	0.417434	conserved protein, unknown function	protein_coding_gene
PF3D7_1339700	6332.89	0.3908	0.258465	21.6842	1.95584e-05	0.000210793	conserved Plasmodium protein, unknown function	protein_coding_gene
PF3D7_0609600	124.123	0.39063	0.351176	16.8571	0.000218534	0.00148355	conserved Plasmodium protein, unknown function	protein_coding_gene
PF3D7_1016500	1163.05	0.390344	0.212152	8.10738	0.0173582	0.0457715	Plasmodium exported protein (PHISTc), unknown function	protein_coding_gene
PF3D7_0722800	203.43	0.390297	0.453214	9.22083	0.00994771	0.0302215	conserved protein, unknown function	protein_coding_gene
PF3D7_1344000	5178.26	0.39017	0.226309	3.31086	0.19101	0.282623	aminomethyltransferase, putative	protein_coding_gene
PF3D7_0219500	3979.59	0.389646	0.175287	7.7031	0.0212468	0.0531887	pseudouridine synthase, putative	protein_coding_gene
PF3D7_0615900	13283.7	0.389394	0.207899	31.3712	1.54111e-07	5.18722e-06	protein phosphatase, putative	protein_coding_gene
PF3D7_1247500	3239.62	0.389008	0.188452	34.8713	2.67793e-08	1.40442e-06	serine/threonine protein kinase, putative	protein_coding_gene
PF3D7_0531600	65856.8	0.388253	0.475327	3.08996	0.213316	0.306359	18S ribosomal RNA	ncRNA_gene
PF3D7_0316000	833.359	0.388042	0.222696	10.8231	0.00446474	0.0159758	microneme associated antigen	protein_coding_gene
PF3D7_1226800	4714.89	0.387978	0.200541	13.8565	0.000979734	0.00500175	ataxin-3, putative	protein_coding_gene
PF3D7_0530200	10936.9	0.387688	0.203853	16.0343	0.000329764	0.00206281	phosphoenolpyruvate/phosphate translocator	protein_coding_gene
PF3D7_1123800	3895.44	0.387661	0.232278	22.3404	1.40876e-05	0.000159701	structural maintenance of chromosomes protein 5, putative	protein_coding_gene
PF3D7_0630700	1321.99	0.387293	0.237228	2.68168	0.261626	0.358476	bifunctional methylenetetrahydrofolate dehydrogenase/cyclohydrolase, putative	protein_coding_gene
PF3D7_1318400	16479.8	0.387147	0.162613	29.3102	4.31897e-07	1.09386e-05	structural maintenance of chromosomes protein 2, putative	protein_coding_gene
PF3D7_1443400	9985.62	0.386676	0.22656	9.39645	0.00911145	0.028142	WD repeat-containing protein	protein_coding_gene
PF3D7_0210600	1374.3	0.386132	0.277974	2.22764	0.328302	0.426883	protein CERLI1	protein_coding_gene
PF3D7_0933800	273.403	0.385939	0.302108	2.49156	0.287716	0.385503	tubulin delta chain, putative	protein_coding_gene
PF3D7_1015400	7391.27	0.385939	0.1803	5.48627	0.0643682	0.122987	RMI1 domain-containing protein, putative	protein_coding_gene
PF3D7_1041200	9.46252	0.385524	1.1185	2.34485	0.309615	NA	rifin	protein_coding_gene
PF3D7_0919800	7799.58	0.385476	0.167755	22.1348	1.56128e-05	0.000173952	TLD domain-containing protein	protein_coding_gene
PF3D7_1472400	6071.41	0.385418	0.296717	1.6921	0.429107	0.522374	M1-family alanyl aminopeptidase, putative	protein_coding_gene
PF3D7_0707200	5943.71	0.385088	0.187323	31.3474	1.55954e-07	5.18722e-06	conserved Plasmodium protein, unknown function	protein_coding_gene
PF3D7_1122500	1944.11	0.384941	0.213126	16.6276	0.000245109	0.00163364	protein KIC10	protein_coding_gene
PF3D7_1136300	29601.6	0.384841	0.195995	11.4081	0.00333248	0.0128546	tudor staphylococcal nuclease	protein_coding_gene
PF3D7_1104600	246.682	0.384795	0.271884	6.0089	0.0495661	0.101	radial spoke head protein, putative	protein_coding_gene
PF3D7_1244500	83.4913	0.384558	0.441212	0.977762	0.613312	0.688055	PIMMS57 protein	protein_coding_gene
PF3D7_1329100	22813.3	0.382585	0.305985	3.48619	0.174978	0.264153	myosin F, putative	protein_coding_gene
PF3D7_1339600	1991.18	0.38195	0.190032	5.81141	0.0547102	0.108833	conserved Plasmodium protein, unknown function	protein_coding_gene
PF3D7_0212000	2787.91	0.38159	0.255837	2.32639	0.312486	0.411574	GDP-fructose:GMP antiporter, putative	protein_coding_gene
PF3D7_1019600	1054.75	0.380522	0.226436	13.7509	0.00103285	0.00524199	conserved Plasmodium protein, unknown function	protein_coding_gene
PF3D7_1150200	4.13936	0.380245	1.74502	0.483602	0.785213	NA	rifin	protein_coding_gene
PF3D7_1332200	1254.44	0.380009	0.887251	0.17707	0.915271	0.931965	conserved protein, unknown function	protein_coding_gene
PF3D7_1362000	3584.16	0.379928	0.19585	12.4145	0.00201477	0.00875372	cytochrome c oxidase subunit ApiCOX24, putative	protein_coding_gene
PF3D7_0408900	11194.4	0.379232	0.216206	8.30515	0.0157239	0.0424536	tRNA N6-adenosine threonylcarbamoyltransferase	protein_coding_gene
PF3D7_1461100	2347.23	0.37861	0.202529	3.51797	0.172219	0.260895	conserved Plasmodium protein, unknown function	protein_coding_gene
PF3D7_0424400	8.62306	0.378028	1.14425	0.460088	0.794499	NA	surface-associated interspersed protein 4.2 (SURFIN 4.2)	protein_coding_gene
PF3D7_1135500	2559.97	0.377186	0.210611	3.82185	0.147943	0.231038	RNA-binding protein, putative	protein_coding_gene
PF3D7_1437700	4082.42	0.377085	0.216337	4.64928	0.0978185	0.168234	succinyl-CoA ligase, putative	protein_coding_gene
PF3D7_0815800	16069.1	0.376832	0.188934	30.9148	1.93617e-07	6.01952e-06	vacuolar protein sorting-associated protein 9, putative	protein_coding_gene
PF3D7_0619700	2232.02	0.376397	0.237893	2.50921	0.285188	0.383302	F-box protein FBXO1, putative	protein_coding_gene
PF3D7_1431500	16536.9	0.376317	0.29444	1.85969	0.394614	0.490504	mitogen-activated protein kinase 1	protein_coding_gene
PF3D7_0607300	2442.17	0.375925	0.196323	19.252	6.59894e-05	0.000561667	uroporphyrinogen III decarboxylase	protein_coding_gene
PF3D7_0514200	5818.58	0.375821	0.181392	11.4148	0.00332127	0.0128208	conserved Plasmodium protein, unknown function	protein_coding_gene
PF3D7_1122100	1983.37	0.375443	0.207645	11.6536	0.00294746	0.0117176	GPI transamidase component GPI16, putative	protein_coding_gene
PF3D7_1225900	2834.48	0.375176	0.225874	4.47755	0.106589	0.180088	conserved Plasmodium protein, unknown function	protein_coding_gene
PF3D7_0506900	13557.8	0.375096	0.314626	9.6611	0.00798212	0.0253877	rhomboid protease ROM4	protein_coding_gene
PF3D7_1227400	6194.83	0.374493	0.260041	4.13318	0.126617	0.204923	conserved Plasmodium protein, unknown function	protein_coding_gene
PF3D7_1205900	13359.6	0.374387	0.28986	1.96772	0.373865	0.471029	conserved protein, unknown function	protein_coding_gene
PF3D7_1107900	816.661	0.374267	0.340689	2.22151	0.329311	0.427873	mechanosensitive ion channel protein, putative	protein_coding_gene
PF3D7_1040500	6.66584	0.373831	1.63026	0.0760624	0.962683	NA	rifin	protein_coding_gene
PF3D7_1318600	753.378	0.37375	0.257056	2.34297	0.309907	0.409112	thioredoxin, putative	protein_coding_gene
PF3D7_1024700	5239.27	0.373694	0.25953	3.30376	0.191689	0.283362	conserved protein, unknown function	protein_coding_gene
PF3D7_0104700	83.7694	0.373609	0.456717	0.673475	0.714096	0.774027	major facilitator superfamily-related transporter, putative	protein_coding_gene
PF3D7_1343800	3456.7	0.37343	0.229735	43.1777	4.20816e-10	4.98046e-08	VPS13 domain-containing protein, putative	protein_coding_gene
PF3D7_0516100	4519.25	0.373403	0.215947	24.2985	5.29232e-06	7.42642e-05	cation-transporting ATPase 1	protein_coding_gene
PF3D7_1112300	1941.04	0.372997	0.243141	5.38992	0.0675451	0.127664	conserved Plasmodium protein, unknown function	protein_coding_gene
PF3D7_1128000	13058.3	0.372961	0.234147	11.2635	0.00358227	0.0135727	conserved Plasmodium protein, unknown function	protein_coding_gene
PF3D7_1213800	19366.2	0.372949	0.262315	2.84657	0.240922	0.335556	proline--tRNA ligase	protein_coding_gene
PF3D7_0416100	5875.96	0.37275	0.281945	2.27587	0.32048	0.419443	glutamyl-tRNA(Gln) amidotransferase subunit A	protein_coding_gene
PF3D7_0612400	773.405	0.372666	0.248559	3.88066	0.143657	0.225883	conserved Plasmodium protein, unknown function	protein_coding_gene
PF3D7_1428400	556.071	0.372664	0.245222	18.6139	9.07932e-05	0.000728987	WD and tetratricopeptide repeats protein 1, putative	protein_coding_gene
PF3D7_0505100	17473.7	0.372608	0.225072	17.2239	0.000181919	0.00128378	trafficking protein particle complex subunit 8, putative	protein_coding_gene
PF3D7_1116600	7566.23	0.371935	0.28204	1.79727	0.407125	0.502189	dolichyl-diphosphooligosaccharide--protein glycosyltransferase subunit STT3, putative	protein_coding_gene
PF3D7_0632600	19.3994	0.371163	1.20935	1.31826	0.517302	0.604237	rifin, pseudogene	pseudogene
PF3D7_1025300	5237.58	0.370809	0.22281	5.04849	0.080119	0.1451	conserved protein, unknown function	protein_coding_gene
PF3D7_1123500	10112.5	0.370747	0.313559	1.42296	0.490917	0.579414	golgi protein 2	protein_coding_gene
PF3D7_1108600	126088	0.370628	0.208782	14.3499	0.00076553	0.00410179	endoplasmic reticulum-resident calcium binding protein	protein_coding_gene
PF3D7_1351700	1157.83	0.370542	0.228371	24.1123	5.80881e-06	7.9576e-05	inner membrane complex protein 1f, putative	protein_coding_gene
PF3D7_0525400	2947.66	0.370308	0.279333	13.6841	0.00106791	0.00537268	7-helix-1 protein	protein_coding_gene
PF3D7_1305200	1656.8	0.369657	0.197214	3.78384	0.150782	0.23453	AP2 domain transcription factor, putative	protein_coding_gene
PF3D7_1340800	2916.1	0.369166	0.204666	8.72671	0.0127356	0.0362153	mitochondrial pyruvate carrier protein 1, putative	protein_coding_gene
PF3D7_1443000	2026.09	0.369082	0.192969	17.1773	0.000186211	0.00130372	serine/threonine protein kinase	protein_coding_gene
PF3D7_1426300	646.486	0.368102	0.236175	4.89223	0.0866294	0.153718	dynein intermediate chain, putative	protein_coding_gene
PF3D7_0727000	2984.17	0.366508	0.227854	12.1031	0.00235417	0.00990507	vacuolar protein sorting-associated protein 53, putative	protein_coding_gene
PF3D7_0929300	6262.68	0.366352	0.197663	4.88733	0.0868421	0.15378	conserved Plasmodium protein, unknown function	protein_coding_gene
PF3D7_1320200	3792.11	0.366147	0.229295	5.06962	0.0792769	0.144069	TBC domain protein, putative	protein_coding_gene
PF3D7_1249500	3440.92	0.366101	0.174953	4.47022	0.106981	0.180573	protein CutA, putative	protein_coding_gene
PF3D7_1324200	8618.04	0.365695	0.189117	12.2833	0.00215136	0.0091933	micro-fibrillar-associated protein, putative	protein_coding_gene
PF3D7_0525200	12310	0.365672	0.190614	31.7305	1.28766e-07	4.64275e-06	structural maintenance of chromosomes protein 6, putative	protein_coding_gene
PF3D7_0624400	7067.5	0.365465	0.215976	8.90952	0.0116231	0.0340752	conserved protein, unknown function	protein_coding_gene
PF3D7_1233900	13155.6	0.365433	0.280076	2.29827	0.316911	0.416346	sentrin-specific protease 1	protein_coding_gene
PF3D7_1134800	6586.79	0.365044	0.201251	11.3372	0.00345265	0.013181	coatomer subunit delta	protein_coding_gene
PF3D7_0920600	4310.82	0.364748	0.170425	16.6947	0.000237019	0.00158379	conserved Plasmodium protein, unknown function	protein_coding_gene
PF3D7_1415600	7185.73	0.363899	0.169429	13.3633	0.00125371	0.00608768	conserved Plasmodium protein, unknown function	protein_coding_gene
PF3D7_1316900	13431.6	0.36341	0.220229	14.2354	0.000810628	0.00428558	conserved protein, unknown function	protein_coding_gene
PF3D7_1306900	4517.27	0.36204	0.195953	5.0416	0.0803954	0.14546	U1 small nuclear ribonucleoprotein A, putative	protein_coding_gene
PF3D7_1422600	3680.23	0.360631	0.199066	11.9293	0.00256788	0.010563	conserved Plasmodium protein, unknown function	protein_coding_gene
PF3D7_0933100	544.216	0.360378	0.362791	1.3712	0.503788	0.590826	conserved Plasmodium protein, unknown function	protein_coding_gene
PF3D7_0105600	3731.42	0.360224	0.299607	1.73062	0.42092	0.514943	FtsJ-like methyltransferase, putative	protein_coding_gene
PF3D7_0216600	6333.76	0.359385	0.206956	5.72797	0.0570411	0.112223	sugar transporter, putative	protein_coding_gene
PF3D7_0828200	12460.8	0.358525	0.321034	4.94158	0.0845179	0.150589	leucine--tRNA ligase, putative	protein_coding_gene
PF3D7_0805100	168.424	0.358348	0.322677	1.32002	0.516846	0.60384	conserved protein, unknown function	protein_coding_gene
PF3D7_0924100	2264.24	0.358299	0.201995	19.8375	4.92419e-05	0.000446965	conserved Plasmodium protein, unknown function	protein_coding_gene
PF3D7_0825000	10772.6	0.357911	0.192042	31.3243	1.57768e-07	5.18722e-06	conserved Plasmodium protein, unknown function	protein_coding_gene
PF3D7_0317900	3665.64	0.35774	0.248936	3.67836	0.158947	0.24481	conserved protein, unknown function	protein_coding_gene
PF3D7_0925300	8495.95	0.357615	0.19234	7.30791	0.0258885	0.0617141	proline--tRNA ligase, putative	protein_coding_gene
PF3D7_0317400	3064.55	0.357468	0.181614	30.1187	2.88281e-07	7.63649e-06	DNA replication complex GINS protein, putative	protein_coding_gene
PF3D7_0415800	619.354	0.357315	0.249131	2.79072	0.247744	0.34301	PhIL1-interacting candidate PIC3	protein_coding_gene
PF3D7_1008400	33610.3	0.356394	0.183277	4.5579	0.102392	0.174702	26S protease regulatory subunit 4, putative	protein_coding_gene
PF3D7_0307600	3950.42	0.355952	0.243326	12.9018	0.00157912	0.00724917	conserved Plasmodium protein, unknown function	protein_coding_gene
PF3D7_0934800	7887.97	0.35539	0.443049	6.0238	0.0491982	0.100525	cAMP-dependent protein kinase catalytic subunit	protein_coding_gene
PF3D7_1328500	7246.11	0.355308	0.276468	8.49928	0.0142694	0.039424	alpha/beta-hydrolase, putative	protein_coding_gene
PF3D7_1114500	623.69	0.355089	0.266006	1.8234	0.401841	0.497838	conserved Plasmodium protein, unknown function	protein_coding_gene
PF3D7_1366900	27950.1	0.354972	0.223096	17.3702	0.000169085	0.00121164	conserved protein, unknown function	protein_coding_gene
PF3D7_0705500	14175.4	0.354934	0.24178	22.3284	1.41728e-05	0.000160316	inositol-phosphate phosphatase, putative	protein_coding_gene
PF3D7_1201900	6894.28	0.354488	0.213631	5.01576	0.0814406	0.147168	conserved protein, unknown function	protein_coding_gene
PF3D7_1012700	6120.18	0.354334	0.208608	15.8924	0.000354	0.00218286	NLI interacting factor-like phosphatase, putative	protein_coding_gene
PF3D7_0321700	4558.72	0.354163	0.219792	18.3278	0.000104755	0.000817878	conserved Plasmodium protein, unknown function	protein_coding_gene
PF3D7_1368400	4496.46	0.35392	0.193689	6.66789	0.0356521	0.0787695	ribosomal protein L1, putative	protein_coding_gene
PF3D7_0612300	177.607	0.353251	0.307835	2.58186	0.275014	0.372813	transmembrane protein 234, putative	protein_coding_gene
PF3D7_0723700	4945.79	0.352262	0.289746	1.44442	0.485678	0.574536	metallo-hydrolase/oxidoreductase, putative	protein_coding_gene
PF3D7_0805500	1949.02	0.351672	0.178867	7.93697	0.018902	0.0489473	conserved Plasmodium protein, unknown function	protein_coding_gene
PF3D7_1432600	5649.11	0.351494	0.216299	4.98576	0.0826714	0.148522	conserved Plasmodium protein, unknown function	protein_coding_gene
PF3D7_1002700	4586.47	0.351316	0.168553	18.4209	9.99885e-05	0.000786576	conserved Plasmodium protein, unknown function	protein_coding_gene
PF3D7_1410700	8711.81	0.351052	0.188661	13.3291	0.00127535	0.00614822	conserved protein, unknown function	protein_coding_gene
PF3D7_1019300	4505.8	0.350301	0.264666	19.4299	6.03744e-05	0.000521571	zinc finger protein, putative	protein_coding_gene
PF3D7_1117100	8551.14	0.349948	0.176565	11.8034	0.00273475	0.0110939	ubiquitin carboxyl-terminal hydrolase UCH54	protein_coding_gene
PF3D7_0827800	14976.5	0.349642	0.222785	21.2832	2.39003e-05	0.000246211	SET domain protein, putative	protein_coding_gene
PF3D7_0818600	1569.12	0.348837	0.196813	3.2361	0.198285	0.289999	BEM46-like protein, putative	protein_coding_gene
PF3D7_0308300	280.1	0.348643	0.376174	0.931231	0.627749	0.700467	PhIL1-interacting candidate PIC4	protein_coding_gene
PF3D7_0924400	16171.2	0.348433	0.208645	15.0388	0.000542465	0.00312326	conserved Plasmodium protein, unknown function	protein_coding_gene
PF3D7_1216700	588.706	0.348386	0.298955	4.70818	0.09498	0.164543	perforin-like protein 2	protein_coding_gene
PF3D7_0322100	6569.76	0.347724	0.205795	10.2341	0.00599375	0.0201682	mRNA-capping enzyme subunit beta	protein_coding_gene
PF3D7_0621400	207.109	0.34771	0.410956	1.26889	0.530229	0.616148	Pf77 protein	protein_coding_gene
PF3D7_0605900	1889.67	0.347684	0.277408	1.89063	0.388557	0.484904	elongation of fatty acids protein, putative	protein_coding_gene
PF3D7_1132600	9921.74	0.346905	0.194296	3.51697	0.172305	0.260895	pre-mRNA-splicing factor 38A, putative	protein_coding_gene
PF3D7_1018000	6824.99	0.345946	0.189734	13.4975	0.00117235	0.00578047	tRNA pseudouridine synthase, putative	protein_coding_gene
PF3D7_0418300	76930.5	0.345611	0.182414	8.38434	0.0151134	0.0411422	conserved Plasmodium protein, unknown function	protein_coding_gene
PF3D7_0704800	2035.78	0.345195	0.215639	4.01493	0.134329	0.214992	protein phosphatase PPM12, putative	protein_coding_gene
PF3D7_0217200	1744.61	0.344572	0.223202	22.9175	1.05567e-05	0.000129575	conserved Plasmodium protein, unknown function	protein_coding_gene
PF3D7_1312300	1654.26	0.343852	0.231012	2.32661	0.312452	0.411574	ribosomal protein S35, mitochondrial, putative	protein_coding_gene
PF3D7_0910800	6747.81	0.34362	0.227493	3.91589	0.141148	0.22302	cytosolic Fe-S cluster assembly factor NBP35, putative	protein_coding_gene
PF3D7_0819700	686.123	0.343412	0.317145	1.3485	0.509537	0.596913	conserved Plasmodium protein, unknown function	protein_coding_gene
PF3D7_1306400	32465	0.343179	0.198127	3.14457	0.20757	0.300197	26S protease regulatory subunit 10B, putative	protein_coding_gene
PF3D7_1411200	8997.81	0.343111	0.282744	2.57657	0.275743	0.37329	rhomboid protease ROM8	protein_coding_gene
PF3D7_1145100	6024.96	0.341545	0.29227	2.9857	0.224732	0.318887	coatomer subunit gamma, putative	protein_coding_gene
PF3D7_0615800	4019.99	0.34123	0.228017	11.3342	0.00345794	0.0131915	conserved oligomeric Golgi complex subunit 4, putative	protein_coding_gene
PF3D7_0727500	3297.82	0.34093	0.190331	6.94359	0.0310612	0.0706394	mTERF domain-containing protein, putative	protein_coding_gene
PF3D7_0313600	5611.02	0.340719	0.249229	3.57742	0.167176	0.255588	conserved Plasmodium protein, unknown function	protein_coding_gene
PF3D7_0202600	5292.59	0.340259	0.290527	19.7488	5.14751e-05	0.000462386	nucleic acid-binding protein, putative	protein_coding_gene
PF3D7_0412500	1.26019	0.340015	3.4191	1.46482	0.480749	NA	Plasmodium RNA of unknown function RUF6	ncRNA_gene
PF3D7_0711800	1.26019	0.340015	3.4191	1.46482	0.480749	NA	Plasmodium RNA of unknown function RUF6	ncRNA_gene
PF3D7_1349000	222.144	0.339917	0.296622	5.46707	0.0649892	0.123871	conserved Plasmodium protein, unknown function	protein_coding_gene
PF3D7_0311800	9241.37	0.339879	0.195322	5.81574	0.0545919	0.10864	ATP synthase F0 subunit d-like protein, putative	protein_coding_gene
PF3D7_1345500	2417.64	0.339704	0.198029	4.07992	0.130034	0.20954	ubiquitin-conjugating enzyme E2	protein_coding_gene
PF3D7_0413400	18.4313	0.339517	0.807091	3.11889	0.210253	0.303231	erythrocyte membrane protein 1 (PfEMP1), exon 1, pseudogene	pseudogene
PF3D7_0729600	4450.24	0.339488	0.168382	6.22249	0.0445455	0.0931455	COX assembly mitochondrial protein, putative	protein_coding_gene
PF3D7_0813100	946.545	0.33883	0.218562	5.63365	0.0597954	0.11632	conserved Plasmodium protein, unknown function	protein_coding_gene
PF3D7_1437000	7280.41	0.338789	0.243105	2.02018	0.364185	0.461183	N-acetyltransferase, GNAT family, putative	protein_coding_gene
PF3D7_0627100	19446.3	0.338563	0.308423	2.74081	0.254005	0.350277	ankyrin-repeat protein, putative	protein_coding_gene
PF3D7_0718100	10545.2	0.337967	0.21279	33.1869	6.21679e-08	2.6457e-06	exported serine/threonine protein kinase	protein_coding_gene
PF3D7_1004600	1615.43	0.337599	0.261701	12.7492	0.0017043	0.00771466	conserved Plasmodium membrane protein, unknown function	protein_coding_gene
PF3D7_0912600	270.197	0.337241	0.391325	1.41794	0.492151	0.580342	conserved Plasmodium protein, unknown function	protein_coding_gene
PF3D7_0516700	16866.5	0.337041	0.252809	2.92727	0.231393	0.325846	ubiquitin carboxyl-terminal hydrolase 2, putative	protein_coding_gene
PF3D7_0825800	356.336	0.336649	0.27217	3.03513	0.219245	0.312554	PH-like domain-containing protein, putative	protein_coding_gene
PF3D7_0816200	2551.62	0.336581	0.230856	2.86	0.239309	0.334182	vacuolar protein sorting-associated protein 2, putative	protein_coding_gene
PF3D7_0714200	7719.21	0.336294	0.217378	14.7578	0.00062428	0.00349274	conserved Plasmodium protein, unknown function	protein_coding_gene
PF3D7_0807700	991.743	0.33618	0.281757	2.49775	0.286827	0.384512	serine protease DegP	protein_coding_gene
PF3D7_0519500	21269.9	0.335906	0.256485	18.8956	7.88638e-05	0.000653048	CCR4 domain-containing protein 1, putative	protein_coding_gene
PF3D7_0403200	13278.1	0.335647	0.211801	12.9507	0.00154093	0.00712422	pre-mRNA splicing factor, putative	protein_coding_gene
PF3D7_0927900	17599.7	0.335475	0.195857	11.4789	0.00321659	0.0125004	phosphatidylserine decarboxylase	protein_coding_gene
PF3D7_1349500	17751	0.335432	0.218251	28.3267	7.06203e-07	1.58043e-05	conserved Plasmodium protein, unknown function	protein_coding_gene
PF3D7_0810400	3413.51	0.335202	0.252828	5.38031	0.0678704	0.128093	aquaporin, putative	protein_coding_gene
PF3D7_1319400	20509.3	0.334892	0.180367	26.9862	1.38046e-06	2.63776e-05	conserved protein, unknown function	protein_coding_gene
PF3D7_0112300	1010.07	0.334553	0.350825	17.398	0.000166749	0.00120412	18S ribosomal RNA	ncRNA_gene
PF3D7_1013500	6733.82	0.334482	0.292547	2.19323	0.333999	0.432882	phosphoinositide-specific phospholipase C	protein_coding_gene
PF3D7_0611400	4561.16	0.333668	0.211286	4.80028	0.0907051	0.158994	SWI/SNF-related matrix-associated actin-dependent regulator of chromatin	protein_coding_gene
PF3D7_0522100	1521.83	0.333473	0.192373	22.6519	1.2056e-05	0.000141617	conserved Plasmodium protein, unknown function	protein_coding_gene
PF3D7_0824000	683.308	0.333463	0.255104	13.5143	0.00116254	0.00574303	conserved Plasmodium protein, unknown function	protein_coding_gene
PF3D7_1430300	10358.4	0.333111	0.294222	16.4954	0.000261857	0.00172533	acid phosphatase, putative	protein_coding_gene
PF3D7_1032400	11292.3	0.332942	0.173458	11.1759	0.00374268	0.0139397	phosphatidylinositol N-acetylglucosaminyltransferase subunit A, putative	protein_coding_gene
PF3D7_0904300	432.584	0.332855	0.272429	3.37059	0.18539	0.27588	conserved protein, unknown function	protein_coding_gene
PF3D7_0724100	22680	0.332726	0.227573	21.6831	1.9569e-05	0.000210793	conserved Plasmodium protein, unknown function	protein_coding_gene
PF3D7_0321000	6087.82	0.332356	0.205976	7.0329	0.0297048	0.0684507	conserved protein, unknown function	protein_coding_gene
PF3D7_0605300	4971.67	0.332261	0.19255	10.9768	0.00413437	0.0150355	serine/threonine protein kinase ARK1	protein_coding_gene
PF3D7_0215000	11507.2	0.331975	0.19272	3.51113	0.17281	0.261507	acyl-CoA synthetase	protein_coding_gene
PF3D7_1011300	1067.57	0.331429	0.234805	2.34759	0.309191	0.40844	protein ARV1, putative	protein_coding_gene
PF3D7_0506800	6644.84	0.330903	0.275771	10.8116	0.00449042	0.0160236	transcription factor 25, putative	protein_coding_gene
PF3D7_1124100	12286.9	0.330846	0.245912	16.1862	0.000305638	0.00194708	BEACH domain-containing protein, putative	protein_coding_gene
PF3D7_1368200	22171.6	0.330446	0.284921	2.38473	0.303503	0.402168	ABC transporter E family member 1, putative	protein_coding_gene
PF3D7_1473400	477.795	0.330425	0.293573	6.13202	0.0466067	0.0963689	conserved protein, unknown function	protein_coding_gene
PF3D7_0727900	3084.69	0.330206	0.199008	21.0843	2.64005e-05	0.00026732	conserved Plasmodium protein, unknown function	protein_coding_gene
PF3D7_1233000	7488.16	0.32993	0.281797	3.11689	0.210463	0.303366	elongation factor G	protein_coding_gene
PF3D7_1369200	4443.1	0.3298	0.246683	10.074	0.00649314	0.0215552	conserved Plasmodium protein, unknown function	protein_coding_gene
PF3D7_1323800	3796.57	0.329418	0.179921	24.8866	3.94399e-06	6.04276e-05	vacuolar protein sorting-associated protein 52, putative	protein_coding_gene
PF3D7_1022700	1285.59	0.329154	0.330256	1.1168	0.572125	0.651848	phospholipid scramblase	protein_coding_gene
PF3D7_1233700	1304.29	0.328583	0.205182	2.88043	0.236877	0.331768	homocysteine S-methyltransferase, putative	protein_coding_gene
PF3D7_0625200	939.143	0.327869	0.217358	7.82329	0.0200075	0.0509711	conserved Plasmodium protein, unknown function	protein_coding_gene
PF3D7_1362800	2585.95	0.327556	0.255331	1.71999	0.423164	0.517032	conserved Plasmodium protein, unknown function	protein_coding_gene
PF3D7_0719500	5596.32	0.327234	0.231823	4.93959	0.0846022	0.150688	LEM3/CDC50 family protein, putative	protein_coding_gene
PF3D7_0303000	3092.35	0.327231	0.255582	1.65609	0.436902	0.529875	N-ethylmaleimide-sensitive fusion protein	protein_coding_gene
PF3D7_1445300	4056.62	0.326962	0.205106	4.88204	0.0870718	0.154135	ribosomal protein S29, mitochondrial, putative	protein_coding_gene
PF3D7_0813500	2277.57	0.326608	0.232286	2.22319	0.329034	0.427621	PUB domain-containing protein, putative	protein_coding_gene
PF3D7_0400300	428.751	0.326579	0.283782	8.21571	0.016443	0.0438255	rifin	protein_coding_gene
PF3D7_0217600	12127.9	0.32617	0.238381	2.69584	0.25978	0.356537	conserved Plasmodium protein, unknown function	protein_coding_gene
PF3D7_1220600	1884.35	0.325878	0.204025	2.54817	0.279686	0.377373	conserved Plasmodium protein, unknown function	protein_coding_gene
PF3D7_0523900	1824.21	0.325857	0.1988	10.1609	0.00621696	0.0207579	MerC domain-containing protein, putative	protein_coding_gene
PF3D7_0700400	1.20183	0.32562	3.64907	0.0516946	0.974484	NA	stevor	protein_coding_gene
PF3D7_1413700	2050.13	0.325493	0.208878	7.4418	0.0242122	0.0587429	DET1 domain-containing protein, putative	protein_coding_gene
PF3D7_1423800	7576.52	0.325428	0.194552	15.3941	0.000454173	0.00269493	vacuolar protein sorting-associated protein 3, putative	protein_coding_gene
PF3D7_1403100	13657.9	0.325304	0.255529	11.2367	0.00363066	0.0136895	condensin complex subunit 1, putative	protein_coding_gene
PF3D7_1119600	8087.21	0.325248	0.299661	2.59358	0.273407	0.371022	ATP-dependent zinc metalloprotease FTSH, putative	protein_coding_gene
PF3D7_1429800	14299.4	0.325089	0.265997	6.40175	0.0407265	0.0871249	coatomer subunit beta, putative	protein_coding_gene
PF3D7_0629800	9268.22	0.324734	0.24533	8.86821	0.0118657	0.0345328	cullin-2, putative	protein_coding_gene
PF3D7_0102800	1563.14	0.324483	0.183713	5.26505	0.0718966	0.134035	seipin domain-containing protein, putative	protein_coding_gene
PF3D7_1243900	1461.49	0.324159	0.231435	2.41796	0.298502	0.397186	double C2-like domain-containing protein	protein_coding_gene
PF3D7_1417300	847.723	0.324155	0.212131	13.5338	0.00115128	0.00570368	cysteine protease ATG4, putative	protein_coding_gene
PF3D7_0803800	40311.3	0.323826	0.20589	7.72746	0.0209896	0.0527739	proteasome subunit beta type-4	protein_coding_gene
PF3D7_1128300	2388.88	0.323819	0.291036	5.41093	0.0668392	0.126699	ATP-dependent 6-phosphofructokinase	protein_coding_gene
PF3D7_0904700	2075.4	0.323436	0.221116	8.01959	0.0181371	0.0474159	bacterial histone-like protein	protein_coding_gene
PF3D7_1323300	3956.46	0.323152	0.184817	5.26039	0.0720646	0.134203	N-acetyltransferase, GNAT family, putative	protein_coding_gene
PF3D7_0817400	2437.29	0.323033	0.187515	3.03519	0.219239	0.312554	phosphatase, putative	protein_coding_gene
PF3D7_0506300	5132.5	0.322818	0.17672	3.39374	0.183256	0.273175	conserved protein, unknown function	protein_coding_gene
PF3D7_1250800	21342.7	0.322432	0.27098	4.26976	0.118259	0.195168	DNA repair protein rhp16, putative	protein_coding_gene
PF3D7_1202600	26420.2	0.322368	0.238968	6.726	0.0346312	0.0770043	nuclear export mediator factor NEMF, putative	protein_coding_gene
PF3D7_1440200	6960.46	0.322198	0.267103	8.96636	0.0112974	0.0333274	stromal-processing peptidase, putative	protein_coding_gene
PF3D7_0812200	912.031	0.321898	0.198097	4.27282	0.118078	0.194984	trypsin-like serine protease, putative	protein_coding_gene
PF3D7_1330200	5263.54	0.321743	0.217153	10.4122	0.00548308	0.0188709	conserved Plasmodium protein, unknown function	protein_coding_gene
PF3D7_0716600	2138.58	0.321655	0.196864	4.16704	0.124491	0.202486	cysteine desulfurase	protein_coding_gene
PF3D7_0507700	13535.3	0.32147	0.212529	2.53393	0.281685	0.379478	nuclear protein localization protein 4, putative	protein_coding_gene
PF3D7_1364700	134.414	0.321223	0.390963	1.14854	0.563117	0.644606	WD repeat-containing protein, putative, pseudogene	pseudogene
PF3D7_1330700	3160.44	0.321132	0.177777	3.82675	0.147581	0.2306	GPI transamidase subunit PIG-U, putative	protein_coding_gene
PF3D7_1014100	481.789	0.32106	0.466399	16.7358	0.000232203	0.00155964	merozoite surface protein MSA180	protein_coding_gene
PF3D7_0910400	6708.38	0.320789	0.251086	1.8217	0.402181	0.498003	selenide water dikinase, putative	protein_coding_gene
PF3D7_1421900	8475.88	0.320596	0.223567	4.37662	0.112106	0.187385	copper transporter, putative	protein_coding_gene
PF3D7_0109800	7106.51	0.320526	0.233583	7.36751	0.0251285	0.0602619	phenylalanine--tRNA ligase alpha subunit	protein_coding_gene
PF3D7_1019500	18525.1	0.320246	0.179721	11.7269	0.00284148	0.0114276	TMEM94 domain-containing protein, putative	protein_coding_gene
PF3D7_0614000	14125.7	0.31996	0.20322	3.02604	0.220244	0.313547	thiamine-phosphate synthase, putative	protein_coding_gene
PF3D7_0820900	3022.82	0.319774	0.184474	22.1399	1.55736e-05	0.000173889	conserved Plasmodium protein, unknown function	protein_coding_gene
PF3D7_0417300	11042.5	0.319207	0.224016	7.49488	0.023578	0.0575537	LETM1-like protein, putative	protein_coding_gene
PF3D7_1322200	12480.9	0.319108	0.243278	18.7567	8.45347e-05	0.000689018	TOG domain-containing protein, putative	protein_coding_gene
PF3D7_0935200	13865.5	0.318852	0.236577	6.8186	0.0330643	0.0742096	vacuolar protein sorting-associated protein 33, putative	protein_coding_gene
PF3D7_1103400	12491	0.31881	0.209636	27.8533	8.94835e-07	1.90409e-05	iron-sulfur cluster assembly protein SufD	protein_coding_gene
PF3D7_1328900	2659.39	0.318556	0.186912	7.00708	0.0300907	0.0690067	PUB domain-containing protein, putative	protein_coding_gene
PF3D7_0704700	2397.59	0.318513	0.192706	18.5432	9.40579e-05	0.000747854	phosphopantetheine adenylyltransferase, putative	protein_coding_gene
PF3D7_0404100	374.204	0.318359	0.28157	16.7641	0.000228936	0.00153969	AP2 domain transcription factor AP2-SP2, putative	protein_coding_gene
PF3D7_1348800	197.567	0.318057	0.368024	3.13308	0.208766	0.301422	E1-E2 ATPase, putative	protein_coding_gene
PF3D7_0207000	19753.1	0.317767	0.273909	7.09223	0.0288364	0.0671383	merozoite surface protein 4	protein_coding_gene
PF3D7_0629200	21793.7	0.317437	0.233292	2.93053	0.231016	0.325404	DnaJ protein, putative	protein_coding_gene
PF3D7_1303500	12174.4	0.317421	0.212006	7.53864	0.0230677	0.0565207	sodium/hydrogen exchanger	protein_coding_gene
PF3D7_0523300	3354.23	0.317244	0.193019	4.99533	0.0822767	0.148121	cytochrome c oxidase subunit ApiCOX18, putative	protein_coding_gene
PF3D7_1005500	35346.1	0.316885	0.266071	3.70532	0.15682	0.242324	regulator of nonsense transcripts 1, putative	protein_coding_gene
PF3D7_1113000	1479.66	0.316751	0.207011	42.1161	7.15481e-10	7.90378e-08	conserved Plasmodium protein, unknown function	protein_coding_gene
PF3D7_1344300	1949.04	0.316705	0.194427	22.6949	1.17994e-05	0.000139868	zinc finger protein, putative	protein_coding_gene
PF3D7_0902100	479.123	0.316686	0.248324	4.27594	0.117894	0.194885	serine/threonine protein kinase, FIKK family	protein_coding_gene
PF3D7_1420200	2369.69	0.316513	0.201415	9.98997	0.00677183	0.022203	myosin-specific chaperone UNC, putative	protein_coding_gene
PF3D7_0221000	25.503	0.31584	0.768008	1.76205	0.414359	0.50929	Plasmodium exported protein, unknown function	protein_coding_gene
PF3D7_1344700	2486.82	0.315837	0.28337	5.19431	0.0744853	0.137332	conserved Plasmodium protein, unknown function	protein_coding_gene
PF3D7_1359400	47948.4	0.315772	0.211532	3.53597	0.170676	0.25957	CUGBP Elav-like family member 1	protein_coding_gene
PF3D7_0418800	17.3597	0.315194	1.01371	1.45721	0.482583	0.571526	MOLO1 domain-containing protein, putative	protein_coding_gene
PF3D7_0719900	19352.1	0.314777	0.27363	15.8114	0.000368643	0.00226241	conserved Plasmodium membrane protein, unknown function	protein_coding_gene
PF3D7_1124500	3485.81	0.314191	0.188886	4.43687	0.108779	0.183142	pyruvate dehydrogenase E1 component subunit alpha	protein_coding_gene
PF3D7_0717100	15636.4	0.313842	0.214756	3.21163	0.200726	0.292416	CRAL/TRIO domain-containing protein, putative	protein_coding_gene
PF3D7_1034500	9815.6	0.313788	0.209614	15.0039	0.000551996	0.00316681	armadillo repeat protein, putative	protein_coding_gene
PF3D7_0529800	10920.9	0.313259	0.224486	33.7828	4.61496e-08	2.15864e-06	conserved Plasmodium protein, unknown function	protein_coding_gene
PF3D7_0907500	706.415	0.313144	0.249738	1.83405	0.399706	0.496239	conserved protein, unknown function	protein_coding_gene
PF3D7_1244600	2674.05	0.312562	0.219438	2.14062	0.342902	0.440958	ADP-ribosylation factor GTPase-activating protein 1	protein_coding_gene
PF3D7_0723800	13047.7	0.312285	0.256559	27.8366	9.02295e-07	1.9116e-05	conserved Plasmodium protein, unknown function	protein_coding_gene
PF3D7_0706700	270.249	0.311315	0.440858	0.483602	0.785212	0.82925	DNA mismatch repair protein MSH2, putative	protein_coding_gene
PF3D7_1223300	4155.62	0.311005	0.249206	12.123	0.00233092	0.00981518	DNA gyrase subunit A	protein_coding_gene
PF3D7_1455500	10966.2	0.310601	0.257807	7.44984	0.024115	0.0585892	AP-1 complex subunit gamma, putative	protein_coding_gene
PF3D7_1324800	16725.2	0.310231	0.210438	3.87962	0.143731	0.225932	dihydrofolate synthase/folylpolyglutamate synthase	protein_coding_gene
PF3D7_0830100	3707.87	0.309485	0.186396	16.2189	0.00030068	0.00192021	non-coding RNA	ncRNA_gene
PF3D7_1139800	3548.88	0.309116	0.190685	34.9006	2.63901e-08	1.39814e-06	conserved Plasmodium protein, unknown function	protein_coding_gene
PF3D7_1347000	523.579	0.308407	0.254379	3.13872	0.208178	0.300824	WD repeat-containing protein 92, putative	protein_coding_gene
PF3D7_0503100	4640.04	0.308392	0.215655	7.07426	0.0290967	0.0675022	4-diphosphocytidyl-2-C-methyl-D-erythritol kinase, putative	protein_coding_gene
PF3D7_0316300	33090.8	0.308295	0.170454	6.3431	0.0419385	0.0889116	inorganic pyrophosphatase	protein_coding_gene
PF3D7_0722100	3963.27	0.308065	0.219722	8.00752	0.0182469	0.0476069	protein pelota homolog, putative	protein_coding_gene
PF3D7_1014600	41979.4	0.307652	0.245307	12.5453	0.00188725	0.00834633	transcriptional coactivator ADA2	protein_coding_gene
PF3D7_0316700	9255.34	0.307349	0.194714	13.6559	0.00108309	0.00543323	protein YOP1, putative	protein_coding_gene
PF3D7_0926500	4488.12	0.307035	0.253766	20.8079	3.03125e-05	0.000299776	tetratricopeptide repeat protein, putative	protein_coding_gene
PF3D7_1363100	3533.1	0.30591	0.188737	9.26036	0.00975299	0.0298043	conserved Plasmodium protein, unknown function	protein_coding_gene
PF3D7_1030600	7090.34	0.305289	0.252508	1.83204	0.400109	0.496488	tRNA N6-adenosine threonylcarbamoyltransferase	protein_coding_gene
PF3D7_0417200	18154.6	0.305009	0.190907	13.4714	0.00118777	0.00583435	bifunctional dihydrofolate reductase-thymidylate synthase	protein_coding_gene
PF3D7_0202700	2313.83	0.304898	0.19973	4.71088	0.0948518	0.164376	octaprenyl pyrophosphate synthase	protein_coding_gene
PF3D7_1002200	13375.5	0.304202	0.182442	27.369	1.13999e-06	2.2722e-05	tryptophan-rich antigen 3	protein_coding_gene
PF3D7_1443600	1689.64	0.303862	0.227249	13.0877	0.00143896	0.00677344	gamma-tubulin complex component, putative	protein_coding_gene
PF3D7_0111500	8741.42	0.303751	0.21134	3.80844	0.148939	0.232428	UMP-CMP kinase, putative	protein_coding_gene
PF3D7_1130500	7739.16	0.303392	0.17265	8.65119	0.0132256	0.0372998	conserved oligomeric Golgi complex subunit 2, putative	protein_coding_gene
PF3D7_1232000	2095.07	0.303364	0.196538	4.21781	0.121371	0.199039	phenylalanine--tRNA ligase	protein_coding_gene
PF3D7_0218100	529.879	0.303225	0.356983	1.05431	0.590281	0.668354	conserved protein, unknown function	protein_coding_gene
PF3D7_1453400	2197.51	0.303038	0.268661	8.68976	0.0129731	0.0367464	gamma-tubulin complex component, putative	protein_coding_gene
PF3D7_0608900	3193.56	0.303022	0.190533	2.83042	0.242875	0.337619	conserved Plasmodium protein, unknown function	protein_coding_gene
PF3D7_1112600	3561.96	0.302922	0.188432	8.2295	0.01633	0.0436723	ATPase, putative	protein_coding_gene
PF3D7_0323700	8463.27	0.302552	0.203851	20.0248	4.48396e-05	0.000414248	U4/U6.U5 tri-snRNP-associated protein 1, putative	protein_coding_gene
PF3D7_1115200	11951.7	0.302035	0.172827	15.1822	0.000504928	0.00295557	histone-lysine N-methyltransferase SET7	protein_coding_gene
PF3D7_1418800	1176.14	0.30164	0.398308	7.47228	0.023846	0.0580716	signal recognition particle RNA	ncRNA_gene
PF3D7_1323200	9944.05	0.301528	0.175282	20.3989	3.71905e-05	0.000354299	V-type proton ATPase subunit G, putative	protein_coding_gene
PF3D7_0407900	7904.65	0.301491	0.191222	3.2459	0.197316	0.289233	AAA family ATPase, putative	protein_coding_gene
PF3D7_0529000	18531.7	0.301413	0.213436	9.89014	0.00711841	0.0230704	T-cell immunomodulatory protein homolog, putative	protein_coding_gene
PF3D7_0926400	9129.57	0.301412	0.287063	11.0204	0.00404527	0.0147805	monocarboxylate transporter, putative	protein_coding_gene
PF3D7_0509500	2291.97	0.301188	0.193662	5.39566	0.0673515	0.127391	ERCC4 domain-containing protein, putative	protein_coding_gene
PF3D7_1422700	12540.9	0.300999	0.207241	9.54555	0.00845688	0.0265627	conserved protein, unknown function	protein_coding_gene
PF3D7_1237500	8225.01	0.300596	0.192843	18.7365	8.53929e-05	0.000694921	conserved Plasmodium protein, unknown function	protein_coding_gene
PF3D7_1137200	974.965	0.299877	0.346743	0.790117	0.673641	0.740656	apical exonemal protein	protein_coding_gene
PF3D7_0820600	449.322	0.299753	0.316243	3.23735	0.198162	0.289967	conserved protein, unknown function	protein_coding_gene
PF3D7_0614200	3285.14	0.299251	0.244745	2.10436	0.349175	0.447303	cytosolic Fe-S cluster assembly factor NAR1, putative	protein_coding_gene
PF3D7_0420200	2184	0.298719	0.289334	2.3947	0.301993	0.400702	holo-[acyl-carrier-protein] synthase, putative	protein_coding_gene
PF3D7_0416900	9278.39	0.298443	0.223497	22.8417	1.09647e-05	0.000133322	conserved Plasmodium protein, unknown function	protein_coding_gene
PF3D7_1134100	15674.3	0.298291	0.185258	12.0215	0.00245221	0.0102238	protein disulfide-isomerase, putative	protein_coding_gene
PF3D7_1453100	346.399	0.298088	0.27249	1.24877	0.53559	0.620849	dynactin subunit 4, putative	protein_coding_gene
PF3D7_1013100	11171.4	0.297398	0.190848	4.19062	0.123032	0.200938	U3 small nucleolar RNA-associated protein 13, putative	protein_coding_gene
PF3D7_1211700	37282.6	0.297034	0.211977	10.9253	0.0042423	0.015338	DNA replication licensing factor MCM5, putative	protein_coding_gene
PF3D7_1450800	2013.59	0.296706	0.214619	2.43546	0.295902	0.394637	conserved protein, unknown function	protein_coding_gene
PF3D7_1443800	7161.81	0.295984	0.212684	5.15678	0.0758961	0.13929	pre-mRNA-splicing factor CWC24, putative	protein_coding_gene
PF3D7_0821600	7085.78	0.295865	0.229685	3.27762	0.194211	0.285893	polyribonucleotide 5'-hydroxyl-kinase Clp1, putative	protein_coding_gene
PF3D7_1401700	110.337	0.295575	0.50518	0.483718	0.785167	0.82925	conserved Plasmodium protein, unknown function	protein_coding_gene
PF3D7_1332400	4629.13	0.295559	0.247526	1.61984	0.444893	0.537933	nucleotidyltransferase, putative	protein_coding_gene
PF3D7_1364000	3467.62	0.295456	0.235124	5.16261	0.0756751	0.138983	conserved protein, unknown function	protein_coding_gene
PF3D7_0100200	1108.5	0.295064	0.218682	7.47257	0.0238426	0.0580716	rifin	protein_coding_gene
PF3D7_1133900	6915.19	0.294749	0.215979	14.338	0.000770086	0.00411347	conserved Plasmodium protein, unknown function	protein_coding_gene
PF3D7_1338700	16923.9	0.294671	0.209351	8.90142	0.0116703	0.034175	conserved protein, unknown function	protein_coding_gene
PF3D7_1417100	2312.94	0.294661	0.220497	3.26125	0.195807	0.287428	conserved Plasmodium protein, unknown function	protein_coding_gene
PF3D7_0724300	1787.72	0.294503	0.22783	8.12445	0.0172107	0.0454517	ubiquinone biosynthesis O-methyltransferase, putative	protein_coding_gene
PF3D7_0716300	70461.6	0.294423	0.226639	1.75388	0.416053	0.510382	conserved protein, unknown function	protein_coding_gene
PF3D7_1030100	22935.2	0.294271	0.235236	1.74099	0.418743	0.512884	pre-mRNA-splicing factor ATP-dependent RNA helicase PRP22, putative	protein_coding_gene
PF3D7_1326200	724.616	0.293895	0.289106	1.14722	0.563488	0.644838	conserved Plasmodium protein, unknown function	protein_coding_gene
PF3D7_1344600	3548.62	0.292963	0.259407	2.0297	0.362457	0.45978	lipoyl synthase	protein_coding_gene
PF3D7_0103000	853.328	0.292597	0.23591	6.46875	0.0393849	0.0849497	vacuolar protein sorting-associated protein VTA1, putative	protein_coding_gene
PF3D7_1135600	2322.59	0.292343	0.198976	21.5287	2.11397e-05	0.000224453	condensin-2 complex subunit D3, putative	protein_coding_gene
PF3D7_0215800	5579.88	0.292033	0.238885	1.53474	0.464232	0.555111	origin recognition complex subunit 5	protein_coding_gene
PF3D7_0521500	2690	0.291896	0.179589	2.66245	0.264153	0.360726	ribosomal large subunit pseudouridylate synthase, putative	protein_coding_gene
PF3D7_1333200	7378.1	0.291852	0.227174	19.6777	5.33374e-05	0.000471707	ubiquitin-activating enzyme	protein_coding_gene
PF3D7_1306300	2084.26	0.291842	0.234997	10.6307	0.00491564	0.0172693	SAM dependent methyltransferase, putative	protein_coding_gene
PF3D7_0405100	13542.6	0.291703	0.229374	2.5429	0.280425	0.378173	protein transport protein Sec24B, putative	protein_coding_gene
PF3D7_1018300	11495.2	0.291617	0.212278	3.40364	0.182352	0.272217	peptidase, putative	protein_coding_gene
PF3D7_0305600	16815.2	0.29153	0.195606	11.8599	0.00265862	0.0108433	DNA-(apurinic or apyrimidinic site) endonuclease	protein_coding_gene
PF3D7_1363500	2142.37	0.291485	0.255389	6.54318	0.037946	0.0827102	CCR4 domain-containing protein 2, putative	protein_coding_gene
PF3D7_1310200	363.803	0.289681	0.618989	0.232585	0.890215	0.913257	conserved Plasmodium protein, unknown function	protein_coding_gene
PF3D7_1402300	19104.6	0.289255	0.196007	3.10498	0.21172	0.304586	26S proteasome regulatory subunit RPN6	protein_coding_gene
PF3D7_0308000	5380.63	0.289164	0.199417	2.10089	0.349783	0.44797	DNA polymerase delta small subunit, putative	protein_coding_gene
PF3D7_0703000	938.187	0.28904	0.232322	15.5067	0.000429305	0.00256496	conserved Plasmodium protein, unknown function	protein_coding_gene
PF3D7_0811000	3148.89	0.288527	0.178564	6.57367	0.037372	0.0817681	cullin-1, putative	protein_coding_gene
PF3D7_1213000	5.3635	0.288519	1.99908	4.31125	0.115831	NA	non-coding RNA	ncRNA_gene
PF3D7_1441400	13886.8	0.28817	0.221475	1.69269	0.428979	0.52234	FACT complex subunit SSRP1, putative	protein_coding_gene
PF3D7_0609900	2318.59	0.288041	0.224424	13.3422	0.00126701	0.00612506	conserved Plasmodium protein, unknown function	protein_coding_gene
PF3D7_0933000	7407.46	0.28777	0.194661	8.45201	0.0146106	0.0400731	CSTF domain-containing protein, putative	protein_coding_gene
PF3D7_0518200	6552.15	0.287678	0.318516	2.61293	0.270775	0.36822	SWIB/MDM2 domain-containing protein	protein_coding_gene
PF3D7_1235400	3492.46	0.286841	0.291473	1.95106	0.376992	0.474023	tetQ family GTPase, putative	protein_coding_gene
PF3D7_1228100	595.03	0.286841	0.304123	4.81413	0.0900795	0.158272	leucine-rich repeat protein	protein_coding_gene
PF3D7_1446700	4830.3	0.286756	0.189118	3.22694	0.199195	0.291002	conserved Plasmodium protein, unknown function	protein_coding_gene
PF3D7_1028500	8546.98	0.286029	0.25322	2.82401	0.243655	0.338521	partial CSTF domain-containing protein, putative	protein_coding_gene
PF3D7_0622100	227.911	0.28543	0.312601	2.2541	0.323988	0.422543	conserved Plasmodium protein, unknown function	protein_coding_gene
PF3D7_1301200	17.6023	0.285381	0.774145	0.370006	0.831102	0.866308	GBPH2 protein	protein_coding_gene
PF3D7_1438500	5286.16	0.28527	0.259943	1.47019	0.479459	0.568475	cleavage and polyadenylation specificity factor subunit 3, putative	protein_coding_gene
PF3D7_0729200	2815.02	0.285205	0.18387	15.5391	0.000422414	0.00253253	1-cys peroxiredoxin	protein_coding_gene
PF3D7_0209000	141.152	0.284856	0.494393	5.55572	0.0621714	0.11982	6-cysteine protein P230	protein_coding_gene
PF3D7_0913600	3435.13	0.284745	0.229781	9.93753	0.00695174	0.0227146	conserved Plasmodium protein, unknown function	protein_coding_gene
PF3D7_1451200	39478.7	0.284738	0.222945	4.04106	0.132585	0.212793	conserved Plasmodium protein, unknown function	protein_coding_gene
PF3D7_1455900	1814.78	0.284554	0.181275	2.5078	0.285389	0.383383	polyprenol reductase	protein_coding_gene
PF3D7_0933400	1140.61	0.283901	0.204817	2.20961	0.331276	0.430212	conserved Plasmodium protein, unknown function	protein_coding_gene
PF3D7_1121700	15826.3	0.283664	0.2328	6.34577	0.0418826	0.0888294	protein GCN20	protein_coding_gene
PF3D7_1225100	3546.92	0.283356	0.284062	8.33043	0.0155264	0.0420077	isoleucine--tRNA ligase, putative	protein_coding_gene
PF3D7_API04300	0.920907	0.283352	3.98799	1.23743	0.538636	NA	DNA-directed RNA polymerase subunit beta', putative	protein_coding_gene
PF3D7_0515100	4139.71	0.283331	0.202654	9.37138	0.00922636	0.0284292	rhomboid protease ROM9	protein_coding_gene
PF3D7_1318100	3368.68	0.283266	0.236361	2.71686	0.257064	0.353744	ferredoxin	protein_coding_gene
PF3D7_1432000	5430.14	0.283198	0.172194	8.24214	0.0162272	0.043451	syntaxin, Qa-SNARE family	protein_coding_gene
PF3D7_0730500	12441.4	0.282606	0.202417	36.7206	1.06223e-08	7.45281e-07	conserved Plasmodium protein, unknown function	protein_coding_gene
PF3D7_1212100	7236.68	0.282439	0.173327	4.41495	0.109978	0.184542	peripheral plastid protein 1, putative	protein_coding_gene
PF3D7_0912400	30937.9	0.282427	0.175703	10.346	0.00566741	0.0192699	alkaline phosphatase, putative	protein_coding_gene
PF3D7_0927300	5898.99	0.2819	0.168371	7.75594	0.0206927	0.0521791	fumarate hydratase	protein_coding_gene
PF3D7_1023800	258.852	0.28187	0.327778	1.23252	0.539961	0.623827	conserved Plasmodium protein, unknown function	protein_coding_gene
PF3D7_1427700	983.288	0.281746	0.234135	2.53629	0.281353	0.379214	conserved Plasmodium protein, unknown function	protein_coding_gene
PF3D7_0802500	6112.71	0.281487	0.221307	8.36199	0.0152833	0.0414565	inositol 5-phosphatase, putative	protein_coding_gene
PF3D7_1200200	1043.47	0.281429	0.297298	7.60164	0.0223524	0.0553427	rifin	protein_coding_gene
PF3D7_0412000	6031.7	0.281156	0.213084	14.6217	0.000668264	0.00369109	LITAF-like zinc finger protein, putative	protein_coding_gene
PF3D7_1443700	4454.43	0.281128	0.205201	6.62031	0.0365105	0.0801774	dephospho-CoA kinase	protein_coding_gene
PF3D7_1457400	4458.25	0.281122	0.221029	13.2529	0.00132489	0.00631665	conserved Plasmodium protein, unknown function	protein_coding_gene
PF3D7_0714300	6386.32	0.280905	0.185673	16.0318	0.000330163	0.00206282	palmitoyltransferase DHHC4, putative	protein_coding_gene
PF3D7_1243000	2481.68	0.280203	0.175507	2.64296	0.26674	0.363781	syntaxin-16, putative	protein_coding_gene
PF3D7_0619500	7565.26	0.280198	0.231539	1.8183	0.402866	0.498566	acyl-CoA synthetase	protein_coding_gene
PF3D7_1457600	3843.98	0.279962	0.188885	3.7765	0.151336	0.235251	conserved Plasmodium protein, unknown function	protein_coding_gene
PF3D7_1331700	26768.7	0.279847	0.191988	19.7994	5.01897e-05	0.000453981	glutamine--tRNA ligase, putative	protein_coding_gene
PF3D7_1250400	1324.8	0.279254	0.280622	15.6317	0.000403293	0.00244329	conserved Plasmodium protein, unknown function	protein_coding_gene
PF3D7_1215900	2277.07	0.278991	0.267373	1.88146	0.390343	0.486126	serpentine receptor 10	protein_coding_gene
PF3D7_0820500	8246.99	0.278628	0.306541	6.72166	0.0347064	0.0771385	protein transport protein YIF1, putative	protein_coding_gene
PF3D7_1104300	13608.6	0.278608	0.232172	6.79644	0.0334327	0.0748392	conserved Plasmodium protein, unknown function	protein_coding_gene
PF3D7_1136700	1519.82	0.278531	0.213662	7.10079	0.0287133	0.0669419	armadillo-interacting protein AIP	protein_coding_gene
PF3D7_1003600	2077.26	0.278391	0.312753	7.93482	0.0189224	0.0489756	inner membrane complex protein 1c, putative	protein_coding_gene
PF3D7_1323700	11897.8	0.278257	0.782086	1.52147	0.467322	0.557522	glideosome associated protein with multiple membrane spans 1	protein_coding_gene
PF3D7_1249600	1225.06	0.278151	0.226424	10.4095	0.00549048	0.0188709	leucine-rich repeat protein	protein_coding_gene
PF3D7_1019200	12.0932	0.278082	1.44785	0.0797163	0.960926	NA	conserved Plasmodium protein, unknown function	protein_coding_gene
PF3D7_1333500	4957.49	0.276505	0.218378	1.6038	0.448475	0.541176	conserved Plasmodium protein, unknown function	protein_coding_gene
PF3D7_0919100	24228.8	0.276434	0.1664	6.86819	0.0322545	0.072938	DnaJ protein, putative	protein_coding_gene
PF3D7_0527100	26981.1	0.276254	0.20009	1.92508	0.381921	0.478507	ubiquitin-conjugating enzyme E2 13	protein_coding_gene
PF3D7_0614400	7357.87	0.276241	0.218111	1.73259	0.420506	0.514594	pre-mRNA-splicing factor CWF7, putative	protein_coding_gene
PF3D7_1230700	28593.5	0.275888	0.16323	17.6194	0.000149282	0.00109165	protein transport protein SEC13	protein_coding_gene
PF3D7_1131900	185.346	0.275713	0.411713	12.6914	0.00175424	0.00787208	conserved Plasmodium protein, unknown function	protein_coding_gene
PF3D7_1017900	14863	0.275441	0.207106	5.22432	0.0733759	0.136206	26S proteasome regulatory subunit p55, putative	protein_coding_gene
PF3D7_1221000	11056.8	0.275304	0.263371	8.91726	0.0115782	0.0339819	histone-lysine N-methyltransferase, H3 lysine-4 specific	protein_coding_gene
PF3D7_1135900	28224.4	0.275232	0.230965	5.98902	0.0500611	0.101729	3-oxo-5-alpha-steroid 4-dehydrogenase, putative	protein_coding_gene
PF3D7_1205400	4919.78	0.275167	0.229384	4.05999	0.131336	0.211106	kelch domain-containing protein, putative	protein_coding_gene
PF3D7_1325300	45.5468	0.275042	0.552659	0.254208	0.880642	0.906302	conserved Plasmodium protein, unknown function	protein_coding_gene
PF3D7_0320400	247.25	0.274937	0.363449	3.72739	0.155099	0.240093	oocyst capsule protein Cap380	protein_coding_gene
PF3D7_1123000	21572.5	0.274815	0.190575	23.6184	7.43591e-06	9.57997e-05	conserved Plasmodium protein, unknown function	protein_coding_gene
PF3D7_0920500	2305.44	0.274685	0.20144	2.85043	0.240456	0.335334	ADP-ribosylation factor, putative	protein_coding_gene
PF3D7_0110100	5318.08	0.274635	0.21906	2.8556	0.239836	0.334649	selenocysteine-specific elongation factor, putative	protein_coding_gene
PF3D7_0909100	305.957	0.274049	0.252564	2.62078	0.269715	0.367163	conserved Plasmodium membrane protein, unknown function	protein_coding_gene
PF3D7_0815300	2953.85	0.274005	0.23819	1.42216	0.491114	0.579514	FAD-dependent monooxygenase, putative	protein_coding_gene
PF3D7_1447200	9306.34	0.273734	0.213648	5.19947	0.0742934	0.137131	conserved protein, unknown function	protein_coding_gene
PF3D7_0914000	3037.37	0.273442	0.303146	7.05321	0.0294046	0.0679736	pseudouridylate synthase, putative	protein_coding_gene
PF3D7_1451000	4950.42	0.273403	0.255877	6.52315	0.038328	0.083298	conserved Plasmodium protein, unknown function	protein_coding_gene
PF3D7_1232100	24292.1	0.273153	0.281128	0.971438	0.615255	0.689638	60 kDa chaperonin	protein_coding_gene
PF3D7_1223000	643.38	0.272793	0.357002	0.933034	0.627183	0.700275	conserved Plasmodium protein, unknown function	protein_coding_gene
PF3D7_0107100	1853.76	0.272369	0.241529	1.67356	0.433102	0.525635	conserved protein, unknown function	protein_coding_gene
PF3D7_0512500	2696.84	0.272303	0.202238	17.3761	0.00016859	0.00121164	conserved Plasmodium protein, unknown function	protein_coding_gene
PF3D7_0816100	1455.19	0.272194	0.309588	2.6141	0.270617	0.368106	phosphopantothenoylcysteine decarboxylase, putative	protein_coding_gene
PF3D7_0813000	8616.29	0.271887	0.214554	2.06277	0.356512	0.453902	protein KIC7	protein_coding_gene
PF3D7_0525600	3850.37	0.271776	0.18131	2.50372	0.285973	0.384058	RNA methyltransferase, putative	protein_coding_gene
PF3D7_0515000	18724.7	0.271278	0.199514	2.32819	0.312205	0.411413	pre-mRNA-splicing factor CWC2, putative	protein_coding_gene
PF3D7_1212800	7501.28	0.271266	0.20084	11.2103	0.00367881	0.0137909	succinate dehydrogenase [ubiquinone] iron-sulfur subunit, mitochondrial	protein_coding_gene
PF3D7_0831750	222.486	0.27105	0.397805	0.503792	0.777325	0.823144	Plasmodium exported protein (PHISTa), unknown function, pseudogene	pseudogene
PF3D7_1453200	1655.54	0.270863	0.208804	4.75092	0.0929716	0.161876	conserved Plasmodium protein, unknown function	protein_coding_gene
PF3D7_1030400	345.836	0.270156	0.248357	1.26184	0.532102	0.617496	conserved protein, unknown function	protein_coding_gene
PF3D7_1040700	1.09886	0.269773	3.60121	1.06785	0.586299	NA	rifin	protein_coding_gene
PF3D7_0409900	127.661	0.269588	0.439207	0.455859	0.79618	0.837296	actin-like protein, putative	protein_coding_gene
PF3D7_1110500	8438.94	0.269435	0.202635	3.51327	0.172625	0.261302	vacuolar protein sorting-associated protein 35, putative	protein_coding_gene
PF3D7_1438700	11248.6	0.269364	0.172494	2.8459	0.241003	0.335556	DNA primase small subunit	protein_coding_gene
PF3D7_1118300	32264.4	0.269284	0.235679	1.38947	0.499207	0.587133	insulinase, putative	protein_coding_gene
PF3D7_0619900	4252.17	0.268689	0.192102	4.96595	0.0834945	0.149381	splicing factor 3A subunit 2, putative	protein_coding_gene
PF3D7_1316500	8237.75	0.268659	0.255121	3.13668	0.208391	0.300964	pre-mRNA-processing factor 40, putative	protein_coding_gene
PF3D7_1210500	60.3697	0.268629	0.563369	0.782613	0.676173	0.742689	conserved Plasmodium protein, unknown function	protein_coding_gene
PF3D7_1309300	9396.76	0.268523	0.247433	4.80614	0.0904398	0.158744	U4/U6 small nuclear ribonucleoprotein PRP3, putative	protein_coding_gene
PF3D7_1332600	17984.1	0.268235	0.199879	9.43718	0.00892774	0.027723	DNA-(apurinic or apyrimidinic site) lyase 1	protein_coding_gene
PF3D7_0711400	13365.3	0.267935	0.196542	1.98896	0.369916	0.467186	histone deacetylase complex subunit SAP18, putative	protein_coding_gene
PF3D7_0516600	11857.4	0.267316	0.286317	10.088	0.00644801	0.0214465	sporozoite surface antigen MB2	protein_coding_gene
PF3D7_0807800	25733.6	0.267224	0.190835	8.01118	0.0182136	0.0475678	26S proteasome regulatory subunit RPN10, putative	protein_coding_gene
PF3D7_0826500	22182.2	0.266776	0.224897	7.28671	0.0261644	0.0621719	ubiquitin conjugation factor E4 B, putative	protein_coding_gene
PF3D7_1360700	8195.36	0.266662	0.266926	2.32436	0.312803	0.411679	E3 SUMO-protein ligase PIAS, putative	protein_coding_gene
PF3D7_0405200	5274.41	0.266648	0.179719	8.03597	0.0179892	0.0471004	protein CERLI2	protein_coding_gene
PF3D7_1338100	32609.2	0.266572	0.215845	7.36836	0.0251178	0.0602619	26S proteasome regulatory subunit RPN3, putative	protein_coding_gene
PF3D7_1124200	3361.49	0.266351	0.190862	2.29172	0.31795	0.417289	thioredoxin-like protein, putative	protein_coding_gene
PF3D7_1234900	16761.6	0.266273	0.175181	4.22664	0.120836	0.198287	CHCH domain-containing protein, putative	protein_coding_gene
PF3D7_1416100	3796.23	0.266128	0.266083	0.999583	0.606657	0.682654	protein SEY1, putative	protein_coding_gene
PF3D7_1001700	7634.71	0.265886	0.212551	4.54826	0.102887	0.175028	Plasmodium exported protein (PHISTc), unknown function	protein_coding_gene
PF3D7_1212500	18886.2	0.265674	0.187566	17.7891	0.000137132	0.00102004	glycerol-3-phosphate 1-O-acyltransferase	protein_coding_gene
PF3D7_1109100	451.634	0.265513	0.429458	0.415228	0.812521	0.850869	conserved Plasmodium protein, unknown function	protein_coding_gene
PF3D7_0525800	2374.11	0.265463	0.403875	0.922926	0.630361	0.703079	inner membrane complex protein 1g, putative	protein_coding_gene
PF3D7_0819800	1133	0.264797	0.266088	23.0731	9.76648e-06	0.000120446	conserved Plasmodium protein, unknown function	protein_coding_gene
PF3D7_1230300	349.885	0.26467	0.276805	12.9039	0.00157742	0.00724773	subpellicular microtubule protein 2, putative	protein_coding_gene
PF3D7_1369600	6776.61	0.264562	0.188749	9.57801	0.00832074	0.0261576	conserved Plasmodium protein, unknown function	protein_coding_gene
PF3D7_0803500	3088.3	0.264019	0.318318	4.61505	0.099507	0.170734	AAA family ATPase, putative	protein_coding_gene
PF3D7_1414000	20021.2	0.263831	0.195305	4.31561	0.115579	0.191797	26S proteasome regulatory subunit RPN13, putative	protein_coding_gene
PF3D7_0721200	2397.67	0.263396	0.279578	0.975946	0.61387	0.688531	conserved Plasmodium protein, unknown function	protein_coding_gene
PF3D7_1427500	9549.18	0.263372	0.167211	5.23261	0.0730724	0.135762	DNA mismatch repair protein MSH2, putative	protein_coding_gene
PF3D7_0530500	91.4718	0.263072	0.372639	0.737221	0.691695	0.754629	conserved Plasmodium membrane protein, unknown function	protein_coding_gene
PF3D7_0511800	32125.3	0.262129	0.2142	8.29843	0.0157768	0.0425522	inositol-3-phosphate synthase	protein_coding_gene
PF3D7_0413900	12748.1	0.2619	0.244922	1.37909	0.501805	0.589183	ubiquitin carboxyl-terminal hydrolase 13, putative	protein_coding_gene
PF3D7_1145000	497.505	0.261889	0.222454	6.27376	0.043418	0.0912658	conserved Plasmodium protein, unknown function	protein_coding_gene
PF3D7_1472100	6096.2	0.26164	0.172247	3.53552	0.170715	0.25957	protein transport protein YIP1, putative	protein_coding_gene
PF3D7_0916500	8739.06	0.26118	0.185378	4.20743	0.122002	0.199696	ubiquitin fusion degradation protein 1	protein_coding_gene
PF3D7_1220100	6825.16	0.260988	0.283402	1.24595	0.536347	0.621588	pre-mRNA-processing factor 17, putative	protein_coding_gene
PF3D7_1226100	666.583	0.260986	0.272195	1.27506	0.528598	0.614803	haloacid dehalogenase-like hydrolase, putative	protein_coding_gene
PF3D7_1369000	4331.01	0.260949	0.207849	10.0328	0.00662842	0.0218784	glycosylphosphatidylinositol anchor attachment 1 protein, putative	protein_coding_gene
PF3D7_0420600	3460.28	0.260636	0.180679	13.5653	0.00113329	0.00563066	conserved Plasmodium protein, unknown function	protein_coding_gene
PF3D7_1133800	17761.8	0.260198	0.220253	2.04567	0.359575	0.456681	RNA (uracil-5-)methyltransferase, putative	protein_coding_gene
PF3D7_1119400	9932.53	0.25997	0.218793	21.6909	1.94934e-05	0.000210793	ubiquitin-protein ligase, putative	protein_coding_gene
PF3D7_0210700	915.109	0.259969	0.232769	3.02009	0.2209	0.314309	syntaxin, Qa-SNARE family	protein_coding_gene
PF3D7_0922400	1868.78	0.259956	0.266036	9.93179	0.00697172	0.0227598	para-aminobenzoic acid synthetase	protein_coding_gene
PF3D7_1314400	269.577	0.259847	0.279781	0.865049	0.648869	0.719549	conserved protein, unknown function	protein_coding_gene
PF3D7_0523400	14276.7	0.25948	0.196773	14.5033	0.000709011	0.00386679	DnaJ protein, putative	protein_coding_gene
PF3D7_1022400	35952.6	0.259343	0.253288	1.47651	0.477947	0.567071	serine/arginine-rich splicing factor 4	protein_coding_gene
PF3D7_1312000	782.558	0.258672	0.253487	1.98716	0.370248	0.467492	malonyl CoA-acyl carrier protein transacylase	protein_coding_gene
PF3D7_0309200	14529.9	0.25845	0.22378	30.6129	2.2516e-07	6.6047e-06	serine/threonine protein kinase ARK2, putative	protein_coding_gene
PF3D7_1366400	12755.4	0.258298	0.266605	10.9321	0.00422796	0.015306	rhoptry protein RHOP148	protein_coding_gene
PF3D7_1352500	46317.5	0.258203	0.19531	17.1761	0.000186317	0.00130372	thioredoxin-related protein, putative	protein_coding_gene
PF3D7_1442200	3904.82	0.258137	0.22088	16.3017	0.000288489	0.0018657	GTP-binding protein YihA2	protein_coding_gene
PF3D7_0203000	5040.41	0.257841	0.25677	31.4441	1.48595e-07	5.12583e-06	repetitive organellar protein, putative	protein_coding_gene
PF3D7_1439800	13892.1	0.257794	0.194466	6.34648	0.0418676	0.0888294	vesicle-associated membrane protein, putative	protein_coding_gene
PF3D7_1108000	14567.2	0.257579	0.248421	1.21679	0.544224	0.627496	IWS1-like protein, putative	protein_coding_gene
PF3D7_0927500	82.4147	0.257513	0.452769	4.33558	0.11443	0.190545	dynein light chain, putative	protein_coding_gene
PF3D7_0215400	14915.6	0.257485	0.304029	1.33432	0.513165	0.600079	conserved Plasmodium protein, unknown function	protein_coding_gene
PF3D7_0418100	7474.36	0.257457	0.225199	8.91567	0.0115874	0.0339898	protein SOC1, putative	protein_coding_gene
PF3D7_1034000	6199.02	0.257188	0.239316	2.17386	0.33725	0.436006	Sec1 family protein, putative	protein_coding_gene
PF3D7_1365300	2261.8	0.257065	0.198222	9.02806	0.0109542	0.0326244	conserved Plasmodium protein, unknown function	protein_coding_gene
PF3D7_1203000	5493.5	0.256342	0.29155	16.3251	0.000285141	0.00185489	origin recognition complex subunit 1	protein_coding_gene
PF3D7_1334000	1213.84	0.256327	0.200275	3.20074	0.201822	0.293683	RING zinc finger protein, putative	protein_coding_gene
PF3D7_1219100	18379.7	0.256118	0.281781	2.98918	0.224341	0.318419	clathrin heavy chain, putative	protein_coding_gene
PF3D7_0911700	7340.12	0.255957	0.283871	3.21364	0.200524	0.292203	GTP-binding protein, putative	protein_coding_gene
PF3D7_1417800	41916.3	0.255876	0.180502	5.97407	0.0504369	0.102292	DNA replication licensing factor MCM2	protein_coding_gene
PF3D7_0511600	362.955	0.255495	0.413766	0.464394	0.79279	0.835223	apical rhoptry neck protein	protein_coding_gene
PF3D7_0906200	1169.59	0.254744	0.273535	2.0732	0.354658	0.45254	conserved Plasmodium protein, unknown function	protein_coding_gene
PF3D7_0820300	5075.38	0.254622	0.202089	2.04872	0.359027	0.456209	conserved Plasmodium protein, unknown function	protein_coding_gene
PF3D7_1320400	2318.74	0.254586	0.256524	2.93468	0.230538	0.325171	type I signal peptidase	protein_coding_gene
PF3D7_0507400	220.012	0.254298	0.343187	0.602699	0.739819	0.79428	subtilisin propeptide-like protein	protein_coding_gene
PF3D7_0630600	13530.7	0.25398	0.191568	10.819	0.00447388	0.015991	deubiquitinating enzyme MINDY, putative	protein_coding_gene
PF3D7_0305100	11732.3	0.253875	0.256964	20.9385	2.83962e-05	0.000284071	conserved Plasmodium protein, unknown function	protein_coding_gene
PF3D7_0820800	1785.29	0.253867	0.238484	5.3788	0.0679218	0.128143	conserved Plasmodium protein, unknown function	protein_coding_gene
PF3D7_0530800	1549.9	0.253691	0.322007	0.625497	0.731434	0.788539	CPW-WPC family protein	protein_coding_gene
PF3D7_1248900	28418.4	0.253547	0.19971	12.3815	0.00204826	0.00887341	26S protease regulatory subunit 8, putative	protein_coding_gene
PF3D7_1303700	938.739	0.253541	0.237992	12.7037	0.00174354	0.00783085	tetratricopeptide repeat protein, putative	protein_coding_gene
PF3D7_1233300	8161.33	0.253516	0.268425	17.7003	0.000143358	0.00105727	pentatricopeptide repeat domain-containing protein 2, putative	protein_coding_gene
PF3D7_0823300	20568.3	0.253162	0.179305	27.6797	9.75949e-07	2.01076e-05	histone acetyltransferase GCN5	protein_coding_gene
PF3D7_1249300	12476.4	0.253048	0.259384	1.49491	0.473569	0.562519	protein phosphatase PPM4, putative	protein_coding_gene
PF3D7_1307200	5928.87	0.252812	0.194891	1.68693	0.430216	0.522988	DnaJ protein, putative	protein_coding_gene
PF3D7_0824300	2892.31	0.252733	0.230433	3.04637	0.218016	0.311282	GTP-binding protein Obg2, putative	protein_coding_gene
PF3D7_1428200	5630.57	0.252722	0.193756	1.84536	0.397453	0.493797	major facilitator superfamily domain-containing protein, putative	protein_coding_gene
PF3D7_1209600	379.048	0.252628	0.242391	7.4423	0.0242061	0.0587429	porphobilinogen deaminase	protein_coding_gene
PF3D7_0807100	3473.9	0.252296	0.251302	14.736	0.000631132	0.00352348	DNA helicase PSH3	protein_coding_gene
PF3D7_0820000	24462.7	0.252264	0.253482	5.13593	0.0766915	0.140502	Snf2-related CBP activator, putative	protein_coding_gene
PF3D7_0209700	7916.55	0.252263	0.248234	2.86777	0.238381	0.333156	RING zinc finger protein, putative	protein_coding_gene
PF3D7_1320000	12179.3	0.252123	0.21795	1.73245	0.420536	0.514594	golgi protein 1	protein_coding_gene
PF3D7_1239400	29.4294	0.252112	0.658389	1.13718	0.566322	0.647226	conserved protein, unknown function	protein_coding_gene
PF3D7_1231600	14906.2	0.251885	0.219637	7.84188	0.0198224	0.0506736	pre-mRNA-splicing factor ATP-dependent RNA helicase PRP2, putative	protein_coding_gene
PF3D7_0410800	9456.77	0.251669	0.185801	28.1823	7.59105e-07	1.6843e-05	conserved Plasmodium protein, unknown function	protein_coding_gene
PF3D7_0801800	60189.2	0.251483	0.254555	2.35732	0.307691	0.406623	mannose-6-phosphate isomerase, putative	protein_coding_gene
PF3D7_0828300	4075.39	0.250236	0.232124	20.0891	4.3421e-05	0.000403295	conserved protein, unknown function	protein_coding_gene
PF3D7_1226000	964.197	0.249955	0.28542	3.52861	0.171306	0.259913	conserved protein, unknown function	protein_coding_gene
PF3D7_0928400	569.343	0.249332	0.380312	1.68971	0.429619	0.522509	conserved protein, unknown function	protein_coding_gene
PF3D7_1339900	5362.39	0.24868	0.195685	9.90266	0.007074	0.0229983	ABC transporter B family member 5, putative	protein_coding_gene
PF3D7_1024900	4081.18	0.248667	0.212595	11.2569	0.00359414	0.0135912	conserved Plasmodium protein, unknown function	protein_coding_gene
PF3D7_0420500	129.867	0.248639	0.464061	0.32558	0.849769	0.881519	conserved Plasmodium protein, unknown function	protein_coding_gene
PF3D7_0312200	1745.91	0.24831	0.250233	7.80917	0.0201493	0.0512318	tetratricopeptide repeat protein, putative	protein_coding_gene
PF3D7_0504300	203.575	0.247696	0.313972	2.42214	0.297878	0.396662	conserved Plasmodium protein, unknown function	protein_coding_gene
PF3D7_1472300	4049.87	0.247428	0.197423	1.86449	0.393668	0.489446	conserved protein, unknown function	protein_coding_gene
PF3D7_1362400	10449.8	0.247189	0.235445	6.50988	0.0385832	0.0836426	calpain	protein_coding_gene
PF3D7_1326300	10930.4	0.246937	0.202721	1.95068	0.377063	0.474023	RNA-binding protein, putative	protein_coding_gene
PF3D7_0802200	78660.6	0.246935	0.190973	1.69323	0.428865	0.522324	1-cys peroxiredoxin	protein_coding_gene
PF3D7_1223600	1623.71	0.246691	0.18834	11.601	0.00302608	0.011966	conserved Plasmodium protein, unknown function	protein_coding_gene
PF3D7_1313200	1438.72	0.246202	0.193401	2.26897	0.321588	0.420364	methionyl-tRNA formyltransferase, putative	protein_coding_gene
PF3D7_0605800	22685.1	0.246126	0.184798	31.3921	1.52509e-07	5.17533e-06	DNA repair protein RAD50, putative	protein_coding_gene
PF3D7_1338400	2371.28	0.245992	0.222675	5.27104	0.0716816	0.133821	SprT-like domain-containing protein, putative	protein_coding_gene
PF3D7_1032200	118.546	0.245317	0.407023	2.41923	0.298312	0.397036	conserved Plasmodium protein, unknown function	protein_coding_gene
PF3D7_1201800	2583.14	0.245241	0.176981	2.51683	0.284104	0.382142	cytochrome c oxidase assembly protein COX19, putative	protein_coding_gene
PF3D7_1349300	4618.01	0.244768	0.178631	27.0992	1.30464e-06	2.5275e-05	tyrosine kinase-like protein	protein_coding_gene
PF3D7_0828400	1268.62	0.244419	0.234899	6.31415	0.0425501	0.0898414	mitochondrial inner membrane protein OXA1, putative	protein_coding_gene
PF3D7_0910200	18706.1	0.243724	0.178131	30.2972	2.63659e-07	7.20484e-06	conserved Plasmodium protein, unknown function	protein_coding_gene
PF3D7_1225800	29382.8	0.242826	0.243334	1.79687	0.407207	0.502189	ubiquitin-activating enzyme E1	protein_coding_gene
PF3D7_1216900	41471.6	0.242683	0.253738	11.1851	0.00372545	0.0138955	DNA-binding chaperone, putative	protein_coding_gene
PF3D7_0931000	3050.28	0.242681	0.18953	24.801	4.1166e-06	6.23131e-05	elongation factor Tu, putative	protein_coding_gene
PF3D7_0205300	305.941	0.242487	0.272625	3.84584	0.14618	0.228742	conserved Plasmodium protein, unknown function	protein_coding_gene
PF3D7_1437400	6700.17	0.242147	0.192059	2.44964	0.29381	0.39215	pantothenate kinase 2	protein_coding_gene
PF3D7_0729800	10.7448	0.242136	1.32999	0.672463	0.714458	NA	dynein light chain, putative	protein_coding_gene
PF3D7_1324100	5758.86	0.241873	0.187725	4.28012	0.117648	0.194708	conserved Plasmodium membrane protein, unknown function	protein_coding_gene
PF3D7_0713400	3348.63	0.241694	0.218236	1.24977	0.535322	0.620678	GPCR-like receptor SR25	protein_coding_gene
PF3D7_1106700	6727.62	0.241334	0.203968	11.8124	0.00272249	0.011069	DNA replication ATP-dependent helicase/nuclease DNA2, putative	protein_coding_gene
PF3D7_1324500	8285.96	0.240987	0.189892	1.60767	0.447609	0.540462	DEAD box helicase, putative	protein_coding_gene
PF3D7_1113100	19196.1	0.240849	0.233386	6.39003	0.0409659	0.0875287	protein tyrosine phosphatase	protein_coding_gene
PF3D7_1206200	45702.2	0.240783	0.257107	5.14225	0.0764496	0.140158	eukaryotic translation initiation factor 3 subunit C, putative	protein_coding_gene
PF3D7_1313100	306.78	0.240713	0.272157	8.43306	0.0147497	0.0403056	conserved Plasmodium protein, unknown function	protein_coding_gene
PF3D7_1334500	10573.3	0.240652	0.190469	5.75116	0.0563835	0.11114	MSP7-like protein	protein_coding_gene
PF3D7_1337200	10746.5	0.240651	0.295795	3.7309	0.154827	0.239887	1-deoxy-D-xylulose 5-phosphate synthase	protein_coding_gene
PF3D7_1209500	393.458	0.240635	0.318204	1.33472	0.51306	0.600079	cGMP-specific 3',5'-cyclic phosphodiesterase alpha	protein_coding_gene
PF3D7_0814200	191460	0.240513	0.233657	3.72873	0.154994	0.240003	DNA/RNA-binding protein Alba 1	protein_coding_gene
PF3D7_0321600	13178.8	0.24037	0.197617	2.15145	0.34105	0.439061	ATP-dependent RNA helicase DDX42, putative	protein_coding_gene
PF3D7_0616700	4789.41	0.240263	0.24519	0.980534	0.612463	0.687399	ras GTPAse, putative	protein_coding_gene
PF3D7_1023900	84839.2	0.24015	0.282815	14.4578	0.000725304	0.00392678	chromodomain-helicase-DNA-binding protein 1 homolog, putative	protein_coding_gene
PF3D7_0504800	14191.2	0.240082	0.253903	27.3736	1.13737e-06	2.2722e-05	conserved Plasmodium protein, unknown function	protein_coding_gene
PF3D7_1430600	3948.73	0.23994	0.217252	1.2358	0.539076	0.623081	endonuclease/exonuclease/phosphatase family protein, putative	protein_coding_gene
PF3D7_1004800	5807.17	0.239682	0.202691	13.0812	0.00144363	0.00678923	ADP,ATP carrier protein 2	protein_coding_gene
PF3D7_0302000	6087.52	0.239591	0.264141	1.49946	0.472495	0.562041	pre-mRNA-splicing factor PRP46, putative	protein_coding_gene
PF3D7_0721000	19770.9	0.239543	0.235442	25.0797	3.58115e-06	5.65147e-05	conserved Plasmodium membrane protein, unknown function	protein_coding_gene
PF3D7_0217900	21164.7	0.239224	0.179785	4.98732	0.0826069	0.148509	thioesterase/thiol ester dehydrase-isomerase, putative	protein_coding_gene
PF3D7_1455700	6805.12	0.238083	0.181013	4.83366	0.089204	0.157373	conserved Plasmodium protein, unknown function	protein_coding_gene
PF3D7_1473100	3282.29	0.237798	0.24173	1.62364	0.44405	0.537289	GTPase-activating protein, putative	protein_coding_gene
PF3D7_1467900	14751.5	0.237682	0.198678	35.5054	1.9503e-08	1.10065e-06	rab GTPase activator, putative	protein_coding_gene
PF3D7_1353300	13823.8	0.237657	0.253419	22.5389	1.27567e-05	0.000148172	conserved Plasmodium protein, unknown function	protein_coding_gene
PF3D7_1004300	18304.6	0.237505	0.23593	4.64852	0.0978559	0.168234	E3 ubiquitin-protein ligase, putative	protein_coding_gene
PF3D7_0616200	8189.75	0.236501	0.221869	1.12635	0.569399	0.649623	kinetochore protein NDC80, putative	protein_coding_gene
PF3D7_0823800	5644.24	0.236492	0.210968	1.57727	0.454464	0.546451	DnaJ protein, putative	protein_coding_gene
PF3D7_0904000	22842.1	0.235932	0.170332	3.26125	0.195807	0.287428	GTPase-activating protein, putative	protein_coding_gene
PF3D7_1349100	1537.99	0.235558	0.356791	4.97156	0.0832606	0.149042	nucleoside diphosphate hydrolase, putative	protein_coding_gene
PF3D7_1442700	3513.53	0.23536	0.249312	23.1198	9.54126e-06	0.00011823	conserved Plasmodium protein, unknown function	protein_coding_gene
PF3D7_0706300	82.1986	0.235078	0.51188	2.05166	0.3585	0.455775	conserved Plasmodium protein, unknown function	protein_coding_gene
PF3D7_1210200	52.3839	0.235024	0.522122	0.486889	0.783923	0.828711	zinc finger protein, putative	protein_coding_gene
PF3D7_1119300	13599.7	0.234852	0.284275	0.675881	0.713238	0.773419	splicing factor U2AF small subunit, putative	protein_coding_gene
PF3D7_1416300	4404.03	0.234508	0.23757	2.41609	0.298782	0.397359	N-acyl-phosphatidylethanolamine-hydrolyzing phospholipase D, putative	protein_coding_gene
PF3D7_1303800	38741.1	0.234193	0.2524	26.0815	2.17012e-06	3.71856e-05	conserved Plasmodium protein, unknown function	protein_coding_gene
PF3D7_0620600	141.098	0.23417	0.381366	2.60859	0.271364	0.368731	conserved Plasmodium protein, unknown function	protein_coding_gene
PF3D7_1463300	2454.34	0.234005	0.193346	4.10499	0.128414	0.207509	DNA polymerase alpha subunit B, putative	protein_coding_gene
PF3D7_0704400	8165.15	0.233868	0.183394	2.38767	0.303056	0.401805	phosphoinositide-binding protein, putative	protein_coding_gene
PF3D7_1003100	2650.39	0.233755	0.198996	3.56167	0.168497	0.257154	respiratory chain complex 4 associated protein 3	protein_coding_gene
PF3D7_0833400	25.9294	0.233576	0.856151	0.210794	0.899967	0.92126	rifin	protein_coding_gene
PF3D7_1427300	7215.88	0.233434	0.202853	3.07692	0.214711	0.307889	conserved Plasmodium protein, unknown function	protein_coding_gene
PF3D7_0314300	607.132	0.233381	0.319629	2.96047	0.227584	0.321879	DER1-like protein	protein_coding_gene
PF3D7_1250200	13321.6	0.233071	0.221533	5.06547	0.0794414	0.144267	CSC1-like protein, putative	protein_coding_gene
PF3D7_0624100	3110.91	0.232642	0.210097	7.06429	0.0292422	0.0677583	conserved protein, unknown function	protein_coding_gene
PF3D7_1034700	4667.34	0.232502	0.311268	8.71933	0.0127827	0.0362863	ADP-ribosylation factor, putative	protein_coding_gene
PF3D7_0709700	10181.9	0.23206	0.222367	14.5762	0.000683633	0.00376397	prodrug activation and resistance esterase	protein_coding_gene
PF3D7_1222100	7375.77	0.231809	0.171743	5.04837	0.0801238	0.1451	conserved Plasmodium protein, unknown function	protein_coding_gene
PF3D7_0216700	9233.39	0.231585	0.267404	22.7628	1.14057e-05	0.00013708	autophagy-related protein 11, putative	protein_coding_gene
PF3D7_1336700	12924.5	0.231455	0.195044	5.52902	0.0630069	0.120981	parasitophorous vacuolar protein 3, putative	protein_coding_gene
PF3D7_0710000	6840.29	0.231415	0.195136	24.2341	5.46547e-06	7.58736e-05	conserved Plasmodium protein, unknown function	protein_coding_gene
PF3D7_1317600	5377.13	0.231382	0.231954	3.04307	0.218376	0.311571	conserved Plasmodium protein, unknown function	protein_coding_gene
PF3D7_1216000	6425.28	0.231313	0.175461	8.74133	0.0126428	0.0360866	serine--tRNA ligase, putative	protein_coding_gene
PF3D7_1365600	265.88	0.231256	0.278081	0.99489	0.608082	0.683665	DNA topoisomerase 6 subunit B, putative	protein_coding_gene
PF3D7_1406300	11044	0.231215	0.170155	2.29996	0.316643	0.4161	glycerophosphodiester phosphodiesterase	protein_coding_gene
PF3D7_0413800	870.824	0.231199	0.215071	11.4753	0.00322232	0.0125133	50S ribosomal protein L10, putative	protein_coding_gene
PF3D7_1208900	58273.5	0.231111	0.188822	3.75227	0.153181	0.237569	protein phosphatase PPM11, putative	protein_coding_gene
PF3D7_1114700	32445.9	0.231107	0.245284	1.81089	0.404362	0.49963	cyclin-dependent-like kinase CLK3	protein_coding_gene
PF3D7_0632700	77.6588	0.230892	0.552025	2.33971	0.310412	0.409476	rifin	protein_coding_gene
PF3D7_1227600	15903.4	0.230828	0.1917	4.00259	0.13516	0.215923	kinetochore protein SPC24, putative	protein_coding_gene
PF3D7_1337800	636.733	0.230814	0.246684	1.1779	0.554909	0.637268	calcium-dependent protein kinase 5	protein_coding_gene
PF3D7_0510200	8405.57	0.230414	0.218391	1.81031	0.40448	0.499654	peptidyl-prolyl cis-trans isomerase	protein_coding_gene
PF3D7_1423300	2154.51	0.230165	0.313984	1.43723	0.487427	0.576212	serine/threonine protein phosphatase 7	protein_coding_gene
PF3D7_0526500	7294.72	0.230093	0.19176	19.176	6.85478e-05	0.000581536	conserved Plasmodium protein, unknown function	protein_coding_gene
PF3D7_1449500	7327.71	0.229918	0.22284	13.6308	0.00109676	0.0054859	AP2 domain transcription factor AP2-O5, putative	protein_coding_gene
PF3D7_0205100	1497.98	0.229699	0.250297	24.51	4.76118e-06	6.84766e-05	conserved Plasmodium protein, unknown function	protein_coding_gene
PF3D7_0504900	4499.47	0.229666	0.262638	4.01664	0.134214	0.214875	transmembrane protein TMEM222, putative	protein_coding_gene
PF3D7_1356800	3023.75	0.229586	0.227568	46.729	7.12747e-11	1.37059e-08	serine/threonine protein kinase ARK3, putative	protein_coding_gene
PF3D7_1013400	1404.26	0.229447	0.226479	2.45319	0.293289	0.391555	conserved Plasmodium protein, unknown function	protein_coding_gene
PF3D7_0615500	17180.5	0.229209	0.26686	8.63888	0.0133074	0.0374684	cdc2-related protein kinase 5	protein_coding_gene
PF3D7_0522500	1975.87	0.228666	0.185735	7.94014	0.0188721	0.0489134	50S ribosomal protein L17, apicoplast, putative	protein_coding_gene
PF3D7_0320800	13858.6	0.228362	0.17464	14.0248	0.000900626	0.00466672	ATP-dependent RNA helicase DDX6	protein_coding_gene
PF3D7_1120300	3933.01	0.228277	0.181583	1.58045	0.453742	0.545836	CorA-like Mg2+ transporter protein, putative	protein_coding_gene
PF3D7_1465100	1854.92	0.228269	0.221975	1.09126	0.579477	0.658636	conserved oligomeric Golgi complex subunit 6, putative	protein_coding_gene
PF3D7_1019000	27164.8	0.22814	0.258616	22.4659	1.32307e-05	0.000151978	eukaryotic translation initiation factor subunit eIF2A, putative	protein_coding_gene
PF3D7_1354900	4989.61	0.227686	0.182317	2.40453	0.300512	0.399248	conserved Plasmodium protein, unknown function	protein_coding_gene
PF3D7_0921300	2154.91	0.227518	0.25435	0.951065	0.621554	0.695647	RAP protein, putative	protein_coding_gene
PF3D7_1319100	3453.51	0.227374	0.272328	3.27934	0.194044	0.285728	ubiquitin carboxyl-terminal hydrolase MINDY, putative	protein_coding_gene
PF3D7_0937500	562.348	0.227144	0.213339	10.7367	0.00466193	0.0164546	rifin	protein_coding_gene
PF3D7_1200400	708.85	0.227037	0.258115	1.82284	0.401953	0.497838	erythrocyte membrane protein 1, PfEMP1	protein_coding_gene
PF3D7_1335400	3251.71	0.22696	0.259226	17.4233	0.000164658	0.00119233	reticulocyte binding protein 2 homologue a	protein_coding_gene
PF3D7_1464500	21782.2	0.226813	0.171425	27.8182	9.10648e-07	1.9142e-05	conserved Plasmodium membrane protein, unknown function	protein_coding_gene
PF3D7_0106300	53269.5	0.226583	0.173958	11.0095	0.00406737	0.0148403	calcium-transporting ATPase	protein_coding_gene
PF3D7_1208800	5408.39	0.226539	0.184224	10.7512	0.00462814	0.0163465	zinc finger protein, putative	protein_coding_gene
PF3D7_1365000	7645.8	0.226509	0.194175	2.18202	0.335877	0.434881	conserved Plasmodium protein, unknown function	protein_coding_gene
PF3D7_1138500	26994	0.226144	0.231162	3.33796	0.188439	0.279331	protein phosphatase PPM2	protein_coding_gene
PF3D7_0621000	4667.61	0.225831	0.231161	4.65303	0.0976352	0.168133	conserved Plasmodium protein, unknown function	protein_coding_gene
PF3D7_1143700	820.637	0.22567	0.22989	11.6538	0.0029472	0.0117176	conserved Plasmodium protein, unknown function	protein_coding_gene
PF3D7_1319000	1825.56	0.225659	0.26805	1.07972	0.582829	0.661779	conserved Plasmodium protein, unknown function	protein_coding_gene
PF3D7_1432900	799.174	0.225627	0.264901	1.55172	0.460309	0.551552	SF-assemblin, putative	protein_coding_gene
PF3D7_0719300	17151.2	0.225434	0.274169	0.697216	0.70567	0.766493	actin-related protein ARP6	protein_coding_gene
PF3D7_0317500	7766.47	0.225427	0.233432	24.8869	3.94344e-06	6.04276e-05	kinesin-5	protein_coding_gene
PF3D7_1475300	5055.85	0.224855	0.192256	1.99963	0.367947	0.46504	cytochrome c oxidase assembly protein COX11, putative	protein_coding_gene
PF3D7_0208500	4905.12	0.224415	0.188434	4.7827	0.091506	0.160236	acyl carrier protein	protein_coding_gene
PF3D7_1440100	9199.88	0.224342	0.215878	1.50427	0.47136	0.561307	cohesin complex subunit, putative	protein_coding_gene
PF3D7_1131600	1633.21	0.224262	0.232723	16.2782	0.000291893	0.00188028	kelch domain-containing protein, putative	protein_coding_gene
PF3D7_1421300	509.95	0.224098	0.226679	17.3712	0.000168999	0.00121164	conserved Plasmodium protein, unknown function	protein_coding_gene
PF3D7_1465000	8295.93	0.223434	0.207041	4.77308	0.0919471	0.160845	cytochrome c oxidase subunit 6A, putative	protein_coding_gene
PF3D7_0902000	3335.55	0.223292	0.288301	0.649301	0.72278	0.782133	serine/threonine protein kinase, FIKK family	protein_coding_gene
PF3D7_1245800	3750.68	0.223216	0.218904	1.56918	0.456306	0.548031	epsin-like protein, putative	protein_coding_gene
PF3D7_1149100	83063	0.222738	0.191962	1.72532	0.422039	0.515946	Plasmodium exported protein, unknown function	protein_coding_gene
PF3D7_0319500	18517.2	0.222574	0.171429	2.04118	0.360382	0.457483	RNA-binding protein, putative	protein_coding_gene
PF3D7_0816600	23846	0.222065	0.235055	1.68981	0.429598	0.522509	chaperone protein ClpB1	protein_coding_gene
PF3D7_1345200	4674.06	0.222036	0.256654	1.87581	0.391446	0.487033	rhomboid protease ROM6, putative	protein_coding_gene
PF3D7_0725400	1192.99	0.221784	0.484486	1.30074	0.521851	0.608592	conserved Plasmodium protein, unknown function	protein_coding_gene
PF3D7_0709300	9750.49	0.221641	0.25914	18.8808	7.94469e-05	0.000656828	mediator of RNA polymerase II transcription subunit 14, putative	protein_coding_gene
PF3D7_0708600	421.44	0.220822	0.270188	1.88256	0.390129	0.485976	inner membrane complex protein 1d, putative	protein_coding_gene
PF3D7_1222300	174378	0.220322	0.234882	5.60247	0.060735	0.117883	endoplasmin, putative	protein_coding_gene
PF3D7_0519800	15575.5	0.220196	0.236476	1.49594	0.473327	0.56236	EELM2 domain-containing protein, putative	protein_coding_gene
PF3D7_1345000	568.475	0.22007	0.226505	7.21737	0.0270874	0.0638393	RING zinc finger protein, putative	protein_coding_gene
PF3D7_0803000	8179.02	0.220003	0.250698	4.53702	0.103466	0.175842	peptidyl-prolyl cis-trans isomerase	protein_coding_gene
PF3D7_1224500	12529.4	0.219472	0.185683	7.19899	0.0273376	0.0643703	histone chaperone ASF1	protein_coding_gene
PF3D7_1024800	55954.2	0.219427	0.262567	0.699718	0.704787	0.765695	exported protein 3	protein_coding_gene
PF3D7_0106700	12303.5	0.219204	0.299983	11.2575	0.00359312	0.0135912	small ribosomal subunit assembling AARP2 protein	protein_coding_gene
PF3D7_1309200	14147.2	0.219181	0.234276	2.39112	0.302534	0.401318	protein phosphatase PPM6, putative	protein_coding_gene
PF3D7_1368500	638.973	0.219075	0.325769	0.630412	0.729638	0.78693	heptatricopeptide repeat-containing protein, putative	protein_coding_gene
PF3D7_0205900	60931.7	0.218939	0.17848	8.57983	0.0137061	0.0384036	26S proteasome regulatory subunit RPN1, putative	protein_coding_gene
PF3D7_0304300	2668.81	0.218349	0.235546	16.3179	0.000286165	0.00185489	conserved Plasmodium protein, unknown function	protein_coding_gene
PF3D7_1202900	58175	0.217843	0.271645	14.7201	0.000636156	0.00354391	high mobility group protein B1	protein_coding_gene
PF3D7_0415100	1208.28	0.217503	0.287992	0.798188	0.670928	0.738333	conserved protein, unknown function	protein_coding_gene
PF3D7_1226900	6240.48	0.21742	0.207381	20.4837	3.56473e-05	0.000342742	parasitophorous vacuolar protein 2	protein_coding_gene
PF3D7_1402400	3532.73	0.217413	0.210773	1.16601	0.558218	0.640226	zinc finger protein, putative	protein_coding_gene
PF3D7_1364300	9170.61	0.217163	0.242357	3.47808	0.175689	0.264937	pre-mRNA-splicing factor ATP-dependent RNA helicase PRP16	protein_coding_gene
PF3D7_0827200	182.436	0.217078	0.317053	3.3905	0.183553	0.27346	conserved Plasmodium protein, unknown function	protein_coding_gene
PF3D7_0628200	34085.4	0.216949	0.24153	17.5921	0.000151333	0.00110509	eukaryotic translation initiation factor 2-alpha kinase	protein_coding_gene
PF3D7_1003400	1068.8	0.216486	0.227123	15.5291	0.000424524	0.00253932	conserved Plasmodium protein, unknown function	protein_coding_gene
PF3D7_0603700	2190.55	0.216314	0.261849	1.02645	0.598563	0.675237	phenylalanine--tRNA ligase	protein_coding_gene
PF3D7_0822900	790.029	0.215932	0.480376	13.8183	0.000998607	0.00508311	PhIL1-interacting candidate PIC2	protein_coding_gene
PF3D7_0211700	8726.91	0.215836	0.220919	18.1407	0.000115026	0.000880847	tyrosine kinase-like protein, putative	protein_coding_gene
PF3D7_0802000	166511	0.215535	0.219665	7.39592	0.024774	0.0595495	glutamate dehydrogenase, putative	protein_coding_gene
PF3D7_0518500	23852.4	0.215356	0.173839	10.2392	0.0059783	0.0201293	ATP-dependent RNA helicase DDX23, putative	protein_coding_gene
PF3D7_1237000	10263.3	0.214521	0.189727	2.11256	0.347748	0.446024	SUMO-activating enzyme subunit 2	protein_coding_gene
PF3D7_0318900	13448.4	0.214342	0.195775	5.51742	0.0633734	0.121485	conserved protein, unknown function	protein_coding_gene
PF3D7_0403700	14809.2	0.214208	0.258705	3.32377	0.189781	0.281125	pre-mRNA-splicing factor CLF1, putative	protein_coding_gene
PF3D7_0713600	3048.2	0.214159	0.182384	5.91211	0.0520238	0.104774	ribosomal protein S5, mitochondrial, putative	protein_coding_gene
PF3D7_1032800	3243.72	0.21395	0.19559	1.874	0.391802	0.487242	leucine-rich repeat protein	protein_coding_gene
PF3D7_1334800	9661.86	0.213702	0.224755	6.02045	0.0492805	0.100579	MSP7-like protein	protein_coding_gene
PF3D7_1145700	862.918	0.213502	0.219154	0.994917	0.608074	0.683665	bicoid-interacting protein BIN3, putative	protein_coding_gene
PF3D7_1020300	217.328	0.213305	0.416969	0.316993	0.853426	0.884782	cytoplasmic dynein intermediate chain, putative	protein_coding_gene
PF3D7_1311200	5273.77	0.213126	0.207679	1.13953	0.565657	0.646608	transducin beta-like protein TBL1, putative	protein_coding_gene
PF3D7_0513600	36388.9	0.213043	0.244417	6.83581	0.032781	0.0738071	deoxyribodipyrimidine photo-lyase, putative	protein_coding_gene
PF3D7_0926800	4720.28	0.212882	0.190208	14.5597	0.000689288	0.00378683	conserved Plasmodium protein, unknown function	protein_coding_gene
PF3D7_0718900	6.05533	0.21288	1.2881	0.0290107	0.985599	NA	conserved Plasmodium protein, unknown function	protein_coding_gene
PF3D7_0627900	7970.01	0.212674	0.172419	5.72021	0.0572628	0.112532	ribonuclease P protein subunit p29, putative	protein_coding_gene
PF3D7_0411000	3884.13	0.212433	0.279878	4.99876	0.0821359	0.147984	conserved Plasmodium protein, unknown function	protein_coding_gene
PF3D7_0720700	13472.5	0.211756	0.224153	22.5434	1.27278e-05	0.000148168	phosphoinositide-binding protein PX1	protein_coding_gene
PF3D7_0619000	19229.2	0.211596	0.216724	16.5067	0.000260383	0.00171999	FPL domain-containing protein, putative	protein_coding_gene
PF3D7_0411300	2301.25	0.211533	0.185228	10.8873	0.0043237	0.0155893	conserved Plasmodium protein, unknown function	protein_coding_gene
PF3D7_1323500	16469.7	0.211461	0.197681	14.8447	0.000597734	0.00335947	plasmepsin V	protein_coding_gene
PF3D7_1017000	15202.7	0.211334	0.262653	0.74731	0.688214	0.752071	DNA polymerase delta catalytic subunit	protein_coding_gene
PF3D7_1343300	16638.9	0.211265	0.250725	9.98939	0.00677378	0.022203	CDT1-like protein, putative	protein_coding_gene
PF3D7_1433400	66603.7	0.211207	0.225993	27.5572	1.0376e-06	2.12095e-05	PHD finger protein PHD2, putative	protein_coding_gene
PF3D7_1230100	304.555	0.210949	0.255279	5.11488	0.077503	0.141489	thioredoxin-like associated protein 1, putative	protein_coding_gene
PF3D7_1342300	4083.2	0.210931	0.175719	2.50158	0.286279	0.384271	tetratricopeptide repeat protein, putative	protein_coding_gene
PF3D7_1468800	15247.3	0.210886	0.203511	7.11277	0.0285418	0.0666616	splicing factor U2AF large subunit, putative	protein_coding_gene
PF3D7_1033600	15840.3	0.210378	0.247303	4.48626	0.106126	0.179598	pre-mRNA-splicing factor CEF1, putative	protein_coding_gene
PF3D7_1106300	16325	0.210356	0.214273	1.03463	0.596119	0.67313	5'-3' exoribonuclease 1, putative	protein_coding_gene
PF3D7_0632800	254.992	0.208898	0.271199	14.6736	0.000651122	0.00361564	erythrocyte membrane protein 1, PfEMP1	protein_coding_gene
PF3D7_0504000	23239.7	0.208545	0.264893	14.4633	0.000723316	0.0039242	cation transporting P-ATPase	protein_coding_gene
PF3D7_1318300	6540.84	0.208445	0.186406	24.9997	3.72723e-06	5.77665e-05	conserved Plasmodium protein, unknown function	protein_coding_gene
PF3D7_1403800	858.958	0.208377	0.270931	12.0232	0.00245018	0.0102238	nuclear formin-like protein MISFIT, putative	protein_coding_gene
PF3D7_0302900	30225.5	0.208313	0.2323	1.24267	0.537227	0.621775	exportin-1, putative	protein_coding_gene
PF3D7_0517300	41699.1	0.208037	0.197278	9.34352	0.0093558	0.0287768	serine/arginine-rich splicing factor 1	protein_coding_gene
PF3D7_0626900	3200.98	0.207976	0.224169	2.02375	0.363536	0.460698	ribosomal protein L46, mitochondrial, putative	protein_coding_gene
PF3D7_1464000	6738.52	0.207755	0.201136	20.0499	4.42818e-05	0.000410556	YL1 nuclear protein, putative	protein_coding_gene
PF3D7_1246700	8279.09	0.207546	0.22377	5.12199	0.0772277	0.141036	conserved Plasmodium protein, unknown function	protein_coding_gene
PF3D7_1016300	381401	0.207436	0.255252	13.8947	0.000961156	0.00492628	GBP130 protein	protein_coding_gene
PF3D7_0622800	29838.5	0.207402	0.292843	1.41118	0.493818	0.582044	leucine--tRNA ligase, putative	protein_coding_gene
PF3D7_0932400	4023.58	0.207316	0.190654	1.88347	0.389951	0.485976	peptide chain release factor 1	protein_coding_gene
PF3D7_1211200	8502.2	0.207232	0.180552	24.6242	4.49695e-06	6.55848e-05	conserved Plasmodium protein, unknown function	protein_coding_gene
PF3D7_0502600	2427.97	0.207013	0.255615	14.1564	0.000843279	0.00440473	conserved Plasmodium protein, unknown function	protein_coding_gene
PF3D7_1127200	4.61254	0.206365	1.47312	0.636723	0.72734	NA	conserved Plasmodium protein, unknown function	protein_coding_gene
PF3D7_0622300	2162.29	0.206094	0.250323	0.671552	0.714783	0.774609	vacuolar transporter chaperone, putative	protein_coding_gene
PF3D7_1015800	26705.8	0.206068	0.169606	9.81362	0.00739605	0.0238511	ribonucleoside-diphosphate reductase small chain, putative	protein_coding_gene
PF3D7_0516400	3870.59	0.205791	0.175624	6.01528	0.0494081	0.100717	phosducin-like protein 1, putative	protein_coding_gene
PF3D7_1127900	1895.35	0.20575	0.201662	2.02513	0.363287	0.460494	conserved Plasmodium protein, unknown function	protein_coding_gene
PF3D7_0408200	613.939	0.205671	0.241421	13.0756	0.0014477	0.00679383	conserved Plasmodium protein, unknown function	protein_coding_gene
PF3D7_0112200	20113.7	0.205254	0.302911	0.608789	0.73757	0.792685	multidrug resistance-associated protein 1	protein_coding_gene
PF3D7_1026200	4175.19	0.205079	0.223275	0.856549	0.651633	0.721997	conserved protein, unknown function	protein_coding_gene
PF3D7_1206300	2793.86	0.204842	0.229594	29.8718	3.26154e-07	8.50949e-06	conserved Plasmodium protein, unknown function	protein_coding_gene
PF3D7_1114100	7958.43	0.204644	0.258146	0.937949	0.625643	0.699169	rhomboid protease ROM1	protein_coding_gene
PF3D7_0526800	13042.1	0.204555	0.2247	0.830434	0.660197	0.729984	conserved Plasmodium protein, unknown function	protein_coding_gene
PF3D7_1002500	9026.5	0.204398	0.176888	2.87501	0.23752	0.33249	conserved protein, unknown function	protein_coding_gene
PF3D7_1243100	7394.55	0.203878	0.169262	11.1325	0.00382471	0.0141338	zinc finger protein, putative	protein_coding_gene
PF3D7_1147600	1789.54	0.203751	0.194661	3.98086	0.136636	0.217679	conserved Plasmodium protein, unknown function	protein_coding_gene
PF3D7_1125800	1392.25	0.203458	0.33615	0.987292	0.610397	0.685376	kelch domain-containing protein, putative	protein_coding_gene
PF3D7_0316100	4216.71	0.203367	0.182996	11.6723	0.00292011	0.0116535	ribosomal protein L27, mitochondrial, putative	protein_coding_gene
PF3D7_1427900	54614.8	0.203299	0.206746	6.46299	0.0394984	0.0850536	leucine-rich repeat protein	protein_coding_gene
PF3D7_0102500	1507.34	0.203235	0.264042	18.6238	9.03407e-05	0.000728337	erythrocyte binding antigen-181	protein_coding_gene
PF3D7_1402900	937.301	0.203166	0.272072	20.4428	3.63828e-05	0.000348787	conserved Plasmodium protein, unknown function	protein_coding_gene
PF3D7_0708000	6591.39	0.202567	0.242635	0.726141	0.695537	0.758184	cytoskeleton associated protein, putative	protein_coding_gene
PF3D7_0628700	3232.7	0.202495	0.243987	0.711944	0.700492	0.762305	conserved Plasmodium protein, unknown function	protein_coding_gene
PF3D7_1017700	448.145	0.20246	0.279675	8.2499	0.0161643	0.043417	conserved Plasmodium protein, unknown function	protein_coding_gene
PF3D7_0514000	527.917	0.202401	0.279103	0.767456	0.681317	0.747056	tubulin--tyrosine ligase, putative	protein_coding_gene
PF3D7_0703600	4938.58	0.20205	0.282987	1.40194	0.496104	0.584075	conserved protein, unknown function	protein_coding_gene
PF3D7_1147300	28186.6	0.201226	0.176955	15.808	0.000369257	0.0022635	conserved Plasmodium protein, unknown function	protein_coding_gene
PF3D7_1427000	6860.62	0.200972	0.170833	15.7855	0.000373439	0.00228644	conserved Plasmodium protein, unknown function	protein_coding_gene
PF3D7_0612600	3340.91	0.200109	0.196271	1.43725	0.487421	0.576212	cytoplasmic tRNA 2-thiolation protein 1, putative	protein_coding_gene
PF3D7_0113100	343.353	0.20008	0.290302	17.2405	0.000180416	0.00128143	surface-associated interspersed protein 1.1 (SURFIN 1.1)	protein_coding_gene
PF3D7_0627200	1236.44	0.199974	0.242226	3.40652	0.182089	0.27206	myosin light chain, putative	protein_coding_gene
PF3D7_1147700	7738.77	0.199551	0.178818	3.11311	0.210862	0.303772	ATP synthase subunit delta, mitochondrial, putative	protein_coding_gene
PF3D7_0406000	5622.69	0.199442	0.173835	1.32771	0.514863	0.601794	conserved protein, unknown function	protein_coding_gene
PF3D7_0524300	4935.14	0.199355	0.188191	1.51004	0.47	0.560074	conserved Plasmodium protein, unknown function	protein_coding_gene
PF3D7_1130000	4973.56	0.199129	0.201518	8.178	0.016756	0.0444999	phosphoacetylglucosamine mutase, putative	protein_coding_gene
PF3D7_1416800	6283.66	0.199069	0.2442	0.662658	0.717969	0.777575	lysine--tRNA ligase, putative	protein_coding_gene
PF3D7_1462900	1032.17	0.198599	0.239098	0.739569	0.690883	0.754032	AAA ATPase, putative	protein_coding_gene
PF3D7_1352800	6180.71	0.198591	0.191744	2.34012	0.310348	0.409476	vacuolar fusion protein MON1, putative	protein_coding_gene
PF3D7_1132000	8202.32	0.198468	0.250565	1.71398	0.424438	0.51827	ubiquitin-like protein, putative	protein_coding_gene
PF3D7_1425400	2453.41	0.19839	0.26949	2.78022	0.249048	0.344357	DEAD/DEAH box helicase, putative	protein_coding_gene
PF3D7_0111800	12727.8	0.198252	0.272421	6.64875	0.0359951	0.0793894	eukaryotic translation initiation factor 4E, putative	protein_coding_gene
PF3D7_1138300	2205.76	0.198083	0.243164	0.907547	0.635227	0.706836	conserved protein, unknown function	protein_coding_gene
PF3D7_1252700	15631.3	0.197831	0.2361	1.22287	0.542572	0.626399	Plasmodium exported protein (PHISTb), unknown function	protein_coding_gene
PF3D7_1444500	3850.23	0.197574	0.178423	26.7244	1.57352e-06	2.94936e-05	eukaryotic translation initiation factor 2-alpha kinase 1	protein_coding_gene
PF3D7_0619300	5804.32	0.197382	0.252456	20.3743	3.76506e-05	0.000356719	conserved Plasmodium protein, unknown function	protein_coding_gene
PF3D7_0629700	52361	0.197201	0.240183	33.0547	6.64144e-08	2.75859e-06	SET domain protein, putative	protein_coding_gene
PF3D7_0724200	2525.33	0.197159	0.187576	1.10416	0.575751	0.655261	type 2A phosphatase-associated protein 42, putative	protein_coding_gene
PF3D7_1231400	2330.09	0.196933	0.184987	21.5143	2.12922e-05	0.00022561	membrane protein ICM1	protein_coding_gene
PF3D7_1471400	7805.49	0.196905	0.197485	13.2378	0.00133493	0.00634335	diacylglycerol kinase, putative	protein_coding_gene
PF3D7_0527000	79898.5	0.196672	0.192336	17.2165	0.000182596	0.00128628	DNA replication licensing factor MCM3, putative	protein_coding_gene
PF3D7_0917800	414.82	0.196528	0.254147	6.78373	0.0336458	0.0751998	conserved Plasmodium protein, unknown function	protein_coding_gene
PF3D7_0510500	12300.3	0.196178	0.191016	24.4636	4.87298e-06	6.9507e-05	topoisomerase I	protein_coding_gene
PF3D7_1021900	52436.7	0.196154	0.255366	18.9896	7.52424e-05	0.000628068	PHAX domain-containing protein, putative	protein_coding_gene
PF3D7_1429200	866.341	0.19601	0.309224	1.23894	0.538228	0.622394	AP2 domain transcription factor AP2-O3, putative	protein_coding_gene
PF3D7_1308600	1150.59	0.195493	0.234417	9.21696	0.00996694	0.0302622	conserved Plasmodium protein, unknown function	protein_coding_gene
PF3D7_1437100	1134.47	0.19547	0.26898	1.46061	0.481761	0.570683	conserved protein, unknown function	protein_coding_gene
PF3D7_0300800	12.8589	0.195057	0.975111	0.069951	0.965629	0.971241	rifin	protein_coding_gene
PF3D7_1454000	6237.66	0.19493	0.243919	1.10196	0.576384	0.655631	RNA-binding protein, putative	protein_coding_gene
PF3D7_1450700	12634	0.194861	0.209696	5.40619	0.0669979	0.126861	conserved Plasmodium protein, unknown function	protein_coding_gene
PF3D7_1017100	3914.42	0.19459	0.203407	1.24318	0.537088	0.621775	rhoptry neck protein 12	protein_coding_gene
PF3D7_0503900	1887.56	0.194357	0.214363	0.85897	0.650844	0.721277	conserved Plasmodium protein, unknown function	protein_coding_gene
PF3D7_0710200	37556.7	0.194149	0.188331	22.0815	1.60352e-05	0.000177515	conserved Plasmodium protein, unknown function	protein_coding_gene
PF3D7_1336600	4560.25	0.194096	0.196598	0.992449	0.608825	0.684203	conserved protein, unknown function	protein_coding_gene
PF3D7_MIT01300	19.6553	0.19392	0.836127	1.30935	0.519611	0.606524	ribosomal RNA fragment RNA10	ncRNA_gene
PF3D7_1330600	17863.6	0.193603	0.197524	14.9116	0.000578076	0.00328018	elongation factor Tu, putative	protein_coding_gene
PF3D7_1111800	1414.02	0.193037	0.197728	5.21505	0.0737169	0.136497	peptidyl-prolyl cis-trans isomerase, putative	protein_coding_gene
PF3D7_1356300	5197.56	0.192686	0.272657	0.515861	0.772649	0.820414	ubiquitin-conjugating enzyme E2, putative	protein_coding_gene
PF3D7_1225600	15409.2	0.192639	0.207141	0.993335	0.608555	0.684048	conserved Plasmodium protein, unknown function	protein_coding_gene
PF3D7_0529200	996.187	0.192599	0.294842	0.434682	0.804655	0.844848	sugar transporter, putative	protein_coding_gene
PF3D7_1437800	3699.78	0.192576	0.227938	3.67181	0.159469	0.245395	trafficking protein particle complex subunit 5, putative	protein_coding_gene
PF3D7_0508800	6994.52	0.192298	0.20663	2.75177	0.252616	0.348669	single-stranded DNA-binding protein	protein_coding_gene
PF3D7_0523600	2956.97	0.192275	0.186843	3.60211	0.165125	0.252825	conserved protein, unknown function	protein_coding_gene
PF3D7_1459600	7005.29	0.191439	0.211913	1.38562	0.500169	0.587578	AP-4 complex accessory subunit Tepsin, putative	protein_coding_gene
PF3D7_1311900	37764.8	0.191205	0.199383	18.6097	9.0983e-05	0.000728987	V-type proton ATPase catalytic subunit A	protein_coding_gene
PF3D7_1007900	19900.7	0.190838	0.249529	1.10314	0.576046	0.655453	eukaryotic translation initiation factor 3 subunit D, putative	protein_coding_gene
PF3D7_0310500	11177.9	0.190339	0.257557	12.3342	0.0020973	0.00900676	ATP-dependent RNA helicase DHX57, putative	protein_coding_gene
PF3D7_0321500	10834.9	0.190304	0.207532	1.21121	0.545745	0.62897	peptidase, putative	protein_coding_gene
PF3D7_1476100	87.7092	0.190272	0.423215	0.256873	0.87947	0.905275	early transcribed membrane protein 14.2	protein_coding_gene
PF3D7_0319200	7664.06	0.190174	0.246985	9.92639	0.00699057	0.0227841	CCR4 domain-containing protein 4, putative	protein_coding_gene
PF3D7_1321600	135.8	0.190106	0.352163	4.42283	0.109545	0.183946	cGMP-specific 3',5'-cyclic phosphodiesterase gamma, putative	protein_coding_gene
PF3D7_1232200	6293.43	0.190023	0.274815	4.27238	0.118104	0.194984	dihydrolipoyl dehydrogenase, mitochondrial	protein_coding_gene
PF3D7_1445100	10911.9	0.190018	0.248111	4.77523	0.0918485	0.160727	histidine--tRNA ligase, putative	protein_coding_gene
PF3D7_1129500	10980.3	0.190016	0.188246	6.62433	0.0364372	0.0800601	A/G-specific adenine glycosylase, putative	protein_coding_gene
PF3D7_1350700	5291.77	0.189336	0.244304	0.997387	0.607324	0.683107	N6-adenine-specific methylase, putative	protein_coding_gene
PF3D7_1120600	10450.5	0.189252	0.252543	28.4442	6.65923e-07	1.50981e-05	DDRGK domain-containing protein, putative	protein_coding_gene
PF3D7_1305400	2998.61	0.189054	0.303274	0.491229	0.782224	0.827487	AAR2 protein, putative	protein_coding_gene
PF3D7_1210000	4373.03	0.188767	0.182067	11.782	0.00276423	0.0111775	50S ribosomal protein L1, apicoplast, putative	protein_coding_gene
PF3D7_0716000	16924	0.18849	0.224803	12.1358	0.00231606	0.00976055	RNA-binding protein, putative	protein_coding_gene
PF3D7_1223400	40124.5	0.187887	0.212716	11.0671	0.00395193	0.0145315	phospholipid-transporting ATPase, putative	protein_coding_gene
PF3D7_1361100	44354.3	0.186998	0.191935	17.2253	0.000181792	0.00128378	protein transport protein Sec24A	protein_coding_gene
PF3D7_1233100	7194.05	0.186884	0.170453	1.94217	0.378672	0.475469	conserved protein, unknown function	protein_coding_gene
PF3D7_0501600	5227.14	0.186612	1.23027	0.410079	0.814615	0.852535	rhoptry-associated protein 2	protein_coding_gene
PF3D7_1018800	1754.93	0.186491	0.232761	5.90772	0.0521381	0.104923	conserved protein, unknown function	protein_coding_gene
PF3D7_1467500	9628.69	0.186041	0.177208	2.67904	0.261971	0.35869	DNA/RNA-binding protein KIN17, putative	protein_coding_gene
PF3D7_0933300	7528.73	0.185932	0.196895	3.94726	0.138952	0.220353	conserved Plasmodium protein, unknown function	protein_coding_gene
PF3D7_0716200	17728.7	0.185908	0.231971	1.65921	0.436221	0.529297	PDCD2 domain-containing protein, putative	protein_coding_gene
PF3D7_0417400	35200.2	0.185803	0.248842	27.2344	1.21936e-06	2.38494e-05	conserved Plasmodium protein, unknown function	protein_coding_gene
PF3D7_0909900	8722.61	0.185639	0.229422	1.91365	0.384111	0.480439	helicase SKI2W, putative	protein_coding_gene
PF3D7_0503600	1252.21	0.185538	0.198178	0.919643	0.631396	0.703932	myosin B	protein_coding_gene
PF3D7_0302600	5330.72	0.185521	0.211503	16.8489	0.000219439	0.00148737	ABC transporter B family member 4, putative	protein_coding_gene
PF3D7_1360800	51909.1	0.185396	0.23456	3.44427	0.178685	0.268208	falcilysin	protein_coding_gene
PF3D7_0204800	3370.11	0.185228	0.228923	0.748615	0.687766	0.751922	3'-5' exonuclease, putative	protein_coding_gene
PF3D7_1315800	5047.97	0.185145	0.25592	0.530041	0.76719	0.816692	transcription factor MYB1	protein_coding_gene
PF3D7_0621500	1663.06	0.185102	0.260227	0.578268	0.748912	0.801061	ribonuclease P/MRP protein subunit RPP1, putative	protein_coding_gene
PF3D7_0318000	92.1124	0.185039	0.415238	4.45312	0.107899	0.182005	conserved Plasmodium protein, unknown function	protein_coding_gene
PF3D7_0929000	5269.45	0.184734	0.213084	3.82664	0.147589	0.2306	transcription initiation factor TFIID subunit 7, putative	protein_coding_gene
PF3D7_0812500	18502.5	0.184734	0.182216	18.2577	0.000108493	0.000840738	RNA-binding protein, putative	protein_coding_gene
PF3D7_1446400	3395.96	0.184698	0.186623	1.67963	0.431789	0.524532	pyruvate dehydrogenase E1 component subunit beta	protein_coding_gene
PF3D7_0306600	3721.79	0.184544	0.175632	5.41162	0.0668162	0.126699	ATP synthase-associated protein, putative	protein_coding_gene
PF3D7_0612100	17426	0.184297	0.256092	1.17846	0.554754	0.63723	eukaryotic translation initiation factor 3 subunit L, putative	protein_coding_gene
PF3D7_1467300	10520.3	0.184269	0.182247	8.36978	0.0152239	0.0413402	1-deoxy-D-xylulose 5-phosphate reductoisomerase	protein_coding_gene
PF3D7_0932800	9958.99	0.18407	0.241905	8.80028	0.0122756	0.0353409	importin alpha re-exporter, putative	protein_coding_gene
PF3D7_1301600	1000.06	0.183845	0.339136	11.509	0.00316852	0.0123599	erythrocyte binding antigen-140	protein_coding_gene
PF3D7_1204700	4027.81	0.183723	0.216329	3.3535	0.186981	0.27777	conserved protein, unknown function	protein_coding_gene
PF3D7_0404000	127.005	0.183712	0.52235	3.68302	0.158578	0.244385	conserved Plasmodium protein, unknown function	protein_coding_gene
PF3D7_1320300	3505.01	0.18361	0.218304	5.05264	0.0799528	0.144993	conserved protein, unknown function	protein_coding_gene
PF3D7_1011100	1810.22	0.183586	0.219796	2.31329	0.31454	0.41365	conserved Plasmodium protein, unknown function	protein_coding_gene
PF3D7_0918400	84.86	0.183462	0.387051	3.34677	0.187611	0.278387	conserved Plasmodium protein, unknown function	protein_coding_gene
PF3D7_1312900	26854	0.183075	0.173877	22.8638	1.08441e-05	0.000132165	eukaryotic translation initation factor 4 gamma	protein_coding_gene
PF3D7_1423700	43074.5	0.182927	0.24499	14.9478	0.000567707	0.00323195	conserved Plasmodium protein, unknown function	protein_coding_gene
PF3D7_0218300	5307.85	0.182918	0.18949	5.20064	0.0742499	0.137131	rRNA methyltransferase, putative	protein_coding_gene
PF3D7_1130700	9236.32	0.182823	0.22974	21.6277	2.01186e-05	0.000216264	structural maintenance of chromosomes protein 1, putative	protein_coding_gene
PF3D7_0617200	49799.3	0.182798	0.215882	10.3362	0.00569536	0.0193523	BFR1 domain-containing protein, putative	protein_coding_gene
PF3D7_0810200	4186.3	0.182717	0.299497	1.03418	0.596254	0.673136	ABC1 family, putative	protein_coding_gene
PF3D7_0730200	3132.51	0.182284	0.252311	1.11097	0.573795	0.653178	AP-4 complex subunit beta, putative	protein_coding_gene
PF3D7_0802400	8201.84	0.182194	0.246205	1.88383	0.389881	0.485976	cyclin-like protein, putative	protein_coding_gene
PF3D7_1247000	2403.08	0.181625	0.212323	2.96743	0.226794	0.321159	F-box only protein 9 homolog, putative	protein_coding_gene
PF3D7_1422300	2565.43	0.181593	0.173177	1.77636	0.411405	0.506284	DnaJ protein, putative	protein_coding_gene
PF3D7_0908300	13872.2	0.181506	0.239455	0.828635	0.660791	0.730119	conserved protein, unknown function	protein_coding_gene
PF3D7_0409600	12729.2	0.181292	0.290999	1.88262	0.390116	0.485976	replication protein A1, large subunit	protein_coding_gene
PF3D7_1026100	723.06	0.181287	0.272022	1.37319	0.503287	0.590567	conserved Plasmodium protein, unknown function	protein_coding_gene
PF3D7_1461500	4.86085	0.181226	1.69632	0.0232048	0.988465	NA	meiotic nuclear division protein 1, putative	protein_coding_gene
PF3D7_0317800	11131.1	0.180952	0.199139	0.824979	0.662	0.731299	26S proteasome non-ATPase regulatory subunit 9, putative	protein_coding_gene
PF3D7_0320200	1276.12	0.180754	0.23621	0.614523	0.735458	0.790907	CPW-WPC family protein	protein_coding_gene
PF3D7_1224700	5814.56	0.180671	0.218298	19.7413	5.16685e-05	0.000463321	conserved Plasmodium protein, unknown function	protein_coding_gene
PF3D7_1359300	11867.8	0.180617	0.282925	1.7974	0.407099	0.502189	exosome complex exonuclease RRP44	protein_coding_gene
PF3D7_0308700	707.279	0.180142	0.380743	0.785712	0.675126	0.741853	conserved protein, unknown function	protein_coding_gene
PF3D7_0719100	6634.38	0.179979	0.212959	2.76069	0.251492	0.347366	ATP synthase F0 subunit a-like protein, putative	protein_coding_gene
PF3D7_1453700	129091	0.179568	0.263643	0.476921	0.78784	0.831564	HSP90 co-chaperone p23	protein_coding_gene
PF3D7_1004700	1131.3	0.179563	0.191636	1.47866	0.477433	0.566591	conserved protein, unknown function	protein_coding_gene
PF3D7_1017200	750.916	0.179523	0.214811	0.806348	0.668196	0.736732	enoyl-CoA hydratase-related protein, putative	protein_coding_gene
PF3D7_1439700	12188.5	0.17949	0.167815	3.86427	0.144839	0.227329	leucine carboxyl methyltransferase, putative	protein_coding_gene
PF3D7_1368700	6131.99	0.179086	0.196338	28.6052	6.1441e-07	1.43694e-05	mitochondrial carrier protein, putative	protein_coding_gene
PF3D7_1472800	12818.2	0.178993	0.22653	1.57954	0.453949	0.545959	HSP20-like chaperone, putative	protein_coding_gene
PF3D7_0931400	15384.1	0.178564	0.191431	2.98503	0.224807	0.318906	PUB domain-containing protein, putative	protein_coding_gene
PF3D7_1231000	3644.86	0.178406	0.178929	14.5516	0.000692091	0.00379444	conserved Plasmodium protein, unknown function	protein_coding_gene
PF3D7_0623200	4705.48	0.177333	0.253718	0.49067	0.782442	0.827549	ferredoxin--NADP reductase	protein_coding_gene
PF3D7_1367100	11352.4	0.177185	0.175915	8.99229	0.0111519	0.0330672	U1 small nuclear ribonucleoprotein 70 kDa homolog, putative	protein_coding_gene
PF3D7_1129800	3181.16	0.177158	0.173707	1.43345	0.48835	0.577171	conserved Plasmodium protein, unknown function	protein_coding_gene
PF3D7_0931900	142.168	0.176956	0.423868	4.75839	0.0926251	0.161542	adenylate kinase-like protein 2	protein_coding_gene
PF3D7_1227000	606.708	0.176902	0.273323	0.61514	0.735232	0.79086	conserved Plasmodium protein, unknown function	protein_coding_gene
PF3D7_0820700	26876.4	0.176736	0.208376	12.3688	0.00206134	0.0089039	2-oxoglutarate dehydrogenase E1 component	protein_coding_gene
PF3D7_0718600	1642.55	0.176312	0.187818	17.8723	0.000131546	0.0009813	conserved Plasmodium protein, unknown function	protein_coding_gene
PF3D7_1455800	81.8546	0.176162	0.387848	0.242524	0.885802	0.910349	LCCL domain-containing protein	protein_coding_gene
PF3D7_0107800	6483.41	0.176009	0.200464	24.7342	4.25635e-06	6.31399e-05	double-strand break repair protein MRE11	protein_coding_gene
PF3D7_0509300	2103.82	0.175766	0.209624	0.760769	0.683599	0.748628	conserved Plasmodium protein, unknown function	protein_coding_gene
PF3D7_1428000	4084.93	0.17561	0.264715	2.09657	0.350539	0.448496	conserved Plasmodium membrane protein, unknown function	protein_coding_gene
PF3D7_1013800	2320.6	0.175351	0.221789	8.87755	0.0118104	0.0344492	conserved Plasmodium protein, unknown function	protein_coding_gene
PF3D7_0104000	202.324	0.175009	0.336272	1.52676	0.466089	0.556818	thrombospondin-related sporozoite protein	protein_coding_gene
PF3D7_1467600	4369.13	0.174727	0.28203	24.913	3.89234e-06	6.01459e-05	conserved Plasmodium protein, unknown function	protein_coding_gene
PF3D7_1419700	16746.6	0.174509	0.298313	5.89862	0.0523759	0.105252	eukaryotic translation initiation factor 3 subunit H, putative	protein_coding_gene
PF3D7_0808100	2035.17	0.174501	0.223419	14.3585	0.000762231	0.00408833	AP-3 complex subunit delta, putative	protein_coding_gene
PF3D7_1418100	255.715	0.174329	0.328104	16.2276	0.000299375	0.00191896	liver specific protein 1, putative	protein_coding_gene
PF3D7_1238000	437.744	0.174063	0.46656	2.15773	0.339981	0.438228	COPI associated protein, putative	protein_coding_gene
PF3D7_1346800	54.4017	0.173916	0.496246	0.134918	0.934766	0.946888	6-cysteine protein P47	protein_coding_gene
PF3D7_1438100	20180.3	0.173867	0.193611	7.79223	0.0203207	0.0514471	translocation protein SEC62, putative	protein_coding_gene
PF3D7_0917900	442207	0.173653	0.206637	16.5078	0.000260241	0.00171999	heat shock protein 70	protein_coding_gene
PF3D7_0313700	6674.5	0.173478	0.209447	3.72414	0.155351	0.240268	conserved Plasmodium protein, unknown function	protein_coding_gene
PF3D7_1439300	10205.8	0.172966	0.163933	24.7569	4.20831e-06	6.27861e-05	Sad1/UNC domain-containing protein, putative	protein_coding_gene
PF3D7_0920700	2599.11	0.17234	0.235299	5.53122	0.0629378	0.120893	CRAL/TRIO domain-containing protein, putative	protein_coding_gene
PF3D7_0919400	16546.4	0.172101	0.289555	6.69714	0.0351345	0.0779566	protein disulfide-isomerase PDI-Trans	protein_coding_gene
PF3D7_1448200	59.7603	0.172075	0.456028	5.39644	0.0673252	0.127388	condensin-2 complex subunit G2, putative	protein_coding_gene
PF3D7_0607900	4079.44	0.171732	0.244619	1.36232	0.506029	0.593071	conserved Plasmodium protein, unknown function	protein_coding_gene
PF3D7_0707700	24505	0.171579	0.280683	0.739224	0.691002	0.754032	E3 ubiquitin-protein ligase, putative	protein_coding_gene
PF3D7_1011900	8112.43	0.171411	0.250786	7.82798	0.0199607	0.0508913	heme oxygenase	protein_coding_gene
PF3D7_1359700	841.003	0.170839	0.290599	7.52805	0.0231902	0.0567941	conserved Plasmodium protein, unknown function	protein_coding_gene
PF3D7_1033000	3465.46	0.170718	0.205691	4.01198	0.134527	0.215243	heptatricopeptide repeat-containing protein HPR1, putative	protein_coding_gene
PF3D7_1025100	10138.5	0.170641	0.168774	1.02196	0.599907	0.676377	glutamine--fructose-6-phosphate aminotransferase [isomerizing], putative	protein_coding_gene
PF3D7_0806100	4026.28	0.170491	0.174723	2.72978	0.255409	0.351933	conserved Plasmodium protein, unknown function	protein_coding_gene
PF3D7_1321700	27585.2	0.170187	0.208504	2.81904	0.24426	0.339091	splicing factor 1	protein_coding_gene
PF3D7_0204600	3590.8	0.169615	0.27689	12.7199	0.00172947	0.00778111	5'-3' exonuclease, putative	protein_coding_gene
PF3D7_0711200	609.442	0.16959	0.2374	5.86202	0.0533433	0.10681	conserved Plasmodium protein, unknown function	protein_coding_gene
PF3D7_1108700	41759.7	0.16957	0.17242	18.3417	0.000104026	0.000813409	heat shock protein J2	protein_coding_gene
PF3D7_1125700	1991.18	0.168826	0.18174	1.05767	0.589291	0.667597	kelch domain-containing protein, putative	protein_coding_gene
PF3D7_0103300	4715.62	0.168626	0.27121	6.71439	0.0348327	0.0773531	conserved protein, unknown function	protein_coding_gene
PF3D7_0725000	7576.04	0.168398	0.2157	25.861	2.42306e-06	4.04519e-05	exonuclease I, putative	protein_coding_gene
PF3D7_0603200	16469.9	0.16818	0.1621	9.08074	0.0106695	0.0319468	mitochondrial chaperone BCS1, putative	protein_coding_gene
PF3D7_0728100	9158.97	0.168162	0.234435	26.6944	1.59732e-06	2.9832e-05	anaphase-promoting complex subunit 1, putative	protein_coding_gene
PF3D7_1456500	13142	0.16799	0.225203	16.2593	0.000294665	0.00189344	STAG domain-containing protein, putative	protein_coding_gene
PF3D7_0409100	18499.3	0.167964	0.226155	2.02608	0.363114	0.460388	U4/U6 small nuclear ribonucleoprotein PRP31, putative	protein_coding_gene
PF3D7_1012300	9803.36	0.167935	0.201657	9.42793	0.00896914	0.0278183	cytochrome b-c1 complex subunit 7, putative	protein_coding_gene
PF3D7_0726600	3422.42	0.167633	0.199155	1.81977	0.402571	0.498367	conserved Plasmodium protein, unknown function	protein_coding_gene
PF3D7_1452800	333.1	0.167031	0.290378	0.329955	0.847913	0.880297	conserved Plasmodium protein, unknown function	protein_coding_gene
PF3D7_0405000	4455.34	0.16703	0.239097	0.517405	0.772053	0.820237	ATP-dependent RNA helicase DDX51, putative	protein_coding_gene
PF3D7_1355700	12388.5	0.166902	0.252925	6.30604	0.042723	0.0900966	NLI interacting factor-like phosphatase, putative	protein_coding_gene
PF3D7_1251600	7421.59	0.166653	0.205375	12.9077	0.00157443	0.0072404	conserved Plasmodium protein, unknown function	protein_coding_gene
PF3D7_0912000	9119.91	0.166502	0.229876	15.2666	0.00048406	0.00284625	conserved Plasmodium protein, unknown function	protein_coding_gene
PF3D7_1354000	134.091	0.166103	0.321107	1.24278	0.537198	0.621775	conserved Plasmodium protein, unknown function	protein_coding_gene
PF3D7_1335800	4742.36	0.166078	0.210217	2.70255	0.25891	0.35584	conserved Plasmodium protein, unknown function	protein_coding_gene
PF3D7_1120500	8214.77	0.165653	0.211871	0.64113	0.725739	0.784239	tRNA nucleotidyltransferase, putative	protein_coding_gene
PF3D7_1004900	9014.41	0.16472	0.177995	2.53584	0.281416	0.379214	conserved protein, unknown function	protein_coding_gene
PF3D7_0801100	3996.05	0.164544	0.364592	7.84866	0.0197553	0.0505518	28S ribosomal RNA	ncRNA_gene
PF3D7_0801700	14002.5	0.164531	0.23701	19.3416	6.30998e-05	0.000539726	sentrin-specific protease 2, putative	protein_coding_gene
PF3D7_1110100	1679.01	0.164405	0.241037	11.7119	0.00286284	0.0114779	conserved Plasmodium protein, unknown function	protein_coding_gene
PF3D7_0808700	715.008	0.16438	0.224653	4.86131	0.0879791	0.155476	erythrocyte membrane protein 1, PfEMP1	protein_coding_gene
PF3D7_0514900	2505.86	0.16405	0.249187	2.87502	0.237518	0.33249	conserved Plasmodium protein, unknown function	protein_coding_gene
PF3D7_1419000	6947.88	0.164027	0.252023	19.6821	5.32209e-05	0.000471707	conserved Plasmodium protein, unknown function	protein_coding_gene
PF3D7_1032700	5070.3	0.163944	0.211183	13.111	0.00142227	0.00670701	conserved Plasmodium protein, unknown function	protein_coding_gene
PF3D7_0728900	7114.61	0.163794	0.261305	3.44043	0.179028	0.268568	RNA-binding protein, putative	protein_coding_gene
PF3D7_1411300	4669.12	0.163778	0.180531	1.05977	0.588673	0.667043	DnaJ protein, putative	protein_coding_gene
PF3D7_1305800	23.1589	0.163479	0.779378	0.240761	0.886583	0.910972	conserved Plasmodium protein, unknown function	protein_coding_gene
PF3D7_1352000	5403.81	0.16327	0.197491	33.2965	5.88527e-08	2.53611e-06	GTP-binding protein, putative	protein_coding_gene
PF3D7_1103600	5797.3	0.162781	0.194845	4.71323	0.0947403	0.164238	actin-like protein, putative	protein_coding_gene
PF3D7_1147200	45.7562	0.162596	0.688103	8.24808	0.016179	0.0434278	tubulin--tyrosine ligase, putative	protein_coding_gene
PF3D7_1345600	2261.67	0.162282	0.343688	1.22458	0.542107	0.626027	inner membrane complex protein	protein_coding_gene
PF3D7_1033100	115223	0.161974	0.277028	9.28726	0.00962272	0.0295067	S-adenosylmethionine decarboxylase/ornithine decarboxylase	protein_coding_gene
PF3D7_0715900	28964.5	0.161493	0.199881	13.1025	0.00142833	0.00672949	cation diffusion facilitator family protein, putative	protein_coding_gene
PF3D7_0804600	7615.59	0.161085	0.211426	1.12532	0.569692	0.649623	tRNA pseudouridine synthase, putative	protein_coding_gene
PF3D7_0206500	7573.59	0.160565	0.258448	10.1497	0.00625203	0.0208615	conserved Plasmodium protein, unknown function	protein_coding_gene
PF3D7_1210400	4137.77	0.160187	0.197909	3.08141	0.21423	0.307345	general transcription factor 3C polypeptide 5, putative	protein_coding_gene
PF3D7_1305100	3634.07	0.159873	0.197296	0.764084	0.682466	0.747703	protein AMR3	protein_coding_gene
PF3D7_1125300	13806.3	0.159848	0.31273	3.54739	0.169705	0.258617	DNA-directed RNA polymerase	protein_coding_gene
PF3D7_1448500	26846.6	0.159814	0.220541	27.2244	1.22547e-06	2.38494e-05	conserved Plasmodium protein, unknown function	protein_coding_gene
PF3D7_1346900	2237.37	0.159761	0.224379	3.80124	0.149476	0.23291	conserved Plasmodium protein, unknown function	protein_coding_gene
PF3D7_1373100	0.332375	0.159562	4.05639	0.212937	0.899003	NA	rifin	protein_coding_gene
PF3D7_0525300	211.681	0.159231	0.344081	10.7946	0.00452884	0.0160861	conserved protein, unknown function	protein_coding_gene
PF3D7_0105700	10332.7	0.158766	0.26199	24.4412	4.92788e-06	7.00974e-05	asparagine-rich antigen Pfa35-2	protein_coding_gene
PF3D7_1231300	76.8404	0.158731	0.496231	4.02243	0.133826	0.214452	conserved Plasmodium protein, unknown function	protein_coding_gene
PF3D7_0709600	6418.55	0.158647	0.2432	7.11607	0.0284947	0.0666417	ribonucleases P/MRP protein subunit POP1, putative	protein_coding_gene
PF3D7_1100700	0.332383	0.158603	4.05641	0.213093	0.898933	NA	stevor, pseudogene	pseudogene
PF3D7_0505600	2544.99	0.158452	0.190567	0.94735	0.622709	0.696415	BCNT domain-containing protein, putative	protein_coding_gene
PF3D7_1345800	6993.32	0.158384	0.239672	4.28051	0.117625	0.194708	conserved Plasmodium protein, unknown function	protein_coding_gene
PF3D7_1229600	9307.11	0.15725	0.218382	33.5782	5.11188e-08	2.28801e-06	conserved Plasmodium protein, unknown function	protein_coding_gene
PF3D7_0829000	6560.95	0.156809	0.235335	12.3548	0.00207578	0.0089588	conserved Plasmodium membrane protein, unknown function	protein_coding_gene
PF3D7_1013900	6576.01	0.156473	0.214041	0.575793	0.749839	0.801888	translation initiation factor eIF-2B subunit delta, putative	protein_coding_gene
PF3D7_1356400	4099.49	0.156172	0.212685	0.578907	0.748673	0.801041	phosphatase 2A regulatory subunit-related protein, putative	protein_coding_gene
PF3D7_0210000	16021.4	0.156119	0.220822	9.0608	0.0107764	0.0321556	secretory complex protein 61 gamma subunit	protein_coding_gene
PF3D7_1409300	8526.51	0.155889	0.234741	3.7037	0.156947	0.242448	DNA damage-inducible protein 1	protein_coding_gene
PF3D7_0921900	15620.4	0.155446	0.181259	1.05378	0.590438	0.668354	conserved Plasmodium protein, unknown function	protein_coding_gene
PF3D7_0400100	2875.98	0.155133	0.207516	4.65048	0.0977598	0.168234	erythrocyte membrane protein 1, PfEMP1	protein_coding_gene
PF3D7_1201400	809.354	0.155121	0.231758	20.0426	4.44426e-05	0.000411312	Plasmodium exported protein, unknown function	protein_coding_gene
PF3D7_0414600	4484.48	0.155003	0.296968	7.43933	0.024242	0.0587878	acylated pleckstrin-homology domain-containing protein, putative	protein_coding_gene
PF3D7_1006400	2740.46	0.154861	0.193909	10.1027	0.00640057	0.0213024	heptatricopeptide repeat-containing protein, putative	protein_coding_gene
PF3D7_1459000	24794.8	0.15473	0.211187	0.541945	0.762638	0.813229	ATP-dependent RNA helicase DBP5	protein_coding_gene
PF3D7_1214700	1542.36	0.154623	0.224863	0.50189	0.778065	0.823759	conserved protein, unknown function	protein_coding_gene
PF3D7_1462100	1572.63	0.154514	0.208223	6.2331	0.0443097	0.0927271	conserved Plasmodium protein, unknown function	protein_coding_gene
PF3D7_1228800	26340.6	0.154365	0.245101	23.1785	9.26538e-06	0.000115918	WD repeat-containing protein, putative	protein_coding_gene
PF3D7_0714000	66531.9	0.154208	0.248199	5.33514	0.0694207	0.130402	histone H2B variant	protein_coding_gene
PF3D7_0813800	748.828	0.154148	0.287869	1.72773	0.42153	0.515567	GDP-mannose 4,6-dehydratase	protein_coding_gene
PF3D7_1229000	7999.62	0.154115	0.260849	8.51335	0.0141693	0.0392953	conserved Plasmodium membrane protein, unknown function	protein_coding_gene
PF3D7_1433300	3147.6	0.153486	0.281905	1.30516	0.5207	0.607386	histone-binding protein RBBP7, putative	protein_coding_gene
PF3D7_1358000	2008.58	0.153479	0.262576	22.3887	1.37519e-05	0.000156633	patatin-like phospholipase, putative	protein_coding_gene
PF3D7_0318600	4378.26	0.153453	0.300593	5.01386	0.0815181	0.147215	cleavage and polyadenylation specificity factor, putative	protein_coding_gene
PF3D7_1442900	17804.2	0.15334	0.198454	28.9722	5.1142e-07	1.24079e-05	Sec7 domain-containing protein ARFGEF, putative	protein_coding_gene
PF3D7_1342400	36050.7	0.153146	0.162976	15.9989	0.000335655	0.00208702	casein kinase II beta chain	protein_coding_gene
PF3D7_0415200	6167.49	0.15295	0.258496	26.1142	2.13492e-06	3.67037e-05	conserved Plasmodium protein, unknown function	protein_coding_gene
PF3D7_1467400	4180.85	0.152243	0.193505	5.99841	0.0498266	0.101451	50S ribosomal protein L22, apicoplast, putative	protein_coding_gene
PF3D7_1210900	1919.04	0.151866	0.240086	0.398955	0.819159	0.856093	GPI mannosyltransferase 1	protein_coding_gene
PF3D7_0935390	7475.4	0.151712	0.256082	2.34544	0.309524	0.408711	gdv1 antisense RNA	ncRNA_gene
PF3D7_1006500	2226.71	0.151628	0.203289	3.8007	0.149516	0.23291	conserved Plasmodium protein, unknown function	protein_coding_gene
PF3D7_1126700	1471.5	0.151271	0.371431	19.6785	5.33182e-05	0.000471707	conserved Plasmodium protein, unknown function	protein_coding_gene
PF3D7_0822000	5445.56	0.151222	0.1921	3.9371	0.139659	0.221353	ribosomal protein L4, mitochondrial, putative	protein_coding_gene
PF3D7_1245100	3516.25	0.151144	0.226527	0.888283	0.641375	0.712761	kinesin-13, putative	protein_coding_gene
PF3D7_0103700	1293.34	0.150596	0.225938	10.2739	0.00587569	0.0198223	L-seryl-tRNA(Sec) kinase, putative	protein_coding_gene
PF3D7_1302500	10943.1	0.150375	0.249124	2.24365	0.325686	0.424331	AAA domain-containing protein, putative	protein_coding_gene
PF3D7_0728800	8174.4	0.150226	0.225825	2.13985	0.343034	0.440958	conserved Plasmodium protein, unknown function	protein_coding_gene
PF3D7_1321800	5934.18	0.149979	0.208462	1.06332	0.58763	0.666152	protein transport protein SFT2, putative	protein_coding_gene
PF3D7_1365700	7264.08	0.149762	0.216054	1.88289	0.390065	0.485976	SNARE associated Golgi protein, putative	protein_coding_gene
PF3D7_1033900	7933.74	0.149367	0.345484	7.47446	0.02382	0.0580627	ubiquitin-conjugating enzyme E2, putative	protein_coding_gene
PF3D7_1406100	3598.17	0.149111	0.187555	19.6716	5.35003e-05	0.000471707	tubby domain-containing protein, putative	protein_coding_gene
PF3D7_1445600	11767.4	0.148628	0.273144	1.34624	0.510115	0.59732	RNA-binding protein, putative	protein_coding_gene
PF3D7_0621900	12026.1	0.148133	0.202945	3.69575	0.157571	0.243176	signal recognition particle subunit SRP68, putative	protein_coding_gene
PF3D7_1452600	6729.88	0.148071	0.198699	26.3055	1.94018e-06	3.43802e-05	conserved Plasmodium protein, unknown function	protein_coding_gene
PF3D7_0810900	2313.07	0.147621	0.174852	0.759584	0.684004	0.748913	conserved Plasmodium protein, unknown function	protein_coding_gene
PF3D7_0532700	17.9261	0.147577	0.748438	0.183045	0.912541	0.930279	erythrocyte membrane protein 1 (PfEMP1), pseudogene	pseudogene
PF3D7_1435500	10032.8	0.147482	0.200488	4.97833	0.0829791	0.148818	clathrin light chain, putative	protein_coding_gene
PF3D7_1140300	1310.91	0.147455	0.220914	0.461596	0.7939	0.836091	P-loop containing nucleoside triphosphate hydrolase, putative	protein_coding_gene
PF3D7_1037000	6447.05	0.147176	0.234236	26.93	1.41982e-06	2.69041e-05	DNA polymerase zeta catalytic subunit, putative	protein_coding_gene
PF3D7_0925800	5843.79	0.14711	0.218555	23.4834	7.95509e-06	0.000101812	regulator of nonsense transcripts 2, putative	protein_coding_gene
PF3D7_0823000	1873.16	0.147064	0.22075	9.39875	0.00910094	0.028142	serine/threonine protein kinase VPS15, putative	protein_coding_gene
PF3D7_0500800	427141	0.147001	0.260127	39.1479	3.15608e-09	2.73106e-07	mature parasite-infected erythrocyte surface antigen	protein_coding_gene
PF3D7_0504200	1861.42	0.146923	0.239737	9.67643	0.00792116	0.0252776	ATP-dependent RNA helicase DDX27, putative	protein_coding_gene
PF3D7_0205000	860.61	0.14634	0.307495	15.2388	0.000490824	0.0028795	conserved Plasmodium protein, unknown function	protein_coding_gene
PF3D7_1407300	13983.8	0.146009	0.266578	0.600559	0.740611	0.794802	pre-mRNA-splicing factor 38B, putative	protein_coding_gene
PF3D7_0203900	4811.76	0.145765	0.181141	0.646477	0.723801	0.782912	5'-3' exonuclease, putative	protein_coding_gene
PF3D7_0111300	9912.14	0.145377	0.193308	25.7849	2.51693e-06	4.17505e-05	P-loop containing nucleoside triphosphate hydrolase, putative	protein_coding_gene
PF3D7_0509600	14886.3	0.145057	0.257169	2.6979	0.259513	0.356358	asparagine--tRNA ligase	protein_coding_gene
PF3D7_0407100	2641.69	0.144899	0.182834	0.745752	0.68875	0.752365	methyltransferase, putative	protein_coding_gene
PF3D7_1221300	15253.1	0.144708	0.172927	3.90588	0.141856	0.223921	conserved Plasmodium protein, unknown function	protein_coding_gene
PF3D7_1000200	11.5745	0.144538	0.958207	1.31229	0.518849	NA	rifin	protein_coding_gene
PF3D7_1122000	1539.31	0.144471	0.295783	0.275118	0.871483	0.899372	conserved protein, unknown function	protein_coding_gene
PF3D7_1308400	24464.5	0.144333	0.246829	26.9955	1.37406e-06	2.63776e-05	conserved Plasmodium protein, unknown function	protein_coding_gene
PF3D7_0202900	963.536	0.143865	0.313345	2.28188	0.319519	0.418713	palmitoyltransferase DHHC12, putative	protein_coding_gene
PF3D7_1238300	16866.3	0.143823	0.245022	8.51556	0.0141537	0.0392953	pre-mRNA-splicing factor CWC22, putative	protein_coding_gene
PF3D7_MIT04000	604395	0.143319	0.35791	7.40802	0.0246246	0.0593552	large subunit ribosomal RNA fragment E	ncRNA_gene
PF3D7_1446900	11682	0.143295	0.193833	0.86929	0.647495	0.718485	glutaminyl-peptide cyclotransferase, putative	protein_coding_gene
PF3D7_1208200	469.421	0.143095	0.290078	2.87049	0.238057	0.332882	cysteine repeat modular protein 3	protein_coding_gene
PF3D7_1349900	1210.16	0.143089	0.272754	0.623755	0.732071	0.788899	conserved Plasmodium protein, unknown function	protein_coding_gene
PF3D7_1335300	1232.32	0.142737	0.247644	31.208	1.67211e-07	5.35901e-06	reticulocyte binding protein 2 homologue b	protein_coding_gene
PF3D7_0824400	20407.4	0.141914	0.277014	1.07046	0.585535	0.664237	nucleoside transporter 2	protein_coding_gene
PF3D7_0629900	12513	0.141834	0.196119	20.549	3.45017e-05	0.000334827	CRAL/TRIO domain-containing protein, putative	protein_coding_gene
PF3D7_1115500	14315.1	0.141724	0.232471	4.74022	0.0934705	0.162437	AP2 domain transcription factor, putative	protein_coding_gene
PF3D7_0606800	10842.3	0.141272	0.302852	8.40635	0.014948	0.0407617	VFT protein	protein_coding_gene
PF3D7_1005600	10043.7	0.141063	0.278647	0.367458	0.832161	0.867238	DnaJ protein, putative	protein_coding_gene
PF3D7_1441600	2242.51	0.140927	0.226978	11.1546	0.00378267	0.0140283	acid cluster protein 33 homologue, putative	protein_coding_gene
PF3D7_1228900	16661.8	0.140806	0.26415	2.05159	0.358511	0.455775	conserved protein, unknown function	protein_coding_gene
PF3D7_0212500	26151.4	0.140245	0.220688	24.6374	4.46748e-06	6.53385e-05	conserved Plasmodium protein, unknown function	protein_coding_gene
PF3D7_1015100	2875.23	0.140231	0.200752	1.04297	0.593639	0.671246	CWC16 domain-containing protein, putative	protein_coding_gene
PF3D7_0627700	42850.6	0.140226	0.258965	0.526457	0.768566	0.817704	transportin	protein_coding_gene
PF3D7_0307400	9742.34	0.140129	0.209877	6.67098	0.0355971	0.0787473	ATP-dependent Clp protease proteolytic subunit	protein_coding_gene
PF3D7_1308500	3346.74	0.140066	0.203216	6.05714	0.0483847	0.099137	conserved Plasmodium protein, unknown function	protein_coding_gene
PF3D7_1200500	3383.33	0.14005	0.274718	5.63713	0.0596915	0.116205	rifin	protein_coding_gene
PF3D7_1239800	26260.8	0.139127	0.245827	16.1286	0.000314578	0.00199182	conserved Plasmodium protein, unknown function	protein_coding_gene
PF3D7_1435100	2400.61	0.13907	0.191898	3.31166	0.190933	0.28259	ribonuclease H2 subunit B, putative	protein_coding_gene
PF3D7_1432400	1815.1	0.139016	0.230561	10.2699	0.00588749	0.0198492	leucine-rich repeat protein	protein_coding_gene
PF3D7_0603000	3833.14	0.138953	0.191942	14.3616	0.000761053	0.00408623	SDE2 domain-containing protein, putative	protein_coding_gene
PF3D7_1009900	1800.87	0.138612	0.24666	5.01744	0.0813723	0.147153	heptatricopeptide repeat-containing protein, putative	protein_coding_gene
PF3D7_1240400	1155.06	0.138187	0.233089	2.94195	0.229701	0.324126	erythrocyte membrane protein 1, PfEMP1	protein_coding_gene
PF3D7_0313100	40265.7	0.137553	0.176576	4.32253	0.11518	0.191425	ubiquitin-protein ligase, putative	protein_coding_gene
PF3D7_1010000	4823.7	0.137508	0.170191	0.932209	0.627442	0.700275	ribosomal protein L43, mitochondrial, putative	protein_coding_gene
PF3D7_0508700	13968.5	0.13734	0.231416	18.5219	9.50665e-05	0.000753565	pre-mRNA-processing ATP-dependent RNA helicase PRP5, putative	protein_coding_gene
PF3D7_1405700	3820.26	0.137291	0.207451	4.18251	0.123532	0.201438	RING zinc finger protein, putative	protein_coding_gene
PF3D7_0321800	12222	0.137251	0.249422	18.2237	0.000110348	0.000851303	WD repeat-containing protein, putative	protein_coding_gene
PF3D7_1106200	1295.53	0.1372	0.228707	16.9474	0.000208886	0.00143373	conserved Plasmodium protein, unknown function	protein_coding_gene
PF3D7_0112700	6184.19	0.137048	0.270493	60.1617	8.631e-14	4.97913e-11	28S ribosomal RNA	ncRNA_gene
PF3D7_1136800	5771.32	0.136658	0.213428	2.70941	0.258023	0.35497	DnaJ protein, putative	protein_coding_gene
PF3D7_1436100	5882.9	0.136183	0.195252	27.9484	8.53277e-07	1.85528e-05	conserved Plasmodium membrane protein, unknown function	protein_coding_gene
PF3D7_1453000	3098.43	0.135867	0.176136	7.34512	0.0254114	0.0608092	conserved Plasmodium protein, unknown function	protein_coding_gene
PF3D7_1432800	6476.56	0.135001	0.222166	2.30337	0.316103	0.415496	HP12 protein homolog, putative	protein_coding_gene
PF3D7_1136500	53917.1	0.134944	0.225121	1.68441	0.43076	0.523404	casein kinase 1	protein_coding_gene
PF3D7_0916300	493.05	0.134684	0.393904	5.91493	0.0519504	0.104774	conserved Plasmodium protein, unknown function	protein_coding_gene
PF3D7_1025000	7347.07	0.134471	0.217721	11.9281	0.00256955	0.010563	Eps15-like protein	protein_coding_gene
PF3D7_1128500	4856.29	0.134368	0.251312	3.02766	0.220066	0.31338	Fe-S cluster assembly factor HCF101, putative	protein_coding_gene
PF3D7_0510100	26980.6	0.134022	0.249465	19.3417	6.30975e-05	0.000539726	KH domain-containing protein, putative	protein_coding_gene
PF3D7_1207200	2269.9	0.133844	0.227356	14.8834	0.0005863	0.00332322	zinc finger protein, putative	protein_coding_gene
PF3D7_0303500	8096.93	0.133799	0.221727	25.9096	2.36481e-06	4.01244e-05	spindle pole body protein, putative	protein_coding_gene
PF3D7_1405100	5324.02	0.13371	0.272762	4.90368	0.0861351	0.152894	GTPase-activating protein, putative	protein_coding_gene
PF3D7_1367300	31.4035	0.133586	0.615192	0.38245	0.825947	0.862146	conserved Plasmodium protein, unknown function	protein_coding_gene
PF3D7_1315900	15130.1	0.133331	0.200856	4.22909	0.120688	0.198233	exportin-T, putative	protein_coding_gene
PF3D7_1346400	24951.7	0.132741	0.315272	16.1646	0.000308967	0.00196347	VPS13 domain-containing protein, putative	protein_coding_gene
PF3D7_1017600	16436.5	0.132729	0.251107	25.5088	2.88956e-06	4.66457e-05	conserved Plasmodium protein, unknown function	protein_coding_gene
PF3D7_1242200	8422.46	0.132717	0.217629	2.63603	0.267665	0.364851	queuine tRNA-ribosyltransferase, putative	protein_coding_gene
PF3D7_0526400	2776.66	0.132655	0.236623	4.94782	0.0842549	0.150305	conserved Plasmodium protein, unknown function	protein_coding_gene
PF3D7_1137600	52.8307	0.132649	0.646103	1.82821	0.400875	0.496859	conserved Plasmodium protein, unknown function	protein_coding_gene
PF3D7_1466300	56947.6	0.132282	0.220564	12.6876	0.00175759	0.00788034	26S proteasome regulatory subunit RPN2, putative	protein_coding_gene
PF3D7_0519100	4956.61	0.132207	0.213584	5.86736	0.053201	0.10669	50S ribosomal protein L14, mitochondrial, putative	protein_coding_gene
PF3D7_1420700	99647.7	0.132092	0.244854	0.528755	0.767684	0.816932	surface protein P113	protein_coding_gene
PF3D7_0928800	5158.34	0.132048	0.261366	2.27111	0.321243	0.420085	serine/threonine protein kinase, putative	protein_coding_gene
PF3D7_1235900	11814.3	0.131982	0.202891	0.423684	0.809093	0.848134	pre-mRNA-splicing factor SYF1, putative	protein_coding_gene
PF3D7_0807600	23212.2	0.131839	0.219913	17.9463	0.000126766	0.000956638	conserved Plasmodium protein, unknown function	protein_coding_gene
PF3D7_1460900	3030.8	0.13123	0.253079	8.37549	0.0151804	0.0412654	ribosomal protein S10, apicoplast, putative	protein_coding_gene
PF3D7_0613900	1824.84	0.130693	0.236134	43.1717	4.22073e-10	4.98046e-08	myosin E, putative	protein_coding_gene
PF3D7_1019700	4901.26	0.130381	0.191345	40.14	1.92179e-09	1.78178e-07	conserved Plasmodium protein, unknown function	protein_coding_gene
PF3D7_0703400	2168.71	0.130343	0.260751	0.272501	0.872624	0.90037	conserved Plasmodium protein, unknown function	protein_coding_gene
PF3D7_0105100	3172.67	0.129976	0.188593	0.628394	0.730375	0.787561	conserved Apicomplexan protein, unknown function	protein_coding_gene
PF3D7_1343200	14262	0.129814	0.184949	2.15295	0.340796	0.438951	tRNA guanosine-2'-O-methyltransferase, putative	protein_coding_gene
PF3D7_1435000	9184.61	0.129768	0.221752	5.23227	0.0730846	0.135762	cytochrome c oxidase assembly protein COX15, putative	protein_coding_gene
PF3D7_0705600	2889.99	0.129089	0.25587	14.53	0.000699589	0.00382746	RNA helicase, putative	protein_coding_gene
PF3D7_0602500	4505.08	0.12894	0.192203	0.639988	0.726153	0.784475	geranylgeranyl transferase type-2 subunit beta, putative	protein_coding_gene
PF3D7_1452300	1292.36	0.1288	0.218353	0.409701	0.814769	0.852535	DER1-like protein	protein_coding_gene
PF3D7_1351900	7630.57	0.12873	0.187873	0.52443	0.769346	0.818366	conserved protein, unknown function	protein_coding_gene
PF3D7_0533000	861.163	0.128526	0.22436	2.68252	0.261516	0.358446	rifin, pseudogene	pseudogene
PF3D7_0630300	8239.45	0.128304	0.23479	23.1374	9.4574e-06	0.000117471	DNA polymerase epsilon catalytic subunit A, putative	protein_coding_gene
PF3D7_0930200	868.711	0.128251	0.264807	0.24034	0.88677	0.910977	leucine-rich repeat protein	protein_coding_gene
PF3D7_1336400	3353.34	0.128168	0.200086	1.03058	0.597328	0.6742	RanBPM and CLTH-like protein, putative	protein_coding_gene
PF3D7_0108600	5778.81	0.128116	0.208974	1.75361	0.416111	0.510382	DnaJ domain-containing protein, putative	protein_coding_gene
PF3D7_1328000	6391.22	0.127916	0.247238	15.2721	0.000482728	0.00284163	conserved Plasmodium protein, unknown function	protein_coding_gene
PF3D7_0309000	4457.1	0.127615	0.227836	1.00107	0.606207	0.682295	dual specificity protein phosphatase	protein_coding_gene
PF3D7_1408700	28567.5	0.127372	0.251428	26.1855	2.06007e-06	3.5653e-05	conserved protein, unknown function	protein_coding_gene
PF3D7_1131200	2877.05	0.127167	0.236723	0.757143	0.684839	0.749468	conserved Plasmodium protein, unknown function	protein_coding_gene
PF3D7_0824700	2644.43	0.127068	0.279688	4.02748	0.133488	0.213977	lipase maturation factor, putative	protein_coding_gene
PF3D7_1230800	11080.1	0.126984	0.20001	10.9764	0.00413535	0.0150355	pre-mRNA-splicing regulator WTAP, putative	protein_coding_gene
PF3D7_1211500	2582.89	0.126919	0.186025	1.15569	0.561107	0.642822	ribosomal protein S18, mitochondrial	protein_coding_gene
PF3D7_1351300	61.2238	0.126728	0.47516	0.139299	0.932721	0.945283	conserved Plasmodium membrane protein, unknown function	protein_coding_gene
PF3D7_0219800	2095.85	0.126178	0.213006	2.16874	0.338114	0.43672	Plasmodium exported protein (PHISTc), unknown function	protein_coding_gene
PF3D7_0306100	7095.25	0.125954	0.18913	0.546655	0.760843	0.811483	conserved Plasmodium protein, unknown function	protein_coding_gene
PF3D7_0311900	981.096	0.125908	0.282204	0.337642	0.84466	0.877973	heptatricopeptide repeat-containing protein, putative	protein_coding_gene
PF3D7_1113800	5053	0.125654	0.212261	1.50058	0.472229	0.561956	conserved Plasmodium membrane protein, unknown function	protein_coding_gene
PF3D7_1332900	33730.9	0.125432	0.261969	0.233396	0.889854	0.913067	isoleucine--tRNA ligase, putative	protein_coding_gene
PF3D7_0932500	1875.52	0.12536	0.19828	0.426288	0.80804	0.847495	palmitoyltransferase DHHC6, putative	protein_coding_gene
PF3D7_1121100	9856.2	0.124688	0.20306	26.4199	1.83227e-06	3.31469e-05	conserved protein, unknown function	protein_coding_gene
PF3D7_1472600	2808.11	0.124619	0.25067	6.61219	0.0366591	0.0803775	protein disulfide-isomerase	protein_coding_gene
PF3D7_1218200	7741.4	0.124501	0.242651	13.5983	0.00111472	0.00555969	symplekin domain-containing protein, putative	protein_coding_gene
PF3D7_1320500	4144.32	0.124274	0.169204	1.73666	0.419651	0.513875	SNARE protein, putative	protein_coding_gene
PF3D7_0710700	7860.08	0.123718	0.241029	0.289932	0.865052	0.894335	conserved Plasmodium protein, unknown function	protein_coding_gene
PF3D7_0409200	15288.8	0.123713	0.189341	5.07902	0.0789049	0.143443	protein SOF1, putative	protein_coding_gene
PF3D7_1203100	2937.22	0.123703	0.231238	1.52294	0.466979	0.55743	conserved Plasmodium protein, unknown function	protein_coding_gene
PF3D7_1246800	22140.8	0.123505	0.191994	1.29199	0.524141	0.61044	signal recognition particle receptor subunit beta, putative	protein_coding_gene
PF3D7_1462300	28835.8	0.123349	0.203014	6.32516	0.0423164	0.08953	GTP-binding protein, putative	protein_coding_gene
PF3D7_1038000	98551.7	0.122763	0.176443	1.71338	0.424565	0.518303	antigen UB05	protein_coding_gene
PF3D7_0811100	1148.22	0.122504	0.217589	0.339095	0.844046	0.877511	mitochondrial carrier protein, putative	protein_coding_gene
PF3D7_1315100	818.91	0.122341	0.351081	6.02359	0.0492033	0.100525	serine/threonine protein kinase PK9	protein_coding_gene
PF3D7_0305700	16017.2	0.122306	0.180781	9.89141	0.0071139	0.0230702	ubiquitin-conjugating enzyme MMS2, putative	protein_coding_gene
PF3D7_1431900	496.638	0.121985	0.31242	1.81397	0.40374	0.499191	inner membrane complex suture component, putative	protein_coding_gene
PF3D7_1334400	176.255	0.121706	0.388435	0.792553	0.67282	0.740103	MSP7-like protein	protein_coding_gene
PF3D7_0907100	5469.17	0.121619	0.234618	1.42163	0.491243	0.579535	conserved Plasmodium protein, unknown function	protein_coding_gene
PF3D7_1001800	3759.57	0.121491	0.171214	11.8842	0.00262657	0.0107633	Plasmodium exported protein (PHISTc), unknown function	protein_coding_gene
PF3D7_0624200	5035.06	0.12142	0.217137	1.15573	0.561096	0.642822	SURP domain-containing protein, putative	protein_coding_gene
PF3D7_0714500	9135.31	0.121409	0.248241	1.21834	0.543803	0.627228	transcription elongation factor s-II, putative	protein_coding_gene
PF3D7_0903800	116.411	0.12132	0.401706	2.80941	0.24544	0.340364	LCCL domain-containing protein	protein_coding_gene
PF3D7_1439400	15395.4	0.121166	0.232131	7.98848	0.0184214	0.0480381	cytochrome b-c1 complex subunit Rieske, putative	protein_coding_gene
PF3D7_0323500	6014.95	0.120816	0.204901	0.424516	0.808756	0.847953	survival motor neuron-like protein	protein_coding_gene
[truncated: 3,515 more rows]
