# Supplementary material for: A Plasmodium falciparum MORC protein complex modulates epigenetic control of gene expression through interaction with heterochromatin
Source: eLife. 2024 Oct 16;12:RP92201. doi: 10.7554/eLife.92201 (PMC11483127; doi:10.7554/eLife.92201)
Supplement: Supplementary file 7. [file elife-92201-supp7.xlsx]

## Sheet: clusterprofilerResult_DEGs
#Supplementary File 7 -
#Gene Ontology (GO) Terms for differentially expressed genes identified in PfMORC-KD/PfMORC-WT RNAseq
ONTOLOGY	ID	Description	setSize	enrichmentScore	NES	pvalue	p.adjust	qvalues	rank	leading_edge	core_enrichment
GO:0044403	BP	GO:0044403	biological process involved in symbiotic interaction	17	-0.743672	-2.97729	0.000163854	0.000163854	0.00124244	36	tags=82%, list=22%, signal=72%	PF3D7_0700800/PF3D7_0713100/PF3D7_1480000/PF3D7_0223100/PF3D7_0222100/PF3D7_0701600/PF3D7_0732200/PF3D7_0324100/PF3D7_0324600/PF3D7_1000600/PF3D7_0114100/PF3D7_0400900/PF3D7_1041000/PF3D7_1200300
GO:0044419	BP	GO:0044419	biological process involved in interspecies interaction between organisms	17	-0.743672	-2.97729	0.000163854	0.000163854	0.00124244	36	tags=82%, list=22%, signal=72%	PF3D7_0700800/PF3D7_0713100/PF3D7_1480000/PF3D7_0223100/PF3D7_0222100/PF3D7_0701600/PF3D7_0732200/PF3D7_0324100/PF3D7_0324600/PF3D7_1000600/PF3D7_0114100/PF3D7_0400900/PF3D7_1041000/PF3D7_1200300
GO:0051701	BP	GO:0051701	biological process involved in interaction with host	17	-0.743672	-2.97729	0.000163854	0.000163854	0.00124244	36	tags=82%, list=22%, signal=72%	PF3D7_0700800/PF3D7_0713100/PF3D7_1480000/PF3D7_0223100/PF3D7_0222100/PF3D7_0701600/PF3D7_0732200/PF3D7_0324100/PF3D7_0324600/PF3D7_1000600/PF3D7_0114100/PF3D7_0400900/PF3D7_1041000/PF3D7_1200300
GO:0050896	BP	GO:0050896	response to stimulus	15	-0.651751	-2.49281	0.000164853	0.000164853	0.00124244	23	tags=60%, list=14%, signal=57%	PF3D7_1480000/PF3D7_0223100/PF3D7_1332100/PF3D7_0732200/PF3D7_1000600/PF3D7_0816800/PF3D7_0400900/PF3D7_1041000/PF3D7_1200300
GO:0009605	BP	GO:0009605	response to external stimulus	9	-0.775987	-2.44307	0.000170648	0.000170648	0.00124244	23	tags=78%, list=14%, signal=71%	PF3D7_1480000/PF3D7_0223100/PF3D7_0732200/PF3D7_1000600/PF3D7_0400900/PF3D7_1041000/PF3D7_1200300
GO:0009607	BP	GO:0009607	response to biotic stimulus	9	-0.775987	-2.44307	0.000170648	0.000170648	0.00124244	23	tags=78%, list=14%, signal=71%	PF3D7_1480000/PF3D7_0223100/PF3D7_0732200/PF3D7_1000600/PF3D7_0400900/PF3D7_1041000/PF3D7_1200300
GO:0020033	BP	GO:0020033	antigenic variation	9	-0.775987	-2.44307	0.000170648	0.000170648	0.00124244	23	tags=78%, list=14%, signal=71%	PF3D7_1480000/PF3D7_0223100/PF3D7_0732200/PF3D7_1000600/PF3D7_0400900/PF3D7_1041000/PF3D7_1200300
GO:0042783	BP	GO:0042783	evasion of host immune response	9	-0.775987	-2.44307	0.000170648	0.000170648	0.00124244	23	tags=78%, list=14%, signal=71%	PF3D7_1480000/PF3D7_0223100/PF3D7_0732200/PF3D7_1000600/PF3D7_0400900/PF3D7_1041000/PF3D7_1200300
GO:0043207	BP	GO:0043207	response to external biotic stimulus	9	-0.775987	-2.44307	0.000170648	0.000170648	0.00124244	23	tags=78%, list=14%, signal=71%	PF3D7_1480000/PF3D7_0223100/PF3D7_0732200/PF3D7_1000600/PF3D7_0400900/PF3D7_1041000/PF3D7_1200300
GO:0051707	BP	GO:0051707	response to other organism	9	-0.775987	-2.44307	0.000170648	0.000170648	0.00124244	23	tags=78%, list=14%, signal=71%	PF3D7_1480000/PF3D7_0223100/PF3D7_0732200/PF3D7_1000600/PF3D7_0400900/PF3D7_1041000/PF3D7_1200300
GO:0052173	BP	GO:0052173	response to defenses of other organism	9	-0.775987	-2.44307	0.000170648	0.000170648	0.00124244	23	tags=78%, list=14%, signal=71%	PF3D7_1480000/PF3D7_0223100/PF3D7_0732200/PF3D7_1000600/PF3D7_0400900/PF3D7_1041000/PF3D7_1200300
GO:0052200	BP	GO:0052200	response to host defenses	9	-0.775987	-2.44307	0.000170648	0.000170648	0.00124244	23	tags=78%, list=14%, signal=71%	PF3D7_1480000/PF3D7_0223100/PF3D7_0732200/PF3D7_1000600/PF3D7_0400900/PF3D7_1041000/PF3D7_1200300
GO:0052572	BP	GO:0052572	response to host immune response	9	-0.775987	-2.44307	0.000170648	0.000170648	0.00124244	23	tags=78%, list=14%, signal=71%	PF3D7_1480000/PF3D7_0223100/PF3D7_0732200/PF3D7_1000600/PF3D7_0400900/PF3D7_1041000/PF3D7_1200300
GO:0075136	BP	GO:0075136	response to host	9	-0.775987	-2.44307	0.000170648	0.000170648	0.00124244	23	tags=78%, list=14%, signal=71%	PF3D7_1480000/PF3D7_0223100/PF3D7_0732200/PF3D7_1000600/PF3D7_0400900/PF3D7_1041000/PF3D7_1200300
GO:0007155	BP	GO:0007155	cell adhesion	8	-0.719803	-2.16568	0.00103164	0.00103164	0.00515043	23	tags=75%, list=14%, signal=68%	PF3D7_1480000/PF3D7_0223100/PF3D7_0732200/PF3D7_0324600/PF3D7_0400900/PF3D7_1041000
GO:0020013	BP	GO:0020013	modulation by symbiont of host erythrocyte aggregation	8	-0.719803	-2.16568	0.00103164	0.00103164	0.00515043	23	tags=75%, list=14%, signal=68%	PF3D7_1480000/PF3D7_0223100/PF3D7_0732200/PF3D7_0324600/PF3D7_0400900/PF3D7_1041000
GO:0022610	BP	GO:0022610	biological adhesion	8	-0.719803	-2.16568	0.00103164	0.00103164	0.00515043	23	tags=75%, list=14%, signal=68%	PF3D7_1480000/PF3D7_0223100/PF3D7_0732200/PF3D7_0324600/PF3D7_0400900/PF3D7_1041000
GO:0034109	BP	GO:0034109	homotypic cell-cell adhesion	8	-0.719803	-2.16568	0.00103164	0.00103164	0.00515043	23	tags=75%, list=14%, signal=68%	PF3D7_1480000/PF3D7_0223100/PF3D7_0732200/PF3D7_0324600/PF3D7_0400900/PF3D7_1041000
GO:0034117	BP	GO:0034117	erythrocyte aggregation	8	-0.719803	-2.16568	0.00103164	0.00103164	0.00515043	23	tags=75%, list=14%, signal=68%	PF3D7_1480000/PF3D7_0223100/PF3D7_0732200/PF3D7_0324600/PF3D7_0400900/PF3D7_1041000
GO:0035821	BP	GO:0035821	modulation of process of other organism	8	-0.719803	-2.16568	0.00103164	0.00103164	0.00515043	23	tags=75%, list=14%, signal=68%	PF3D7_1480000/PF3D7_0223100/PF3D7_0732200/PF3D7_0324600/PF3D7_0400900/PF3D7_1041000
GO:0044003	BP	GO:0044003	modulation by symbiont of host process	8	-0.719803	-2.16568	0.00103164	0.00103164	0.00515043	23	tags=75%, list=14%, signal=68%	PF3D7_1480000/PF3D7_0223100/PF3D7_0732200/PF3D7_0324600/PF3D7_0400900/PF3D7_1041000
GO:0044068	BP	GO:0044068	modulation by symbiont of host cellular process	8	-0.719803	-2.16568	0.00103164	0.00103164	0.00515043	23	tags=75%, list=14%, signal=68%	PF3D7_1480000/PF3D7_0223100/PF3D7_0732200/PF3D7_0324600/PF3D7_0400900/PF3D7_1041000
GO:0051817	BP	GO:0051817	modulation of process of other organism involved in symbiotic interaction	8	-0.719803	-2.16568	0.00103164	0.00103164	0.00515043	23	tags=75%, list=14%, signal=68%	PF3D7_1480000/PF3D7_0223100/PF3D7_0732200/PF3D7_0324600/PF3D7_0400900/PF3D7_1041000
GO:0098609	BP	GO:0098609	cell-cell adhesion	8	-0.719803	-2.16568	0.00103164	0.00103164	0.00515043	23	tags=75%, list=14%, signal=68%	PF3D7_1480000/PF3D7_0223100/PF3D7_0732200/PF3D7_0324600/PF3D7_0400900/PF3D7_1041000
GO:0008150	BP	GO:0008150	biological_process	53	-0.362256	-2.06693	0.00158001	0.00158001	0.00766903	32	tags=36%, list=20%, signal=43%	PF3D7_1352600/PF3D7_0713100/PF3D7_0935700/PF3D7_0113400/PF3D7_1480000/PF3D7_0223100/PF3D7_1332100/PF3D7_0222100/PF3D7_0902500/PF3D7_0701600/PF3D7_0732200/PF3D7_0324100/PF3D7_0324600/PF3D7_1000600/PF3D7_0816800/PF3D7_0114100/PF3D7_0400900/PF3D7_1041000/PF3D7_1200300
GO:0042000	BP	GO:0042000	translocation of peptides or proteins into host	7	-0.708866	-2.03138	0.0026096	0.0026096	0.0119998	36	tags=86%, list=22%, signal=70%	PF3D7_0700800/PF3D7_0713100/PF3D7_0222100/PF3D7_0701600/PF3D7_0324100/PF3D7_0114100
GO:0044417	BP	GO:0044417	translocation of molecules into host	7	-0.708866	-2.03138	0.0026096	0.0026096	0.0119998	36	tags=86%, list=22%, signal=70%	PF3D7_0700800/PF3D7_0713100/PF3D7_0222100/PF3D7_0701600/PF3D7_0324100/PF3D7_0114100
GO:0020035	BP	GO:0020035	cytoadherence to microvasculature, mediated by symbiont protein	7	-0.688826	-1.97395	0.0033055	0.0033055	0.0144398	23	tags=71%, list=14%, signal=64%	PF3D7_1480000/PF3D7_0223100/PF3D7_0732200/PF3D7_0400900/PF3D7_1041000
GO:0044406	BP	GO:0044406	adhesion of symbiont to host	7	-0.688826	-1.97395	0.0033055	0.0033055	0.0144398	23	tags=71%, list=14%, signal=64%	PF3D7_1480000/PF3D7_0223100/PF3D7_0732200/PF3D7_0400900/PF3D7_1041000
GO:0008104	BP	GO:0008104	protein localization	8	-0.619487	-1.86386	0.00842503	0.00842503	0.0327148	36	tags=75%, list=22%, signal=61%	PF3D7_0700800/PF3D7_0713100/PF3D7_0222100/PF3D7_0701600/PF3D7_0324100/PF3D7_0114100
GO:0015031	BP	GO:0015031	protein transport	8	-0.619487	-1.86386	0.00842503	0.00842503	0.0327148	36	tags=75%, list=22%, signal=61%	PF3D7_0700800/PF3D7_0713100/PF3D7_0222100/PF3D7_0701600/PF3D7_0324100/PF3D7_0114100
GO:0045184	BP	GO:0045184	establishment of protein localization	8	-0.619487	-1.86386	0.00842503	0.00842503	0.0327148	36	tags=75%, list=22%, signal=61%	PF3D7_0700800/PF3D7_0713100/PF3D7_0222100/PF3D7_0701600/PF3D7_0324100/PF3D7_0114100
GO:0071705	BP	GO:0071705	nitrogen compound transport	8	-0.619487	-1.86386	0.00842503	0.00842503	0.0327148	36	tags=75%, list=22%, signal=61%	PF3D7_0700800/PF3D7_0713100/PF3D7_0222100/PF3D7_0701600/PF3D7_0324100/PF3D7_0114100
GO:0033036	BP	GO:0033036	macromolecule localization	9	-0.527947	-1.66215	0.0303754	0.0303754	0.100145	36	tags=67%, list=22%, signal=55%	PF3D7_0700800/PF3D7_0713100/PF3D7_0222100/PF3D7_0701600/PF3D7_0324100/PF3D7_0114100
GO:0071702	BP	GO:0071702	organic substance transport	9	-0.527947	-1.66215	0.0303754	0.0303754	0.100145	36	tags=67%, list=22%, signal=55%	PF3D7_0700800/PF3D7_0713100/PF3D7_0222100/PF3D7_0701600/PF3D7_0324100/PF3D7_0114100
GO:0006508	BP	GO:0006508	proteolysis	5	0.607915	1.59848	0.0430524	0.0430524	0.13198	41	tags=80%, list=25%, signal=62%	PF3D7_0507200/PF3D7_0207600/PF3D7_0404700/PF3D7_0207400
GO:0009987	BP	GO:0009987	cellular process	33	-0.316114	-1.59502	0.0473542	0.0473542	0.140246	32	tags=36%, list=20%, signal=37%	PF3D7_1352600/PF3D7_0935700/PF3D7_0113400/PF3D7_1480000/PF3D7_0223100/PF3D7_1332100/PF3D7_0902500/PF3D7_0732200/PF3D7_0324600/PF3D7_0816800/PF3D7_0400900/PF3D7_1041000
GO:0018995	CC	GO:0018995	host cellular component	42	-0.539742	-2.90808	0.000148082	0.000148082	0.00124244	54	tags=67%, list=33%, signal=60%	PF3D7_0424600/PF3D7_1001500/PF3D7_1302200/PF3D7_0830600/PF3D7_0829600/PF3D7_1040300/PF3D7_0408700/PF3D7_0502400/PF3D7_0700800/PF3D7_0936400/PF3D7_0713100/PF3D7_1480000/PF3D7_1039900/PF3D7_0223100/PF3D7_0222100/PF3D7_0902500/PF3D7_0701600/PF3D7_0732200/PF3D7_0324100/PF3D7_0324600/PF3D7_1000600/PF3D7_0936600/PF3D7_0114100/PF3D7_0601100/PF3D7_0400900/PF3D7_1041000/PF3D7_1101500/PF3D7_1200300
GO:0043657	CC	GO:0043657	host cell	42	-0.539742	-2.90808	0.000148082	0.000148082	0.00124244	54	tags=67%, list=33%, signal=60%	PF3D7_0424600/PF3D7_1001500/PF3D7_1302200/PF3D7_0830600/PF3D7_0829600/PF3D7_1040300/PF3D7_0408700/PF3D7_0502400/PF3D7_0700800/PF3D7_0936400/PF3D7_0713100/PF3D7_1480000/PF3D7_1039900/PF3D7_0223100/PF3D7_0222100/PF3D7_0902500/PF3D7_0701600/PF3D7_0732200/PF3D7_0324100/PF3D7_0324600/PF3D7_1000600/PF3D7_0936600/PF3D7_0114100/PF3D7_0601100/PF3D7_0400900/PF3D7_1041000/PF3D7_1101500/PF3D7_1200300
GO:0033643	CC	GO:0033643	host cell part	41	-0.553788	-2.96818	0.000148126	0.000148126	0.00124244	54	tags=68%, list=33%, signal=61%	PF3D7_0424600/PF3D7_1001500/PF3D7_1302200/PF3D7_0830600/PF3D7_0829600/PF3D7_1040300/PF3D7_0408700/PF3D7_0502400/PF3D7_0700800/PF3D7_0936400/PF3D7_0713100/PF3D7_1480000/PF3D7_1039900/PF3D7_0223100/PF3D7_0222100/PF3D7_0902500/PF3D7_0701600/PF3D7_0732200/PF3D7_0324100/PF3D7_0324600/PF3D7_1000600/PF3D7_0936600/PF3D7_0114100/PF3D7_0601100/PF3D7_0400900/PF3D7_1041000/PF3D7_1101500/PF3D7_1200300
GO:0030430	CC	GO:0030430	host cell cytoplasm	38	-0.507564	-2.66049	0.000148965	0.000148965	0.00124244	53	tags=66%, list=33%, signal=58%	PF3D7_1001500/PF3D7_1302200/PF3D7_0830600/PF3D7_0829600/PF3D7_1040300/PF3D7_0408700/PF3D7_0502400/PF3D7_0700800/PF3D7_0936400/PF3D7_0713100/PF3D7_1480000/PF3D7_1039900/PF3D7_0223100/PF3D7_0222100/PF3D7_0902500/PF3D7_0701600/PF3D7_0732200/PF3D7_0324100/PF3D7_0324600/PF3D7_0936600/PF3D7_0114100/PF3D7_0601100/PF3D7_0400900/PF3D7_1041000/PF3D7_1101500
GO:0033646	CC	GO:0033646	host intracellular part	38	-0.507564	-2.66049	0.000148965	0.000148965	0.00124244	53	tags=66%, list=33%, signal=58%	PF3D7_1001500/PF3D7_1302200/PF3D7_0830600/PF3D7_0829600/PF3D7_1040300/PF3D7_0408700/PF3D7_0502400/PF3D7_0700800/PF3D7_0936400/PF3D7_0713100/PF3D7_1480000/PF3D7_1039900/PF3D7_0223100/PF3D7_0222100/PF3D7_0902500/PF3D7_0701600/PF3D7_0732200/PF3D7_0324100/PF3D7_0324600/PF3D7_0936600/PF3D7_0114100/PF3D7_0601100/PF3D7_0400900/PF3D7_1041000/PF3D7_1101500
GO:0043656	CC	GO:0043656	host intracellular region	38	-0.507564	-2.66049	0.000148965	0.000148965	0.00124244	53	tags=66%, list=33%, signal=58%	PF3D7_1001500/PF3D7_1302200/PF3D7_0830600/PF3D7_0829600/PF3D7_1040300/PF3D7_0408700/PF3D7_0502400/PF3D7_0700800/PF3D7_0936400/PF3D7_0713100/PF3D7_1480000/PF3D7_1039900/PF3D7_0223100/PF3D7_0222100/PF3D7_0902500/PF3D7_0701600/PF3D7_0732200/PF3D7_0324100/PF3D7_0324600/PF3D7_0936600/PF3D7_0114100/PF3D7_0601100/PF3D7_0400900/PF3D7_1041000/PF3D7_1101500
GO:0033655	CC	GO:0033655	host cell cytoplasm part	37	-0.494469	-2.57456	0.00014941	0.00014941	0.00124244	64	tags=73%, list=39%, signal=57%	PF3D7_1401400/PF3D7_1001000/PF3D7_0936500/PF3D7_1001500/PF3D7_1302200/PF3D7_0830600/PF3D7_0829600/PF3D7_1040300/PF3D7_0408700/PF3D7_0502400/PF3D7_0700800/PF3D7_0713100/PF3D7_1480000/PF3D7_1039900/PF3D7_0223100/PF3D7_0222100/PF3D7_0902500/PF3D7_0701600/PF3D7_0732200/PF3D7_0324100/PF3D7_0324600/PF3D7_0936600/PF3D7_0114100/PF3D7_0601100/PF3D7_0400900/PF3D7_1041000/PF3D7_1101500
GO:0020036	CC	GO:0020036	Maurer's cleft	25	-0.606982	-2.79633	0.00015674	0.00015674	0.00124244	29	tags=60%, list=18%, signal=58%	PF3D7_0713100/PF3D7_1480000/PF3D7_1039900/PF3D7_0223100/PF3D7_0222100/PF3D7_0902500/PF3D7_0701600/PF3D7_0732200/PF3D7_0324100/PF3D7_0324600/PF3D7_0114100/PF3D7_0601100/PF3D7_0400900/PF3D7_1041000/PF3D7_1101500
GO:0033644	CC	GO:0033644	host cell membrane	11	-0.671775	-2.29287	0.000167616	0.000167616	0.00124244	23	tags=64%, list=14%, signal=59%	PF3D7_1480000/PF3D7_0223100/PF3D7_0732200/PF3D7_1000600/PF3D7_0400900/PF3D7_1041000/PF3D7_1200300
GO:0020002	CC	GO:0020002	host cell plasma membrane	9	-0.775987	-2.44307	0.000170648	0.000170648	0.00124244	23	tags=78%, list=14%, signal=71%	PF3D7_1480000/PF3D7_0223100/PF3D7_0732200/PF3D7_1000600/PF3D7_0400900/PF3D7_1041000/PF3D7_1200300
GO:0020005	CC	GO:0020005	symbiont-containing vacuole membrane	6	-0.636943	-1.71455	0.0172016	0.0172016	0.0639523	64	tags=100%, list=39%, signal=63%	PF3D7_1001500/PF3D7_1302200/PF3D7_0829600/PF3D7_0408700/PF3D7_0114100
GO:0032991	CC	GO:0032991	protein-containing complex	7	0.564103	1.72279	0.0220813	0.0220813	0.0803836	75	tags=100%, list=46%, signal=56%	PF3D7_1337700/PF3D7_1029900/PF3D7_1138000/PF3D7_0219200/PF3D7_1107600/PF3D7_1015900/PF3D7_0829500
GO:0020008	CC	GO:0020008	rhoptry	4	0.710692	1.69547	0.0245717	0.0245717	0.0858716	50	tags=100%, list=31%, signal=71%	PF3D7_1252100/PF3D7_0905400/PF3D7_0929400/PF3D7_0613300
GO:0020003	CC	GO:0020003	symbiont-containing vacuole	20	-0.389165	-1.66026	0.0344994	0.0344994	0.107648	64	tags=70%, list=39%, signal=48%	PF3D7_1401400/PF3D7_0936500/PF3D7_1001500/PF3D7_1302200/PF3D7_0829600/PF3D7_1040300/PF3D7_0408700/PF3D7_0502400/PF3D7_1480000/PF3D7_0223100/PF3D7_0732200/PF3D7_0114100/PF3D7_0400900/PF3D7_1041000
GO:0043230	CC	GO:0043230	extracellular organelle	20	-0.389165	-1.66026	0.0344994	0.0344994	0.107648	64	tags=70%, list=39%, signal=48%	PF3D7_1401400/PF3D7_0936500/PF3D7_1001500/PF3D7_1302200/PF3D7_0829600/PF3D7_1040300/PF3D7_0408700/PF3D7_0502400/PF3D7_1480000/PF3D7_0223100/PF3D7_0732200/PF3D7_0114100/PF3D7_0400900/PF3D7_1041000
GO:0065010	CC	GO:0065010	extracellular membrane-bounded organelle	20	-0.389165	-1.66026	0.0344994	0.0344994	0.107648	64	tags=70%, list=39%, signal=48%	PF3D7_1401400/PF3D7_0936500/PF3D7_1001500/PF3D7_1302200/PF3D7_0829600/PF3D7_1040300/PF3D7_0408700/PF3D7_0502400/PF3D7_1480000/PF3D7_0223100/PF3D7_0732200/PF3D7_0114100/PF3D7_0400900/PF3D7_1041000
GO:0005856	CC	GO:0005856	cytoskeleton	6	0.56051	1.60408	0.0439359	0.0439359	0.132366	75	tags=100%, list=46%, signal=56%	PF3D7_1337700/PF3D7_1138000/PF3D7_1107600/PF3D7_1412500/PF3D7_1015900/PF3D7_0829500
GO:0003674	MF	GO:0003674	molecular_function	72	0.316698	2.29365	0.000693722	0.000693722	0.00484875	75	tags=65%, list=46%, signal=63%	PF3D7_1452000/PF3D7_1252100/PF3D7_0507200/PF3D7_1007300/PF3D7_1426500/PF3D7_0930300/PF3D7_0207600/PF3D7_0604100/PF3D7_0905400/PF3D7_0404700/PF3D7_1337700/PF3D7_1145200/PF3D7_0704500/PF3D7_0526600/PF3D7_1029900/PF3D7_1235200/PF3D7_0528300/PF3D7_0508100/PF3D7_1232500/PF3D7_1035700/PF3D7_1214100/PF3D7_1372400/PF3D7_0828600/PF3D7_0419400/PF3D7_0522600/PF3D7_0207400/PF3D7_1141800/PF3D7_1206000/PF3D7_0…
GO:0140640	MF	GO:0140640	catalytic activity, acting on a nucleic acid	3	-0.85625	-1.75606	0.00661886	0.00661886	0.0282088	27	tags=100%, list=17%, signal=85%	PF3D7_0113400/PF3D7_0816800
GO:0005515	MF	GO:0005515	protein binding	25	0.348513	1.84569	0.00911099	0.00911099	0.0346092	78	tags=80%, list=48%, signal=49%	PF3D7_1452000/PF3D7_1252100/PF3D7_0507200/PF3D7_1007300/PF3D7_0930300/PF3D7_0905400/PF3D7_1337700/PF3D7_0508100/PF3D7_1035700/PF3D7_1141800/PF3D7_0403900/PF3D7_0806300/PF3D7_0628100/PF3D7_1138000/PF3D7_1107600/PF3D7_1149600/PF3D7_1115700/PF3D7_1015900/PF3D7_0829500/PF3D7_1302100
GO:0140096	MF	GO:0140096	catalytic activity, acting on a protein	16	0.389114	1.69639	0.0236382	0.0236382	0.0842953	70	tags=81%, list=43%, signal=51%	PF3D7_0507200/PF3D7_0207600/PF3D7_0404700/PF3D7_1145200/PF3D7_0704500/PF3D7_0207400/PF3D7_1206000/PF3D7_0805700/PF3D7_0403900/PF3D7_0628100/PF3D7_1236800/PF3D7_0902300/PF3D7_1115700
GO:0015075	MF	GO:0015075	ion transmembrane transporter activity	3	0.775	1.63096	0.0301047	0.0301047	0.100145	39	tags=100%, list=24%, signal=78%	PF3D7_1235200/PF3D7_0828600/PF3D7_0522600
