# Supplementary material for: A Plasmodium falciparum MORC protein complex modulates epigenetic control of gene expression through interaction with heterochromatin
Source: eLife. 2024 Oct 16;12:RP92201. doi: 10.7554/eLife.92201 (PMC11483127; doi:10.7554/eLife.92201)
Supplement: Supplementary file 8. [file elife-92201-supp8.xlsx]

## Sheet: Sheet1
#Supplementary File 8 -
# List of differentially expressed genes in PfMORC-KD vs PfMORC-WT after 100 nM melatonin treatment for 5 h
gene_id	baseMean	log2FoldChange	lfcSE	stat	pvalue	padj	gene_product	SO
PF3D7_0222300	17.1014	-5.22297	1.4148	11.0059	0.00407479	0.0784178	exported protein family 4, pseudogene	pseudogene
PF3D7_1149500	14.1697	-3.71691	1.42303	8.31086	0.0156791	0.17749	ring-infected erythrocyte surface antigen 2, pseudogene	pseudogene
PF3D7_1460000	19.5267	-2.43858	1.07955	6.34402	0.0419193	0.29949	biotin--protein ligase 2	protein_coding_gene
PF3D7_1478400	27.1497	-2.2292	0.872882	7.49851	0.0235353	0.219129	Plasmodium exported protein, unknown function, pseudogene	pseudogene
PF3D7_0324700	47.2044	-2.06671	0.981937	7.37799	0.0249971	0.226772	erythrocyte membrane protein 1 (PfEMP1), exon 2, pseudogene	pseudogene
PF3D7_0307000	11.7468	-2.01263	1.32557	9.79396	0.0074691	0.116729	small nucleolar RNA snoR03	ncRNA_gene
PF3D7_0819400	33.0223	-1.86206	0.693453	7.2347	0.0268537	0.23421	perforin-like protein 4	protein_coding_gene
PF3D7_1425000	74.9586	-1.83162	0.643353	12.9256	0.00156043	0.0403277	Plasmodium RNA of unknown function RUF4	ncRNA_gene
PF3D7_1146800	216.715	-1.79961	0.358498	26.331	1.9156e-06	0.000461223	conserved Plasmodium protein, unknown function	protein_coding_gene
PF3D7_0629000	133.953	-1.78472	0.638845	11.5138	0.00316092	0.065796	glucosamine 6-phosphate N-acetyltransferase	protein_coding_gene
PF3D7_0221500	35.9624	-1.77547	0.710137	9.76835	0.00756536	0.117494	Pfmc-2TM Maurer's cleft two transmembrane protein, pseudogene	pseudogene
PF3D7_1477900	108.092	-1.76067	0.4195	16.8945	0.000214493	0.0108227	acyl-CoA synthetase, pseudogene	pseudogene
PF3D7_1474200	1927.76	-1.74015	0.324269	27.9754	8.41816e-07	0.000234734	conserved Plasmodium membrane protein, unknown function	protein_coding_gene
PF3D7_1461800	826.927	-1.70779	0.303068	51.127	7.90511e-12	4.18813e-08	conserved Plasmodium protein, unknown function	protein_coding_gene
PF3D7_0902500	1692.97	-1.59355	0.268398	45.7949	1.13698e-10	3.01186e-07	serine/threonine protein kinase, FIKK family	protein_coding_gene
PF3D7_0502400	589.926	-1.59105	0.280132	43.8868	2.95198e-10	5.21319e-07	merozoite surface protein 8	protein_coding_gene
PF3D7_0700800	617.51	-1.57627	0.374402	28.928	5.22845e-07	0.000184669	Pfmc-2TM Maurer's cleft two transmembrane protein	protein_coding_gene
PF3D7_1480000	275.272	-1.53089	0.351334	19.5578	5.66339e-05	0.00468822	rifin	protein_coding_gene
PF3D7_1000600	748.882	-1.52941	0.279503	30.9548	1.8978e-07	0.000121361	rifin	protein_coding_gene
PF3D7_0935700	1557.37	-1.50674	0.271558	38.8447	3.67264e-09	4.15442e-06	Plasmodium exported protein, unknown function	protein_coding_gene
PF3D7_0424200	254.713	-1.48474	0.605671	6.43556	0.0400439	0.293063	reticulocyte binding protein homologue 4	protein_coding_gene
PF3D7_1311100	150.269	-1.47131	0.430261	17.7403	0.000140521	0.00775503	meiosis-specific nuclear structural protein 1, putative	protein_coding_gene
PF3D7_1371500	533.774	-1.46946	0.504505	21.254	2.42526e-05	0.00273967	probable protein, unknown function	protein_coding_gene
PF3D7_0220400	166.561	-1.45005	0.460228	9.6253	0.00812631	0.12361	DnaJ protein, putative, pseudogene	pseudogene
PF3D7_0113400	363.887	-1.44857	0.350698	17.9125	0.000128927	0.00734466	Plasmodium exported protein, unknown function	protein_coding_gene
PF3D7_1300900	20.6402	-1.41331	1.16151	7.93467	0.0189238	0.1962	stevor	protein_coding_gene
PF3D7_0927200	274.583	-1.40818	0.333726	19.2357	6.65318e-05	0.00510848	zinc finger protein, putative	protein_coding_gene
PF3D7_1401100	8438.16	-1.36619	0.272406	26.2357	2.00909e-06	0.000461223	DnaJ protein, putative	protein_coding_gene
PF3D7_0601700	1124.49	-1.36066	0.271469	30.2423	2.71001e-07	0.000131168	Plasmodium exported protein (PHISTa), unknown function, pseudogene	pseudogene
PF3D7_0936600	28379.7	-1.3582	0.383715	16.7653	0.0002288	0.0113968	gametocyte exported protein 5	protein_coding_gene
PF3D7_0632500	724.276	-1.35548	0.342795	14.9686	0.000561848	0.0208159	erythrocyte membrane protein 1, PfEMP1	protein_coding_gene
PF3D7_1322400	192.14	-1.3441	0.386824	14.8835	0.000586265	0.0213593	conserved Plasmodium protein, unknown function	protein_coding_gene
PF3D7_0114000	741.615	-1.33274	0.518568	7.95419	0.01874	0.195827	exported protein family 1	protein_coding_gene
PF3D7_0936900	6556.66	-1.32088	0.276969	24.0925	5.86644e-06	0.0011954	Plasmodium exported protein (PHISTb), unknown function, pseudogene	pseudogene
PF3D7_1301800	324.002	-1.31934	0.542014	10.2985	0.0058039	0.100487	surface-associated interspersed protein 13.1 (SURFIN 13.1), pseudogene	pseudogene
PF3D7_0830600	4051.5	-1.31503	0.291869	29.0157	5.00399e-07	0.000184669	Plasmodium exported protein (PHISTc), unknown function	protein_coding_gene
PF3D7_0209000	123.198	-1.31429	0.462392	8.73919	0.0126564	0.155577	6-cysteine protein P230	protein_coding_gene
PF3D7_0601500	836.945	-1.30703	0.3755	16.0371	0.000329304	0.0145388	Plasmodium exported protein (PHISTb), unknown function	protein_coding_gene
PF3D7_1477600	219.308	-1.29419	0.370471	12.3995	0.00202994	0.0484443	surface-associated interspersed protein 14.1 (SURFIN 14.1)	protein_coding_gene
PF3D7_0628400	159.619	-1.28686	0.433212	8.60218	0.0135537	0.162726	protease, putative	protein_coding_gene
PF3D7_0929800	101.455	-1.2833	0.8193	15.3464	0.00046512	0.0180518	conserved Plasmodium protein, unknown function	protein_coding_gene
PF3D7_0900400	49.8102	-1.27947	0.604463	7.87962	0.0194519	0.198968	rifin	protein_coding_gene
PF3D7_1039100	385.754	-1.26297	0.310842	16.0504	0.00032712	0.0145388	DnaJ protein, putative, pseudogene	pseudogene
PF3D7_1150400	7302.78	-1.22595	0.330117	13.9826	0.000919852	0.0280445	erythrocyte membrane protein 1, PfEMP1	protein_coding_gene
PF3D7_0800600	121.654	-1.20986	0.466803	7.13317	0.0282522	0.24142	Plasmodium exported protein (PHISTa), unknown function	protein_coding_gene
PF3D7_0600200	5919.93	-1.20749	0.265625	21.2264	2.45888e-05	0.00273967	erythrocyte membrane protein 1, PfEMP1	protein_coding_gene
PF3D7_1149600	2292.35	-1.20238	0.283622	19.2015	6.76796e-05	0.00512238	DnaJ protein, putative	protein_coding_gene
PF3D7_1372000	281.353	-1.19289	0.392999	28.2135	7.47321e-07	0.000219962	Plasmodium exported protein (PHISTa), unknown function	protein_coding_gene
PF3D7_1465500	58.7558	-1.19256	0.61296	8.43085	0.014766	0.172314	potassium channel K2	protein_coding_gene
PF3D7_1126800	534.44	-1.19174	0.290629	23.6612	7.27857e-06	0.00135386	alternative splicing factor SR-MG, putative	protein_coding_gene
PF3D7_0936800	25721.2	-1.18051	0.262216	30.2324	2.72339e-07	0.000131168	Plasmodium exported protein (PHISTc), unknown function	protein_coding_gene
PF3D7_0223100	243.246	-1.1796	0.505971	17.8325	0.000134193	0.00748375	rifin	protein_coding_gene
PF3D7_0814500	1384.99	-1.17556	0.417787	10.4447	0.00539475	0.0952221	conserved protein, unknown function	protein_coding_gene
PF3D7_1442800	148.132	-1.17409	0.715961	9.32437	0.00944581	0.134166	conserved Plasmodium protein, unknown function	protein_coding_gene
PF3D7_1421800	679.005	-1.17064	0.317884	13.47	0.00118859	0.033031	conserved Plasmodium protein, unknown function	protein_coding_gene
PF3D7_1466200	4276.92	-1.16827	0.368535	12.8351	0.00163268	0.0412092	homeodomain-like protein HDP1	protein_coding_gene
PF3D7_1420100	375.978	-1.16288	0.346892	12.0715	0.00239173	0.0546181	conserved Plasmodium protein, unknown function	protein_coding_gene
PF3D7_0831900	2924.04	-1.16136	0.318154	17.1375	0.00018995	0.00977045	Plasmodium exported protein (PHIST), unknown function, pseudogene	pseudogene
PF3D7_0830500	4552.85	-1.1502	0.503048	11.1662	0.00376091	0.0743481	sporozoite and liver stage tryptophan-rich protein, putative	protein_coding_gene
PF3D7_1141100	871.987	-1.14571	0.329425	14.4865	0.000714969	0.0241236	conserved Plasmodium protein, unknown function	protein_coding_gene
PF3D7_1409500	742.787	-1.14552	0.35018	10.9276	0.0042375	0.0805897	conserved Plasmodium protein, unknown function	protein_coding_gene
PF3D7_0702100	287.609	-1.14222	0.503781	10.7308	0.00467569	0.0851264	Plasmodium exported protein (PHISTb), unknown function, pseudogene	pseudogene
PF3D7_0319700	7700.79	-1.13528	0.285043	17.6901	0.000144096	0.00787032	ABC transporter I family member 1, putative	protein_coding_gene
PF3D7_0402300	848.758	-1.11849	0.287845	18.5141	9.54372e-05	0.00616618	reticulocyte binding protein homologue 1	protein_coding_gene
PF3D7_0708200	326.304	-1.11841	0.314714	13.502	0.00116971	0.0327891	conserved Plasmodium protein, unknown function	protein_coding_gene
PF3D7_0202300	1540.32	-1.11293	0.365403	10.9245	0.00424396	0.0805897	Plasmodium exported protein (hyp11), unknown function	protein_coding_gene
PF3D7_0702300	439.216	-1.10419	0.386489	21.7343	1.90746e-05	0.00259121	sporozoite threonine and asparagine-rich protein	protein_coding_gene
PF3D7_0701600	203.887	-1.09872	0.460878	18.8345	8.13096e-05	0.00559452	Pfmc-2TM Maurer's cleft two transmembrane protein	protein_coding_gene
PF3D7_1023100	470.832	-1.08934	0.37156	8.47719	0.0144278	0.169487	dynein heavy chain, putative	protein_coding_gene
PF3D7_0425800	499.652	-1.0873	0.388519	7.67569	0.02154	0.209142	erythrocyte membrane protein 1, PfEMP1	protein_coding_gene
PF3D7_0101100	275.798	-1.08207	0.427012	14.8755	0.000588609	0.0213593	exported protein family 4	protein_coding_gene
PF3D7_1201200	3331.67	-1.08194	0.302562	20.9163	2.87132e-05	0.00296246	Plasmodium exported protein (PHISTa-like), unknown function	protein_coding_gene
PF3D7_1122600	408.232	-1.07758	0.381154	8.30238	0.0157456	0.17749	conserved Plasmodium protein, unknown function	protein_coding_gene
PF3D7_1039000	8591.88	-1.07561	0.24887	34.8174	2.75102e-08	2.42915e-05	serine/threonine protein kinase, FIKK family	protein_coding_gene
PF3D7_1477000	99.6464	-1.06907	0.441089	18.0234	0.000121973	0.00731183	Plasmodium exported protein (hyp17), unknown function, pseudogene	pseudogene
PF3D7_0730900	21609.2	-1.06576	0.265395	32.7375	7.78311e-08	5.8907e-05	EMP1-trafficking protein	protein_coding_gene
PF3D7_0605600	416.186	-1.06037	0.331635	12.3444	0.00208662	0.0493524	nucleoside diphosphate kinase, putative	protein_coding_gene
PF3D7_1200600	64015.2	-1.05924	0.296889	13.9078	0.000954895	0.0289088	erythrocyte membrane protein 1, PfEMP1	protein_coding_gene
PF3D7_1325800	3311.77	-1.05873	0.264013	29.7752	3.42284e-07	0.000151119	conserved Plasmodium protein, unknown function	protein_coding_gene
PF3D7_0936400	3455.09	-1.05608	0.358919	11.2503	0.00360604	0.0719861	ring-exported protein 4	protein_coding_gene
PF3D7_1244400	17884.7	-1.05444	0.338601	14.0001	0.000911827	0.0280445	RNA-binding protein, putative	protein_coding_gene
PF3D7_0418000	2008.69	-1.05381	0.294025	16.3711	0.000278652	0.01295	conserved Plasmodium protein, unknown function	protein_coding_gene
PF3D7_0100300	4240.67	-1.05326	0.317187	11.0992	0.00388906	0.0760304	erythrocyte membrane protein 1, PfEMP1	protein_coding_gene
PF3D7_1240200	412.264	-1.05057	0.322809	14.1023	0.000866406	0.0276461	erythrocyte membrane protein 1 (PfEMP1), pseudogene	pseudogene
PF3D7_1236200	21885.1	-1.03416	0.307189	14.6836	0.000647899	0.0225827	conserved Plasmodium protein, unknown function	protein_coding_gene
PF3D7_0902300	1372.57	-1.03096	0.366947	9.64565	0.00804403	0.122816	serine/threonine protein kinase, FIKK family	protein_coding_gene
PF3D7_0214500	869.61	-1.03018	0.366947	21.4121	2.24092e-05	0.00273967	conserved Plasmodium protein, unknown function	protein_coding_gene
PF3D7_1128600	1797.42	-1.02757	0.250557	16.7005	0.000236335	0.0113968	CCR4-NOT transcription complex subunit 2, putative	protein_coding_gene
PF3D7_1474000	1215.6	-1.02434	0.312441	22.9629	1.03196e-05	0.00176366	conserved Plasmodium protein, unknown function	protein_coding_gene
PF3D7_0222100	339.672	-1.0223	0.491657	11.4636	0.0032412	0.0670776	Pfmc-2TM Maurer's cleft two transmembrane protein	protein_coding_gene
PF3D7_0101300	106.251	-1.01945	0.60077	7.21899	0.0270655	0.234686	Pfmc-2TM Maurer's cleft two transmembrane protein	protein_coding_gene
PF3D7_1212900	30618.2	-1.01724	0.252723	16.6981	0.000236627	0.0113968	bromodomain protein 2, putative	protein_coding_gene
PF3D7_0301600	13593.6	-1.01307	0.256257	15.6098	0.000407739	0.0167458	Plasmodium exported protein (hyp1), unknown function	protein_coding_gene
PF3D7_0510300	347.707	-1.01067	0.381632	9.29938	0.00956459	0.135154	stripes inner membrane complex protein, putative	protein_coding_gene
PF3D7_0417100	188.985	-1.01034	0.41826	7.2386	0.0268014	0.23421	mRNA-binding protein PUF2	protein_coding_gene
PF3D7_0831000	658.35	-1.00594	0.283454	13.5612	0.00113562	0.0320118	Plasmodium exported protein (PHISTb), unknown function	protein_coding_gene
PF3D7_0631100	1209.4	-1.00536	0.308335	13.3114	0.00128666	0.0346025	Plasmodium exported protein (PHISTb), unknown function	protein_coding_gene
PF3D7_0324100	39.8142	-1.00325	0.684576	9.49399	0.00867774	0.126304	Pfmc-2TM Maurer's cleft two transmembrane protein	protein_coding_gene
PF3D7_1000100	619.746	-1.00236	0.269964	17.3515	0.000170671	0.00904217	erythrocyte membrane protein 1, PfEMP1	protein_coding_gene
PF3D7_0215300	295.83	-1.0012	0.315233	12.2231	0.00221713	0.0515883	acyl-CoA synthetase	protein_coding_gene
PF3D7_0314700	18118.8	-0.99658	0.225933	19.4699	5.91799e-05	0.00482362	RING finger protein RNF1	protein_coding_gene
PF3D7_1026600	5439.39	-0.994313	0.363247	17.9675	0.000125432	0.00731183	conserved Plasmodium protein, unknown function	protein_coding_gene
PF3D7_0726200	6929.06	-0.994024	0.251182	22.4798	1.31393e-05	0.00210946	serine/threonine protein kinase, FIKK family	protein_coding_gene
PF3D7_0424900	100.946	-0.985462	0.487596	8.79318	0.0123193	0.153829	Plasmodium exported protein (PHISTa), unknown function	protein_coding_gene
PF3D7_0408700	292.745	-0.985082	0.391137	6.8891	0.0319191	0.258179	perforin-like protein 1	protein_coding_gene
PF3D7_1352900	737.975	-0.98364	0.43735	8.51183	0.0141801	0.168191	Plasmodium exported protein, unknown function	protein_coding_gene
PF3D7_0601200	505.316	-0.982902	0.354815	18.9079	7.83778e-05	0.00549352	Pfmc-2TM Maurer's cleft two transmembrane protein	protein_coding_gene
PF3D7_1107600	148.706	-0.979712	0.457655	6.5369	0.0380653	0.284505	conserved Plasmodium protein, unknown function	protein_coding_gene
PF3D7_1362700	13970.8	-0.975377	0.259127	25.8758	2.40518e-06	0.000509705	conserved Plasmodium protein, unknown function	protein_coding_gene
PF3D7_1140700	7677.69	-0.974617	0.285544	15.3279	0.00046946	0.0180518	chromo domain-containing protein, putative	protein_coding_gene
PF3D7_0713200	461.724	-0.974343	0.371477	15.7	0.000389751	0.0163881	exported protein family 1	protein_coding_gene
PF3D7_0626200	721.28	-0.9658	0.579988	11.3626	0.00340911	0.0694672	conserved Plasmodium protein, unknown function	protein_coding_gene
PF3D7_0626500	156.641	-0.963785	0.380157	6.74079	0.0343761	0.268392	centrosomal protein CEP135, putative	protein_coding_gene
PF3D7_1016200	2597.77	-0.96339	0.490992	6.53365	0.0381274	0.284505	Rab3 GTPase-activating protein non-catalytic subunit, putative	protein_coding_gene
PF3D7_1040300	258.142	-0.961226	0.410084	10.4973	0.00525453	0.0941066	rifin	protein_coding_gene
PF3D7_0424700	4764.18	-0.958651	0.339631	16.0587	0.000325761	0.0145388	serine/threonine protein kinase, FIKK family	protein_coding_gene
PF3D7_1355200	378.834	-0.954223	0.393698	7.19279	0.0274224	0.237392	RAP protein, putative	protein_coding_gene
PF3D7_1222600	202.09	-0.953522	0.36122	13.0052	0.00149953	0.0389437	AP2 domain transcription factor AP2-G	protein_coding_gene
PF3D7_1032900	2611.15	-0.952871	0.350304	7.29961	0.0259962	0.22993	RNA polymerase II-associated protein 1, putative	protein_coding_gene
PF3D7_1420300	1202.19	-0.952839	0.311977	9.87914	0.00715766	0.113537	DNL-type zinc finger protein	protein_coding_gene
PF3D7_1416400	257.333	-0.950148	0.364122	9.16794	0.0102143	0.139312	conserved protein, unknown function	protein_coding_gene
PF3D7_1355600	1896.54	-0.941491	0.265191	14.7547	0.000625269	0.0220845	PhIL1 interacting protein PIP1	protein_coding_gene
PF3D7_0422000	10886.9	-0.941059	0.264124	12.8455	0.0016242	0.0412092	steroid dehydrogenase, putative	protein_coding_gene
PF3D7_1002300	591.451	-0.934992	0.302306	9.7962	0.00746076	0.116729	conserved Plasmodium protein, unknown function	protein_coding_gene
PF3D7_0726100	2847.12	-0.934275	0.239776	15.3466	0.000465076	0.0180518	Plasmodium exported protein, unknown function	protein_coding_gene
PF3D7_0609700	7065.06	-0.932633	0.301129	15.3247	0.000470205	0.0180518	protein KIC6	protein_coding_gene
PF3D7_0315200	400.039	-0.92547	0.566445	11.7315	0.0028349	0.0608069	circumsporozoite- and TRAP-related protein	protein_coding_gene
PF3D7_1305700	2309.72	-0.925454	0.279406	10.8818	0.00433563	0.0817443	conserved Plasmodium protein, unknown function	protein_coding_gene
PF3D7_1473700	3641.71	-0.923125	0.376592	8.05525	0.0178166	0.189508	nucleoporin NUP116/NSP116, putative	protein_coding_gene
PF3D7_1041000	17.9719	-0.917355	1.01171	6.13188	0.04661	0.312978	rifin	protein_coding_gene
PF3D7_1427100	6223.71	-0.913091	0.241758	19.7563	5.12832e-05	0.00441109	lipase, putative	protein_coding_gene
PF3D7_1016700	3230.91	-0.912986	0.230763	19.3113	6.4064e-05	0.00503685	Plasmodium exported protein (PHISTc), unknown function	protein_coding_gene
PF3D7_0211100	786.459	-0.91101	0.376705	6.97546	0.0305702	0.252085	conserved Plasmodium protein, unknown function	protein_coding_gene
PF3D7_1134600	3320.15	-0.909847	0.268553	15.9018	0.000352348	0.0150543	zinc finger protein, putative	protein_coding_gene
PF3D7_0424500	1692.87	-0.909537	0.317177	9.48284	0.00872625	0.126662	serine/threonine protein kinase, FIKK family	protein_coding_gene
PF3D7_0219700	1374.87	-0.904387	0.253736	15.3446	0.000465541	0.0180518	Plasmodium exported protein (PHISTc), unknown function	protein_coding_gene
PF3D7_1478900	1952.75	-0.898097	0.409365	8.35976	0.0153003	0.175457	non-coding RNA	ncRNA_gene
PF3D7_1038100	2352.32	-0.898079	0.313031	8.36829	0.0152352	0.175457	GDP dissociation inhibitor, putative	protein_coding_gene
PF3D7_0214300	1489.38	-0.896512	0.326004	20.8531	2.96358e-05	0.00296246	conserved Plasmodium protein, unknown function	protein_coding_gene
PF3D7_1476000	1203.66	-0.893983	0.267939	16.0153	0.000332913	0.0145766	conserved Plasmodium protein, unknown function	protein_coding_gene
PF3D7_0602800	742.07	-0.891206	0.347931	6.32966	0.0422212	0.30019	JmjC domain-containing protein 2, putative	protein_coding_gene
PF3D7_0906400	174.503	-0.889683	0.390692	8.3254	0.0155655	0.17726	dynein intermediate light chain, putative	protein_coding_gene
PF3D7_1235800	1312.8	-0.884616	0.319492	8.4985	0.0142749	0.168814	peptidase, putative	protein_coding_gene
PF3D7_0623800	9708.1	-0.884146	0.249574	18.3547	0.000103355	0.00659726	tyrosine kinase-like protein, putative	protein_coding_gene
PF3D7_0518700	1447.68	-0.884144	0.260429	14.89	0.000584358	0.0213593	mRNA-binding protein PUF1	protein_coding_gene
PF3D7_0402200	741.711	-0.883428	0.337232	19.2931	6.46482e-05	0.00503685	surface-associated interspersed protein 4.1 (SURFIN 4.1), pseudogene	pseudogene
PF3D7_0711700	927.843	-0.882112	0.315226	8.18376	0.0167078	0.183921	erythrocyte membrane protein 1, PfEMP1	protein_coding_gene
PF3D7_0505000	4306.71	-0.878543	0.266201	13.7617	0.00102727	0.0300688	MMS19-like protein, putative	protein_coding_gene
PF3D7_0509400	16440.3	-0.875797	0.294938	10.361	0.00562511	0.0983559	RNA polymerase I	protein_coding_gene
PF3D7_1440500	5975.41	-0.875426	0.252243	11.8163	0.00271725	0.0595226	allantoicase, putative	protein_coding_gene
PF3D7_0713100	890.202	-0.875229	0.34951	15.2374	0.000491184	0.0187215	Pfmc-2TM Maurer's cleft two transmembrane protein	protein_coding_gene
PF3D7_0420700	529.892	-0.873145	0.321612	8.76068	0.0125211	0.155356	erythrocyte membrane protein 1, PfEMP1	protein_coding_gene
PF3D7_1450200	449.545	-0.872092	0.280829	10.2876	0.00583551	0.100705	conserved Plasmodium protein, unknown function	protein_coding_gene
PF3D7_0517500	361.2	-0.871775	0.357625	6.22174	0.0445621	0.307409	UTP--glucose-1-phosphate uridylyltransferase, putative	protein_coding_gene
PF3D7_1411000	1089.22	-0.870897	0.356887	14.28	0.000792767	0.0260875	conserved Plasmodium protein, unknown function	protein_coding_gene
PF3D7_1358300	456.401	-0.87054	0.36125	12.6081	0.00182886	0.0445411	rhomboid protease ROM7, putative	protein_coding_gene
PF3D7_1102700	10384.5	-0.866019	0.348645	7.34352	0.0254317	0.22734	early transcribed membrane protein 11.1	protein_coding_gene
PF3D7_0801900	7939.06	-0.865215	0.269598	14.086	0.000873496	0.0276461	lysine-specific histone demethylase, putative	protein_coding_gene
PF3D7_1221900	2145.03	-0.863906	0.254789	20.1728	4.16431e-05	0.00401136	conserved Plasmodium membrane protein, unknown function	protein_coding_gene
PF3D7_0601000	663.435	-0.863841	0.288219	14.7983	0.000611772	0.0218998	exported protein family 4	protein_coding_gene
PF3D7_0725300	6105.44	-0.862213	0.26869	10.1281	0.00632002	0.10596	conserved protein, unknown function	protein_coding_gene
PF3D7_1114000	353.837	-0.861543	0.356251	6.45173	0.0397214	0.291878	dynein light chain Tctex-type, putative	protein_coding_gene
PF3D7_0935900	7104.9	-0.857532	0.323166	19.9717	4.60469e-05	0.00427994	ring-exported protein 1	protein_coding_gene
PF3D7_0424600	44931	-0.854955	0.349083	7.12155	0.0284167	0.242435	Plasmodium exported protein (PHISTb)	protein_coding_gene
PF3D7_0703900	10130.4	-0.853819	0.276498	13.7328	0.0010422	0.0302015	conserved Plasmodium membrane protein, unknown function	protein_coding_gene
PF3D7_0936300	2125.08	-0.849395	0.275364	21.2965	2.37419e-05	0.00273967	ring-exported protein 3	protein_coding_gene
PF3D7_1333600	6014.44	-0.847796	0.297243	9.18725	0.0101161	0.138848	U3 small nucleolar RNA-associated protein 4, putative	protein_coding_gene
PF3D7_1471700	155.305	-0.847222	0.421578	6.96525	0.0307266	0.25209	conserved Plasmodium protein, unknown function	protein_coding_gene
PF3D7_1301400	5025.54	-0.845182	0.274331	22.4193	1.35425e-05	0.00211025	Plasmodium exported protein (hyp12), unknown function	protein_coding_gene
PF3D7_1405900	5475.97	-0.842254	0.249774	17.9431	0.00012697	0.00731183	RNA-binding protein, putative	protein_coding_gene
PF3D7_1425600	1028.73	-0.840056	0.337678	6.03051	0.0490332	0.320664	zinc finger protein, putative	protein_coding_gene
PF3D7_1372300	1073.49	-0.837669	0.277459	9.29757	0.00957321	0.135154	Plasmodium exported protein (PHIST), unknown function	protein_coding_gene
PF3D7_1149000	39009.2	-0.834743	0.290257	9.4098	0.00905081	0.130657	antigen 332, DBL-like protein	protein_coding_gene
PF3D7_0603600	1722.33	-0.833479	0.294097	11.1772	0.00374033	0.0742183	AT-rich interactive domain-containing protein, putative	protein_coding_gene
PF3D7_0713300	609.994	-0.824381	0.36217	15.5379	0.00042265	0.0170931	erythrocyte membrane protein 1 (PfEMP1), pseudogene	pseudogene
PF3D7_1317200	8816.11	-0.82408	0.319899	9.59361	0.00825607	0.124263	AP2 domain transcription factor AP2-FG, putative	protein_coding_gene
PF3D7_0936700	458.818	-0.820524	0.367717	10.0202	0.00667028	0.109159	lysophospholipase, putative	protein_coding_gene
PF3D7_1240600	2026.99	-0.819684	0.328669	6.74227	0.0343506	0.268392	erythrocyte membrane protein 1, PfEMP1	protein_coding_gene
PF3D7_1001500	8095.49	-0.818624	0.324156	10.1961	0.00610851	0.103727	early transcribed membrane protein 10.1	protein_coding_gene
PF3D7_1413200	1122.84	-0.818321	0.297821	19.0589	7.2679e-05	0.00534797	conserved Plasmodium protein, unknown function	protein_coding_gene
PF3D7_1029200	1312.06	-0.815141	0.314985	6.59727	0.0369336	0.279391	WD repeat-containing protein, putative	protein_coding_gene
PF3D7_1471600	244.405	-0.813754	0.412979	7.85142	0.0197281	0.198968	apical polar ring protein APR2, putative	protein_coding_gene
PF3D7_1302100	27258.9	-0.812131	0.46374	11.2527	0.00360175	0.0719861	gamete antigen 27/25	protein_coding_gene
PF3D7_0412400	1545.06	-0.811883	0.33616	6.02269	0.0492255	0.320664	erythrocyte membrane protein 1, PfEMP1	protein_coding_gene
PF3D7_0113800	1522.56	-0.81164	0.266106	15.1692	0.000508223	0.0192326	DBL containing protein, unknown function	protein_coding_gene
PF3D7_1148700	2108.67	-0.810901	0.27461	18.241	0.0001094	0.00673957	Plasmodium exported protein (PHISTc), unknown function	protein_coding_gene
PF3D7_0906800	1029.24	-0.802196	0.308381	6.96141	0.0307857	0.25209	conserved Plasmodium protein, unknown function	protein_coding_gene
PF3D7_1016900	31298.6	-0.801184	0.31969	6.31478	0.0425366	0.300256	early transcribed membrane protein 10.3	protein_coding_gene
PF3D7_1209800	241.675	-0.799342	0.45505	6.09291	0.0475272	0.316729	ATP synthase mitochondrial F1 complex assembly factor 1, putative	protein_coding_gene
PF3D7_1107800	14016.3	-0.795205	0.250252	17.888	0.000130517	0.00735617	AP2 domain transcription factor, putative	protein_coding_gene
PF3D7_0420900	1213.34	-0.794014	0.368831	6.08474	0.0477216	0.317624	erythrocyte membrane protein 1, PfEMP1	protein_coding_gene
PF3D7_1327300	4876.58	-0.782895	0.31652	27.5581	1.03711e-06	0.00027473	conserved Plasmodium protein, unknown function	protein_coding_gene
PF3D7_1006700	6089.89	-0.781549	0.307153	8.67925	0.0130414	0.158472	conserved Plasmodium protein, unknown function	protein_coding_gene
PF3D7_1305300	11200.2	-0.780479	0.334932	6.89291	0.0318583	0.258179	translational activator GCN1, putative	protein_coding_gene
PF3D7_1237900	8293.49	-0.778336	0.305435	13.1958	0.00136323	0.0361119	conserved Plasmodium protein, unknown function	protein_coding_gene
PF3D7_0702000	411.742	-0.777737	0.518608	7.62388	0.0221053	0.212163	Plasmodium exported protein (hyp12), unknown function	protein_coding_gene
PF3D7_0425600	245.962	-0.772114	0.325141	6.17959	0.0455113	0.308731	rifin, pseudogene	pseudogene
PF3D7_0625900	1052.66	-0.772064	0.312692	6.13558	0.0465238	0.312796	conserved Plasmodium protein, unknown function	protein_coding_gene
PF3D7_1301500	2679.63	-0.771741	0.298978	6.61213	0.0366601	0.27911	Plasmodium exported protein (PHISTa), unknown function	protein_coding_gene
PF3D7_1456100	891.183	-0.771378	0.411518	6.73181	0.0345308	0.268392	serine hydroxymethyltransferase	protein_coding_gene
PF3D7_0201800	9621.53	-0.766192	0.247451	15.5768	0.000414511	0.0168929	knob associated heat shock protein 40	protein_coding_gene
PF3D7_0422200	20282.2	-0.765521	0.310329	8.12484	0.0172074	0.185985	erythrocyte membrane-associated antigen	protein_coding_gene
PF3D7_1447800	5750.32	-0.764718	0.287291	12.7397	0.00171245	0.0422178	calponin homology domain-containing protein, putative	protein_coding_gene
PF3D7_1454300	395.476	-0.762091	0.3027	7.97626	0.0185344	0.194446	SNF1-related serine/threonine protein kinase KIN	protein_coding_gene
PF3D7_0831400	31436.8	-0.758435	0.296408	10.3372	0.00569245	0.0992059	Plasmodium exported protein, unknown function	protein_coding_gene
PF3D7_1414700	4428.68	-0.75648	0.285421	8.99097	0.0111592	0.147195	ubiquitin carboxyl-terminal hydrolase, putative	protein_coding_gene
PF3D7_1466800	7121.25	-0.751712	0.233901	10.211	0.00606319	0.103289	NOC3 domain-containing protein, putative	protein_coding_gene
PF3D7_1031900	2116.16	-0.751243	0.231199	10.45	0.00538046	0.0952221	conserved Plasmodium protein, unknown function	protein_coding_gene
PF3D7_1438800	147.317	-0.750372	0.406467	7.49691	0.0235541	0.219129	OST-HTH associated domain protein, putative	protein_coding_gene
PF3D7_1322100	8010.32	-0.749578	0.231362	13.169	0.0013816	0.0364165	histone-lysine N-methyltransferase SET2	protein_coding_gene
PF3D7_0410000	3534.36	-0.746078	0.246089	14.6127	0.000671263	0.0230932	erythrocyte vesicle protein 1	protein_coding_gene
PF3D7_0832500	33.647	-0.743771	0.725878	6.56105	0.0376085	0.283025	rifin	protein_coding_gene
PF3D7_0631400	86.1047	-0.742557	0.564711	8.41935	0.0148512	0.172926	Pfmc-2TM Maurer's cleft two transmembrane protein	protein_coding_gene
PF3D7_0726400	12219.3	-0.741054	0.319662	6.18438	0.0454024	0.308731	conserved Plasmodium membrane protein, unknown function	protein_coding_gene
PF3D7_1462400	5311.17	-0.74041	0.304584	6.27069	0.0434847	0.302851	conserved Plasmodium protein, unknown function	protein_coding_gene
PF3D7_0622900	8238.74	-0.7375	0.228658	21.2076	2.48215e-05	0.00273967	AP2 domain transcription factor AP2Tel	protein_coding_gene
PF3D7_0533100	6230.02	-0.733498	0.300845	6.34085	0.0419858	0.29949	erythrocyte membrane protein 1 (PfEMP1), pseudogene	pseudogene
PF3D7_1465600	506.567	-0.733421	0.281175	6.74692	0.0342709	0.268392	conserved Plasmodium protein, unknown function	protein_coding_gene
PF3D7_0730300	46021.3	-0.731206	0.231085	10.0186	0.00667562	0.109159	AP2 domain transcription factor AP2-L, putative	protein_coding_gene
PF3D7_1115700	71315	-0.730511	0.231699	10.0442	0.00659074	0.108778	cysteine proteinase falcipain 2a	protein_coding_gene
PF3D7_1150300	436.389	-0.726304	0.296485	8.19496	0.0166145	0.183921	rifin	protein_coding_gene
PF3D7_0731800	335.765	-0.726198	0.296084	7.70169	0.0212618	0.208254	alpha/beta hydrolase, putative	protein_coding_gene
PF3D7_0424300	184.069	-0.726164	0.432413	9.28701	0.00962391	0.135245	erythrocyte binding antigen-165, pseudogene	pseudogene
PF3D7_1241400	204.409	-0.724171	0.339654	9.75745	0.00760671	0.117494	RNA-binding protein, putative	protein_coding_gene
PF3D7_0110500	10994.3	-0.719939	0.265043	10.4835	0.00529087	0.0941066	bromodomain protein 3, putative	protein_coding_gene
PF3D7_0201700	516.967	-0.717543	0.43076	6.73871	0.0344118	0.268392	DnaJ protein, putative	protein_coding_gene
PF3D7_1463600	497.293	-0.716645	0.477871	22.2126	1.50172e-05	0.00219565	conserved Plasmodium protein, unknown function	protein_coding_gene
PF3D7_1016800	882.084	-0.713496	0.296772	9.61222	0.0081796	0.12361	Plasmodium exported protein (PHISTc), unknown function	protein_coding_gene
PF3D7_0602100	10560.1	-0.708411	0.315565	8.92928	0.0115088	0.148355	ATP-dependent RNA helicase MTR4	protein_coding_gene
PF3D7_1372200	5517.76	-0.70424	0.277915	16.7404	0.000231673	0.0113968	histidine-rich protein III	protein_coding_gene
PF3D7_0412200	1127.67	-0.70131	0.321704	7.73526	0.0209078	0.206275	conserved Plasmodium protein, unknown function	protein_coding_gene
PF3D7_1135800	3304.62	-0.699992	0.265728	6.76953	0.0338856	0.267544	conserved Plasmodium protein, unknown function	protein_coding_gene
PF3D7_0921200	6032.83	-0.697902	0.279121	6.14603	0.0462814	0.311958	conserved Plasmodium membrane protein, unknown function	protein_coding_gene
PF3D7_1434500	18685.6	-0.684353	0.280741	8.94241	0.0114335	0.147885	dynein-related AAA-type ATPase, putative	protein_coding_gene
PF3D7_0905300	378.816	-0.682636	0.338215	6.18012	0.0454991	0.308731	dynein heavy chain, putative	protein_coding_gene
PF3D7_0506000	1296.52	-0.680711	0.336031	14.0906	0.000871487	0.0276461	conserved Plasmodium protein, unknown function	protein_coding_gene
PF3D7_1237200	8259.6	-0.674758	0.2497	11.9025	0.00260264	0.0581806	conserved Plasmodium protein, unknown function	protein_coding_gene
PF3D7_1030300	5723.1	-0.673696	0.334088	11.2965	0.00352373	0.0712547	conserved Plasmodium protein, unknown function	protein_coding_gene
PF3D7_1036400	53.9163	-0.671064	0.831818	6.53465	0.0381082	0.284505	liver stage antigen 1	protein_coding_gene
PF3D7_0300900	457.877	-0.670397	0.333647	7.33903	0.0254888	0.22734	stevor	protein_coding_gene
PF3D7_0731500	3440.73	-0.667222	0.324484	19.7861	5.05236e-05	0.00441109	erythrocyte binding antigen-175	protein_coding_gene
PF3D7_0418600	649.444	-0.666837	0.308448	9.17862	0.0101599	0.139088	regulator of chromosome condensation, putative	protein_coding_gene
PF3D7_0831300	6510.8	-0.664922	0.267863	17.0062	0.000202837	0.010333	Plasmodium exported protein, unknown function	protein_coding_gene
PF3D7_0808600	363.143	-0.659622	0.339689	8.4772	0.0144278	0.169487	erythrocyte membrane protein 1, PfEMP1	protein_coding_gene
PF3D7_1021700	21948	-0.653457	0.261818	11.4269	0.00330127	0.0675294	VPS13 domain-containing protein, putative	protein_coding_gene
PF3D7_1476500	1368.99	-0.652798	0.319429	7.6554	0.0217597	0.209987	probable protein, unknown function	protein_coding_gene
PF3D7_0302300	1372.91	-0.652655	0.269035	12.8495	0.00162091	0.0412092	erythrocyte membrane protein 1 (PfEMP1), pseudogene	pseudogene
PF3D7_0831700	191239	-0.651459	0.248943	7.87851	0.0194627	0.198968	heat shock protein 70	protein_coding_gene
PF3D7_0811300	29840.2	-0.650731	0.349502	7.85292	0.0197133	0.198968	CCR4-associated factor 1	protein_coding_gene
PF3D7_1408200	11502.3	-0.646533	0.243006	12.0048	0.0024728	0.0557484	AP2 domain transcription factor AP2-G2	protein_coding_gene
PF3D7_1041300	660.939	-0.646125	0.268199	6.92902	0.0312883	0.254632	erythrocyte membrane protein 1, PfEMP1	protein_coding_gene
PF3D7_1123100	12050.9	-0.645618	0.233628	14.6935	0.000644691	0.0225827	calcium-dependent protein kinase 7	protein_coding_gene
PF3D7_0831500	6312.53	-0.645461	0.276983	6.53622	0.0380783	0.284505	Plasmodium exported protein (PHIST), unknown function	protein_coding_gene
PF3D7_1228400	6816.98	-0.643582	0.302005	6.33744	0.0420575	0.29949	conserved Plasmodium protein, unknown function	protein_coding_gene
PF3D7_1147200	42.6712	-0.638892	0.804629	6.47947	0.0391743	0.290273	tubulin--tyrosine ligase, putative	protein_coding_gene
PF3D7_0214700	102.094	-0.637735	0.493359	9.20897	0.0100069	0.138597	conserved Plasmodium protein, unknown function	protein_coding_gene
PF3D7_1438400	6542.5	-0.637108	0.296946	7.49508	0.0235756	0.219129	metacaspase-2	protein_coding_gene
PF3D7_1214200	1654.32	-0.636676	0.237769	7.91998	0.0190633	0.196844	histone-lysine N-methyltransferase SET5	protein_coding_gene
PF3D7_1305900	9814.7	-0.636652	0.218766	9.92002	0.00701285	0.112674	conserved Plasmodium protein, unknown function	protein_coding_gene
PF3D7_0105000	2690.11	-0.6353	0.230469	13.72	0.0010489	0.0302015	non-coding RNA	ncRNA_gene
PF3D7_1036900	51869.6	-0.63403	0.284268	9.51774	0.00857531	0.126304	conserved Plasmodium protein, unknown function	protein_coding_gene
PF3D7_1040200	243.704	-0.630611	0.41276	10.7929	0.00453265	0.0838643	stevor	protein_coding_gene
PF3D7_0115600	345.897	-0.625462	0.43219	12.8299	0.00163693	0.0412092	rifin	protein_coding_gene
PF3D7_0302100	11774.8	-0.623404	0.28399	7.84499	0.0197916	0.198968	serine/threonine protein kinase	protein_coding_gene
PF3D7_1200100	24186.2	-0.61932	0.228402	8.07948	0.017602	0.188015	erythrocyte membrane protein 1, PfEMP1	protein_coding_gene
PF3D7_0916600	1884.9	-0.617184	0.246969	6.4702	0.0393563	0.291124	methyltransferase, putative	protein_coding_gene
PF3D7_0937600	2777.31	-0.614389	0.237857	13.7753	0.0010203	0.0300688	erythrocyte membrane protein 1, PfEMP1	protein_coding_gene
PF3D7_1346700	1027.01	-0.611479	0.276382	6.45853	0.0395866	0.291291	6-cysteine protein	protein_coding_gene
PF3D7_1110400	42399.4	-0.610396	0.290523	9.12415	0.0104404	0.141466	RNA-binding protein, putative	protein_coding_gene
PF3D7_0420300	14407	-0.607048	0.245127	6.88122	0.0320452	0.258648	AP2 domain transcription factor, putative	protein_coding_gene
PF3D7_1139300	11372.6	-0.60667	0.296584	6.05818	0.0483595	0.319861	AP2 domain transcription factor AP2-G5	protein_coding_gene
PF3D7_0731100	17584.1	-0.604377	0.246064	6.02097	0.0492678	0.320664	EMP1-trafficking protein	protein_coding_gene
PF3D7_0108300	47234.9	-0.601549	0.327501	7.07384	0.0291028	0.246304	conserved Plasmodium protein, unknown function	protein_coding_gene
PF3D7_1107300	49700.5	-0.598599	0.272548	9.77887	0.00752569	0.117268	polyadenylate-binding protein-interacting protein 1, putative	protein_coding_gene
PF3D7_1302000	12344.8	-0.59819	0.252272	6.32629	0.0422925	0.30019	EMP1-trafficking protein	protein_coding_gene
PF3D7_0606600	11609.5	-0.596506	0.244899	9.88477	0.00713756	0.113537	conserved Plasmodium protein, unknown function	protein_coding_gene
PF3D7_1246100	1637.28	-0.595732	0.263104	7.3851	0.0249084	0.226355	delta-aminolevulinic acid synthetase	protein_coding_gene
PF3D7_1237100	9430.11	-0.594712	0.288032	8.27653	0.0159505	0.179037	conserved Plasmodium protein, unknown function	protein_coding_gene
PF3D7_1253000	33472.2	-0.592664	0.258939	9.49668	0.00866607	0.126304	gametocyte erythrocyte cytosolic protein	protein_coding_gene
PF3D7_1453900	6896.27	-0.590801	0.340871	6.40817	0.040596	0.294229	conserved Plasmodium protein, unknown function	protein_coding_gene
PF3D7_1342800	42165.7	-0.590066	0.243189	6.01009	0.0495365	0.320832	phosphoenolpyruvate carboxykinase	protein_coding_gene
PF3D7_0102600	2112.11	-0.586061	0.361987	9.93708	0.0069533	0.112313	serine/threonine protein kinase, FIKK family	protein_coding_gene
PF3D7_0718000	804.505	-0.586039	0.309253	7.06174	0.0292795	0.246452	dynein heavy chain, putative	protein_coding_gene
PF3D7_1478600	1416.53	-0.585973	0.291637	15.6133	0.000407014	0.0167458	EMP1-trafficking protein	protein_coding_gene
PF3D7_1447400	5546.47	-0.585706	0.230296	12.1276	0.00232556	0.0535703	conserved Plasmodium protein, unknown function	protein_coding_gene
PF3D7_0221200	7537.66	-0.585063	0.256504	14.6338	0.000664216	0.0230001	Plasmodium exported protein (hyp15), unknown function	protein_coding_gene
PF3D7_0405700	4486.23	-0.583968	0.328244	7.82603	0.0199802	0.200483	lysine decarboxylase, putative	protein_coding_gene
PF3D7_0706500	22205.9	-0.582408	0.303216	9.44777	0.00888059	0.12855	conserved Plasmodium protein, unknown function	protein_coding_gene
PF3D7_1419300	14384.5	-0.581198	0.227975	6.79389	0.0334753	0.266695	glutathione S-transferase	protein_coding_gene
PF3D7_0511500	80517.2	-0.576714	0.273163	6.59426	0.0369893	0.279391	RNA pseudouridylate synthase, putative	protein_coding_gene
PF3D7_1351000	14277	-0.575426	0.27158	9.06982	0.0107279	0.14389	phosphatidylinositol transfer protein, putative	protein_coding_gene
PF3D7_0931100	16560.2	-0.575377	0.244519	10.654	0.00485856	0.0878521	nucleolar protein Nop52, putative	protein_coding_gene
PF3D7_1212300	3186.97	-0.5738	0.324848	6.02858	0.0490808	0.320664	WD repeat-containing protein, putative	protein_coding_gene
PF3D7_1415400	9617.69	-0.572255	0.287826	8.6873	0.0129891	0.158472	Btz domain-containing protein, putative	protein_coding_gene
PF3D7_0903500	5526.3	-0.571986	0.247478	6.22238	0.044548	0.307409	nucleoporin NUP138, putative	protein_coding_gene
PF3D7_0206300	24908.9	-0.57182	0.260379	15.4762	0.000435892	0.0174951	pentafunctional AROM polypeptide, putative, pseudogene	pseudogene
PF3D7_1344900	10270.9	-0.570645	0.297233	6.17368	0.045646	0.309249	conserved Plasmodium protein, unknown function	protein_coding_gene
PF3D7_1366300	19800.4	-0.570637	0.253932	7.09967	0.0287294	0.244315	conserved Plasmodium protein, unknown function	protein_coding_gene
PF3D7_1301300	172.131	-0.570585	0.459886	7.18334	0.0275523	0.238127	Plasmodium exported protein (PHISTa-like), unknown function, pseudogene	pseudogene
PF3D7_0826100	46571.6	-0.569715	0.272935	6.60316	0.0368248	0.27911	HECT-like E3 ubiquitin ligase, putative	protein_coding_gene
PF3D7_1358500	6370.45	-0.567401	0.241081	6.18411	0.0454085	0.308731	zinc finger protein, putative	protein_coding_gene
PF3D7_0919700	7013.59	-0.5666	0.239876	7.86702	0.0195748	0.198968	pyridoxal phosphate homeostasis protein, putative	protein_coding_gene
PF3D7_1001000	18273.9	-0.566429	0.261184	8.90466	0.0116514	0.148744	chondroitin sulfate A ligand	protein_coding_gene
PF3D7_1225000	1949.6	-0.566091	0.309439	6.02499	0.0491688	0.320664	conserved Plasmodium protein, unknown function	protein_coding_gene
PF3D7_1122800	2480.66	-0.566058	0.27827	7.40972	0.0246037	0.224742	calcium-dependent protein kinase 6	protein_coding_gene
PF3D7_0906700	2508.46	-0.565192	0.235158	6.70203	0.0350487	0.268802	leucine-rich repeat protein	protein_coding_gene
PF3D7_1337500	11204.5	-0.565112	0.291439	8.26618	0.0160332	0.179586	conserved Plasmodium protein, unknown function	protein_coding_gene
PF3D7_0936000	2045.06	-0.559686	0.34506	8.2308	0.0163194	0.181639	ring-exported protein 2	protein_coding_gene
PF3D7_0201900	30416.5	-0.559644	0.282419	21.2211	2.46542e-05	0.00273967	erythrocyte membrane protein 3	protein_coding_gene
PF3D7_0104300	22101.4	-0.558897	0.240822	8.87084	0.0118501	0.150196	ubiquitin carboxyl-terminal hydrolase 1, putative	protein_coding_gene
PF3D7_1404800	12052.3	-0.554513	0.220359	6.73726	0.0344368	0.268392	conserved Plasmodium protein, unknown function	protein_coding_gene
PF3D7_0310200	27158.9	-0.55087	0.252719	11.431	0.00329456	0.0675294	phd finger protein, putative	protein_coding_gene
PF3D7_1417200	23601.7	-0.547666	0.252357	9.9185	0.00701819	0.112674	CCR4-NOT transcription complex subunit NOT1, putative	protein_coding_gene
PF3D7_0831800	22961.4	-0.546514	0.342878	11.6698	0.00292375	0.0619602	histidine-rich protein II	protein_coding_gene
PF3D7_1340300	7160.33	-0.543476	0.2628	9.09355	0.0106014	0.143281	nucleolar complex protein 2, putative	protein_coding_gene
PF3D7_1004400	19895.3	-0.541443	0.228409	8.0825	0.0175755	0.188015	RNA-binding protein, putative	protein_coding_gene
PF3D7_0420000	20950.9	-0.540193	0.244903	10.8704	0.00436044	0.0819179	zinc finger protein, putative	protein_coding_gene
PF3D7_1134700	18439.1	-0.535334	0.227143	7.84862	0.0197558	0.198968	DNA-directed RNA polymerase I subunit RPA2, putative	protein_coding_gene
PF3D7_0529700	1898.83	-0.534937	0.330807	6.46188	0.0395204	0.291208	heptatricopeptide repeat-containing protein, putative	protein_coding_gene
PF3D7_1251500	6433.5	-0.534556	0.239034	6.71703	0.0347868	0.268727	ATP-dependent RNA helicase DRS1, putative	protein_coding_gene
PF3D7_1360500	2138.9	-0.531363	0.264015	8.57329	0.013751	0.164083	guanylyl cyclase beta	protein_coding_gene
PF3D7_0402000	88787.8	-0.52968	0.271522	13.5606	0.00113594	0.0320118	Plasmodium exported protein (PHISTa), unknown function	protein_coding_gene
PF3D7_0506500	13115.9	-0.525113	0.271396	8.48262	0.0143887	0.169487	conserved Plasmodium protein, unknown function	protein_coding_gene
PF3D7_0501300	12086.5	-0.524884	0.305745	9.5757	0.00833034	0.125026	skeleton-binding protein 1	protein_coding_gene
PF3D7_1036700	5504.89	-0.524032	0.221075	6.42682	0.0402193	0.293098	phosducin-like protein 2, putative	protein_coding_gene
PF3D7_0624600	35300.2	-0.515213	0.272747	7.35143	0.0253312	0.22734	ISWI chromatin-remodeling complex ATPase	protein_coding_gene
PF3D7_1018600	12497.4	-0.513624	0.223792	9.49953	0.00865372	0.126304	tRNA wybutosine-synthesizing protein, putative	protein_coding_gene
PF3D7_0906890	1709.77	-0.513482	0.23753	7.87466	0.0195002	0.198968	conserved Plasmodium protein, unknown function	protein_coding_gene
PF3D7_0400200	17085.5	-0.513408	0.237113	11.1508	0.00379003	0.0746452	erythrocyte membrane protein 1 (PfEMP1), exon 2, pseudogene	pseudogene
PF3D7_1342900	10590.3	-0.512882	0.269343	8.55908	0.0138491	0.164882	AP2 domain transcription factor AP2-HS	protein_coding_gene
PF3D7_1224300	86317.7	-0.512308	0.321831	6.31937	0.0424392	0.30019	polyadenylate-binding protein 1, putative	protein_coding_gene
PF3D7_0604500	56797.9	-0.508415	0.275821	8.9683	0.0112865	0.147644	GYF domain-containing protein, putative	protein_coding_gene
PF3D7_1106600	3969.94	-0.50792	0.287001	7.22632	0.0269665	0.23421	DEAD/DEAH box helicase, putative	protein_coding_gene
PF3D7_0832200	32604.3	-0.504204	0.265502	14.0135	0.000905768	0.0280445	Plasmodium exported protein (PHISTa-like), unknown function	protein_coding_gene
PF3D7_0726050	2091.38	-0.502695	0.423507	8.32207	0.0155914	0.17726	conserved Plasmodium protein, unknown function	protein_coding_gene
PF3D7_1301700	2439.38	-0.497813	0.315159	10.4863	0.00528348	0.0941066	CX3CL1-binding protein 2	protein_coding_gene
PF3D7_0709300	8170.87	-0.496382	0.254827	6.20982	0.0448286	0.308038	mediator of RNA polymerase II transcription subunit 14, putative	protein_coding_gene
PF3D7_1149400	17776.7	-0.493447	0.25839	7.01177	0.0300202	0.24929	Plasmodium exported protein, unknown function	protein_coding_gene
PF3D7_0502800	3667.32	-0.490828	0.27506	11.752	0.00280602	0.060432	DnaJ protein, putative	protein_coding_gene
PF3D7_1372500	162.937	-0.488051	0.424762	6.04759	0.0486163	0.32036	stevor, pseudogene	pseudogene
PF3D7_1106500	7050	-0.486906	0.310136	6.21041	0.0448153	0.308038	conserved Plasmodium protein, unknown function	protein_coding_gene
PF3D7_0520600	8578.9	-0.485868	0.26064	6.98945	0.030357	0.251299	bis(5'-nucleosyl)-tetraphosphatase [asymmetrical]	protein_coding_gene
PF3D7_0728700	692.33	-0.485507	0.284198	8.74357	0.0126287	0.155577	alpha/beta hydrolase, putative	protein_coding_gene
PF3D7_0401800	4920.68	-0.477051	0.321466	10.1362	0.0062943	0.105864	Plasmodium exported protein (PHISTb), unknown function	protein_coding_gene
PF3D7_0532600	9759.02	-0.476704	0.317997	14.4741	0.000719429	0.0241236	Plasmodium exported protein, unknown function	protein_coding_gene
PF3D7_0909700	3838.15	-0.472163	0.315109	6.40978	0.0405633	0.294229	FHA domain protein, putative	protein_coding_gene
PF3D7_1241800	10956.4	-0.4711	0.283647	6.51402	0.0385033	0.285701	ATP-dependent RNA helicase DBP9, putative	protein_coding_gene
PF3D7_1430300	8141.49	-0.470198	0.264685	6.18043	0.0454922	0.308731	acid phosphatase, putative	protein_coding_gene
PF3D7_1468400	875.17	-0.465144	0.280053	7.26631	0.0264326	0.231854	zinc finger protein, putative	protein_coding_gene
PF3D7_0613600	1410.01	-0.46454	0.355556	8.77619	0.0124244	0.154518	conserved Plasmodium protein, unknown function	protein_coding_gene
PF3D7_1302700	9142.83	-0.463309	0.272177	7.05999	0.0293051	0.246452	ATP-dependent RNA helicase DHR1, putative	protein_coding_gene
PF3D7_0203100	1370.41	-0.462761	0.271091	8.0516	0.0178491	0.189508	protein kinase, putative	protein_coding_gene
PF3D7_1032100	9996.53	-0.461845	0.240961	6.71362	0.0348462	0.268727	mRNA-decapping enzyme subunit 1, putative	protein_coding_gene
PF3D7_0113200	10189.8	-0.461075	0.234107	6.60948	0.0367088	0.27911	Plasmodium exported protein, unknown function	protein_coding_gene
PF3D7_1211100	233.393	-0.460317	0.435284	7.46436	0.0239406	0.221356	HSP20-like chaperone, putative	protein_coding_gene
PF3D7_0403400	9686.7	-0.46011	0.277078	7.44238	0.0242051	0.222636	conserved Plasmodium protein, unknown function	protein_coding_gene
PF3D7_1412400	13195.1	-0.459151	0.245159	7.78553	0.0203889	0.203428	conserved Plasmodium protein, unknown function	protein_coding_gene
PF3D7_1138700	4620.47	-0.457575	0.250744	7.55581	0.0228705	0.214799	protein KIC5	protein_coding_gene
PF3D7_0220500	605.699	-0.456967	0.31097	12.0626	0.00240241	0.0546265	Plasmodium exported protein (hyp2), unknown function	protein_coding_gene
PF3D7_0507800	14040	-0.453458	0.238085	11.8151	0.00271885	0.0595226	conserved protein, unknown function	protein_coding_gene
PF3D7_1115900	1232.41	-0.441843	0.317266	6.20057	0.0450363	0.308272	palmitoyltransferase DHHC9	protein_coding_gene
PF3D7_1133700	10072.1	-0.44159	0.236272	21.6423	1.99728e-05	0.00264539	FHA domain-containing protein, putative	protein_coding_gene
PF3D7_1401500	2227.25	-0.437536	0.350649	9.29367	0.0095919	0.135154	esterase, putative	protein_coding_gene
PF3D7_0532400	30264.7	-0.435439	0.238064	7.54356	0.023011	0.215393	lysine-rich membrane-associated PHISTb protein	protein_coding_gene
PF3D7_0800700	314.749	-0.431792	0.332271	7.35104	0.0253362	0.22734	surface-associated interspersed protein 8.3 (SURFIN 8.3)	protein_coding_gene
PF3D7_1417600	20959.4	-0.431601	0.276218	6.40241	0.0407131	0.294267	ookinete surface and oocyst capsule protein OSCP, putative	protein_coding_gene
PF3D7_1217200	8397.37	-0.425508	0.236971	7.57477	0.0226548	0.214542	multiple RNA-binding domain-containing protein 1, putative	protein_coding_gene
PF3D7_0607800	1864.6	-0.423109	0.287837	6.28612	0.0431505	0.302396	GTP-binding protein, putative	protein_coding_gene
PF3D7_1131900	189.941	-0.413886	0.42384	5.99778	0.0498425	0.320857	conserved Plasmodium protein, unknown function	protein_coding_gene
PF3D7_1361000	6342.69	-0.41014	0.229033	5.99851	0.0498241	0.320857	protein arginine N-methyltransferase 5, putative	protein_coding_gene
PF3D7_0214600	791.146	-0.395852	0.327536	10.9054	0.00428461	0.081071	serine/threonine protein kinase STK2, putative	protein_coding_gene
PF3D7_1207100	16434.8	-0.393345	0.234966	6.96298	0.0307615	0.25209	pre-rRNA-processing protein ESF1, putative	protein_coding_gene
PF3D7_0214800	2421.07	-0.391474	0.23379	6.33902	0.0420242	0.29949	conserved Plasmodium membrane protein, unknown function	protein_coding_gene
PF3D7_1212700	57794.8	-0.387457	0.238197	7.55652	0.0228624	0.214799	eukaryotic translation initiation factor 3 subunit A, putative	protein_coding_gene
PF3D7_0425500	111.249	-0.38068	0.529854	6.60762	0.0367429	0.27911	stevor	protein_coding_gene
PF3D7_0911100	826.972	-0.380259	0.281527	12.3754	0.00205455	0.0488117	START domain-containing protein, putative	protein_coding_gene
PF3D7_1250900	1937.67	-0.376515	0.240338	7.56611	0.022753	0.214799	conserved protein, unknown function	protein_coding_gene
PF3D7_0301900	1838.97	-0.371601	0.254773	8.60259	0.013551	0.162726	conserved protein, unknown function	protein_coding_gene
PF3D7_1476200	8453.18	-0.355934	0.230383	7.66631	0.0216412	0.209607	Plasmodium exported protein (PHISTb), unknown function	protein_coding_gene
PF3D7_1448800	5731.41	-0.352492	0.257217	6.27543	0.0433819	0.302851	Appr-1-p processing domain protein	protein_coding_gene
PF3D7_1110300	6958.02	-0.352466	0.253425	6.60526	0.0367862	0.27911	G-patch domain-containing protein, putative	protein_coding_gene
PF3D7_1444900	1735.44	-0.351906	0.260182	8.84201	0.0120221	0.152013	conserved protein, unknown function	protein_coding_gene
PF3D7_0406500	18036.7	-0.347494	0.235365	10.9338	0.00422437	0.0805897	NYN domain-containing protein, putative	protein_coding_gene
PF3D7_0607000	43167.2	-0.336704	0.231961	6.35438	0.0417026	0.298568	translation initiation factor IF-2, putative	protein_coding_gene
PF3D7_0215500	2421.96	-0.333839	0.250462	6.36539	0.0414738	0.297735	conserved Plasmodium protein, unknown function	protein_coding_gene
PF3D7_1353200	1555.8	-0.325589	0.280428	13.7289	0.00104423	0.0302015	membrane associated histidine-rich protein 2	protein_coding_gene
PF3D7_0832000	14.9878	-0.325368	1.23474	6.10426	0.0472582	0.315739	stevor	protein_coding_gene
PF3D7_0414000	14853.8	-0.323831	0.264939	6.29664	0.0429241	0.301848	structural maintenance of chromosomes protein 3	protein_coding_gene
PF3D7_0113000	31586.2	-0.319726	0.262025	11.3332	0.00345965	0.0702269	glutamic acid-rich protein GARP	protein_coding_gene
PF3D7_1455400	10516.2	-0.314979	0.235355	13.4151	0.00122166	0.0337103	hemolysin III	protein_coding_gene
PF3D7_1143100	895.788	-0.302819	0.310074	9.62003	0.00814773	0.12361	AP2 domain transcription factor AP2-O	protein_coding_gene
PF3D7_1036500	699.198	-0.300417	0.269777	8.11791	0.017267	0.185985	conserved Plasmodium protein, unknown function	protein_coding_gene
PF3D7_1343800	2870.19	-0.296407	0.248661	6.03416	0.048944	0.320664	VPS13 domain-containing protein, putative	protein_coding_gene
PF3D7_0107700	1849.87	-0.286966	0.404798	6.63441	0.0362541	0.276764	dolichyl-diphosphooligosaccharide--protein glycosyltransferase subunit OST3/OST6, putative	protein_coding_gene
PF3D7_0312300	11133.6	-0.285405	0.22611	12.6039	0.00183276	0.0445411	26S proteasome regulatory subunit RPN12, putative	protein_coding_gene
PF3D7_0315300	2204.02	-0.283069	0.269675	8.94049	0.0114445	0.147885	conserved Plasmodium protein, unknown function	protein_coding_gene
PF3D7_0709050	500.232	-0.277074	0.471452	7.17491	0.0276687	0.238244	small nucleolar RNA	ncRNA_gene
PF3D7_0903600	1800.74	-0.273509	0.277455	7.57279	0.0226772	0.214542	conserved protein, unknown function	protein_coding_gene
PF3D7_0202400	60000.1	-0.264053	0.30311	7.43878	0.0242488	0.222652	translation-enhancing factor	protein_coding_gene
PF3D7_0828800	366.744	-0.262705	0.462479	10.0825	0.00646566	0.107047	GPI-anchored micronemal antigen	protein_coding_gene
PF3D7_0613900	1494.5	-0.250125	0.281108	8.37201	0.0152069	0.175457	myosin E, putative	protein_coding_gene
PF3D7_1351700	1014.94	-0.244702	0.321614	14.0788	0.000876659	0.0276461	inner membrane complex protein 1f, putative	protein_coding_gene
PF3D7_0830800	2832.66	-0.239674	0.281192	9.89977	0.00708424	0.113391	surface-associated interspersed protein 8.2 (SURFIN 8.2)	protein_coding_gene
PF3D7_0934200	1164.51	-0.231358	0.346775	10.7542	0.00462131	0.0844266	conserved protein, unknown function	protein_coding_gene
PF3D7_1035500	3145.05	-0.228894	0.285956	13.8325	0.000991534	0.0296788	merozoite surface protein 6	protein_coding_gene
PF3D7_1457300	46393.8	-0.218221	0.241688	6.3199	0.0424278	0.30019	MA3 domain-containing protein, putative	protein_coding_gene
PF3D7_1467600	3420.5	-0.216783	0.257659	11.7794	0.00276774	0.0601222	conserved Plasmodium protein, unknown function	protein_coding_gene
PF3D7_1102500	5455.37	-0.214912	0.289736	16.627	0.000245188	0.0116277	gametocyte exported protein 2	protein_coding_gene
PF3D7_1201000	91410.9	-0.210645	0.250225	7.91575	0.0191037	0.196844	Plasmodium exported protein (PHISTb), unknown function	protein_coding_gene
PF3D7_0808700	718.04	-0.206429	0.269972	6.77828	0.0337376	0.267544	erythrocyte membrane protein 1, PfEMP1	protein_coding_gene
PF3D7_1235300	20704	-0.20133	0.246349	6.26236	0.0436663	0.303601	CCR4-NOT transcription complex subunit 4, putative	protein_coding_gene
PF3D7_0821300	7802.26	-0.201151	0.222364	7.85124	0.0197299	0.198968	ATP-dependent RNA helicase DHX36, putative	protein_coding_gene
PF3D7_1031300	3615.62	-0.199485	0.246985	8.72846	0.0127245	0.156052	SAE2 domain-containing protein, putative	protein_coding_gene
PF3D7_1017600	13200.5	-0.196964	0.24631	7.22762	0.026949	0.23421	conserved Plasmodium protein, unknown function	protein_coding_gene
PF3D7_1201600	654.558	-0.19514	0.282287	8.97588	0.0112438	0.147481	NIMA related kinase 3	protein_coding_gene
PF3D7_1132100	47.0006	-0.194408	0.871445	7.9352	0.0189188	0.1962	RNA-binding protein, putative	protein_coding_gene
PF3D7_0926200	2432.53	-0.190793	0.283438	11.681	0.00290737	0.0618605	conserved Plasmodium protein, unknown function	protein_coding_gene
PF3D7_1019700	4295.89	-0.186619	0.25812	6.18508	0.0453865	0.308731	conserved Plasmodium protein, unknown function	protein_coding_gene
PF3D7_0512200	6176.6	-0.176513	0.262726	6.13726	0.0464848	0.312796	glutathione synthetase	protein_coding_gene
PF3D7_0817000	873.536	-0.166188	0.342725	6.43532	0.0400487	0.293063	NEDD8-activating enzyme E1 catalytic subunit, putative	protein_coding_gene
PF3D7_1251400	1834.49	-0.166167	0.256392	8.00324	0.018286	0.192986	conserved Plasmodium protein, unknown function	protein_coding_gene
PF3D7_1234000	5982.47	-0.164337	0.237039	6.76362	0.0339858	0.267544	conserved Plasmodium protein, unknown function	protein_coding_gene
PF3D7_0919200	355.141	-0.149203	0.383471	16.1193	0.000316039	0.0144342	PPPDE peptidase, putative	protein_coding_gene
PF3D7_1310000	2022.07	-0.146679	0.259328	10.2676	0.00589426	0.101389	ATP synthase subunit O, mitochondrial, putative	protein_coding_gene
PF3D7_0202200	652.371	-0.144215	0.276791	7.65732	0.0217388	0.209987	EMP1-trafficking protein	protein_coding_gene
PF3D7_0926700	23852.9	-0.123409	0.2736	6.64872	0.0359956	0.275187	glutamine-dependent NAD(+) synthetase, putative	protein_coding_gene
PF3D7_1301600	850.527	-0.119735	0.291369	7.17661	0.0276452	0.238244	erythrocyte binding antigen-140	protein_coding_gene
PF3D7_0929700	2064.32	-0.119045	0.335675	11.2457	0.00361425	0.0719861	conserved Plasmodium protein, unknown function	protein_coding_gene
PF3D7_MIT01400	3499.93	-0.116775	0.263067	19.14	6.97903e-05	0.00520773	cytochrome c oxidase subunit 3	protein_coding_gene
PF3D7_0218400	10077	-0.114647	0.236767	6.72251	0.0346918	0.268709	ATP-dependent RNA helicase DDX47, putative	protein_coding_gene
PF3D7_1459300	2277.93	-0.102185	0.267013	7.93641	0.0189073	0.1962	OPA3-like protein, putative	protein_coding_gene
PF3D7_1035800	1027.56	-0.0968145	0.278652	7.3584	0.0252431	0.22734	probable protein, unknown function	protein_coding_gene
PF3D7_0112300	1273.95	-0.0941825	0.336337	9.15083	0.010302	0.139949	18S ribosomal RNA	ncRNA_gene
PF3D7_1126300	6783.21	-0.0812192	0.239954	8.79218	0.0123254	0.153829	DnaJ protein, putative	protein_coding_gene
PF3D7_1205400	5538	-0.0636569	0.246631	7.69588	0.0213236	0.208436	kelch domain-containing protein, putative	protein_coding_gene
PF3D7_1351800	3908.87	-0.0444144	0.225635	6.20447	0.0449486	0.308069	conserved Plasmodium protein, unknown function	protein_coding_gene
PF3D7_1315000	1578.08	-0.0415327	0.45957	10.2286	0.00601032	0.102757	conserved protein, unknown function	protein_coding_gene
PF3D7_0201500	5507.77	-0.0142833	0.251554	9.02059	0.0109952	0.146364	Plasmodium exported protein (hyp9), unknown function	protein_coding_gene
PF3D7_1220500	2480.04	-0.0124945	0.228626	8.39808	0.01501	0.17401	ribosome biogenesis protein TSR3, putative	protein_coding_gene
PF3D7_1234300	5279	-0.00897449	0.271835	11.8926	0.00261556	0.0582237	DNA polymerase epsilon subunit B, putative	protein_coding_gene
PF3D7_0928100	243.092	0.0208929	0.420861	8.98926	0.0111688	0.147195	conserved Plasmodium protein, unknown function	protein_coding_gene
PF3D7_1217500	33976.7	0.0282116	0.225471	19.4182	6.07283e-05	0.00487483	conserved Plasmodium protein, unknown function	protein_coding_gene
PF3D7_0822900	772.744	0.0308188	0.407042	13.2451	0.00133004	0.0354098	PhIL1-interacting candidate PIC2	protein_coding_gene
PF3D7_1206300	2396.08	0.0326939	0.258938	7.94547	0.0188219	0.1962	conserved Plasmodium protein, unknown function	protein_coding_gene
PF3D7_1356800	2717.79	0.0343636	0.267653	9.73751	0.00768293	0.118326	serine/threonine protein kinase ARK3, putative	protein_coding_gene
PF3D7_1433100	3722.69	0.0421795	0.287652	9.07666	0.0106913	0.143778	HID1 domain-containing protein, putative	protein_coding_gene
PF3D7_1238400	245.254	0.0426543	0.405001	6.73862	0.0344133	0.268392	conserved protein, unknown function	protein_coding_gene
PF3D7_1335400	3199.89	0.0440862	0.271021	8.46866	0.0144895	0.169835	reticulocyte binding protein 2 homologue a	protein_coding_gene
PF3D7_0500800	319043	0.0518034	0.247549	17.4746	0.000160483	0.00858829	mature parasite-infected erythrocyte surface antigen	protein_coding_gene
PF3D7_0312500	5411.22	0.0518555	0.243277	6.16048	0.0459483	0.310899	multidrug-resistant modulator MFR3	protein_coding_gene
PF3D7_1119500	7560.49	0.0543629	0.238754	9.32665	0.00943504	0.134166	AP-4 complex subunit mu, putative	protein_coding_gene
PF3D7_1335300	1074.62	0.0680451	0.283648	10.4826	0.00529327	0.0941066	reticulocyte binding protein 2 homologue b	protein_coding_gene
PF3D7_0217000	504.647	0.0683118	0.325327	6.32452	0.04233	0.30019	conserved Plasmodium membrane protein, unknown function	protein_coding_gene
PF3D7_1213200	7154.92	0.0683651	0.228785	7.96549	0.0186344	0.195109	mediator of RNA polymerase II transcription subunit 18, putative	protein_coding_gene
PF3D7_0507600	8803.42	0.0704088	0.265055	6.06084	0.0482953	0.319836	protein CAF40, putative	protein_coding_gene
PF3D7_1477200	889.106	0.0802212	0.431832	8.81944	0.0121586	0.153008	Plasmodium exported protein (hyp15), unknown function	protein_coding_gene
PF3D7_1247300	5440.98	0.0803425	0.254728	7.28295	0.0262136	0.231081	GPI mannosyltransferase 2, putative	protein_coding_gene
PF3D7_1333300	12511.2	0.0815803	0.234735	9.55402	0.00842116	0.125773	transmembrane emp24 domain-containing protein, putative	protein_coding_gene
PF3D7_1466400	20551.5	0.0830701	0.252583	6.87938	0.0320746	0.258648	AP2 domain transcription factor AP2-EXP	protein_coding_gene
PF3D7_0220000	29048	0.0931553	0.248032	6.27108	0.0434763	0.302851	liver stage antigen 3	protein_coding_gene
PF3D7_0320600	3748.59	0.0955614	0.27387	6.3136	0.0425618	0.300256	conserved protein, unknown function	protein_coding_gene
PF3D7_1428400	436.982	0.098014	0.304672	6.26993	0.0435012	0.302851	WD and tetratricopeptide repeats protein 1, putative	protein_coding_gene
PF3D7_1226400	15277.7	0.102766	0.232739	7.32225	0.0257036	0.22887	regulator of MON1-CCZ1 complex, putative	protein_coding_gene
PF3D7_1126700	1247.05	0.105963	0.371766	8.23902	0.0162525	0.181275	conserved Plasmodium protein, unknown function	protein_coding_gene
PF3D7_1415100	1273.34	0.107674	0.297637	9.21732	0.00996517	0.138597	conserved protein, unknown function	protein_coding_gene
PF3D7_1422300	3196.25	0.109156	0.237881	6.52316	0.0383278	0.284911	DnaJ protein, putative	protein_coding_gene
PF3D7_0801600	1237.76	0.110579	0.255722	8.96107	0.0113274	0.147814	conserved protein, unknown function	protein_coding_gene
PF3D7_1122300	1273.22	0.125054	0.250864	15.7647	0.000377337	0.015993	conserved Plasmodium protein, unknown function	protein_coding_gene
PF3D7_1011600	1306.93	0.131898	0.293899	10.6825	0.00478991	0.0869073	heptatricopeptide repeat-containing protein, putative	protein_coding_gene
PF3D7_1442600	1524.04	0.132798	0.273813	14.0176	0.000903901	0.0280445	TRAP-like protein	protein_coding_gene
PF3D7_1250200	15953.5	0.141808	0.248395	6.20727	0.0448858	0.308038	CSC1-like protein, putative	protein_coding_gene
PF3D7_0424100	122.796	0.141854	0.4678	9.20646	0.0100194	0.138597	reticulocyte binding protein homologue 5	protein_coding_gene
PF3D7_1371000	420.594	0.147385	0.324146	19.7417	5.16592e-05	0.00441109	18S ribosomal RNA	ncRNA_gene
PF3D7_1016600	2493.37	0.148507	0.239033	7.7368	0.0208918	0.206275	Plasmodium exported protein (PHISTc), unknown function	protein_coding_gene
PF3D7_0213000	9993.82	0.149471	0.248002	6.76469	0.0339678	0.267544	conserved protein, unknown function	protein_coding_gene
PF3D7_1427900	65200	0.150433	0.234264	6.03681	0.0488792	0.320664	leucine-rich repeat protein	protein_coding_gene
PF3D7_0323400	806.925	0.152707	0.321533	8.94692	0.0114078	0.147885	Rh5 interacting protein	protein_coding_gene
PF3D7_1456700	16387.5	0.155612	0.231789	6.22396	0.0445127	0.307409	conserved Plasmodium protein, unknown function	protein_coding_gene
PF3D7_1353000	25074.6	0.158405	0.233726	7.04138	0.0295791	0.248352	tryptophan-rich protein, pseudogene	pseudogene
PF3D7_1006000	409.155	0.158559	0.372264	7.27075	0.026374	0.231724	IMP1-like protein, putative	protein_coding_gene
PF3D7_1323500	20070	0.160639	0.254062	7.67442	0.0215537	0.209142	plasmepsin V	protein_coding_gene
PF3D7_0305000	14703.9	0.182021	0.272534	7.0813	0.0289944	0.246174	elongation factor Ts	protein_coding_gene
PF3D7_1463000	4457.63	0.186621	0.263801	15.0074	0.000551043	0.0205593	mediator of RNA polymerase II transcription subunit 20, putative	protein_coding_gene
PF3D7_0522400	7099.84	0.199443	0.285492	6.38855	0.0409962	0.295507	conserved Plasmodium protein, unknown function	protein_coding_gene
PF3D7_1124600	77035.2	0.203736	0.245642	6.42715	0.0402127	0.293098	ethanolamine kinase	protein_coding_gene
PF3D7_0804000	68408.3	0.208145	0.236523	7.30384	0.0259413	0.229828	cactin homolog, putative	protein_coding_gene
PF3D7_0205100	1249.2	0.218934	0.337517	7.79883	0.0202537	0.202461	conserved Plasmodium protein, unknown function	protein_coding_gene
PF3D7_1014100	369.798	0.224866	0.42037	14.5112	0.000706202	0.0241236	merozoite surface protein MSA180	protein_coding_gene
PF3D7_1428000	5354.18	0.234223	0.29545	9.49887	0.00865656	0.126304	conserved Plasmodium membrane protein, unknown function	protein_coding_gene
PF3D7_1353600	12060.3	0.236353	0.261281	6.95584	0.0308716	0.252404	ER lumen protein retaining receptor	protein_coding_gene
PF3D7_1352300	1576.59	0.238049	0.282035	6.7278	0.0346001	0.268392	conserved Plasmodium protein, unknown function	protein_coding_gene
PF3D7_1455100	7991.62	0.238553	0.271432	6.37211	0.0413346	0.297138	protein tyrosine phosphatase, putative	protein_coding_gene
PF3D7_0526400	3763.61	0.238808	0.248242	9.34652	0.00934175	0.133647	conserved Plasmodium protein, unknown function	protein_coding_gene
PF3D7_1250400	1319.05	0.239268	0.295001	8.92101	0.0115565	0.14839	conserved Plasmodium protein, unknown function	protein_coding_gene
PF3D7_0515900	8264.79	0.2397	0.22688	11.2838	0.00354604	0.0714331	NLI interacting factor-like phosphatase, putative	protein_coding_gene
PF3D7_0827500	13503.3	0.240283	0.28511	5.99879	0.0498171	0.320857	ribosomal protein L21, apicoplast, putative	protein_coding_gene
PF3D7_1405700	4445.11	0.251257	0.238547	6.15092	0.0461684	0.311593	RING zinc finger protein, putative	protein_coding_gene
PF3D7_0931200	5492.47	0.253091	0.238237	7.2306	0.0269088	0.23421	selenoprotein	protein_coding_gene
PF3D7_1108700	50911.3	0.254227	0.237394	7.00283	0.0301546	0.250015	heat shock protein J2	protein_coding_gene
PF3D7_0413800	1128.25	0.264809	0.258764	7.58	0.0225956	0.214536	50S ribosomal protein L10, putative	protein_coding_gene
PF3D7_1210000	6198.09	0.266824	0.247538	14.0347	0.000896191	0.0280445	50S ribosomal protein L1, apicoplast, putative	protein_coding_gene
PF3D7_0804400	7476.67	0.285501	0.263389	10.7847	0.00455122	0.0838643	methionine aminopeptidase 1c, putative	protein_coding_gene
PF3D7_1121700	18057.3	0.287001	0.242641	8.65027	0.0132318	0.160416	protein GCN20	protein_coding_gene
PF3D7_0517200	1306.64	0.290927	0.420337	8.88129	0.0117883	0.150131	conserved Plasmodium protein, unknown function	protein_coding_gene
PF3D7_1205900	13240.5	0.291911	0.272559	6.44188	0.0399174	0.292912	conserved protein, unknown function	protein_coding_gene
PF3D7_0104200	18111.9	0.295116	0.237438	6.70283	0.0350348	0.268802	StAR-related lipid transfer protein	protein_coding_gene
PF3D7_0810400	3707.9	0.303559	0.242884	9.83346	0.00732302	0.115126	aquaporin, putative	protein_coding_gene
PF3D7_0523900	2415.08	0.306231	0.263927	6.02374	0.0491995	0.320664	MerC domain-containing protein, putative	protein_coding_gene
PF3D7_1317000	31505.6	0.308379	0.25352	6.23032	0.0443713	0.307293	U4/U6.U5 tri-snRNP-associated protein 2, putative	protein_coding_gene
PF3D7_1003600	2369.77	0.317911	0.33221	7.85344	0.0197082	0.198968	inner membrane complex protein 1c, putative	protein_coding_gene
PF3D7_1309200	15525.2	0.320689	0.239626	6.00523	0.049657	0.320832	protein phosphatase PPM6, putative	protein_coding_gene
PF3D7_0912900	36675.5	0.321461	0.283467	6.1042	0.0472596	0.315739	26S proteasome regulatory subunit RPN8, putative	protein_coding_gene
PF3D7_0524500	4489.16	0.322147	0.23144	6.4054	0.0406523	0.294229	conserved Plasmodium protein, unknown function	protein_coding_gene
PF3D7_1242000	3547.89	0.324939	0.281059	7.74329	0.0208241	0.206217	sulfhydryl oxidase, putative	protein_coding_gene
PF3D7_1435600	1705.9	0.32714	0.279241	7.60284	0.022339	0.213247	conserved Plasmodium protein, unknown function	protein_coding_gene
PF3D7_0203200	4434.07	0.327539	0.245824	7.47953	0.0237596	0.220453	conserved Plasmodium protein, unknown function	protein_coding_gene
PF3D7_1309400	9754.86	0.330678	0.247431	9.7593	0.00759967	0.117494	HORMA domain protein, putative	protein_coding_gene
PF3D7_1022200	6303.78	0.331223	0.311451	8.61339	0.013478	0.162658	conserved Plasmodium membrane protein, unknown function	protein_coding_gene
PF3D7_0304900	2225.46	0.332816	0.237809	11.6156	0.00300399	0.0631554	conserved protein, unknown function	protein_coding_gene
PF3D7_1218000	861.319	0.333658	0.358251	7.10034	0.0287197	0.244315	thrombospondin-related apical membrane protein	protein_coding_gene
PF3D7_1014900	3381.06	0.342598	0.240545	8.16365	0.0168767	0.184088	protein KIC8	protein_coding_gene
PF3D7_0415400	14303.1	0.345225	0.253914	6.9394	0.0311264	0.254014	coatomer subunit zeta, putative	protein_coding_gene
PF3D7_1471400	10212.5	0.352441	0.266816	6.76564	0.0339516	0.267544	diacylglycerol kinase, putative	protein_coding_gene
PF3D7_0216600	7030.27	0.356496	0.247689	7.88037	0.0194446	0.198968	sugar transporter, putative	protein_coding_gene
PF3D7_0407800	2447.86	0.356988	0.278821	6.1161	0.0469793	0.31466	protein CINCH	protein_coding_gene
PF3D7_0212000	3359.76	0.357808	0.252007	9.98504	0.00678852	0.110663	GDP-fructose:GMP antiporter, putative	protein_coding_gene
PF3D7_1115200	14076.4	0.361738	0.279294	7.7774	0.0204719	0.203834	histone-lysine N-methyltransferase SET7	protein_coding_gene
PF3D7_0929300	6784.47	0.371379	0.225844	6.03262	0.0489816	0.320664	conserved Plasmodium protein, unknown function	protein_coding_gene
PF3D7_1316600	18190.1	0.37202	0.253579	13.4662	0.00119081	0.033031	choline-phosphate cytidylyltransferase	protein_coding_gene
PF3D7_1325600	2552.1	0.374545	0.231204	6.81228	0.0331689	0.265451	mitochondrial fission 1 protein	protein_coding_gene
PF3D7_0316000	1093.02	0.380969	0.292553	6.23694	0.0442248	0.30668	microneme associated antigen	protein_coding_gene
PF3D7_1331700	33696.3	0.383468	0.269223	14.7992	0.000611492	0.0218998	glutamine--tRNA ligase, putative	protein_coding_gene
PF3D7_1448400	15159.6	0.383762	0.237987	6.73414	0.0344905	0.268392	ubiquitin-protein ligase, putative	protein_coding_gene
PF3D7_0305600	20086.8	0.384737	0.230844	8.38461	0.0151114	0.174804	DNA-(apurinic or apyrimidinic site) endonuclease	protein_coding_gene
PF3D7_1104400	32785.7	0.385921	0.242233	8.36279	0.0152772	0.175457	thioredoxin-like mero protein	protein_coding_gene
PF3D7_0907800	12781.8	0.38978	0.253768	7.05991	0.0293063	0.246452	ribosomal protein L35, apicoplast, putative	protein_coding_gene
PF3D7_API03600	238.002	0.395461	0.404317	8.748	0.0126007	0.155577	chaperone protein ClpM	protein_coding_gene
PF3D7_1001800	4982.7	0.396096	0.221767	8.17981	0.0167408	0.183921	Plasmodium exported protein (PHISTc), unknown function	protein_coding_gene
PF3D7_1226800	5469.05	0.396931	0.26223	6.46524	0.0394539	0.291124	ataxin-3, putative	protein_coding_gene
PF3D7_0830100	4468.04	0.397521	0.235482	18.2976	0.000106346	0.0067074	non-coding RNA	ncRNA_gene
PF3D7_0527000	93328.2	0.402029	0.274368	6.04882	0.0485865	0.32036	DNA replication licensing factor MCM3, putative	protein_coding_gene
PF3D7_0911600	2740.53	0.410887	0.263938	7.16433	0.0278154	0.238457	conserved Plasmodium protein, unknown function	protein_coding_gene
PF3D7_1472700	7711.46	0.411501	0.262609	10.1462	0.00626297	0.105864	DNA-directed RNA polymerase, alpha subunit, putative	protein_coding_gene
PF3D7_0311300	23914.4	0.412052	0.250638	8.74477	0.0126211	0.155577	phosphatidylinositol 3- and 4-kinase, putative	protein_coding_gene
PF3D7_1346900	2657.92	0.412272	0.277969	7.01387	0.0299886	0.24929	conserved Plasmodium protein, unknown function	protein_coding_gene
PF3D7_0316900	9922.51	0.41257	0.266731	7.15901	0.0278895	0.238705	E3 ubiquitin-protein ligase, putative	protein_coding_gene
PF3D7_1410700	11166.5	0.41612	0.242849	9.2157	0.00997324	0.138597	conserved protein, unknown function	protein_coding_gene
PF3D7_0807800	31239.6	0.423254	0.219016	7.77403	0.0205065	0.203834	26S proteasome regulatory subunit RPN10, putative	protein_coding_gene
PF3D7_1212500	22823.7	0.425615	0.244964	7.46022	0.0239902	0.221428	glycerol-3-phosphate 1-O-acyltransferase	protein_coding_gene
PF3D7_1243100	9303.08	0.429434	0.271918	7.84834	0.0197585	0.198968	zinc finger protein, putative	protein_coding_gene
PF3D7_1445100	11961.3	0.43036	0.24765	6.83645	0.0327706	0.263058	histidine--tRNA ligase, putative	protein_coding_gene
PF3D7_0316100	4971.62	0.430634	0.232856	7.34176	0.025454	0.22734	ribosomal protein L27, mitochondrial, putative	protein_coding_gene
PF3D7_0219500	4586.04	0.433637	0.240149	7.02851	0.0297699	0.248751	pseudouridine synthase, putative	protein_coding_gene
PF3D7_0415000	4544.87	0.440042	0.262263	7.6464	0.0218577	0.210549	ATPase GET3	protein_coding_gene
PF3D7_1122100	2564.32	0.442483	0.286259	8.18055	0.0167346	0.183921	GPI transamidase component GPI16, putative	protein_coding_gene
PF3D7_0729200	3434.07	0.444273	0.256881	7.02975	0.0297515	0.248751	1-cys peroxiredoxin	protein_coding_gene
PF3D7_1342400	45471.9	0.44536	0.262266	7.44485	0.0241753	0.222636	casein kinase II beta chain	protein_coding_gene
PF3D7_1401800	14355.6	0.447205	0.247233	15.9978	0.000335825	0.0145836	choline kinase	protein_coding_gene
PF3D7_0709100	20749.5	0.447838	0.240484	6.97386	0.0305947	0.252085	Cg1 protein	protein_coding_gene
PF3D7_0722100	4647.82	0.448456	0.242202	6.96474	0.0307344	0.25209	protein pelota homolog, putative	protein_coding_gene
PF3D7_0503100	5553.72	0.449547	0.254562	7.36667	0.0251391	0.22734	4-diphosphocytidyl-2-C-methyl-D-erythritol kinase, putative	protein_coding_gene
PF3D7_0615500	22127	0.449577	0.327596	6.88918	0.0319179	0.258179	cdc2-related protein kinase 5	protein_coding_gene
PF3D7_1323300	4473.63	0.451397	0.238398	6.01361	0.0494493	0.320832	N-acetyltransferase, GNAT family, putative	protein_coding_gene
PF3D7_1422100	6803.38	0.452248	0.294019	7.91252	0.0191345	0.196844	ribosomal protein L21, mitochondrial, putative	protein_coding_gene
PF3D7_0307400	12522.8	0.452794	0.273262	7.3961	0.0247718	0.2255	ATP-dependent Clp protease proteolytic subunit	protein_coding_gene
PF3D7_0504400	18816.3	0.453633	0.241137	7.30721	0.0258976	0.229825	ATP-dependent helicase, putative	protein_coding_gene
PF3D7_0630700	1422.01	0.454127	0.265481	6.07938	0.0478497	0.317725	bifunctional methylenetetrahydrofolate dehydrogenase/cyclohydrolase, putative	protein_coding_gene
PF3D7_1422600	4018.85	0.454137	0.2354	7.72107	0.0210567	0.207309	conserved Plasmodium protein, unknown function	protein_coding_gene
PF3D7_0530200	12353.9	0.459525	0.268516	7.61516	0.0222018	0.21232	phosphoenolpyruvate/phosphate translocator	protein_coding_gene
PF3D7_1201700	553.024	0.460908	0.312542	8.15832	0.0169216	0.184088	conserved Plasmodium membrane protein, unknown function	protein_coding_gene
PF3D7_1006400	3561.49	0.462017	0.245603	9.04781	0.0108466	0.145069	heptatricopeptide repeat-containing protein, putative	protein_coding_gene
PF3D7_0208000	3897.42	0.462919	0.258686	6.72962	0.0345687	0.268392	serine repeat antigen 1	protein_coding_gene
PF3D7_1477300	229.623	0.463321	0.431576	6.35579	0.0416733	0.298568	Plasmodium exported protein (PHIST), unknown function	protein_coding_gene
PF3D7_1315100	878.706	0.46348	0.348494	7.92169	0.019047	0.196844	serine/threonine protein kinase PK9	protein_coding_gene
PF3D7_0613700	14711.7	0.466228	0.247591	10.3873	0.00555159	0.0973917	syntaxin-binding protein, putative	protein_coding_gene
PF3D7_1435500	12529	0.468043	0.274012	7.70133	0.0212656	0.208254	clathrin light chain, putative	protein_coding_gene
PF3D7_0408500	13168.1	0.468406	0.259184	6.59259	0.0370202	0.279391	flap endonuclease 1	protein_coding_gene
PF3D7_1368200	22164.8	0.468407	0.227214	7.30827	0.0258839	0.229825	ABC transporter E family member 1, putative	protein_coding_gene
PF3D7_0529000	21539.5	0.473698	0.223565	9.55249	0.00842758	0.125773	T-cell immunomodulatory protein homolog, putative	protein_coding_gene
PF3D7_0417200	22121.2	0.477397	0.226401	11.0838	0.00391899	0.0760542	bifunctional dihydrofolate reductase-thymidylate synthase	protein_coding_gene
PF3D7_0806900	2128.16	0.477553	0.268028	18.2538	0.000108703	0.00673957	conserved protein, unknown function	protein_coding_gene
PF3D7_1032000	6784.14	0.481504	0.250691	11.7786	0.00276894	0.0601222	ribosome maturation factor RimM, putative	protein_coding_gene
PF3D7_0629900	16024.6	0.48156	0.27524	8.05805	0.0177917	0.189508	CRAL/TRIO domain-containing protein, putative	protein_coding_gene
PF3D7_1220900	67652.4	0.482037	0.227738	9.275	0.00968185	0.1357	heterochromatin protein 1	protein_coding_gene
PF3D7_1134800	7428.77	0.482927	0.236328	8.2778	0.0159404	0.179037	coatomer subunit delta	protein_coding_gene
PF3D7_1330500	4011.62	0.48399	0.235823	6.39827	0.0407975	0.294476	CTLH domain-containing protein, putative	protein_coding_gene
PF3D7_1115400	43280.4	0.48489	0.327237	9.20079	0.0100479	0.138629	cysteine proteinase falcipain 3	protein_coding_gene
PF3D7_1306900	5389.27	0.487511	0.228965	7.01666	0.0299468	0.24929	U1 small nuclear ribonucleoprotein A, putative	protein_coding_gene
PF3D7_0908000	5784.67	0.488499	0.265868	6.52236	0.0383431	0.284911	plasma membrane protein 1, putative	protein_coding_gene
PF3D7_1321100	2103.57	0.488685	0.261654	11.1107	0.00386669	0.075873	protein kinase domain-containing protein, putative	protein_coding_gene
PF3D7_0306600	4121.98	0.491284	0.227262	6.12813	0.0466976	0.313169	ATP synthase-associated protein, putative	protein_coding_gene
PF3D7_0312100	8240.65	0.492343	0.234723	6.80785	0.0332425	0.265479	E3 ubiquitin-protein ligase	protein_coding_gene
PF3D7_1469900	1132.16	0.493831	0.271818	6.0075	0.0496007	0.320832	protein MGET	protein_coding_gene
PF3D7_1339800	1722.13	0.495528	0.232668	8.63352	0.013343	0.161396	mitotic-spindle organizing protein 1, putative	protein_coding_gene
PF3D7_1215400	6860.85	0.500064	0.232523	8.34539	0.0154107	0.17634	conserved Plasmodium protein, unknown function	protein_coding_gene
PF3D7_1141600	5005.25	0.501557	0.30204	9.96329	0.00686276	0.111189	dolichol-phosphate mannosyltransferase	protein_coding_gene
PF3D7_0612800	2063.97	0.502017	0.259833	8.51036	0.0141905	0.168191	6-cysteine protein P12p	protein_coding_gene
PF3D7_0918600	4882.78	0.502178	0.278715	12.1275	0.00232563	0.0535703	ATP-dependent DNA helicase Q1	protein_coding_gene
PF3D7_0717200	5106.4	0.502895	0.235661	9.04339	0.0108706	0.145069	conserved Plasmodium protein, unknown function	protein_coding_gene
PF3D7_1321500	11641.8	0.503782	0.247351	6.76866	0.0339004	0.267544	3',5'-cyclic nucleotide phosphodiesterase beta	protein_coding_gene
PF3D7_0603100	2752.46	0.508878	0.28068	6.05056	0.0485442	0.32036	RNA-binding protein, putative	protein_coding_gene
PF3D7_1117100	9982.48	0.514879	0.219783	8.16727	0.0168462	0.184088	ubiquitin carboxyl-terminal hydrolase UCH54	protein_coding_gene
PF3D7_0506900	17285.9	0.515681	0.370469	6.58014	0.0372513	0.280736	rhomboid protease ROM4	protein_coding_gene
PF3D7_1216400	12347.2	0.519166	0.262025	12.4861	0.00194394	0.0466018	conserved Plasmodium membrane protein, unknown function	protein_coding_gene
PF3D7_1426700	11093.5	0.520797	0.225202	8.02732	0.0180671	0.191439	phosphoenolpyruvate carboxylase	protein_coding_gene
PF3D7_0320800	16480.4	0.522147	0.28689	7.56298	0.0227887	0.214799	ATP-dependent RNA helicase DDX6	protein_coding_gene
PF3D7_1459400	4447.2	0.52288	0.229416	6.54417	0.0379274	0.284505	conserved protein, unknown function	protein_coding_gene
PF3D7_1247000	2764.24	0.522974	0.225543	8.17789	0.0167569	0.183921	F-box only protein 9 homolog, putative	protein_coding_gene
PF3D7_1332600	24093.8	0.523998	0.277799	7.46725	0.023906	0.221356	DNA-(apurinic or apyrimidinic site) lyase 1	protein_coding_gene
PF3D7_1018000	8273	0.529131	0.229429	11.9069	0.00259681	0.0581806	tRNA pseudouridine synthase, putative	protein_coding_gene
PF3D7_1437800	4068.41	0.536072	0.225293	6.46628	0.0394334	0.291124	trafficking protein particle complex subunit 5, putative	protein_coding_gene
PF3D7_0216800	1933.39	0.536529	0.271126	6.40611	0.0406378	0.294229	TMEM121 domain-containing protein, putative	protein_coding_gene
PF3D7_1352500	59417.8	0.539212	0.265224	9.38998	0.00914097	0.1316	thioredoxin-related protein, putative	protein_coding_gene
PF3D7_1224100	4802.24	0.540236	0.234525	6.86514	0.0323037	0.260099	conserved protein, unknown function	protein_coding_gene
PF3D7_1229300	2649.69	0.54178	0.23199	6.80604	0.0332726	0.265479	PhIL1-interacting candidate PIC1	protein_coding_gene
PF3D7_0410300	8915.4	0.54204	0.237572	8.71938	0.0127823	0.156399	protein phosphatase PPM1, putative	protein_coding_gene
PF3D7_0414600	5913.87	0.555446	0.329977	6.70185	0.0350519	0.268802	acylated pleckstrin-homology domain-containing protein, putative	protein_coding_gene
PF3D7_1437200	66050.3	0.560256	0.250403	7.40144	0.0247058	0.225286	ribonucleoside-diphosphate reductase large subunit, putative	protein_coding_gene
PF3D7_1139700	3633.49	0.56264	0.233672	7.34871	0.0253657	0.22734	adrenodoxin reductase, putative	protein_coding_gene
PF3D7_1436200	1711.54	0.563526	0.296169	10.1056	0.00639137	0.106491	basal complex protein BCP1	protein_coding_gene
PF3D7_1306600	9394.19	0.563808	0.266446	7.1726	0.0277006	0.238244	V-type proton ATPase subunit H, putative	protein_coding_gene
PF3D7_1449900	3676.44	0.568974	0.223916	14.246	0.000806341	0.0262086	conserved protein, unknown function	protein_coding_gene
PF3D7_0518200	7804.57	0.574104	0.235372	6.07658	0.0479167	0.317725	SWIB/MDM2 domain-containing protein	protein_coding_gene
PF3D7_1409300	11212	0.575421	0.227594	13.3612	0.00125505	0.0342744	DNA damage-inducible protein 1	protein_coding_gene
PF3D7_1205000	4392.13	0.575608	0.228984	10.1047	0.00639435	0.106491	conserved protein, unknown function	protein_coding_gene
PF3D7_0302200	60.3781	0.575828	0.558581	9.19001	0.0101022	0.138848	cytoadherence linked asexual protein 3.2	protein_coding_gene
PF3D7_0404800	541.566	0.576057	0.335364	13.6472	0.00108781	0.0311524	sporozoite-specific protein S10, putative	protein_coding_gene
PF3D7_0306500	7799.29	0.577217	0.250794	7.80307	0.0202109	0.202415	cytochrome c oxidase subunit 6c, putative	protein_coding_gene
PF3D7_0925300	9636.74	0.580268	0.2561	6.97646	0.0305549	0.252085	proline--tRNA ligase, putative	protein_coding_gene
PF3D7_0205600	4799.38	0.583015	0.253915	6.85196	0.0325174	0.261422	conserved Plasmodium protein, unknown function	protein_coding_gene
PF3D7_0816200	2898.88	0.583377	0.231607	6.2924	0.0430153	0.301848	vacuolar protein sorting-associated protein 2, putative	protein_coding_gene
PF3D7_1005900	8476.46	0.585819	0.279339	9.89071	0.00711639	0.113537	conserved protein, unknown function	protein_coding_gene
PF3D7_0515100	4365.44	0.58727	0.263552	7.28687	0.0261623	0.231013	rhomboid protease ROM9	protein_coding_gene
PF3D7_0609800	2958.79	0.588329	0.45019	6.07896	0.0478598	0.317725	palmitoyltransferase DHHC2, putative	protein_coding_gene
PF3D7_1116500	9116.81	0.588846	0.239261	8.91242	0.0116063	0.148527	folate transporter 2	protein_coding_gene
PF3D7_1306200	10119.2	0.59242	0.232003	12.2498	0.00218775	0.0515143	conserved protein, unknown function	protein_coding_gene
PF3D7_1323200	11463.6	0.593704	0.231598	10.0992	0.00641196	0.106491	V-type proton ATPase subunit G, putative	protein_coding_gene
PF3D7_0905900	6494.87	0.593962	0.276565	6.38406	0.0410884	0.295769	coatomer subunit beta, putative	protein_coding_gene
PF3D7_1322000	16649.9	0.595216	0.235406	9.49619	0.00866818	0.126304	nucleoside-diphosphatase, putative	protein_coding_gene
PF3D7_0810100	3042.22	0.596116	0.265333	6.27248	0.0434459	0.302851	ribosomal protein L33, apicoplast, putative	protein_coding_gene
PF3D7_1247500	4454.36	0.596449	0.27638	22.2264	1.49138e-05	0.00219565	serine/threonine protein kinase, putative	protein_coding_gene
PF3D7_1308800	17654.4	0.59892	0.285488	6.29449	0.0429704	0.301848	tyrosine recombinase	protein_coding_gene
PF3D7_0523800	4328.67	0.600787	0.238135	9.34287	0.00935883	0.133647	divalent metal transporter, putative	protein_coding_gene
PF3D7_1330200	6481.35	0.60087	0.250644	10.8518	0.00440119	0.0821039	conserved Plasmodium protein, unknown function	protein_coding_gene
PF3D7_1133300	916.324	0.601245	0.25625	7.98332	0.018469	0.194144	LEM3/CDC50 family protein, putative	protein_coding_gene
PF3D7_1443900	23999.6	0.603777	0.257805	9.36042	0.00927708	0.133198	heat shock protein 90, putative	protein_coding_gene
PF3D7_0310400	15477.6	0.608925	0.24178	13.394	0.0012346	0.0338907	parasite-infected erythrocyte surface protein	protein_coding_gene
PF3D7_0911800	1451.52	0.609161	0.251839	6.70145	0.035059	0.268802	conserved Plasmodium protein, unknown function	protein_coding_gene
PF3D7_0612400	863.986	0.611201	0.261125	6.71502	0.0348218	0.268727	conserved Plasmodium protein, unknown function	protein_coding_gene
PF3D7_0209600	4056.03	0.612347	0.269177	8.0059	0.0182617	0.192986	transporter, putative	protein_coding_gene
PF3D7_1340800	3385.62	0.616243	0.247916	8.3171	0.0156302	0.177321	mitochondrial pyruvate carrier protein 1, putative	protein_coding_gene
PF3D7_1430700	6190.95	0.616493	0.244523	7.03449	0.0296811	0.248751	NADP-specific glutamate dehydrogenase	protein_coding_gene
PF3D7_0105500	1064.4	0.618103	0.24604	6.65627	0.03586	0.274547	conserved protein, unknown function	protein_coding_gene
PF3D7_0401300	12.5583	0.618169	1.5106	6.78416	0.0336387	0.267544	rifin	protein_coding_gene
PF3D7_1012000	7958.03	0.618183	0.240985	9.66731	0.00795736	0.121844	RING zinc finger protein, putative	protein_coding_gene
PF3D7_1432200	619.028	0.622746	0.320832	10.7938	0.00453061	0.0838643	conserved Plasmodium protein, unknown function	protein_coding_gene
PF3D7_0409500	8429.93	0.622769	0.292851	6.03386	0.0489513	0.320664	NAD(P)-binding protein, putative	protein_coding_gene
PF3D7_0316700	11817.7	0.628642	0.274645	7.41266	0.0245675	0.224742	protein YOP1, putative	protein_coding_gene
PF3D7_0926400	10863.8	0.629253	0.276193	7.71783	0.0210909	0.207309	monocarboxylate transporter, putative	protein_coding_gene
PF3D7_1011900	10383.2	0.630367	0.286934	6.93696	0.0311644	0.254014	heme oxygenase	protein_coding_gene
PF3D7_1425800	3772.97	0.630489	0.227979	7.58548	0.0225337	0.214333	conserved Plasmodium protein, unknown function	protein_coding_gene
PF3D7_1311900	43277.2	0.630798	0.240277	10.3278	0.00571921	0.0993455	V-type proton ATPase catalytic subunit A	protein_coding_gene
PF3D7_0207500	41802	0.631342	0.303786	8.30321	0.0157392	0.17749	serine repeat antigen 6	protein_coding_gene
PF3D7_API02700	1036.13	0.634646	0.285875	9.24659	0.00982037	0.137278	apicoplast ribosomal protein S12	protein_coding_gene
PF3D7_1412800	16585.4	0.638408	0.245303	12.8734	0.00160166	0.0411923	glycylpeptide N-tetradecanoyltransferase	protein_coding_gene
PF3D7_1343000	500990	0.639475	0.234912	7.35055	0.0253424	0.22734	phosphoethanolamine N-methyltransferase	protein_coding_gene
PF3D7_1429100	11959.7	0.644036	0.235353	8.68231	0.0130215	0.158472	ribosomal protein L15, apicoplast, putative	protein_coding_gene
PF3D7_0802800	3795.24	0.647294	0.317233	7.53087	0.0231576	0.216382	serine/threonine protein phosphatase 2B catalytic subunit A	protein_coding_gene
PF3D7_0723300	3564.07	0.648051	0.24244	9.50549	0.00862797	0.126304	conserved protein, unknown function	protein_coding_gene
PF3D7_1124000	5831.67	0.650698	0.233901	12.651	0.0017901	0.0439071	endoplasmic reticulum oxidoreductin, putative	protein_coding_gene
PF3D7_1421900	10219.1	0.650885	0.248868	8.81404	0.0121915	0.153058	copper transporter, putative	protein_coding_gene
PF3D7_1031800	5614.88	0.651618	0.281424	8.19238	0.0166359	0.183921	conserved protein, unknown function	protein_coding_gene
PF3D7_0205800	2498.89	0.653272	0.23927	7.64008	0.0219269	0.210832	PH domain-containing protein, putative	protein_coding_gene
PF3D7_1034300	54.9643	0.655928	0.70165	13.7727	0.00102163	0.0300688	thioredoxin-like associated protein 2, putative	protein_coding_gene
PF3D7_0605300	5777.06	0.656813	0.248311	8.83121	0.0120872	0.152472	serine/threonine protein kinase ARK1	protein_coding_gene
PF3D7_1230300	459.378	0.661618	0.279493	13.1468	0.00139704	0.0366412	subpellicular microtubule protein 2, putative	protein_coding_gene
PF3D7_1305200	1969.17	0.665291	0.244224	7.36312	0.0251836	0.22734	AP2 domain transcription factor, putative	protein_coding_gene
PF3D7_1207500	2381.36	0.666258	0.235811	8.25393	0.0161317	0.180308	RNA-binding protein, putative	protein_coding_gene
PF3D7_1443700	5351.47	0.668459	0.248626	10.439	0.00540994	0.0952221	dephospho-CoA kinase	protein_coding_gene
PF3D7_0803200	2677.04	0.669392	0.236816	8.14506	0.0170343	0.184681	filament assembling protein, putative	protein_coding_gene
PF3D7_0811600	5706.71	0.673931	0.23293	12.7387	0.00171325	0.0422178	conserved protein, unknown function	protein_coding_gene
PF3D7_0815500	4189.53	0.674229	0.268341	6.25739	0.0437749	0.303957	conserved Plasmodium protein, unknown function	protein_coding_gene
PF3D7_1028700	7270.47	0.674335	0.24934	8.9494	0.0113937	0.147885	merozoite TRAP-like protein	protein_coding_gene
PF3D7_1312100	2744.41	0.675488	0.279172	9.07643	0.0106925	0.143778	GYF domain-containing protein, putative	protein_coding_gene
PF3D7_1347100	7885.02	0.68042	0.258827	12.2204	0.00222011	0.0515883	DNA topoisomerase 3	protein_coding_gene
PF3D7_0523300	3904.58	0.682447	0.275884	6.41214	0.0405154	0.294229	cytochrome c oxidase subunit ApiCOX18, putative	protein_coding_gene
PF3D7_1227300	667.356	0.685214	0.339697	7.07736	0.0290516	0.246265	conserved Plasmodium protein, unknown function	protein_coding_gene
PF3D7_0310100	320.896	0.685369	0.32328	18.693	8.72716e-05	0.00577956	calcium-dependent protein kinase 3	protein_coding_gene
PF3D7_0303000	3061.37	0.687375	0.243893	8.8761	0.0118189	0.15016	N-ethylmaleimide-sensitive fusion protein	protein_coding_gene
PF3D7_1470400	2145.54	0.689412	0.265982	6.82496	0.0329594	0.264174	mitochondrial pyruvate carrier protein 2, putative	protein_coding_gene
PF3D7_0107000	12241.2	0.689792	0.25827	7.25511	0.0265811	0.232771	centrin-1	protein_coding_gene
PF3D7_0413500	13291	0.692191	0.322452	10.607	0.00497411	0.0896356	phosphoglucomutase-2	protein_coding_gene
PF3D7_0803800	51052.6	0.694904	0.250887	9.8419	0.00729219	0.114982	proteasome subunit beta type-4	protein_coding_gene
PF3D7_0317400	3606.76	0.696189	0.270403	10.8634	0.00437576	0.0819179	DNA replication complex GINS protein, putative	protein_coding_gene
PF3D7_1364100	33287.7	0.71649	0.301826	7.58636	0.0225239	0.214333	6-cysteine protein P92	protein_coding_gene
PF3D7_0805700	5082.46	0.717694	0.234507	11.51	0.00316685	0.065796	serine/threonine protein kinase, FIKK family	protein_coding_gene
PF3D7_1135900	35544.3	0.718446	0.273403	7.55263	0.022907	0.214799	3-oxo-5-alpha-steroid 4-dehydrogenase, putative	protein_coding_gene
PF3D7_1331000	811.443	0.718945	0.285907	8.97545	0.0112462	0.147481	protein kinase, putative	protein_coding_gene
PF3D7_1427200	1790.15	0.720697	0.30774	7.98354	0.018467	0.194144	selenoprotein	protein_coding_gene
PF3D7_1027300	37825	0.72132	0.275355	7.76846	0.0205637	0.20402	peroxiredoxin	protein_coding_gene
PF3D7_0210700	1115.41	0.729866	0.260544	9.53653	0.00849511	0.126304	syntaxin, Qa-SNARE family	protein_coding_gene
PF3D7_0924000	8912.34	0.731226	0.269203	22.1176	1.57483e-05	0.00219565	patatin-like phospholipase, putative	protein_coding_gene
PF3D7_1320100	3204.87	0.731744	0.232241	12.7449	0.00170795	0.0422178	ATP-dependent Clp protease adapter protein ClpS	protein_coding_gene
PF3D7_0935800	23868.7	0.732448	0.297989	8.99845	0.0111176	0.147195	cytoadherence linked asexual protein 9	protein_coding_gene
PF3D7_1117300	6527.78	0.73461	0.264995	10.7814	0.00455887	0.0838643	conserved protein, unknown function	protein_coding_gene
PF3D7_0220800	3630.41	0.735861	0.244896	8.91909	0.0115676	0.14839	cytoadherence linked asexual protein 2	protein_coding_gene
PF3D7_1315600	10327.6	0.737988	0.292386	6.52486	0.0382952	0.284911	CDP-diacylglycerol--inositol 3-phosphatidyltransferase	protein_coding_gene
PF3D7_0106000	9431.44	0.738946	0.241268	19.7112	5.24535e-05	0.00441109	conserved protein, unknown function	protein_coding_gene
PF3D7_0611600	3241.37	0.742027	0.234315	10.1409	0.00627974	0.105864	basal complex transmembrane protein 1	protein_coding_gene
PF3D7_1226900	7679.7	0.743731	0.309666	10.2278	0.00601256	0.102757	parasitophorous vacuolar protein 2	protein_coding_gene
PF3D7_1035200	10611.4	0.744926	0.378993	9.16509	0.0102288	0.139312	S-antigen	protein_coding_gene
PF3D7_1137200	1031.79	0.744967	0.296094	6.15185	0.0461469	0.311593	apical exonemal protein	protein_coding_gene
PF3D7_0936100	5854.67	0.747424	0.237255	10.761	0.00460544	0.0844266	early transcribed membrane protein	protein_coding_gene
PF3D7_1228700	7156.79	0.756275	0.259832	11.0008	0.00408519	0.0784178	conserved Plasmodium protein, unknown function	protein_coding_gene
PF3D7_1106100	3722.09	0.759396	0.231371	16.7161	0.000234506	0.0113968	ribosomal protein S15, apicoplast, putative	protein_coding_gene
PF3D7_1128900	2179.81	0.761153	0.309541	6.77789	0.0337443	0.267544	conserved protein, unknown function	protein_coding_gene
PF3D7_1035100	2729.25	0.766627	0.415391	10.0296	0.00663902	0.109159	probable protein, unknown function	protein_coding_gene
PF3D7_0918500	165539	0.768443	0.280134	7.41207	0.0245748	0.224742	telomerase RNA	ncRNA_gene
PF3D7_0604100	3770.16	0.768971	0.278883	8.09768	0.0174426	0.187446	AP2 domain transcription factor	protein_coding_gene
PF3D7_1307400	44.5175	0.769723	0.648022	7.27097	0.0263712	0.231724	conserved Plasmodium protein, unknown function	protein_coding_gene
PF3D7_0322300	15241.5	0.770585	0.230944	19.0143	7.43202e-05	0.00539381	diacylglycerol O-acyltransferase	protein_coding_gene
PF3D7_1202900	78726.7	0.771342	0.352971	11.5786	0.00306006	0.0640799	high mobility group protein B1	protein_coding_gene
PF3D7_1021300	4660.57	0.78189	0.231286	11.4548	0.0032556	0.0671135	apicoplast integral membrane protein, putative	protein_coding_gene
PF3D7_0818000	7725.92	0.78532	0.263969	17.3093	0.000174316	0.00914385	U4/U6.U5 small nuclear ribonucleoprotein, putative	protein_coding_gene
PF3D7_1214100	5685.78	0.786124	0.308784	6.19036	0.0452669	0.308731	GPI ethanolamine phosphate transferase 3, putative	protein_coding_gene
PF3D7_1308000	1891.91	0.786932	0.281713	7.67781	0.0215172	0.209142	conserved Plasmodium membrane protein, unknown function	protein_coding_gene
PF3D7_0321100	1193.3	0.792634	0.255338	9.49644	0.00866712	0.126304	conserved Plasmodium protein, unknown function	protein_coding_gene
PF3D7_0508400	599.826	0.793895	0.31512	12.2211	0.00221931	0.0515883	conserved protein, unknown function	protein_coding_gene
PF3D7_1338900	19581.5	0.797417	0.232908	20.8704	2.93803e-05	0.00296246	serine/threonine protein kinase, putative	protein_coding_gene
PF3D7_0404400	233.509	0.799149	0.432075	6.30873	0.0426656	0.300588	6-cysteine protein P36	protein_coding_gene
PF3D7_1347600	318.93	0.803993	0.330349	6.09988	0.0473617	0.316023	conserved protein, unknown function	protein_coding_gene
PF3D7_0112700	8140.5	0.807037	0.378978	28.7976	5.58072e-07	0.000184792	28S ribosomal RNA	ncRNA_gene
PF3D7_1253400	13211.3	0.807347	0.26897	12.0229	0.00245057	0.0554834	acyl-CoA synthetase	protein_coding_gene
PF3D7_0525400	3816.36	0.811211	0.287186	16.3099	0.00028731	0.0132363	7-helix-1 protein	protein_coding_gene
PF3D7_API01500	664.203	0.827036	0.301849	8.40157	0.0149838	0.17401	apicoplast ribosomal protein L2	protein_coding_gene
PF3D7_0713800	1221.08	0.827428	0.285277	8.58654	0.0136602	0.163367	negative elongation factor A, putative	protein_coding_gene
PF3D7_1439000	14945.1	0.83323	0.229688	13.98	0.000921053	0.0280445	copper transporter	protein_coding_gene
PF3D7_0810300	13257.4	0.834448	0.334042	13.2757	0.00130984	0.0350483	protein phosphatase PPM5, putative	protein_coding_gene
PF3D7_0934800	10520.1	0.835418	0.434335	7.69017	0.0213846	0.208648	cAMP-dependent protein kinase catalytic subunit	protein_coding_gene
PF3D7_0214900	2165.47	0.838122	0.400912	6.00538	0.0496532	0.320832	rhoptry neck protein 6	protein_coding_gene
PF3D7_1334600	2844.93	0.839162	0.293989	13.3275	0.00127636	0.0346025	MSP7-like protein	protein_coding_gene
PF3D7_0611100	1263.45	0.850038	0.247076	11.6865	0.00289946	0.0618605	succinate dehydrogenase subunit 3, putative	protein_coding_gene
PF3D7_0927900	22155	0.856397	0.317878	8.1437	0.0170458	0.184681	phosphatidylserine decarboxylase	protein_coding_gene
PF3D7_0722800	264.672	0.863486	0.412329	15.4309	0.000445885	0.0177616	conserved protein, unknown function	protein_coding_gene
PF3D7_1436600	3739.31	0.86448	0.36631	6.21619	0.0446861	0.307863	cGMP-dependent protein kinase	protein_coding_gene
PF3D7_0403600	6398.33	0.867319	0.240168	22.7776	1.13214e-05	0.0018744	conserved Plasmodium protein, unknown function	protein_coding_gene
PF3D7_0817600	3181.43	0.869794	0.314813	8.08337	0.0175679	0.188015	conserved protein, unknown function	protein_coding_gene
PF3D7_0708600	572.845	0.878779	0.272591	11.7698	0.00278117	0.0601414	inner membrane complex protein 1d, putative	protein_coding_gene
PF3D7_1238600	3010.49	0.878928	0.256471	12.5755	0.00185898	0.0449721	sphingomyelin phosphodiesterase	protein_coding_gene
PF3D7_1131100	8080.28	0.879495	0.314661	19.7507	5.14267e-05	0.00441109	serpentine receptor 1, putative	protein_coding_gene
PF3D7_1121900	1482.54	0.881118	0.249493	14.2531	0.0008035	0.0262086	3-phosphoinositide-dependent protein kinase 1	protein_coding_gene
PF3D7_1343100	17194.9	0.88526	0.351501	14.4585	0.000725064	0.0241597	conserved Plasmodium protein, unknown function	protein_coding_gene
PF3D7_0613300	691.018	0.88584	0.300712	16.6219	0.000245811	0.0116277	rhoptry protein ROP14	protein_coding_gene
PF3D7_0526600	5950.34	0.889946	0.275347	14.7824	0.000616654	0.0219264	conserved Plasmodium protein, unknown function	protein_coding_gene
PF3D7_0207800	14753.5	0.893597	0.263274	20.1241	4.26691e-05	0.0040368	serine repeat antigen 3	protein_coding_gene
PF3D7_0704500	2697.93	0.89378	0.249164	13.318	0.00128246	0.0346025	serine/threonine protein kinase, putative	protein_coding_gene
PF3D7_1307600	13035.6	0.896131	0.261505	14.4761	0.000718706	0.0241236	DNA-directed RNA polymerase subunit alpha, putative	protein_coding_gene
PF3D7_1035900	668.096	0.902389	0.413477	12.5382	0.00189392	0.0456091	merozoites-associated armadillo repeats protein	protein_coding_gene
PF3D7_0821000	9868.9	0.906833	0.244937	18.0327	0.00012141	0.00731183	conserved Plasmodium protein, unknown function	protein_coding_gene
PF3D7_0806400	812.561	0.907058	0.258969	18.9208	7.78772e-05	0.00549352	UDP-N-acetylglucosamine transferase subunit ALG13, putative	protein_coding_gene
PF3D7_1232300	2254.4	0.912468	0.245821	13.7682	0.00102393	0.0300688	cytochrome b5, putative	protein_coding_gene
PF3D7_0612700	1974.74	0.918595	0.274186	13.893	0.000961983	0.0289579	6-cysteine protein P12	protein_coding_gene
PF3D7_1348500	11021.7	0.91965	0.254842	18.5442	9.401e-05	0.00614895	TBC domain protein, putative	protein_coding_gene
PF3D7_0404900	7111.63	0.920728	0.286152	13.5876	0.00112071	0.0319223	6-cysteine protein P41	protein_coding_gene
PF3D7_0715300	2585.12	0.921167	0.291938	11.8334	0.00269411	0.0594724	calcium/calmodulin-dependent protein kinase, putative	protein_coding_gene
PF3D7_0105300	5774.16	0.925019	0.339689	9.72855	0.00771741	0.118513	cyclase-associated protein	protein_coding_gene
PF3D7_1315300	2230.38	0.928302	0.314452	15.0882	0.000529221	0.0198852	conserved protein, unknown function	protein_coding_gene
PF3D7_0918000	80529.8	0.932994	0.343644	9.97856	0.00681057	0.110682	glideosome-associated protein 50	protein_coding_gene
PF3D7_0905500	583.338	0.935482	0.296715	17.9641	0.000125645	0.00731183	conserved protein, unknown function	protein_coding_gene
PF3D7_0415700	1519.05	0.937949	0.284242	30.7892	2.06163e-07	0.000121361	conserved Plasmodium protein, unknown function	protein_coding_gene
PF3D7_0908100	1177.66	0.943526	0.333636	8.17663	0.0167675	0.183921	apicoplast integral membrane protein, putative	protein_coding_gene
PF3D7_0828600	313.715	0.944975	0.371728	6.43174	0.0401205	0.293098	folate transporter 1	protein_coding_gene
PF3D7_0830200	469.952	0.948738	0.404978	21.2225	2.46374e-05	0.00273967	28S ribosomal RNA	ncRNA_gene
PF3D7_0207400	23391.4	0.94977	0.255913	23.856	6.60282e-06	0.00129562	serine repeat antigen 7	protein_coding_gene
PF3D7_1228600	24846.7	0.950441	0.361429	7.02553	0.0298144	0.248751	merozoite surface protein 9	protein_coding_gene
PF3D7_0806300	2954.91	0.960523	0.34015	18.8971	7.88048e-05	0.00549352	ferlin-like protein, putative	protein_coding_gene
PF3D7_1122700	874.189	0.964672	0.260938	15.9655	0.000341293	0.0147006	conserved Plasmodium protein, unknown function	protein_coding_gene
PF3D7_1323000	1421.98	0.96943	0.27031	23.4168	8.22448e-06	0.00145244	beta-hydroxyacyl-ACP dehydratase	protein_coding_gene
PF3D7_1331600	8953.38	0.974364	0.299896	14.3359	0.000770898	0.0255264	3-hydroxyacyl-CoA dehydratase DEH	protein_coding_gene
PF3D7_1236800	992.634	0.974552	0.328631	12.7975	0.00166363	0.0415751	protein-S-isoprenylcysteine O-methyltransferase	protein_coding_gene
PF3D7_0405900	2299.21	0.974559	0.363126	7.06599	0.0292172	0.246452	apical sushi protein	protein_coding_gene
PF3D7_1007200	3063.58	0.976244	0.232505	18.7463	8.49733e-05	0.00577165	rho GTPase-activating protein, putative	protein_coding_gene
PF3D7_1454800	127.003	0.98755	0.608905	15.6231	0.000405021	0.0167458	conserved Plasmodium protein, unknown function	protein_coding_gene
PF3D7_0403900	4137.19	0.992269	0.262168	26.4192	1.8329e-06	0.000461223	SET domain protein, putative	protein_coding_gene
PF3D7_1337700	245.372	0.993923	0.402941	6.0134	0.0494547	0.320832	phosphoinositide-binding protein PH2	protein_coding_gene
PF3D7_1035700	3780.31	0.998702	0.368622	7.61789	0.0221716	0.21232	duffy binding-like merozoite surface protein	protein_coding_gene
PF3D7_1322600	739.048	1.00002	0.313576	13.061	0.00145829	0.0380592	conserved Plasmodium protein, unknown function	protein_coding_gene
PF3D7_0212900	8571.18	1.0037	0.229859	21.1046	2.61335e-05	0.00282561	arginyl-tRNA--protein transferase	protein_coding_gene
PF3D7_1111300	2399.11	1.01076	0.267481	22.1525	1.54755e-05	0.00219565	protein transport protein BOS1, putative	protein_coding_gene
PF3D7_1335100	6015.38	1.01403	0.305623	12.8246	0.00164121	0.0412092	merozoite surface protein 7	protein_coding_gene
PF3D7_0905400	27803.7	1.01641	0.351644	8.78981	0.01234	0.153829	high molecular weight rhoptry protein 3	protein_coding_gene
PF3D7_0522600	1425.83	1.02535	0.38498	12.1094	0.00234676	0.0538232	magnesium transporter NIPA, putative	protein_coding_gene
PF3D7_0815900	2174.09	1.0318	0.318005	11.0648	0.00395652	0.0765024	dihydrolipoyl dehydrogenase, apicoplast	protein_coding_gene
PF3D7_1035600	1194.23	1.03377	0.503518	9.86008	0.0072262	0.114282	merozoite surface protein	protein_coding_gene
PF3D7_1001600	33763.3	1.04754	0.254227	21.0243	2.72035e-05	0.00288249	exported lipase 2	protein_coding_gene
PF3D7_0929400	43702.3	1.06581	0.393037	11.0876	0.00391172	0.0760542	high molecular weight rhoptry protein 2	protein_coding_gene
PF3D7_0404700	831.864	1.0717	0.386076	8.32897	0.0155377	0.17726	dipeptidyl aminopeptidase 3	protein_coding_gene
PF3D7_1143200	9043.42	1.07315	0.318226	16.1002	0.000319076	0.0144484	DnaJ protein, putative	protein_coding_gene
PF3D7_0104100	1068.61	1.13035	0.298445	20.3735	3.76652e-05	0.00369537	protein E140, putative	protein_coding_gene
PF3D7_0404500	703.186	1.15984	0.305176	14.1223	0.000857795	0.0276461	6-cysteine protein P52	protein_coding_gene
PF3D7_1408300	29.412	1.16001	1.11271	6.53614	0.0380798	0.284505	conserved Plasmodium protein, unknown function	protein_coding_gene
PF3D7_1029900	15202.1	1.16031	0.309365	26.1573	2.08935e-06	0.000461223	ORC3 domain-containing protein, putative	protein_coding_gene
PF3D7_1232500	2910.68	1.17367	0.251804	21.5886	2.05161e-05	0.00265108	CG2-related protein, putative	protein_coding_gene
PF3D7_1252100	2904.35	1.17697	0.394933	9.00536	0.0110793	0.147112	rhoptry neck protein 3	protein_coding_gene
PF3D7_0207700	18096.9	1.1797	0.278977	28.2316	7.40603e-07	0.000219962	serine repeat antigen 4	protein_coding_gene
PF3D7_1205200	262.429	1.18462	0.394788	17.6248	0.000148876	0.00804842	HAD domain ookinete protein, putative	protein_coding_gene
PF3D7_1206000	1317.23	1.19863	0.395524	8.45265	0.014606	0.170823	shewanella-like protein phosphatase 2	protein_coding_gene
PF3D7_0207600	148897	1.20359	0.272999	29.0253	4.98015e-07	0.000184669	serine repeat antigen 5	protein_coding_gene
PF3D7_0935400	459.847	1.20569	0.370535	18.0017	0.000123307	0.00731183	gametocyte development protein 1	protein_coding_gene
PF3D7_1452000	2269.43	1.2668	0.479552	7.16741	0.0277726	0.238457	rhoptry neck protein 2	protein_coding_gene
PF3D7_0829900	5786.13	1.31817	0.369713	11.6587	0.00294	0.0620564	non-coding RNA	ncRNA_gene
PF3D7_0312900	348.12	1.32947	0.500985	18.7125	8.64222e-05	0.00577956	hypothetical protein	protein_coding_gene
PF3D7_1141800	1763.6	1.33835	0.411247	17.1976	0.000184329	0.00957429	EELM2 domain-containing protein, putative	protein_coding_gene
PF3D7_1370800	1682.67	1.3589	0.479835	23.6252	7.4107e-06	0.00135386	non-coding RNA	ncRNA_gene
PF3D7_1331400	247.256	1.37612	0.453325	19.7487	5.14778e-05	0.00441109	CPW-WPC family protein	protein_coding_gene
PF3D7_1012200	1166.21	1.3765	0.490681	6.89086	0.0318911	0.258179	rhoptry associated adhesin	protein_coding_gene
PF3D7_1410400	8271.21	1.37752	0.460883	8.16067	0.0169018	0.184088	rhoptry-associated protein 1	protein_coding_gene
PF3D7_0917300	187.27	1.42256	0.5014	8.11739	0.0172715	0.185985	conserved protein, unknown function	protein_coding_gene
PF3D7_0831600	5323.93	1.44413	0.426109	16.3918	0.000275782	0.01293	cytoadherence linked asexual protein 8	protein_coding_gene
PF3D7_1479000	114.524	1.45313	0.494839	9.60985	0.00818931	0.12361	acyl-CoA synthetase	protein_coding_gene
PF3D7_0528300	143.96	1.47341	0.537429	8.59893	0.0135758	0.162726	conserved protein, unknown function	protein_coding_gene
PF3D7_0722200	2591.71	1.51035	0.460213	11.8726	0.00264177	0.058561	rhoptry-associated leucine zipper-like protein 1	protein_coding_gene
PF3D7_0507200	1167.17	1.766	0.413279	38.714	3.92075e-09	4.15442e-06	subtilisin-like protease 3	protein_coding_gene
