# Supplementary figures and images for: A Plasmodium falciparum MORC protein complex modulates epigenetic control of gene expression through interaction with heterochromatin
Source: eLife journal article supplement (doi:10.7554/elife.92201), 2023-11-16

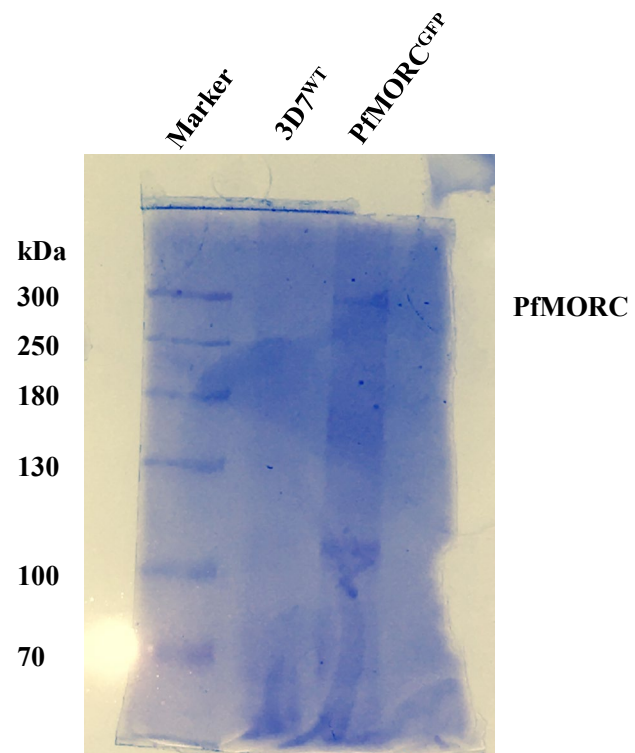

Supplement: fig1-figsupp1-data1 [file elife-92201-fig1-figsupp1-data1-v1.zip]
